# Supplementary material for: Identification of Human Housekeeping Genes and Tissue-Selective Genes by Microarray Meta-Analysis
Source: PLOS journal article supplement (doi:10.1371/journal.pone.0022859), 2011-07-27
Supplement: S4 (10.1371/journal.pone.0022859.s004) [file journal.pone.0022859.s004]

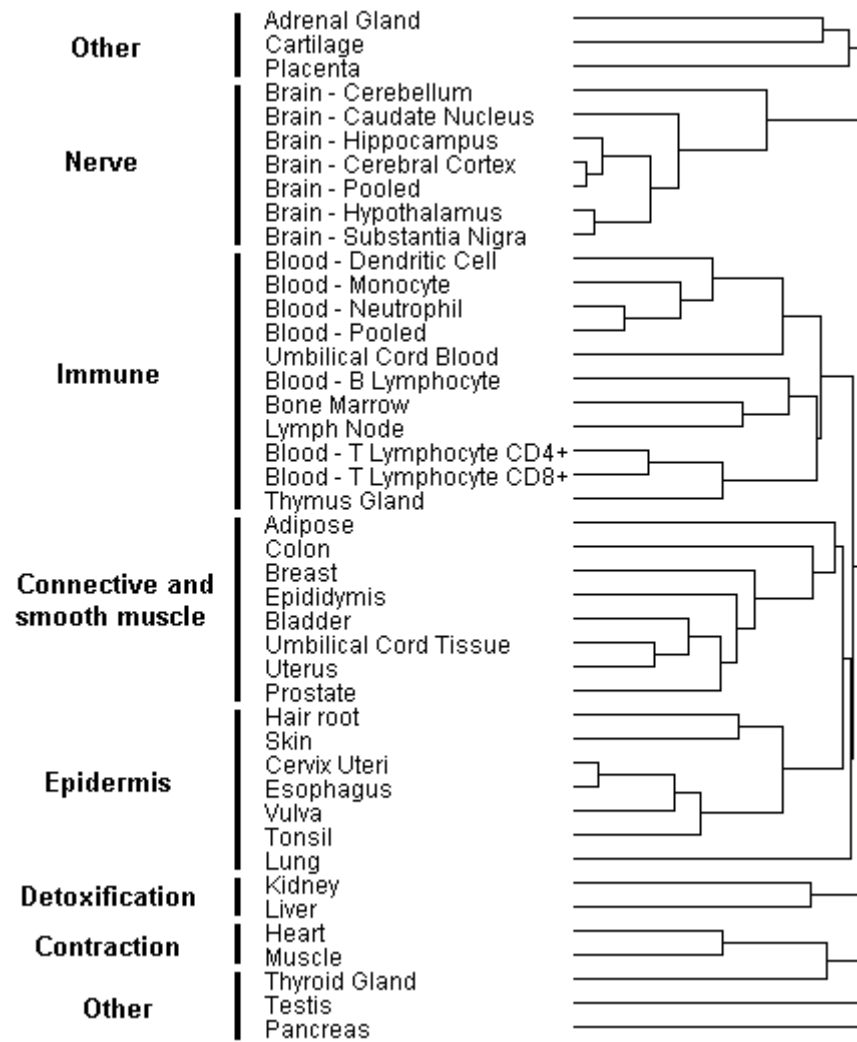

**Figure S4**

**Clustering of 43 tissues with expression pattern of TS genes.** Tissues were hierarchically clustered with average linkage according to gene expression patterns (shown in Figure 3). Tissues are grouped with functional similarities.
