# Supplementary material for: Identification of Human Housekeeping Genes and Tissue-Selective Genes by Microarray Meta-Analysis
Source: PLoS One. 2011 Jul 27;6(7):e22859. doi: 10.1371/journal.pone.0022859 (PMC3144958; doi:10.1371/journal.pone.0022859)
Supplement: Table S1 — The list of 2064 HK genes and their FPEI in 43 tissues. (XLS) [file pone.0022859.s008.xls]

## Sheet: Table S1
Table S1 - The list of 2064 HK genes and their FPEI in 43 tissues.
Entrez Gene ID	Gene name	RefSeq	Adipose	Adrenal gland	Bladder	Blood - B lymphocyte	Blood - dendritic cell	Blood - monocyte	Blood - neutrophil	Blood - pooled	Blood - T lymphocyte CD4+	Blood - T lymphocyte CD8+	Bone marrow	Brain - caudate nucleus	Brain - cerebellum	Brain - cerebral cortex	Brain - hippocampus	Brain - hypothalamus	Brain - pooled	Brain - substantia nigra	Breast	Cartilage	Cervix uteri	Colon	Epididymis	Esophagus	Hair root	Heart	Kidney	Liver	Lung	Lymph node	Muscle	Pancreas	Placenta	Prostate	Skin	Testis	Thymus gland	Thyroid gland	Tonsil	Umbilical cord blood	Umbilical cord tissue	Uterus	Vulva	Mean FPEI	CV
16	AARS	NM_001605	1277.71	1856.38	1074.4	920.682	864.313	406.254	152.533	392.727	510.603	179.308	1688	1943.09	2000.1	2381.06	1725.28	1982.5	2339.58	1702.58	817.879	2209.2	1057.07	415.544	1203.28	1087.38	941.735	1077.89	1307.02	1274.02	1444.36	1239.8	969.638	1101.7	1113.5	1550.69	625.245	733.486	1443.05	2131.81	1149.85	235.377	983.42	1031.96	683.318	1191.29	49.6906
23	ABCF1	NM_001025091 /// NM_001090	713.155	789.348	736.352	821.767	856.879	956.377	581.348	767.767	1185.01	1581.24	857.467	619.381	660.238	717.551	523.257	615.641	569.627	490.942	778.665	1030.61	1067.71	770.997	386.662	1131.54	1015.65	702.618	848.152	867.099	858.833	973.517	905.559	595.679	1167.07	798.786	633.407	1289.36	1029.89	641.616	1090.2	953.82	789.848	770.522	632.098	831.937	28.1163
25	ABL1	NM_005157 /// NM_007313	846.998	797.629	831.723	291.778	546.535	412.964	350.771	311.062	448.966	870.193	338.731	580.856	384.317	527.587	487.31	740.489	476.164	687.976	643.157	861.1	488.656	514.971	630.84	651.049	407.877	601.719	513.52	312.598	481.38	583.742	378.054	419.993	525.558	619.7	584.293	470.066	929.91	989.25	495.442	251.273	1336.69	1076.36	638.183	589.243	38.8606
30	ACAA1	NM_001130410 /// NM_001607 /// NR_024024	743.822	532.905	604.441	556.016	2911.78	1205.92	707.073	679.441	674.144	368.295	464.477	465.066	387.43	451.284	560.818	429.183	458.579	764.763	561.496	242.697	888.218	1395.96	421.379	1198.1	476.059	533.299	1767.43	3609.01	577.193	518.302	478.671	505.971	375.086	883.587	478.576	258.042	576.82	566.741	1260.44	626.298	220.102	410.134	893.947	760.209	85.067
34	ACADM	NM_000016 /// NM_001127328	2180.95	1293.45	460.366	1063.01	1195.85	579.521	198.29	444.119	904.488	374.742	705.498	779.827	724.309	777.43	1285.65	979.53	611.419	1349.19	829.933	513.125	531.936	1294.69	880.535	1134.9	857.051	2138.6	2481.49	2734.68	789.163	468.497	4373.98	916.32	264.264	409.753	1289.91	861.797	607.032	669.327	1157.95	535.872	632.378	638.66	1618.78	1035.77	74.3259
37	ACADVL	NM_000018 /// NM_001033859	2540.62	5167.21	1580.99	635.502	2567.7	1409.45	949.761	721.84	1061.08	746.419	1614.05	928.792	1075.6	795.544	894.863	1093.01	638.954	1484.54	2000.99	2615.15	1957.76	2848.89	571.672	2805.98	1223.83	2510.87	2502.9	2298.48	1229.31	974.837	4240	2082.31	2463.72	1619.49	1475.82	781.051	1031.58	1769.76	1531.6	862.55	648.964	1334.07	2529.63	1670.17	58.5383
38	ACAT1	NM_000019	3105.58	2439.21	524.344	814.134	1457.95	605.153	251.646	475.827	731.603	518.187	1100.94	1072.52	908.743	1315.41	1347.49	1227.33	1057.37	1301.71	1107.04	775.83	1172.09	1857.07	1058.33	1099.06	1040.23	4007.44	6441.1	7606.83	1138.35	819.093	7230.2	1375.89	465.906	1343.39	1360.91	2285.04	946.613	1308.45	730.816	261.507	768.934	1078.46	1042.51	1594.8	105.351
39	ACAT2	NM_005891	398.613	677.803	301.224	590.552	396.663	239.256	175.143	319.339	456.128	475.646	378.481	260.605	344.466	683.336	385.313	356.349	540.613	359.71	258.677	474.313	839.461	559.065	325.493	760.609	431.055	208.06	269.898	1361.27	530.35	310.804	125.178	373.182	233.555	691.994	683.956	615.186	621.476	301.407	533.66	294.321	302.95	302.479	1556.49	472.189	59.0141
52	ACP1	NM_001040649 /// NM_004300 /// NM_007099 /// NR_024080	469.829	1116.41	286.306	638.82	1497.14	509.288	332.798	513.172	747.908	1611.46	514.562	270.691	239.759	503.939	537.438	322.716	344.007	440.839	435.917	1016.98	424.796	385.07	597.15	393.768	342.023	336.917	428.547	500.691	391.681	319.23	443.178	304.419	432.095	319.405	483.97	982.813	915.72	263.023	589.089	3149.2	333.082	473.924	624.023	599.623	83.5554
60	ACTB	NM_001101	18483.6	18540.3	21651.9	20065.6	27000	28017	39710.8	34079.2	24161.7	22595.3	22385.3	16029.8	13090	18467.9	17867.9	13755	17037.3	21547	16706.4	12651.2	31356.4	42970.1	18490	21416.6	13779.1	11860.6	15202.2	11492.2	19480.6	24591.9	8316.32	9840.27	18805.7	25676.8	16564.9	10561.2	22529.4	18753.6	22287.2	37268.1	60080.3	21369.2	25375.6	21672.4	45.072
71	ACTG1	NM_001614	10830.1	18690.9	14220.7	18310.2	23073.9	19553.5	17815	17443.5	15877.5	15283.2	14856.7	9157.22	6469.01	12153.2	9813.75	9397.57	9789.87	12535.8	16804.9	12731.3	26102	25700.3	13323.7	19555.9	19527.3	6976.78	10584.6	8381.63	15965	15088.2	5533.16	17803.5	12575	13789.3	12329.3	8348.67	20841.3	10942.5	17273	17652.2	34866.7	15476.6	17306.2	15133.7	37.9731
81	ACTN4	NM_004924	928.044	2583.63	1014.32	167.224	280.134	617.15	1875.15	819.041	433.994	775.123	304.632	879.198	449.582	754.372	480.307	655.47	534.9	747.793	1377.53	845.275	1406.24	2355.35	559.312	1698	501.841	505.656	1843.09	286.911	1697.64	1037.93	176.168	179.17	1607.18	1239.33	1359.57	207.243	300.119	1024.74	778.05	786.317	13554.4	1934.31	1411.96	1231.94	163.83
90	ACVR1	NM_001105 /// NM_001111067	797.828	287.578	408.184	120.278	424.404	688.483	142.102	305.207	650.509	236.99	200.556	311.483	270.881	334.327	571.478	360.827	313.391	384.757	594.052	5252.52	352.921	433.662	868.417	408.21	1107.37	600.087	611.513	469.751	425.935	311.056	497.78	658.353	510.949	324.564	614.638	169.914	817.026	494.514	327.991	189.092	581.206	812.259	588.314	577.473	131.775
103	ADAR	NM_001025107 /// NM_001111 /// NM_015840 /// NM_015841	1365.62	1918.03	1447.01	3715.28	5198.59	3422.32	10806.7	3965.69	2848.99	3211.39	1876.23	1813.27	1564.91	2324.13	2177.02	1743.61	1761.57	2074.92	1776.48	2206.47	1481.83	1990.86	2252.7	1247.19	1195.77	1038.52	1436.22	1267.73	1997.68	2328.14	436.553	1434.59	1828.27	1796.6	1642.95	1149.42	2384.97	1059.53	2868.45	3662.44	1391.06	1901.39	2132.48	2259.15	71.4057
118	ADD1	NM_001119 /// NM_014189 /// NM_014190 /// NM_176801	1060.35	828.002	592.612	883.78	1144.27	547.674	1344.04	905.14	771.889	622.859	464.159	1022.29	947.553	1193.08	1188.77	1009.11	1067.3	1507.38	451.739	564.766	445.028	667.093	879.024	724.84	444.667	748.05	715.087	502.028	560.928	765.989	751.068	405.465	640.359	940.18	690.436	654.716	632.744	610.006	655.189	1915.81	935.618	772.812	722.114	811.535	37.7723
120	ADD3	NM_001121 /// NM_016824 /// NM_019903	2428.26	764.867	986.833	3090.38	2334.13	1790.23	4275.37	3855.66	5892.78	3328.33	1235.68	3016.84	1895.33	2234.72	3745.91	3299.72	2001.94	3537.34	1630.96	1349.41	1343.32	1520.84	3393.47	1057.26	914.056	1747.95	1993.41	508.753	1130.68	1857.47	439.576	1389.56	979.563	800.814	2327.85	1490.14	1761.46	1486.79	1593.21	2236.46	260.215	1202.73	2255.91	2008.98	57.7933
128	ADH5	NM_000671	2624.81	835.639	860.145	971.567	1159.52	472.064	342.017	647.493	1018.54	765.729	562.906	634.443	391.808	676.223	831.317	876.185	580.745	847.832	1109.74	786.718	784.598	1357.3	1833.11	1229.68	1035.57	1362.03	1132.17	1722.7	884.589	563.168	741.17	1012.08	686.503	1095.95	1160.88	752.765	2134.56	459.453	799.268	551.431	1382.5	1699.11	1017.14	985.887	47.4985
142	PARP1	NM_001618	454.385	633.974	525.986	1291.64	900.337	338.63	419.083	646.44	1034.81	667.97	1053.97	821.349	619.042	874.771	794.404	846.719	784.325	846.088	469.295	347.948	497.819	404.573	367.309	622.287	386.863	832.68	419.633	670.545	551.05	1098.05	802.268	613.837	720.215	625.718	350.058	844.709	556.049	478.829	1349.81	531.051	410.069	676.379	271.342	661.681	38.5824
158	ADSL	NM_000026 /// NM_001123378	529.158	737.61	286.023	1266.97	2851.47	850.948	372.261	760.772	1511.22	684.582	721.719	161.007	163.62	317.499	327.808	150.921	214.498	286.118	732.533	796.939	392.653	536.51	434.802	341.274	389.695	476.231	302.515	324.424	475.97	399.84	3390.28	675.327	336.387	394.062	440.747	528.901	1260.11	329.194	971.914	1166.51	558.072	576.606	639.464	675.934	93.4291
159	ADSS	NM_001126	340.649	333.75	475.587	532.663	865.817	1081.36	634.698	821.355	973.287	1014.43	561.707	472.103	437.303	673.554	685.849	583.972	572.52	545.435	589.403	1007.33	589.399	345.794	567.334	556.218	455.207	261.589	423.455	268.712	612.604	463.639	220.682	296.151	466.631	416.658	618.187	1075.95	599.696	379.12	633.056	504.395	504.497	605.547	350.501	567.856	38.546
178	AGL	NM_000028 /// NM_000642 /// NM_000643 /// NM_000644 /// NM_000645 /// NM_000646	1412.1	232.267	395.115	928.246	702.071	174.207	266.785	417.287	844.261	446.613	226.264	393.093	508.8	496.929	755.997	482.16	427.546	774.19	533.064	240.448	348.404	1025.53	683.291	506.886	1019.87	962.343	598.802	877.696	448.184	308.743	7038.08	394.659	582.834	486.701	990.595	272.942	459.596	423.817	619.908	325.781	1016.45	506.678	548.4	723.34	141.453
191	AHCY	NM_000687 /// NM_001161766	425.271	692.625	553.004	531.427	1280.77	517.68	143.303	400.679	317.749	288.319	793.055	414.318	223.845	422.222	476.88	414.626	414.186	408.877	788.014	1214.98	781.029	588.778	610.831	2208.77	580.457	557.926	1460.96	1599.51	724.718	520.876	715.75	633.958	923.259	1143.55	468.722	1246.15	710.657	793.642	875.083	361.176	490.126	1028.43	748.744	709.185	56.9147
211	ALAS1	NM_000688 /// NM_199166	492.819	7185.62	506.521	361.797	555.839	479.112	583.873	319.881	281.897	207.594	301.014	269.852	609.565	509.495	459.158	303.301	388.511	422.222	342.467	1097.23	578.144	1136.18	408.019	718.062	337.887	819.837	1195.23	2653.22	561.407	329.46	912.066	352.443	576.317	410.362	392.275	305.32	413.114	206.512	647.3	503.26	267.631	329.381	989.342	714.431	152.571
223	ALDH9A1	NM_000696	4245.22	2570.86	863.126	2236.36	2970.77	1118.91	1705.47	1228.62	1149.73	921.811	741.551	1097.22	649.241	868.69	1785.39	1427.29	843.87	2144.33	2575.93	1092.62	2277.26	1838.77	2055.37	4167.06	1724.97	1247.12	2583.6	2481.5	1425.83	1256.01	1713.09	1882.46	773.69	1379.44	2776.32	1813.53	1780.74	1795.78	1727.74	970.84	616.14	1225.48	3483.59	1749.61	50.0115
226	ALDOA	NM_000034 /// NM_001127617 /// NM_184041 /// NM_184043	6038.15	6336.93	3477.47	2996.32	7797.86	9229.33	12012.9	5544.68	4460.8	5014.01	3854.45	4437.77	4411.4	7620.69	6799.84	5491.72	6089.1	6412.76	3125.8	7367.53	8521.4	9794.87	3881.97	14168.8	2595.39	9961.15	3496.77	719.629	4520.82	3306.26	32807	1386.26	3053.67	5224.76	3530.46	1820.8	3858.53	5611.68	5349.22	6880.35	9593.88	4301.72	7483.39	6288.1	79.4483
231	AKR1B1	NM_001628	886.147	20493.7	1747.21	1542.14	1317.82	1002.83	561.317	1048.84	1635.49	1617.86	1284.4	1374.57	1268.05	1710.34	1317.7	1445.97	1591.99	1317.9	827.464	1519.91	576.486	504.077	748.501	868.61	652.184	2294.64	4154.9	602.539	1231.09	1432.78	4511.07	886.466	5878.99	1398.3	638.397	1228.04	1716.91	1053.57	1294.83	874.121	776.861	1986.01	538.867	1892.09	163.221
262	AMD1	NM_001033059 /// NM_001634	316.128	206.439	190.621	393.58	751.171	818.022	2702.43	866.427	1021.06	1826.26	1163.82	788.086	496.573	859.522	1020.87	801.155	686.536	1088.89	536.813	880.001	921.092	477.307	502.932	1037	326.742	521.053	397.928	282.987	306.862	340.907	305.279	475.766	1194.12	2047.73	419.559	597.895	563.529	252.8	644.502	1103.06	208.229	818.043	527.983	736.924	68.5588
291	SLC25A4	NM_001151	1832.87	1900.07	622.531	1547.26	3502.68	1549.21	764.511	1033.59	1725.76	3231.07	823.71	772.538	720.154	1249.78	1497.88	817.545	1167.32	1330.47	972.375	1785.59	1172.57	1259.33	1336.95	1455.98	1010.57	1186.46	792.196	1176.3	1059.32	620.971	2069.22	1168.02	884.679	803.298	1388.91	2514.32	2463.46	568.56	1864.23	689.359	933.929	1078.41	1738.88	1350.76	48.6153
292	SLC25A5	NM_001152	2861.6	3231.89	3520.2	4792.06	12797.3	6618.08	2629.84	4121.58	5390.51	7991.93	5286.37	1807.69	2661.26	3467.53	2274.47	1674.93	2651.99	1989.27	5368.71	5673.82	8525.25	13818.3	1927.92	8454.88	4224.32	2265.55	6052.94	5263.5	5008.16	3535.55	858.877	4665.01	3962.44	3096.29	4750.69	1484.42	9476.67	2607.64	7310.61	4316.11	2892.14	3694.9	9594	4758.08	61.0369
293	SLC25A6	NM_001636	5071.45	6483.56	3601.29	8301.22	17676.6	9828.66	3347.27	6024.11	5688.61	7073.9	5768.36	2348.8	2084.29	3013.03	2327.5	1565.53	2519.56	2454.51	3943.14	9868.93	4355.94	4770.69	3771.4	5930	3486.62	2079.13	4194.83	1462.4	3316.33	4477.94	1066.86	2988.22	2707.79	3706.05	4372.95	925.378	5650.82	4219.94	7277.94	5753.56	4568.84	4618.89	8494.6	4725.29	63.1136
301	ANXA1	NM_000700	11401.7	316.094	2749.45	239.331	9512.54	9423.04	4571.24	4688.17	4972.38	8088.68	4170.3	588.697	140.045	171.088	502.443	660.036	229.8	507.038	5492.09	9069.34	25785.4	8883.66	1494.18	16379	2171.09	1770.6	693.101	180.041	6576.82	1699.63	938.233	2329.78	12026.9	2558.98	4533.55	275.724	2866.66	2176.14	7545.06	4257.69	4848.3	2912.54	6068.02	4568.94	111.364
302	ANXA2	NM_001002857 /// NM_001002858 /// NM_001136015 /// NM_004039	16496.8	5092.15	7137.56	2200.04	11537.7	15647.5	1513.24	5270.81	2490.98	2387.76	2409.23	765.82	406.651	467.084	763.033	1204.27	570.29	1153.79	8040.02	11529.5	26947.4	13862.8	4496.78	16151.3	15967.4	3482.47	2502.9	1237.89	15753.9	3347.9	2971.9	7675.19	9684.03	6489.75	11345.1	1724.07	7032.99	5167.65	6284.92	2408.56	8463.77	7371.68	15010.2	6801.51	88.867
308	ANXA5	NM_001154	6480.99	3132.33	1540.74	1134.11	6363.7	6503.13	1761.98	1961.73	1707.4	1572.48	1529.58	931.284	502.973	668.667	1651.24	1903.58	854.499	1823.76	2539.45	8875	1725.88	1030.56	2552.38	1938.2	1999.92	2097.88	1945.94	1430.67	2616.93	1699.71	1201.48	2190.44	4881.14	2011.02	3056.27	1178.7	3834.4	1796.76	2633.52	1612.25	4469.23	4056.04	2442.08	2507.91	70.8649
310	ANXA7	NM_001156 /// NM_004034	1567.55	947.815	696.84	1035.34	2149.26	1493.09	1383.56	1368.61	1623.89	2004.13	1002.37	805.741	665.631	990.725	1550.52	1046.44	822.844	1330.96	1006.65	2034.53	1075.83	1444.53	1871.11	1196.42	1016.12	1122.01	1288.55	1288.57	1130.58	952.494	1725.39	1428.8	760.954	850.994	1420.54	441.613	702.207	788.574	1338.92	3530.91	758.62	1092.56	1350.58	1258.22	42.0997
328	APEX1	NM_001641 /// NM_080648 /// NM_080649	1674.72	1967.34	752.012	1904.92	5506.55	1536.34	631.563	1581.49	2340.4	1996.28	1747.98	645.581	867.234	1286.54	1043.96	845.171	700.436	966.653	1590.14	2162.2	1159.91	740.25	1637.83	1464.48	935.262	998.717	986.955	1184.47	895.61	1174.51	627.856	290.566	664.57	880.649	1438.52	339.195	1494.92	181.416	2624.85	1527.01	1174.47	1903.72	2159.79	1354.26	64.0025
329	BIRC2	NM_001166	1190.95	1322.61	1091.11	2103.61	3131.6	2795.03	2824.05	1863	2441.55	3917.64	1256.2	610.593	728.546	1117.24	1164.27	833.728	905.913	939.489	2072.13	7240.77	1428.24	1666.12	1857.25	606.352	1530.96	850.131	843.426	586.039	1328.4	852.942	1004.01	1712.6	1152.96	812.651	1513.15	1041.37	2388.34	636.684	2067.35	6970.27	1510.48	1639.7	1135.35	1736.86	81.1449
334	APLP2	NM_001142276 /// NM_001142277 /// NM_001142278 /// NM_001642 /// NR_024515 /// NR_024516	1780.17	1252.76	1208.77	488.057	2234.22	4506.7	3735.34	1770.07	457.79	551.753	1435.16	1572.87	2662.65	2041.27	1846.87	2019.91	1720.01	1659.36	1753.33	1801.07	1161.13	1954.86	2253.51	1578.12	563.27	2168.35	2625.66	1870.81	1824.39	1195.31	476.592	646.034	2110.16	2136.12	1322.52	614.361	913.735	2728.48	770.893	1488.45	1697.87	1946.21	1000.52	1663.85	49.9983
351	APP	NM_000484 /// NM_001136016 /// NM_001136129 /// NM_001136130 /// NM_001136131 /// NM_201413 /// NM_201414	698.107	1827.95	575.591	247.163	969.759	730.078	115.791	435.415	281.739	108.953	270.885	2386.59	1419.74	2380.98	2685.21	2024.88	1923.71	2391.37	3199.17	1017.21	538.056	1822.82	1056.16	681.501	1409.49	1364.69	1934.58	622.15	852.264	534.045	404.941	1611.75	737.923	1093.62	1494.77	617.018	1085.93	1069.88	646.659	242.228	1495.38	1186.36	845.552	1140.42	66.2533
372	ARCN1	NM_001142281 /// NM_001655	1520.89	982.131	525.994	932.836	1881.21	929.228	1442.67	1004.51	1310.37	1246.89	778.383	654.101	738.338	919.708	858.971	756.499	673.009	993.282	904.929	2402.57	807.143	1477.12	1493.04	954.335	690.78	898.305	766.69	701.527	852.881	720.025	461.315	752.982	1144.01	1167.29	910.905	739.292	1010.57	681.21	1464.65	883.876	1725.32	1255.89	1240.29	1029.21	37.6928
375	ARF1	NM_001024226 /// NM_001024227 /// NM_001024228 /// NM_001658	2136.06	3094.72	1282.23	1325.92	5267.05	3401.02	6052.93	2717.82	2528.2	2862.82	2581.01	1937.87	1472.92	2228.11	2114.11	1971.24	1906.33	1897.43	1255.8	4937.41	2065.35	2289.98	3533.99	4645.68	698.195	2711.61	1774.38	1884.94	1868.86	1845.95	1907.16	805.162	3249.5	1778.01	1616.52	2698.67	1645.98	1800.41	2597.58	5313.42	2329.46	2519.48	2033.49	2478.72	48.2719
377	ARF3	NM_001659	467.616	933.381	230.707	376.481	1228.15	848.664	1763.22	668.478	421.451	306.951	326.361	2475.97	917.094	3039.73	2459.23	1520.11	2172.75	1378.73	545.315	631.258	766.516	1055.54	870.104	1125.6	578.887	406.435	726.608	289.261	510.371	431.742	110.795	284.692	350.423	298.994	631.182	589.316	586.178	377.493	698.942	620.677	312.245	618.51	996.816	836.023	79.2793
378	ARF4	NM_001660	2785.25	2826.34	1587.8	1290.01	2810.12	2456.66	1983.41	1416.94	1410.96	1940.34	2258.25	1033.2	973.43	1382.25	1685.45	1314.9	1181.44	1475.99	3510.13	4676.79	2047.33	3123.12	4109.11	2713.17	1792.98	1809.33	1595.71	2003.36	2057.41	1011.66	1035.99	4000.19	3373.4	1605.39	2358.75	1879.6	2908.95	1490.48	2273.89	3187.15	3713.94	3363.85	2086.93	2221.89	42.0949
387	RHOA	NM_001664	9119.89	4788.73	3513.55	4538.17	15219	9228.67	15528.1	8181.29	7012.03	10673.8	5963.38	3128.45	3124.59	3493.93	3677.45	4432.63	3040	5296.74	3852.3	7868.17	6269.07	6565.29	5354.42	8354.78	2574.15	4204.3	4150.75	3833.06	4687	5264.95	4056.88	3268.95	5666.73	3481.16	6086.02	3389.62	7081.88	4105.63	7495.85	9371.12	7186.98	5606.95	6963.05	5969.76	48.9311
391	RHOG	NM_001665	738.019	789.426	777.322	1329.95	3256.33	5043.87	8633	3585.01	2356.82	2654.42	1723.17	1077.17	629.487	588.264	710.379	1178.87	816.996	1280.09	606.349	1186.82	806.649	937.017	283.8	1923.94	589.62	870.107	664.414	1011.55	976.338	1810.49	806.765	644.597	854.367	780.236	522.232	445.113	1181.54	706.6	1949.24	5855.94	1075.96	698.043	682.732	1512.54	106.57
392	ARHGAP1	NM_004308	916.056	917.81	855.569	451.496	1117.84	1448.33	2104.97	853.419	533.292	397.844	546.521	742.41	309.78	458.236	486.859	781.141	550.425	475.499	842.449	631.29	880.082	465.287	930.302	2598.09	561.877	1310.34	618.789	802.874	541.355	1058.02	288.991	576.097	767.993	623.813	632.777	309.934	823.728	818.82	783.676	740.486	1628.43	923.758	832.644	812.544	55.3554
427	ASAH1	NM_001127505 /// NM_004315 /// NM_177924	2757.13	698.553	1072.15	845.787	2202.04	2604.44	2380.94	1537.28	711.295	424.302	920.471	818.379	643.966	609.43	1098.18	953.044	692.373	1288.39	1092.83	248.262	1192.93	998.834	1157	1272.32	995.357	1989.62	1576.22	742.588	1376.57	959.538	1044.95	1666.68	1393.51	1043.31	1353.21	274.016	601.459	1685.25	848.437	1525.84	560.546	917.583	864.994	1154.42	49.926
468	ATF4	NM_001675 /// NM_182810	4331.21	3996.24	2796.47	4401.68	8974.02	5876.59	2977.86	3465.76	4527.65	4969.15	4982.84	1496.28	2283.34	2523.23	2396.68	1906.46	2441.67	3079.92	3715.78	9917.17	3211.79	5166.05	2771.46	3996.14	3706.42	2524.2	2157.61	3071.12	3247.88	2823.1	6436.25	5036.18	3398.24	4429.9	2917.95	2096.41	3478.9	2910.6	3700.06	4974.64	7611.49	3067.82	3647.8	3894	45.2809
471	ATIC	NM_004044	765.729	772.306	780.252	1654.98	1675.22	506.598	369.972	914.436	1280.31	798.1	1080.96	763.665	321.621	672.782	709.712	752.453	623.607	758.931	774.397	967.437	723.318	765.46	584.298	886.062	534.102	528.436	578.983	495.042	783.347	905.367	845.779	569.213	1092.35	804.509	626.715	474.371	952.169	257.817	1280.56	716.066	554.617	936.03	644.962	778.675	38.0409
476	ATP1A1	NM_000701 /// NM_001001586 /// NM_001160233 /// NM_001160234	673.588	1868.61	1436	930.315	2863.85	1382.25	881.789	1149.07	2326.53	2219.37	999.901	2000.22	3350.93	3379.83	2556.04	1229.62	2578.68	1347.86	2384.05	2963.14	1873.63	6350.19	2299.27	3284.72	2746.49	1324.54	5879.76	960.25	2856.77	991.9	339.623	2928.35	1517.88	2230.13	2361.5	1430.82	1682.94	3599.85	1610.3	868.122	546.701	1639.92	2114.98	2092.1	58.9501
483	ATP1B3	NM_001679	2817.1	5689.57	2766.67	2035.04	9128.83	6105.04	1014.38	2145.38	2481.16	3053.86	2330.87	1234.5	1910.4	2169.28	2040.6	1582.46	1865.83	1647.29	1931.7	3954.63	8716.98	11682.5	1534.15	5822.43	4809.26	1316.23	3285.45	489.92	3161.48	1337.04	627.263	1508.29	3560.98	2197.01	6051.46	2369.65	4149.09	1327.33	3273.79	2282.52	3690.95	3087.59	6852.57	3279.96	73.2738
488	ATP2A2	NM_001135765 /// NM_001681 /// NM_170665	581.989	905.799	910.563	353.1	495.152	576.607	286.136	392.289	450.608	318.175	538.564	1535.4	1473.23	2066.42	1602.68	1335.77	1597.57	1024.78	576.501	1226.24	1129.64	934.228	1472.39	1060.8	849.352	3118.6	494.146	593.392	1078.67	458.477	5183.53	377.203	770	768.462	707.819	943.142	518.063	569.775	605.721	243.292	700.451	1131.58	863.668	995.814	85.5046
498	ATP5A1	NM_001001937 /// NM_004046	7943.4	10958.8	4547.01	10171.8	17715.1	8109.56	2996.24	5760.43	6981.09	8169.78	6148.12	4244.5	5317.16	7539.46	6504.67	3873.42	5579.79	6902.47	7123.5	6154.62	7525.96	10594.2	5811.62	9460.15	6116.21	7994.99	7970.54	5541.95	5759.12	3970.24	14365.8	6159.3	4561.8	4315.44	7700.54	4253.96	7110.81	4149.51	8711.28	6229.24	4782.61	5651.95	11070.3	7036.01	40.3848
506	ATP5B	NM_001686	5403.59	6865.3	2990.44	3663.59	10450.5	4817.08	2905.69	3254.21	3897.54	5029.63	4020.08	3599.6	5147.91	5515.51	4325.59	3500.17	5446.74	4091.98	3423.13	3448.32	5900.41	7014.28	2481.6	7181.54	2259.38	10252.4	7351.86	5472.37	4318.06	2794.93	12599.8	2969.6	2827.2	4244.3	3699.29	3560.83	6193.34	4384.04	6104.04	6898.94	3818.31	3407.82	4565.34	4932.47	44.6076
509	ATP5C1	NM_001001973 /// NM_005174	4886.53	8942.94	2652.46	4744.41	8831.3	6889.19	1835.01	3328.64	3152.58	4997.14	3340.44	2447.92	2381.15	4019.88	3854.45	2394.93	3208.47	3457.79	3269.75	2873.8	5184.51	6946.06	3705.16	4232.75	3540.93	7504.05	5278.19	3932.61	3341.43	2006.81	9579.86	3346.05	2769.68	2557.54	3781.87	1747.24	5615.24	2701.06	4634.67	3010.17	3103.01	3134.6	5875	4163.66	46.2199
514	ATP5E	NM_001001977 /// NM_006886	9953.74	3858.76	3414.76	4507.94	8636.43	7445.83	6374.62	7379.03	6948.66	11639.4	3309.67	3007.92	2057.43	4203.91	5593.88	2899.28	3272.78	8092.24	3881.09	3284.54	5947.22	11825.7	5061.97	5014.44	5524.39	4700.61	4489.58	4000.97	4844.58	3798.08	4963.98	5060.44	2266.98	3402.88	4557.6	2493.01	3892.51	2815.42	5425.18	24281.2	7062.15	5230.65	8932.9	5705.92	65.3648
515	ATP5F1	NM_001688	4518.34	4805.14	3072.45	6774.68	12640.2	6605.71	2444.02	4323.86	4541.15	6419.15	3478.46	2712.64	2171.68	3648.86	4258.43	2814.14	3125.31	4359.73	3598.45	4218.93	5318.25	7616.1	4125.26	5763.61	3034.4	6124.62	4061.43	3237.31	3697	2589.81	8447.85	3229.21	3712.18	2609.31	4939.81	3981.47	6091.08	2103.63	6049.19	3927.44	3177.84	3600.09	6404.38	4520.29	43.7207
517	ATP5G2	NM_001002031 /// NM_005176	2185.71	3742.21	1733.89	2124.41	7236.28	5347.48	2070.08	3551.97	4642.54	9217.83	2979.86	827.105	1365.62	1835.59	1977.7	1041.58	1178.25	1945.19	3293.33	3071.26	2255.87	3148.39	2889.19	3020.53	2287.24	2142.4	1537.66	2127.47	2530.31	2572.27	6195.48	1186.89	1074.17	2224.48	2644.94	964.705	2750.26	1465.53	3325.09	2497.34	2984.5	3278.25	4839.24	2821.16	59.8639
518	ATP5G3	NM_001002258 /// NM_001689	4165.79	2828.2	1943.74	1709.33	3710.73	2948.41	749.976	2091.37	2382.68	5161.44	2465.84	1552.86	1939.76	2920.59	2783.68	1646.71	2248.9	2567.74	1882.78	2265.57	3597.3	5803.68	1699.02	5193.91	2874.52	6269.6	3976.13	4981.36	2296.01	1550.23	8093.21	1159.77	1648.59	1953.01	2587.18	1087.49	3908.7	1739.36	2856.94	1700.14	2121.66	2884.2	3807.39	2878.03	52.9264
521	ATP5I	NM_007100	3110.82	1696.42	1276.2	1338.28	1474.05	1450.65	810.99	1364.53	1694.58	5038.48	1136.86	1298.67	1158.5	2090.28	2899.33	1306.73	1655.57	3637.11	1709.69	1000.7	2891.85	6309.48	1684.91	3036.57	2518.75	2838.23	2014.23	2270.63	2244.1	949.913	5301.88	1079.43	711.137	1332.86	1912.15	693.415	1403.47	1040.45	1256.35	1021.97	1822.5	1680.66	3886.39	2024.41	61.878
522	ATP5J	NM_001003696 /// NM_001003697 /// NM_001003701 /// NM_001003703 /// NM_001685	5102.7	3167.65	1224.51	1821.3	4024.06	1974	1026.54	1427.84	2102.22	4081.01	1549.31	1850.69	1612.79	2977.82	3496.69	1849.86	2274.16	3567.4	2048.29	1857.54	2848.58	5598.86	3692.7	3577.8	3082.86	4965.39	3166.93	4043.14	1845.38	1159.99	8353.79	2005.95	1743.86	1479.55	2327.35	2113.09	3903.01	1172.07	2484.28	1296.71	3410.63	2224.8	3803	2775.26	52.1732
523	ATP6V1A	NM_001690	1004.15	876.373	300.939	488.015	1937.15	2043.04	5069.95	1264.71	392.366	374.505	610.562	914.969	1457.39	2726.41	2337.4	1457.79	1741.94	1563.64	698.535	858.761	1135.48	495.214	909.923	937.508	922.915	277.823	1495.94	515.278	526.288	540.122	155.51	636.226	673.136	263.258	1072.81	445.102	573.516	328.843	1088.14	963.415	214.162	992.75	1266.98	1036.02	83.2797
526	ATP6V1B2	NM_001693	959.119	979.831	808.023	331.125	2043.13	4202.45	12038.1	3072.7	693.134	727.566	860.212	2078.04	2331.59	4975.26	2984.97	2640.35	3533.11	2863.48	749.54	1533.37	1196.24	737.912	827.232	1737.12	670.293	857.692	1676.32	561.705	1022.97	937.278	928.185	575.98	1362.37	530.876	1063.89	1858.72	672.48	484.134	1737.79	2097.66	652.843	857.737	1101.72	1733.82	111.02
527	ATP6V0C	NM_001694	578.373	1154.62	496.483	171.117	674.596	1431.91	1997.7	1043.64	821.414	782.493	771.025	1512.79	1571.39	1952.81	1462.2	1313.88	1803.89	1145.91	432.621	983.139	798.468	804.424	643.132	1983.17	105.758	826.497	1332.84	933.849	917.477	677.703	821.294	249.609	1011.6	717.912	590.1	833.413	652.568	1008.22	610.281	7810.02	934.267	792.791	823.894	1115.84	102.192
533	ATP6V0B	NM_001039457 /// NM_004047	671.913	2262.07	562.685	534.831	4680.33	4306.03	10169.6	2381.4	856.301	1021.31	1583.39	1170.19	1554.35	1962.4	1734.83	1415.53	1386.06	1576.62	824.635	1556.56	1551.69	1110.35	796.058	1833.56	140.845	823.142	1536.42	1670.11	1672.29	859.456	361.222	678.203	1849.35	1899	834.561	544.293	1363.28	954.045	1801.65	4306.37	730.791	1290.23	1279.96	1676.7	97.9538
537	ATP6AP1	NM_001183	685.931	2121	846.622	353.4	2389.77	1518.62	2668.46	942.34	913.947	719.846	1245.74	1386.29	1951.7	2077.95	1756.08	1438.4	1778.17	1310.74	998.246	1374.01	1690.8	1215.13	1338.37	3016.46	563.383	1116.71	1466.15	803.534	1965.8	912.794	440.501	576.549	2136.45	1700	955.141	706.28	844.031	1426.13	1447.99	1005.17	953	1216.28	963.033	1324.12	45.3733
539	ATP5O	NM_001697	2660.12	1872.39	1454.84	2795.87	3853.82	2431.02	898.086	1830.93	2632.78	4734.91	1679.52	1556.07	1508.56	2458.26	2339.41	1496.35	2069.77	2299.09	1891.69	1451.42	3141.08	3436.08	1415.91	3066.57	2657.84	3589.08	2129.55	1705.27	1901.01	1507.87	6300.66	1208.53	1157.85	1482.22	2069.92	1601.39	2772.06	1113.8	2170.89	1405.55	1998.45	1844.85	3217.41	2251.37	45.7861
549	AUH	NM_001698	694.178	1230.01	312.707	303.306	360.212	237.98	348.88	193.646	328.052	112.982	343.161	572.305	527.53	767.178	847.58	624.747	644.959	927.367	740.315	463.175	366.737	658.048	392.096	237.721	614.533	718.135	1370.88	415.031	401.072	235.154	694.725	633.231	579.972	740.824	377.508	191.166	417.572	614.085	263.125	684.94	124.18	376.947	427.461	514.312	52.4183
550	AUP1	NM_181575	449.446	621.054	410.195	795.445	1839.57	942.734	571.508	926.119	1000.08	887.22	675.947	301.202	340.392	333.389	492.595	271.5	257.144	559.854	373.123	680.524	567.457	1157.88	470.955	624.91	328.448	278.971	485.061	684.939	434.484	488.285	417.026	504.438	624.901	441.971	519.549	308.501	399.81	395.959	855.029	722.333	297.128	600.388	875.875	586.356	50.4752
567	B2M	NM_004048	20714.4	12728.5	17142.9	21979	23421.6	22871.7	31782.8	28461.6	21639.1	26470.6	20521.2	5853.48	3781.45	4821.72	7800.4	7503.35	4719.8	11989.2	12804.3	12552.5	17079.7	37250.5	14223.9	11611	6338.69	10401	11040	10897.3	19790.8	16638.4	10984.5	15570.7	15302	15567.3	15011.5	3501.38	14871.1	9533.68	16879.4	33941	17222.9	14239.1	21394.8	15787.2	50.4715
573	BAG1	NM_004323	785.487	720.799	915.499	596.566	1774.52	786.67	1785.86	1092.86	540.857	452.233	663.542	594.628	557.687	640.898	578.25	628.002	636.565	794.79	756.802	1072.94	960.942	762.138	401.895	1131.24	805.417	1017.14	906.207	803.535	1174.09	382.229	1384.64	1268.18	417.638	877.417	756.253	2190.72	423.718	740.506	723.666	5883.05	604.395	557.606	545.539	955.666	89.9117
604	BCL6	NM_001130845 /// NM_001134738 /// NM_001706	1735.1	264.147	340.302	160.827	1145.45	854.024	5545.49	1321.82	304.934	417.667	190.398	332.551	1474.24	283.88	477.645	495.457	274.733	412.79	670.04	3826.86	343.577	113.345	1037.05	268.258	354.468	507.757	176.329	228.882	657.239	219.103	1360.41	663.277	199.643	316.288	1394.9	194.254	498.795	152.101	706.386	1254.17	309.639	337.832	669.649	755.621	131.289
617	BCS1L	NM_001079866 /// NM_004328	327.568	402.098	119.162	298.363	325.133	169.862	150.565	261.587	527.597	310.263	480.706	215.712	408.965	436.507	366.331	308.885	310.672	373.107	462.179	178.895	655.421	191.424	268.86	730.713	500.975	583.612	395.31	427.259	424.438	562.442	463.463	328.503	325.601	473.556	319.785	203.943	261.752	403.789	460.546	294.93	346.226	453.987	346.598	368.774	36.0913
648	BMI1	NM_005180	1047.29	438.07	393.689	1342.7	2178.57	551.209	368.164	889.601	1633.94	1386.69	1157.84	796.129	764.636	939.796	1415.61	768.906	761.212	1161.19	1142.42	670.545	395.913	741.635	1669.32	319.715	1225.38	490.748	373.644	281.593	556.133	537.482	772.284	891.908	736.605	466.045	1073.72	512.527	1093.76	214.865	899.44	670.569	413.709	790.566	631.829	827.154	51.2078
665	BNIP3L	NM_004331	4568.72	1218.71	785.805	926.723	2023.84	2834.68	5706.61	2651.09	1525.02	2018.99	1225.93	1127.11	885.299	1750.64	2011.02	1328.52	1450.19	2135.31	1503.65	3641.36	1375.94	674.271	2517.09	1314.92	1235.4	1000.94	1290.29	746.627	1041.5	717.196	570.838	654.842	1176.81	749.869	2141.96	1291.35	1744.9	531.524	953.758	33000.7	4237.11	1548.32	2248.81	2420.56	202.495
689	BTF3	NM_001037637 /// NM_001207	5698.79	5233.6	4696.17	8203.78	9530.14	7709.29	4042.84	6606.78	8242.94	13023.4	4901.54	1777.41	1982.66	2818.47	2798.69	2262.93	2212.69	3410.19	5843.35	7948.27	7110	6269.68	5954.51	7238.99	5152.14	3222.54	2926.53	3687.88	4285.12	3835.64	5958.44	3390.04	3513.17	3409.65	5953.05	2217.43	4582.8	2529.68	5443.85	14026	6421.68	5276.92	8508.25	5345.53	50.8745
694	BTG1	NM_001731	4707.1	2826.22	1949.92	7898.77	4755.82	7059.12	13201.3	7975.41	13012.8	16041.1	3757.11	523.302	3109.92	636.972	736.496	730.906	590.295	735.388	2478.75	6414.66	2766.86	4580.37	2702.93	2059.29	4222.84	1938.85	1763.94	2318.27	1974.88	4901.06	636.586	2187.32	1889.94	1635.34	4688.7	1107.33	4318.54	1010.32	4361.78	7346.8	4336.45	1976.28	4201.78	3908.55	89.6778
706	TSPO	NM_000714 /// NM_007311	1604	540.272	1545.42	513.171	2728.74	5023.13	3333.98	2565.5	1322.92	397.893	1636.05	150.458	149.346	161.871	252.179	349.867	214.618	246.254	923.349	1251.42	5041.61	2034.93	479.951	7340.7	1009.09	768.334	406.903	447.659	1708.35	770.383	590.647	623.874	669.263	1446.64	2372.95	146.366	674.032	979.909	1313.73	4718.92	913.55	1201.01	2580.69	1468.6	106.609
708	C1QBP	NM_001212	644.175	1124.08	324.117	1193.07	3331.02	672.651	264.842	712.487	1460.4	867.24	965.491	387.326	429.145	692.674	1114.98	574.357	588.699	915.816	592.637	1224.98	775.052	1162.79	662.931	1383.58	322.753	660.166	728.864	1038.81	609.487	556.281	1056.47	237.222	410.188	481.997	827.45	643.165	902.995	388.495	1647.35	838.906	654.702	925.138	1269.16	843.352	60.8998
738	C11orf2	NM_013265	851.025	1544.01	951.417	2596.62	3031.28	2041.97	1530.48	1779.36	2913.55	2423.14	1356.98	1050.81	1385.66	1387.29	1163.58	779.807	1042.06	812.772	1663.45	1176.04	1025.92	1848.01	760.913	2073.05	844.218	971.99	823.394	1046.26	1185.69	1574.77	1146.58	951.355	672.256	1276.94	1412.27	846.753	1018.67	1373.53	1542.37	2584.92	1397.73	1202.67	1804.35	1415.49	41.9253
740	MRPL49	NM_004927	757.698	2776.26	785.625	1086.88	931.706	1000.53	937.801	1155.77	1546.8	1833.14	986.929	710.39	663.781	821.431	805.458	728.541	695.912	578.199	1200.58	889.095	1315.41	1002.63	1130.52	2224.64	1294.29	1064.86	1434.44	1097.13	1371.19	1296.06	867.655	884.933	1188.82	1147.75	852.025	746.253	1184.13	1393.75	1181.5	590.919	741.656	858.267	984.347	1087.11	38.6426
746	C11orf10	NM_014206	2469.82	3756.72	2082.37	2398.97	3633.19	3552.73	2575.33	2518.66	3856.86	6616.39	5458.72	1474.48	1066.11	1886.65	2010.06	1985.34	1546.23	2210.51	3251.04	5838.23	4300.91	2734.9	4861.76	5280.86	4544.03	2568.88	2107.57	3152.46	3970.28	2430.79	2905.89	3203.98	2578.55	2859.87	2325.28	2091.24	5000.95	1921.73	3104.57	2225.13	2990.47	3802.17	2737.28	3113.67	40.1851
754	PTTG1IP	NM_004339	2213.86	4740.49	2934.46	1370.94	7881.52	5445.3	4955.15	2448.71	1614.24	1308.88	1832.86	1371.84	1061.82	1099.87	2053.35	2203.98	1316.21	3405.96	3141.17	6500.36	1981.52	6230.82	3417.48	2325.31	2366.89	2543.52	2950.55	2588.24	3388.18	1741.92	985.614	4779.82	6071.55	2969.8	2655.34	2292.77	1895.48	2839.03	3645.19	2682.71	6667.52	3598.95	2706.37	3075.01	55.088
757	TMEM50B	NM_006134	714.667	761.396	566.045	416.892	833.605	403.869	499.628	432.296	636.229	915.122	609.978	371.617	492.078	459.751	499.536	576.465	371.306	611.419	412.893	752.942	445.187	414.172	1503.27	567.414	351.499	563.065	464.646	276.892	524.1	456.673	385.375	391.452	282.508	471.866	574.166	798.307	909.532	631.251	505.194	211.749	399.937	553.789	535.778	547.804	40.1406
788	SLC25A20	NM_000387	828.549	444.865	507.998	518.058	991.604	602.826	488.331	625.827	424.766	394.066	727.547	401.055	369.309	271.309	333.088	473.302	358.788	420.869	366.837	107.171	459.438	810.181	224.871	618.838	447.731	977.188	735.129	1635.36	472.222	552.373	963.776	632.069	393.366	633.631	417.942	412.893	585.4	649.6	608.778	331.838	354.471	393.13	275.806	540.516	48.4325
801	CALM1	NM_006888	3364.46	1693.01	865.87	1271.14	2845.7	1725.23	3114.08	2948.93	3975.46	4453.2	1040.86	5435.54	4983.45	7631.33	7900.47	3905.8	5623.93	6224.69	1054.95	1083.54	1929.22	4695.44	4185.81	3241.69	813.81	1977.93	1673.91	1193.76	2769.3	1325.78	2905.18	1437.36	1874.21	1296.04	2084.41	1296.75	1415.56	735.516	1414.92	3413.03	3680.38	1374.9	2290.77	2794.59	65.4484
811	CALR	NM_004343	759.648	1330.54	620.232	255.051	108.071	662.25	407.039	470.418	814.155	1046.77	1354.43	501.521	417.253	468.139	575.571	833.79	487.975	414.182	657.619	1345.16	983.432	1003.43	724.478	1176.85	529.542	1173.2	1378.64	1955.05	1145.89	1130.22	289.395	328.231	1575.34	1214.13	429.458	739.148	578.783	4047.82	653.914	430.29	1334.8	1096.22	793.206	889.332	71.9957
819	CAMLG	NM_001745	1428.76	1446.19	539.591	1251.97	1810.62	1052.98	998.788	1026.06	1785.3	2226.14	843.862	764.754	971.598	1615.58	1298.79	837.168	1158.58	1206.43	1180.16	2312.88	1041.13	835.698	1871.91	834.542	2271.05	325.449	498.048	360.257	622.056	854.935	753.614	1054.55	472.377	672.847	1360.16	2133.58	1095.56	495.383	929.569	1226.22	1655.39	1089.95	1283.8	1151.03	45.0065
821	CANX	NM_001024649 /// NM_001746	2209.96	2103.97	1288.24	1214.42	3655.62	2357.34	1405.12	1740.26	1748.53	1615.46	2976.16	2100.59	1709.72	2031.64	2274.04	2883.84	1722.77	2789.54	2459.68	3845.39	2237.97	1674.36	4841.72	1788.66	1142.29	2742.47	2466.01	1885.5	1759.23	1662.22	749.211	1693.06	3299.55	1953.58	1884.29	1821.82	1580.11	1965.51	2491.09	1070.34	1892.93	2875.39	2030.39	2131.16	36.6264
824	CAPN2	NM_001146068 /// NM_001748	2931.21	855.213	1002.04	541.983	3113.47	3442.87	1307.32	1700.66	1804.94	1396.67	798.088	601.874	838.305	438.557	836.263	656.687	432.891	1187.55	1200.39	4155.26	2594.36	4212.22	1947.82	3128.91	2006.41	934.573	1524.29	256.864	2081.35	782.532	747.88	1391.27	777.258	641.405	1499.01	453.29	656.158	849.022	976.611	898.808	1564.46	1518.06	1799.78	1453.13	68.5439
829	CAPZA1	NM_006135	2615.36	1044.86	1149.12	4472.89	8917.69	5199.08	6358.97	4901.74	5072.93	5814.69	2169.43	785.287	795.947	1079.98	1602.9	1375.42	920.886	2135.31	2203.15	3035.45	3108.93	4758.47	2293.86	2844.59	3102.53	769.879	1041.25	783.097	2035.22	2100.61	650.222	2203.98	2082.4	825.698	3260.44	1753.88	3444.46	862.644	4906.52	4387.86	2295.45	2640.77	3348.01	2724.46	67.3072
830	CAPZA2	NM_006136	1393.27	565.834	505.861	808.774	3040.31	2066.04	3126.56	1598.13	1074.71	1533.23	715.858	448.985	550.31	1028.03	1422.44	629.024	686.979	950.256	776.054	1534.36	732.796	1456.4	1502.06	716.695	448.312	1267.67	841.19	476.588	685.08	603.688	1890.76	625.052	820.116	569.48	1177.5	356.132	1074.01	374.096	1321.16	1769.34	1770.96	1398.62	903.691	1098.52	57.9345
831	CAST	NM_001042440 /// NM_001042441 /// NM_001042442 /// NM_001042443 /// NM_001042444 /// NM_001042445 /// NM_001042446 /// NM_001750 /// NM_173060 /// NM_173061 /// NM_173063	2119.85	462.754	950.544	828.617	2109.01	2363.24	1075.91	1472.17	1283.81	1238.27	712.162	232.181	114.756	258.992	416.072	355.375	179.877	619.903	883.415	1074.63	3363.99	2546.64	1630.4	2782.04	1322.18	1695.19	477.828	487.688	1239.84	747.492	1008.1	552.891	1615.23	835.467	2123.86	820.937	383.721	457.72	903.957	1109.83	1143.93	868.134	2487.36	1147.81	67.6591
832	CAPZB	NM_004930	1332.12	1425.82	961.566	1236.19	2292.63	2102.11	3968.12	2464.97	2285.95	1724.79	1283	995.061	1026.84	965.01	1223.69	1137.38	1019.47	1278.32	924.632	1752.62	1684.3	2227.01	1651.78	2435.95	1192.93	1257.99	1021.69	827.572	1164.79	2160.04	1410.3	656.23	1374.81	1549.06	1504.07	1904.75	1671.02	1391.03	2006.6	1747.23	2348.34	1609.08	1476.58	1573.8	38.4407
833	CARS	NM_001014437 /// NM_001014438 /// NM_001751 /// NM_139273	1206.44	705.351	653.107	1095.03	1557.78	1622.6	1898.53	943.187	1088	1231.47	753.094	826.163	483.491	1167.4	1178.03	817.428	991.984	1181.95	907.509	2363.87	993.454	1006.38	911.127	666.559	1359.51	442.335	410.92	616.535	2101.05	661.866	492.273	906.136	746.237	627.175	892.882	861.752	1373.71	748.141	1006.58	557.969	656.094	807.828	1012.03	989.093	43.041
842	CASP9	NM_001229 /// NM_032996	181.744	1289.47	202.881	238.632	542.92	282.831	504.816	220.848	192.018	192.606	237.341	343.16	265.481	242.42	244.896	248.522	182.127	262.217	216.034	170.011	161.713	177.75	236.988	233.846	211.431	220.247	413.935	164.831	228.064	223.61	162.193	199.007	285.616	295.278	101.584	358.539	111.982	244.964	288.008	275.342	119.771	290.464	139.075	265.238	69.0538
865	CBFB	NM_001755 /// NM_022845	305.203	341.644	312.95	817.062	1782.95	1003.99	1232.48	1013.07	1554.48	1221.91	944.469	244.35	150.527	221.708	386.918	652.45	196.444	408.985	631.13	1223.97	532.229	167.017	513.074	362.35	367.918	348.687	189.18	116.864	351.632	796.324	220.819	426.582	378.853	209.924	495.855	160.617	1351.32	256.23	1043.11	485.31	217.419	615.193	368.791	572.604	73.5853
892	CCNC	NM_001013399 /// NM_005190	1988.69	743.093	716.681	1470.63	1895.17	1379.76	353.277	1078	1410.06	1669.32	1396.44	636.805	697.946	964.208	1054.18	685.294	685.006	854.164	1158.13	1755.11	1520.42	1448.45	1848.51	1392.96	1445.66	489.923	1149.51	788.545	978.856	911.249	437.493	1561.18	1185	1138.38	1419.03	340.508	1148.76	1063.89	1445.75	973.669	1078.32	1163.36	1749.12	1145.83	37.1528
900	CCNG1	NM_004060 /// NM_199246	3083.35	993.954	1185.9	1944.06	3030.79	1149.24	1009.44	1794.65	2362.29	2511.86	1415.04	503.288	358.576	584.253	848.458	790.013	383.001	1065.84	1627.22	2899.02	1013.11	1848.64	3866.96	1153.66	1263.98	1183.59	1543.46	1044.05	596.022	1185.18	3977.96	1587.09	889.265	1174.12	1350.58	389.234	1084.12	651.415	1243.11	1966.12	1265.33	1616.53	1862.9	1472.02	59.0094
902	CCNH	NM_001239	1422.44	564.184	602.853	829.613	866.16	1229.61	810.52	762.214	1265.97	3566.71	1076.64	714.278	560.204	939.945	872.451	708.237	826.947	789.884	781.602	759.616	640.795	606.776	639.873	483.131	1005.74	577.804	617.294	555.754	712.819	560.866	617.978	1052.12	340.862	634.777	503.118	2120.93	1360.88	561.469	939.066	640.49	296.08	577.555	550.092	849.915	62.9006
908	CCT6A	NM_001009186 /// NM_001762	700.593	645.746	269.095	924.361	2932.24	710.861	199.825	677.577	811.072	524.945	516.333	337.723	396.037	797.487	997.046	443.441	522.357	806.474	947.469	1517.37	836.664	922.433	661.286	669.946	832.93	302.468	427.372	297.748	601.081	354.649	527.154	653.029	521.779	413.555	1040.37	430.948	997.465	188.517	1376.99	633.47	901.383	935.143	1234.19	731.131	62.6308
961	CD47	NM_001025079 /// NM_001777 /// NM_198793	231.798	336.737	379.099	1119.75	1700.3	837.19	1284.64	832.017	1329.28	752.676	513.925	296.936	243.226	267.49	309.432	387.495	285.729	416.194	436.72	656.827	874.853	468.281	487.067	530.045	221.112	292.063	183.445	213.401	471.522	395.634	138.628	757.158	489.687	427.115	441.565	305.845	661.48	315.1	1039.03	566.44	207.118	270.603	515.709	532.334	64.6264
966	CD59	NM_000611 /// NM_001127223 /// NM_001127225 /// NM_001127226 /// NM_001127227 /// NM_203329 /// NM_203330 /// NM_203331	2397.77	1405.83	1910.24	322.379	548.057	217.876	835.212	424.444	604.484	501.545	1141.98	1326.99	1097.47	1130.47	1453.25	1755.92	1065.31	1791.42	3549.98	6203.49	3344.18	1834.21	3317.08	4744.08	1533.16	2773.96	2457.27	1031.5	3962.99	1349.97	2802.28	2503.39	6978.13	1707.01	2771.84	895.205	2611.77	1247.4	1316.25	1317.71	1526.23	2036.82	2405.79	2003.54	72.2223
967	CD63	NM_001040034 /// NM_001780	10108.7	9099.57	5886.4	728.003	4100.21	6661.52	5407.36	3176.18	1181.56	1760.35	4653.63	2432.14	1628.18	2781.11	3324.88	3305.61	2404.94	5531.98	6113.64	10696.3	4100.06	12364.2	8739.18	8538.95	2681.6	7057.8	5692.07	5316.8	8188.15	5060.23	6070.52	7522.05	11212.9	6529.73	5958.34	2982.32	7402.67	5358.88	3903.23	4674.82	11910.7	7837.8	6305.46	5730.01	51.1379
972	CD74	NM_001025158 /// NM_001025159 /// NM_004355	3957.62	5644.67	5092.21	15087.3	16876.3	14629.3	10393.8	11917.8	5685.44	6210.61	9368.86	1704.75	872.473	584.191	2163.09	2679.55	1025.12	3214.6	3160.81	122.662	2527.85	4540.62	3749.15	2249.32	533.502	3570.63	5177.59	4200.24	9625.96	18386.6	1969.32	1467.22	2513.46	4703.88	4852.42	949.379	3807.42	4686.39	16001.4	7836.81	1513.01	2483.59	4875.27	5409.59	88.6987
975	CD81	NM_004356	8296.22	4221.49	3778.64	2319.4	2024.23	1214	1501.32	1407.33	2619.92	2532.68	1602.37	3968.93	2832.9	2444.68	3816.63	4989.59	2922.88	5648.4	3825.46	5515.33	2494.74	2578.67	7681.15	3370.25	1820.06	5777.4	3354.34	8165.99	5231.84	4253.31	1293.12	3866.81	3961.51	5484.16	5096.99	3042.3	3028.81	5243.9	3803.28	1415.37	5710.7	7555.95	4172	3857.79	48.6472
987	LRBA	NM_006726	323.244	519.073	532.195	773.413	756.628	249.77	316.753	561.741	804.982	573.094	592.815	334.374	309.546	197.621	240.005	253.032	190.361	192.661	1047.53	174.262	696.156	631.823	769.749	653.663	829.694	422.574	604.018	375.577	659.205	437.384	272.802	592.228	354.89	445.003	708.078	265.406	763.185	303.032	565.403	620.871	164.181	422.493	630.838	491.427	44.6806
988	CDC5L	NM_001253	403.206	331.05	610.262	278.659	372.019	314.957	543.614	385.498	376.72	508.429	376.714	237.825	253.972	346.125	338.02	290.426	339.694	315.404	275.497	633.719	341.275	258.083	418.504	196.938	184.118	429.122	261.341	229.995	242.477	274.211	469.694	238.206	349.119	369.638	457.317	552.837	229.839	216.612	439.178	234.695	220.257	284.525	231.978	340.971	32.9687
989	SEPT7	NM_001011553 /// NM_001788	4063.18	1975.87	1825.11	6304.49	5406.19	3679.02	5719.2	4336.89	5221.89	7396.85	2285.66	5161.26	3224.9	7305.21	7325.16	5339.9	5576.85	9085.83	3581.04	4186.76	3867.38	2953.77	3076.57	2460.06	5476.93	2940.27	1464.15	882.094	2378.86	2868.73	2013.21	3914.73	2338.09	2001.91	3933.04	1569.67	4478.1	1537.32	3554.56	2694.9	6926.92	3117.74	3950.87	3939.56	48.1708
994	CDC25B	NM_004358 /// NM_021872 /// NM_021873	337.498	268.98	400.453	905.792	362.855	349.527	1100.77	1631.78	3235.11	1944.45	768.414	598.291	1207.2	433.816	368.692	456.881	396.434	389.845	420.857	638.716	432.947	268.025	251.91	414.663	340.16	339.15	296.107	372.229	537.136	1040.95	213.864	429.195	630.537	415.846	403.086	240.098	1348.16	568.41	648.698	987.098	403.139	685.578	397.102	648.382	85.7002
998	CDC42	NM_001039802 /// NM_001791 /// NM_044472	230.572	273.167	151.344	352.036	995.93	1295.56	1736.86	777.087	756.395	1283.12	392.244	287.465	535.707	782.4	549.843	384.242	549.685	377.272	209.68	383.163	426.051	293.808	313.668	308.161	263.443	163.317	141.793	100.05	157.373	241.066	136.269	144.35	208.615	144.937	388.629	123.343	230.875	106.655	464.445	852.649	208.625	269.266	491.688	429.834	83.1572
1019	CDK4	NM_000075	920.675	1239.5	810.116	642.764	694.204	388.996	151.392	530.637	672.631	465.16	1397.24	438.997	420.196	434.481	403.488	591.53	344.396	575.526	893.364	1357.31	799.911	489.804	812.722	980.896	605.349	839.232	652.549	763.633	698.389	762.092	635.912	557.041	689.73	859.202	758.254	349.045	1047.65	843.373	818.087	362.37	1013.17	1364.85	1012.1	722.976	39.9093
1027	CDKN1B	NM_004064	1570.91	1128.29	437.434	1721.78	2615.05	1140.49	2254.48	2543.98	4556.1	2938.76	1512.62	1149.69	1971.21	1542.03	2101.04	1729.47	1440.18	2636.37	1019.27	1625.71	788.853	1266.64	1321.45	856.354	1057.47	996.541	726.933	864.182	806.656	1369.48	1574.38	950.502	918.621	747.479	1595.71	698.135	1631.16	741.569	1391.17	2746.56	866.558	976.328	1402.19	1486.74	52.6354
1051	CEBPB	NM_005194	6411.74	6733.79	4617.43	651.462	2424.33	12501.8	27739.8	7324.63	1881.17	1758.75	2715.46	1165.93	274.003	815.194	1839.43	1234.82	752.879	1264.17	3708.44	7047.12	3390.93	1519.03	3054.7	2700.16	3805.16	2007.41	1799.17	6960.04	4885.67	1920.03	6375.05	2197.31	10156.3	3039.63	4254.35	527.686	2695.5	2148.58	1177.06	12696.7	4338.04	3275.83	5484.25	4262.12	110.85
1052	CEBPD	NM_005195	2823.3	4102.38	3785.75	116.307	1219.76	8529.81	17750.8	3853.75	208.798	390.734	2081.09	1442.17	489.795	622.665	1296.9	1648.15	785.312	1470.82	3963.93	9229.35	2033.15	1486.48	2562.41	3043.27	1287.26	2030.06	3572.45	4013.86	3674.83	1221.9	1727.99	2663.68	3215.3	3874.63	1751.37	466.712	1833.44	2778.72	1377.82	3660.72	9913.52	2885.79	2418.67	3007.11	105.057
1069	CETN2	NM_004344	889.954	716.318	304.354	371.145	927.965	228.061	355.446	302.143	341.245	313.019	365.39	888.829	242.435	797.28	1398.14	1064.3	619.416	1036.03	865.761	686.345	1092.65	426.404	2329.02	1118.94	979.528	471.826	684.926	227.078	3929.1	284.071	184.005	794.16	297.976	698.141	575.406	417.793	486.455	528.705	533.922	1161.81	1035.37	1290.01	724.331	767.097	83.8891
1072	CFL1	NM_005507	7921.7	11897.6	10243.4	17459.9	18231.1	21332.6	22809.1	19377.1	14424.9	12618.4	12852	12714.9	11978.7	16418.2	13093	11541.2	14219.7	14560.3	10830	8516.38	20925.8	28737.8	9968.45	10856.8	8474.34	8460.09	10127	8023.73	13884.4	13709.8	5777.15	8688.04	15323.3	15027.9	8975.04	7677.42	18355.7	9625.7	14369.6	24081.3	22145.6	11854.3	15987.2	13816.2	36.847
1102	RCBTB2	NM_001268	679.646	205.393	338.421	367.583	1142.7	1978.64	1488.44	1254.75	747.111	541.547	485.277	295.252	188.987	352.469	482.576	397.742	323.173	601.854	599.059	221.166	485.162	178.376	609.543	327.981	169.698	348.239	427.149	171.448	453.615	501.633	194.304	477.556	371.969	346.613	521.685	208.007	649.9	353.478	470.551	479.688	240.484	404.852	459.888	501.014	71.62
1108	CHD4	NM_001273	229.664	374.803	152.311	446.709	657.728	431.608	620.274	417.649	460.841	583.878	377.963	204.36	179.905	214.791	302.483	204.405	206.92	429.793	438.926	594.573	304.567	128.443	459.13	158.379	393.362	243.201	304.586	219.27	273.718	386.627	161.854	107.716	183.105	203.185	429.041	261.163	442.232	274.069	617.631	293.352	313.687	419.609	416.777	337.774	43.0252
1153	CIRBP	NM_001280 /// NR_023312 /// NR_023313	2117.76	5099.3	1291.87	3462.36	6630.27	1992.01	2787.66	2494.21	4207.81	5299.87	2137.19	1659.67	2623.8	2405.02	2157.45	1895.15	1839.25	2215.78	6463.31	3999.11	1708.45	1609.51	4792.42	2685.89	1487.6	2009.29	1765.89	761.966	2408.88	1778.84	1622.77	2884.19	1455.4	2636.97	3146.7	1483.68	3067.18	2130.76	2677.6	1952.22	2471.28	2066.25	1837.47	2633.02	50.2279
1155	TBCB	NM_001281	610.619	1140.7	478.334	610.943	2917.82	1058.5	951.278	907.802	1573.65	675.897	312.052	2122.9	1608.55	2549.55	2100.4	2413.65	2406.31	3527.78	628.801	687.493	813.53	753.61	757.454	1072.69	587.271	899.664	530.298	218.065	935.715	966.174	390.11	222.339	550.326	798.209	572.659	1131.74	1575.2	616.346	1387.62	822.778	1102.73	1112	738.802	1112.52	67.7243
1175	AP2S1	NM_004069 /// NM_021575	1171.25	1519.29	457.511	463.644	2240.25	2227.98	1008.03	1195.91	757.438	1267.34	944.995	909.322	745.329	1521.12	1335.02	954.398	1256.56	1144.44	534.879	1186.72	1676.63	1324.42	802.989	2916.54	500.926	881.676	882.187	1483.43	992.475	850.942	1005.17	174.013	874.553	1088.32	878.503	839.046	930.39	743.835	1175.16	4822.38	2151.43	1306.35	1931.3	1234.28	62.6182
1176	AP3S1	NM_001284	3197.51	1564.67	1223.34	2451.79	5274.06	2579.66	2865.14	2012.63	2263.62	2309	2188.46	2125.31	1459.67	2508.8	3410.44	2037.71	2159.48	2317.04	2168.7	3832.68	2704.67	2667.52	3697.45	3110.04	4443.89	1708.93	947.697	969.06	934.155	1718.84	1043.79	3251.07	1918.36	1242.87	3389.84	1930.9	3016.38	1007.16	2611.76	1715.23	3096.44	2171.84	2886.57	2375.21	40.2766
1182	CLCN3	NM_001829 /// NM_173872	346.676	520.71	323.551	169.641	290.74	291.849	251.751	264.109	268.066	143.404	175.568	667.404	567.013	937.423	1128.03	850.378	724.412	1305.28	546.685	299.129	935.499	731.277	994.575	554.273	420.99	488.292	357.7	207.536	346.737	214.967	283.987	381.693	403.366	336.484	605.678	383.74	240.454	133.607	368.625	741.807	129.566	338.892	712.914	474.058	60.2221
1200	TPP1	NM_000391	851.299	1407.35	623.899	933.3	4263.27	3439.03	2261.6	1610	1349.45	976.409	1444.76	1073.94	564.125	640.285	900.116	1293.42	707.642	1034.93	649.259	574.163	611.092	554.459	704.129	916.285	466.551	1023.81	1184.57	798.668	566.427	1345.98	304.137	475.976	1583.95	454.642	746.628	292.444	666.765	445.484	1861.69	1501.85	554.794	933.264	861.145	1057.05	72.3968
1207	CLNS1A	NM_001293	915.08	910.523	603.849	1163.42	3328.64	1331.86	434.437	1147.2	1681.77	969.585	1195.3	821.278	600.558	908.523	1018.17	947.995	711.019	972.24	1271.98	1381.75	1112.74	732.67	1082.28	1234.63	1972.07	607.965	471.596	643.246	888.793	733.092	933.032	1318.66	610.031	644.06	869.679	524.499	1665.86	467.978	1861.93	1166.19	624.663	828.719	1032.28	1031.21	49.7919
1211	CLTA	NM_001076677 /// NM_001833 /// NM_007096	2199.6	2299.12	1329.28	1075.68	2546.21	2730.39	1206.93	1309.89	1165.76	753.302	1343.15	1641.93	1947.65	2771.48	2591.56	1847.12	2196.58	2935.65	1874.29	2930.24	2284.01	3264.16	2177.79	2874.21	1684.36	985.834	1949.42	1362.72	2824.72	1499.38	771.457	1462.14	2707.67	1588.32	1683.81	1607.44	2405.16	1665.89	2105.9	1338.19	2000.53	2343.61	2739.85	1954.01	33.4208
1213	CLTC	NM_004859	5452.84	5640.74	3275.58	2445.28	5761.08	4138.15	3846.74	3014.42	2226.48	2342.13	3036.91	4206.79	4356.43	8309.1	6964.69	4411.28	5722.55	5993.83	4063.7	7276.45	5207.96	7216.56	6378.47	4184.97	4046.82	2976.98	4277.33	3301.55	4638.64	3122.38	2116.26	3655.89	6623.67	4052.05	4929.63	2654.31	5377.91	2863.94	4579.46	3255.5	4762.28	4921.07	6064.29	4504.49	33.6337
1314	COPA	NM_001098398 /// NM_004371	899.042	465.887	609.566	396.162	964.34	981.461	1134.86	739.14	714.924	1104.04	968.891	727.226	677.762	711.489	568.948	805.804	652.106	664.051	540.907	1887.34	818.828	264.297	831.279	1073.85	646.014	618.815	487.722	528.859	654.019	654.388	412.146	236.757	789.358	539.164	562.309	399.779	810.585	556.209	705.04	565.961	716.735	842.712	528.893	708.318	39.1278
1315	COPB1	NM_001144061 /// NM_001144062 /// NM_016451	2260.96	1366.49	1053.67	2242.47	3107.51	2143.39	2104.7	1990.28	2301.92	3784.88	1685.52	773.45	816.9	1129.02	1604.21	1094.73	813.037	1375.14	2634.3	3999.65	2056.58	2808.91	3367.39	1318.6	2461.79	1180.4	1419.61	1196.32	2037.52	1327.12	831.689	2614.15	2599.63	1495.32	2229.81	1098.74	2195	1502.21	2436.27	2028.92	2666.05	2395.24	2288.63	1949.72	40.7277
1327	COX4I1	NM_001861	3228.64	2525.16	1554.23	4411.87	6887.77	3567.56	2471.53	2682	3376.88	6897.04	1957.27	2364.32	1657.11	3471.29	3710.85	1761.19	2629.57	4865.55	2146.37	2249.14	2908.83	5148.96	2049.3	2874.79	1930.05	3453.96	2043.63	2223.38	2222.32	1733.92	4228.34	1663.74	1601.21	1687.7	2693.05	1249.4	3275.9	1426.99	2912.65	2864.28	1793.19	1651.48	4759.23	2856.08	46.7207
1329	COX5B	NM_001862	3285.43	2839.07	1716.92	1652.01	3400.58	3332.28	2778.93	2218.02	2012.34	2344.14	1945.67	2555	2068.98	3778.86	4694.86	2696.5	3242.41	4529.34	1727.71	1393.72	5369.1	6145.5	2656.37	5444.96	1311.34	6344.36	3640.1	4567	2971.9	1321.11	12188	1535.24	1366.62	2775.18	2531.03	1597.31	2356.82	3032.83	2005.21	2479.06	2058.57	2270.65	4703.05	3136.84	61.4854
1337	COX6A1	NM_004373	6684.56	5355.99	2924.32	2187.03	6716.12	5331.52	6084.53	3849.81	4717.11	9414.63	3577.63	6269.01	4139.15	9929.52	10249.2	6557.95	7670.24	12714.1	4282.8	3908.81	10789.3	12350.5	6106.71	10778.1	5337.74	1891.05	6667.96	7910.57	5648.81	2714.15	1151.34	2095.26	3372.27	3194.12	4192.01	3340.91	4187.64	3889.8	4424.77	5939.51	4614.27	4553.27	8248.13	5720.05	49.7717
1340	COX6B1	NM_001863	2625.05	2250.87	1460.92	2168.17	4622.31	3728.35	2416.29	2784.92	2744.75	6163.02	1674.41	1450.12	1248.97	2874.29	2854.76	1559.01	2049.46	2672.45	2045.66	1711.95	4366.78	5791.76	2202.07	5408.89	2953.87	3760.84	2220.25	1577.63	2869.88	1450.6	7690.32	1512.32	1245.02	1898.31	1932.26	895.984	4224.7	1341.21	2390.1	5836.74	1859.69	1930.36	4288.64	2808.23	55.3027
1345	COX6C	NM_004374	7050.13	3405.84	3589.46	2954.26	3877.89	4219.24	1641.29	3416.11	5982.61	13597	3361.02	4235.28	3351.54	7825.31	7038.97	4173.03	5322.69	7182.89	5174.16	4104.62	7083.06	10110.6	6636.47	6576.64	3507.95	7202.98	4511.31	6326.51	5391.37	3648.37	13102.3	2293.94	4746.54	4900.36	4741.75	5127.62	8207.18	3995.86	3698.49	1894	5878.05	6174.74	6223.81	5429.84	46.3573
1347	COX7A2	NM_001865	5272.4	4320.61	2168.4	3788.37	6225.35	3807.13	2362.93	3276.98	4967.53	9880.21	3093.24	3551.38	3094.5	5048.58	5646.59	2964.69	4028.27	5302.58	4323.34	3786.11	4329.44	9561.04	4196.33	5215.27	9280.07	4888.51	3757.63	3649.86	4765.96	1635.19	3929.48	8419.64	2650.82	2742.35	3699.8	7764.07	6382.52	2203.29	3515.4	5949.1	4312.9	3569.08	5154.38	4615.84	42.3407
1349	COX7B	NM_001866	4504.61	862.438	1674.62	1321.1	4329.72	3412.18	2806.84	2128.03	2836.78	7659.36	1872.35	1531.53	1321.26	3003.88	4261.08	1529.65	2370.63	4422.03	2330.67	2779.85	5482.37	9285.58	3743.89	5584.16	3882.38	6040.67	4116.21	2901.03	2633.25	1168.53	12761.7	1982.36	1719.67	1966.71	3192.08	365.842	2106.05	1759.87	2631.22	1743.33	2340.23	2627.26	6875.67	3345.78	70.9958
1350	COX7C	NM_001867	5281.08	6316.65	3611.14	5738.16	8247.26	6049.63	1989.68	4016.01	7614.8	13679	3261.03	3508.06	3051.39	5830.02	6249.27	2871.64	4282.52	6936.17	4525.33	4427.81	5985.77	10737.4	6628.94	5964.92	3618.6	7057.98	6103.1	4939.23	4958.19	3244.91	12973.7	2298.09	2165.4	3919.37	5057.82	3074.01	6301.78	3076.23	4514.93	2182.95	4702.99	4624.68	7614.56	5330.98	48.1217
1351	COX8A	NM_004074	3018.81	4289.79	2281.7	2037.27	4805.46	5051.4	3357.58	3193.84	3288.04	5022.16	2805.12	2411.99	3298.49	3564.15	3047.09	2456.14	3060.41	3281.05	2096.93	2518.73	5943.55	6055.34	2591.71	9615.59	2152.56	5880.32	4892.59	4771.36	3802.37	2367.65	9855.77	1535.32	2086.26	3612.57	2639.51	1249.95	4834	4513.01	3524.55	2590.52	2297.23	2833.21	4311.63	3694.02	48.8949
1389	CREBL2	NM_001310	1367.56	1908.48	460.983	342.916	1166.82	917.588	424.406	766.199	943.364	423.835	512.072	733.288	665.081	729.84	865.198	738.445	627.412	637.988	690.782	421.099	414.304	479.296	1172.91	394.584	847.391	483.772	771.2	531.403	614.514	667.228	261.633	787.569	520.215	516.651	934.815	464.276	523.606	522.379	1102.6	549.721	247.911	397.159	644.008	678.895	46.5108
1407	CRY1	NM_004075	360.19	214.713	119.274	109.819	585.735	137.28	161.979	312.511	1047.51	1952.93	171.039	178.337	472.516	249.779	514.497	253.884	159.323	466.379	652.004	1745.34	229.526	478.267	755.906	301.643	314.938	293.956	231.993	139.917	209.556	125.962	147.724	547.637	383.479	148.173	553.148	1183.41	725.728	256.298	295.01	596.355	1110.77	437.519	482.768	460.807	88.6673
1429	CRYZ	NM_001130042 /// NM_001130043 /// NM_001134759 /// NM_001889	761.527	472.868	569.993	872.333	499.515	239.188	130.748	355.827	572.343	288.3	280.531	213.214	121.136	334.751	511.799	479.831	254.397	340.02	744.621	446.076	805.483	248.246	1904.07	457.015	811.672	644.427	2476.43	1845.08	463.614	422.119	355.631	1887.1	275.385	658.675	808.722	183.501	1002.22	361.369	779.841	129.115	368.448	874.407	867.665	630.68	81.7729
1434	CSE1L	NM_001316	364.467	433.554	252.294	355.753	622.854	215.065	150.582	286.626	425.283	346.648	255.416	251.909	318.887	568.779	503.158	315.968	357.622	489.972	492.681	775.875	629.133	347.106	469.423	412.691	661.462	262.987	197.566	154.171	323.398	218.951	337.934	365.299	536.895	226.453	602.439	1093.44	610.534	136.818	557.433	255.897	434.885	465.657	602.746	411.319	46.0592
1452	CSNK1A1	NM_001025105 /// NM_001892	1181.62	739.741	710.801	666.422	1687.14	1274.41	1740.32	1199.9	1214.52	1284.67	819.964	618.953	956.502	917.949	1039.46	841.513	671.966	1095.22	1669.93	1894.2	2445.45	1334.91	1627.1	1504.25	1082.17	1145.64	631.901	501.96	1051.21	768.913	799.424	591.386	1087.78	1084.98	1932.32	717.719	1600.45	410.559	1261.77	1184.96	1308.87	1229.52	2015.5	1152.18	39.3145
1453	CSNK1D	NM_001893 /// NM_139062	414.497	748.004	340.152	624.446	709.302	750.344	1885.64	687.683	660.835	748.663	321.845	380.27	504.621	484.082	445.382	518.324	423.298	384.672	593.304	580.784	411.509	521.281	653.549	650.756	327.87	348.639	410.479	223.836	537.013	556.735	274.108	486.268	487.032	663.655	384.894	436.441	735.122	682.78	573.859	719.858	362.417	607.21	401.139	550.293	46.1491
1459	CSNK2A2	NM_001896	360.122	445.855	232.62	472.875	309.545	314.451	140.23	231.716	376.699	240.335	190.548	275.62	176.288	300.45	248.616	231.806	216.992	224.985	339.176	792.831	331.109	293.391	363.992	398.012	329.833	325.825	248.391	220.469	362.144	234.286	417.739	302.392	344.214	300.551	789.58	2677.12	324.396	195.166	304.111	268.047	366.267	301.076	1269.51	397.427	101.837
1460	CSNK2B	NM_001320	1441.47	2239.85	882.307	2135.65	3601.16	2497.16	2869.79	1817.97	2234.14	2183.39	1599.02	1215.9	1396.44	1610.35	1415.8	1333.56	1333.83	1535.6	1552.02	3030.07	2087.71	1850.98	2190.13	3991.68	1284.19	1467.74	1427.98	1392.39	1480.21	1344.57	1583.63	1212.57	1641.72	1114.35	1890.93	3879.08	2586.6	1258.73	2360.89	2030.32	1597.45	1777.11	2310.09	1899.69	37.8359
1465	CSRP1	NM_001144773 /// NM_004078	1435.29	1376.63	2684.9	598.8	1868.02	1008.15	337.575	645.256	716.271	578.195	903.248	3931.6	1823.53	2578.18	3855.99	4442.61	3114.97	6893.69	4564.21	608.227	1595.25	5418.36	5640.03	4898.56	2333.95	1600.31	1676.32	1327.57	1707.67	1870.99	848.991	1204.77	2383.88	7434.41	1727.28	997.513	1445.63	2241.67	993.997	473.146	35522.5	3994.69	1380.26	3085.65	173.885
1476	CSTB	NM_000100	4050.97	3312.47	4792.64	1363.27	3575.07	4535.34	2962.31	2387.86	2320.07	1836.32	1560	1907.06	1137.56	1448.35	1721.35	1868.38	1340.78	2341.77	1684.42	3472.41	33872.6	10032.5	1817.98	21516.2	3681.85	1838.79	1806.6	1708.06	4784.25	2105.16	1359	979.401	1163.34	2068.36	3433.79	1027.38	2897.49	2129.66	6414.02	2592.51	1422.35	2466.18	13853	4060.21	146.44
1479	CSTF3	NM_001033505 /// NM_001033506 /// NM_001326	408.296	331.795	527.817	681.743	409.083	355.245	241.36	398.907	631.28	251.312	527.616	456.426	378.165	560.993	468.934	489.936	381.192	396.25	670.427	594.016	663.625	338.313	399.546	551.655	1059.27	374.891	247.127	387.625	631.078	538.496	190.762	706.833	520.464	443.11	409.268	876.767	878.264	257.861	605.599	299.794	480.615	631.955	331.401	488.026	37.6181
1487	CTBP1	NM_001012614 /// NM_001328	1251.69	1368.19	633.108	1064.93	1443.69	1362.48	1903.23	2029.88	1741.14	1528.8	1025.65	1816.92	2433.72	1594.95	2039.18	1341.3	1591.8	1444.86	1168.14	1059.58	801.565	1041.2	1352.71	1272.62	510.675	1237.26	857.819	1145.36	1208.13	1194.14	1503.81	943.921	852.453	931.227	1147.51	523.99	1845.51	840.477	1168.94	1184.45	1121.51	1502.51	1089.59	1281.88	32.0217
1495	CTNNA1	NM_001903	1670.19	1593.22	1169.87	529.887	1445.69	1083.2	643.056	391.909	137.724	103.472	513.642	829.068	366.787	752.577	673.786	964.033	666.599	1168.02	1343.42	2024.51	1900.06	2097.05	1221.69	1823.03	1536.52	1407.53	1295.69	546.717	1600.01	579.854	561.968	1159.43	1514.18	1336.14	1360.51	396.651	638.315	985.882	957.32	573.227	1144	1307.09	1452.96	1057.36	48.509
1499	CTNNB1	NM_001098209 /// NM_001098210 /// NM_001904	1149.3	939.744	471.554	545.243	957.445	1094.93	1062.55	1085.59	910.349	1334.38	750.059	720.563	1201.1	1095.85	1689.78	1459.03	748.143	1162.17	1620.71	1931.08	1344.75	2098.84	2093.74	2077.83	763.355	1285.53	962.794	1063.55	1295.56	646.315	1007.2	867.453	1444.08	750.578	1221.27	585.574	739.848	708.279	754.203	875.136	3302.56	1843.19	1226.72	1183.44	45.6459
1508	CTSB	NM_001908 /// NM_147780 /// NM_147781 /// NM_147782 /// NM_147783	2261.46	1991.36	1570.52	255.432	3174.85	3893.26	1089.43	1706.02	899.793	325.619	1463.07	1119.16	807.088	1463.86	1945.77	1281.51	1229.34	1856.9	1211.8	1718.05	3087.04	2367.7	2447.29	3193.99	757.476	1820.61	3678.32	4175.74	2633.98	2201.9	855.239	1198.19	2658.2	1822.67	1591.44	300.579	1299.21	6840.96	2399.09	8605.05	1605.26	2760.96	3052.15	2153.89	73.1704
1512	CTSH	NM_004390 /// NM_148979	714.453	1091.64	3551.11	4272.9	4376.15	6777.08	657.388	2089.41	772.318	328.03	1638.49	570.002	361.324	581.938	1145.87	628.289	534.173	1056.91	1340.71	206.059	2505.06	1268.84	2395.57	1829.6	425.008	725.902	5654.13	1839	5607.48	3967.21	495.341	2487.53	853.322	1884.33	1984.39	422.52	820.237	1199.28	5584.64	904.531	310.37	1471.16	1997.89	1844.83	91.8703
1513	CTSK	NM_000396	2078.81	346.196	1380.89	203.145	302.599	497.737	214.217	240.604	356.705	415.07	294.141	296.946	378.624	199.431	218.813	311.48	289.213	174.13	1462.94	1749.71	1710.76	425.085	674.128	828.663	2130.03	573.912	312.971	424.124	372.967	884.049	756.36	935.277	653.845	761.387	5626.14	448.399	724.678	599.882	580.737	256.468	267.067	2545.44	3689.55	874.263	119.909
1519	CTSO	NM_001334	784.171	471.19	648.88	572.277	1035.3	1097.85	311.234	696.348	705.128	655.587	600.207	514.321	282.067	318.183	371.728	652.538	387.052	419.678	966.991	330.126	407.878	420.646	1864	301.046	649.924	631.587	843.319	1162.28	637.269	825.611	429.473	633.963	696.187	759.477	545.222	318.192	437.758	862.113	621.374	378.67	710.538	794.719	485.567	633.434	46.3487
1528	CYB5A	NM_001914 /// NM_148923	6395.98	1695.16	1956.5	805.787	465.501	241.493	110.114	237.822	464.342	307.279	371.03	348.179	522.761	373.925	401.874	449.171	321.198	550.42	1556.49	153.643	1199.01	1281.63	1626.46	1085.5	1445.68	827.842	4689.81	8668.88	3382.02	598.385	498.136	2618.02	635.122	1116.39	2187.13	705.275	1118.86	419.841	577.497	765.978	613.453	1106.38	4344.77	1377.69	126.052
1603	DAD1	NM_001344	2288.68	2241	657.522	1144.05	3365.59	1654.16	2178.05	1716.49	2287.6	2811.18	2172.67	1009.24	671.232	991.895	1526.48	1515.61	974.104	1703.87	1968.85	3376.35	2644.57	1798.25	3058.69	3233.72	1564.79	1575.18	1913.34	2202.17	2048.92	1383.7	1542.11	1400.44	1033.74	1132.84	1649.06	1658.07	5683.45	1127.98	2208.03	3163.86	1617.73	2435.25	1913.11	1959.15	46.7235
1615	DARS	NM_001349	1079.61	941.965	793.428	1957.75	1711.5	743.587	389.312	958.297	1581.66	1641.33	991.803	493.557	257.681	599.653	1229.17	615.881	401.266	1312.51	1728.05	2886.82	913.982	670.748	923.468	737.368	1257.43	930.779	999.241	457.443	632.985	857.983	1274.78	547.649	724.533	841.515	1046.34	313.835	944.975	603.007	1321.62	1448.53	1722.99	1109.96	1044.27	1014.89	50.2829
1622	DBI	NM_001079862 /// NM_001079863 /// NM_020548	6231.77	1498.85	1680.65	2659.62	4229.6	3252.32	1768.22	1869.7	2361.04	4648.14	1519.89	1975.51	2543.67	2479.55	4252.9	2891.72	2289.22	4033.13	4633.34	2890.91	12538.4	5081.35	2619.12	6815.42	2574.54	3280.02	3043.74	4780.98	2956.21	1896.55	3208.39	1735.01	1373.02	5072.69	5277.89	2888.09	2717.76	1436.68	4039.15	809.802	1640.25	1603.93	7745.84	3368.48	62.9661
1633	DCK	NM_000788	265.052	159.431	188.361	1230.16	1937.63	340.111	334.93	977.13	964.002	523.977	287.704	267.704	197.607	388.994	635.005	251.28	325.521	407.659	166.762	142.107	116.581	405.529	309.624	113.886	239.576	118.744	105.551	117.837	154.7	362.939	124.258	196.475	157.16	102.449	429.168	132.872	692.356	140.911	1698.62	2414.01	299.889	199.172	443.887	443.426	114.519
1635	DCTD	NM_001012732 /// NM_001921	574.186	807.269	376.407	444.723	1022.91	447.517	277.904	347.086	629.676	453.349	472.9	248.179	130.152	349.707	335.18	311.111	245.388	345.059	468.252	1221.13	554.821	227.106	450.976	660.913	198.35	345.38	383.38	565.592	356.572	546.763	179.979	319.301	330.811	342.088	464.963	191.753	644.474	654.776	615.046	267.124	288.896	635.689	481.42	446.843	48.6237
1642	DDB1	NM_001923	1165.27	3665.49	1116.98	881.009	859.5	777.153	545.383	796.819	842.961	867.752	1218.18	1154.82	1118.89	1116.3	1399.7	1207.36	1199.25	1192.69	950.464	1286.3	1188.65	958.631	1461.63	1301.89	1115.05	1313.51	1494.54	1418.47	1307.49	873.043	1388.49	846.593	3764.94	1203.09	1143.83	1628.7	1381.27	1218.28	1021.42	4571.93	1068.85	1124.99	940.198	1327.86	58.7919
1650	DDOST	NM_005216	1168.31	1960.55	1140.07	1363.36	3723.97	1935.09	1109.55	1657.33	1576.18	1522.89	2385.83	487.481	489.763	706.539	692.887	700.447	513.531	619.357	1422.18	2430.62	1369.58	1274.42	2646.96	2320.4	793.492	1099.03	995.52	1406.89	1348.02	1412.49	649.113	1043.26	2751.75	1186.79	1229.92	1196.81	1589.53	1136.23	2086.22	1045.59	1455.63	2143.39	1641.18	1428.56	48.1118
1653	DDX1	NM_004939	2298.77	999.805	613.738	1151.94	1683.69	541.266	284.56	654.179	1147.18	1036.72	1042.53	1128	1219.43	2538.63	1896.32	1109.1	1653.91	1568.82	1524.62	2057.44	2097.73	1521.58	1366.68	1334.56	1517.94	1679.97	902.406	474.902	1139.97	586.534	2611.04	1167.82	1291.68	1029.9	1806.2	993.041	1000.84	372.541	1303.21	571.693	1170.74	1305.64	1814.65	1284	43.0981
1654	DDX3X	NM_001356	703.512	331.022	239.125	471.848	1351.52	908.661	2433.04	1026.85	1402.04	2066.72	783.872	283.418	302.125	426.998	519.482	391.724	263.311	634.423	518.35	1219.32	785.372	605.59	881.573	678.04	180.782	506.683	353.593	345.528	273.817	514.802	342.858	160.89	719.955	222.324	993.178	819.747	395.944	170.66	1011.97	2493.78	585.06	770.324	588.387	713.447	76.9359
1655	DDX5	NM_004396	6323.3	4793.5	4064.49	13472.4	18127.8	8453.35	10565.5	9270.19	12108.5	14668.8	7602.91	2874.23	3204.36	3496.97	4998.5	2735.41	2749.64	5589.18	6194.98	6511.12	6822.21	6610.98	8043.61	2788.89	3290.63	3417.72	3966.73	3261.54	5651.06	5912.67	2758.95	7451.57	3629.12	4790.6	6587.23	3727.14	6452.61	2974.44	9541.79	10864.1	6770.56	6540.25	8661.67	6472.58	54.2475
1657	DMXL1	NM_005509	755.91	119.248	119.614	1393.19	1468.12	423.361	194.414	326.846	436.219	208.739	205.247	338.501	394.585	631.789	922.188	481.157	393.782	986.78	478.315	324.061	379.182	549.141	691.415	176.815	654.691	223.138	472.917	130.018	304.936	349.128	156.056	655.154	206.6	1373.75	761.215	143.908	587.119	157.633	1155.64	288.697	387.239	344.68	624.765	497.114	70.8052
1662	DDX10	NM_004398	375.211	351.965	434.347	561.899	502.054	332.756	143.474	312.433	384.084	453.874	491.289	453.478	451.054	583.504	453.05	391.3	536.863	270.046	472.695	708.813	518.648	257.829	339.489	355.913	523.548	376.187	573.314	290.642	405.574	358.963	374.372	373.814	313.481	388.773	328.604	711.009	527.348	440.765	451.581	206.99	453.855	447.533	341.433	419.159	27.7765
1665	DHX15	NM_001358	1444.61	1256.46	1389.37	3078.62	4510.69	1884.88	2037.12	1899.81	2840.24	3183.77	1663.55	824.339	1213.9	1367.25	1443.64	999.297	908.725	1321.1	1942.01	4818.91	2010.47	2354.27	1951.13	1288.54	3039.53	1063.16	1003.04	747.796	1222.79	1307.13	705.658	2021.36	1883.19	976.818	2185.38	1223.47	1913.87	718.86	3042.6	1704.66	1084.29	1996.61	2109.84	1804.25	51.2401
1666	DECR1	NM_001359	2580.73	1936.11	684.885	908.305	3213.24	1579.62	1562.94	1250.24	1111.42	594.459	611.514	442.259	208.765	425.798	676.209	465.161	320.46	611.714	983.788	572.692	1145.32	1630.22	974.52	1098.14	1059.42	2448.23	1683.53	3309.99	1061.3	501.03	1923.79	1024.76	332.031	524.975	1134.23	1158.61	1646	647.801	1183.75	949.115	550.12	817.41	1285.87	1135.59	63.9306
1727	CYB5R3	NM_000398 /// NM_001129819 /// NM_007326	8058.14	6486.03	2189.51	864.134	3040.73	2023.32	1627.25	1460.15	1164.36	1395.46	1420.8	1888.59	1518.98	1590.79	1958.42	2457.7	1716.43	3438.24	2154.66	3922.94	2340.22	2499.74	2277.56	3846.18	2025.06	4391.32	2859.02	3114.26	2566.04	1800.63	2426.96	1687.83	1706.38	2682.27	3651.14	2645.34	1732.76	2160.09	1827.35	3587.57	8077.73	2887.99	4875.75	2745.25	58.4676
1738	DLD	NM_000108	3297.89	1573.64	883.577	1133.98	2838.58	1284.96	926.597	1076.46	1282.09	2271.45	1032.34	735.065	573.495	1212.73	1446	896.593	903.814	1499.9	783.359	1215.48	1100.82	1943.76	1236.23	1430.4	823.156	2543.15	1544.06	1070.72	868.708	582.849	3507.27	942.896	943.735	711.984	1577.45	717.611	907.317	511.44	1546.63	892.257	900.029	1093.02	1933.64	1306.91	52.6741
1778	DYNC1H1	NM_001376	1295.86	1778.26	1155.09	621.299	2257.92	921.233	628.727	670.276	916.761	1728.64	324.41	1740.55	2678.49	3975.98	3122.88	1965.97	2664.85	3328.48	1076.77	1635.7	1034.69	1628.92	1064.25	1491.71	1177.35	1104.41	804.348	215.652	1125.35	701.994	1060.05	262.433	1057.27	1265.92	1449.19	1139.51	769.696	841.91	1006.42	358.804	1385.65	1601.27	1781.35	1367.82	59.7292
1781	DYNC1I2	NM_001378	2452	1959.12	1010.28	1093.97	2107.08	1350.49	474.034	961.844	935.478	470.821	836.143	2213.86	1296.38	2797.15	2900.98	2775.86	2366.86	4211.14	1536.86	2868.65	2545.51	2346.11	1969.09	2409.9	1902.5	1589.67	1490.55	760.812	1309.2	973.663	1070.53	1952.97	1457.02	1197.85	2077.53	1739	2178.47	925.715	1785.75	962.749	1838.55	2045.21	2235.26	1753.08	44.003
1798	DPAGT1	NM_001382	313.671	430.796	384.11	334.206	603.817	278.138	177.843	352.961	406.634	235.446	493.464	306.381	255.984	274.495	290.052	243.362	296.345	242.54	477.018	361.257	468.797	436.592	365	661.458	480.259	330.659	399.703	396.919	467.801	323.779	238.496	472.619	356.104	401.363	246.794	206.331	419.489	252.031	510.849	219.496	321.416	423.966	326.627	360.118	29.8131
1808	DPYSL2	NM_001386	3333.64	2930.44	996.595	641.998	10227.7	4023.75	515.009	2121.73	759.606	221.005	437.905	5800.92	6166.28	9137.22	9759.36	6185.22	6787.48	12178.1	2217.37	1580.93	659.138	1388.96	1743.23	993.833	2604.32	2944.08	1298.93	340.618	1351.58	1402.87	909.296	2100.32	1079.7	844.851	2985.77	516.817	2100.07	452.071	4149.87	642.2	1751.63	2198.17	3172.12	2875.64	102.699
1843	DUSP1	NM_004417	1055.07	3276.61	2965.21	802.997	6754.14	8908.99	18932.1	3760.14	3143.88	4938.2	7678.74	485.63	549.98	418.056	536.657	474.913	407.798	720.38	2379.06	2895.33	8425.2	1398.02	3648.4	5304.7	221.355	1892.01	1916.11	2788.25	1965.71	1890.65	623.079	1366.94	2452.81	3871.12	1314.55	723.982	718.713	1120.25	3423.61	5498.85	5742.18	3136.86	2225.12	3087.26	108.596
1854	DUT	NM_001025248 /// NM_001025249 /// NM_001948	1429.01	952.041	866.592	1335.44	1732.34	731.954	748.494	1351.52	2132.98	1094.55	1688.09	926.614	968.382	1085.7	1145.43	871.091	841.345	1212.72	1419.91	1117.58	1236.96	1035.03	2306.24	1118.04	2025.21	698.379	746.635	701.273	869.523	957.176	708.778	855.287	931.626	866.85	1535.44	883.872	1298.54	870.77	1477.44	1277.14	1826.05	1642.68	1718.98	1191.62	34.6348
1892	ECHS1	NM_004092	4643.07	3008.28	1990.84	1515.31	2671.29	1417.02	448.944	924.204	1023.93	414.917	971.106	1054.15	965.227	1640.22	1578.82	1109.82	1356.51	1502.13	1718.3	882.707	1988	3401.56	1611.12	3431.04	1203.99	2052.57	6268.51	11435.7	2152.84	1069.14	3185.42	1531.17	1224.51	2913.02	1455.55	1297.37	1156.7	1657.12	1734.25	876.87	1421.89	1988.01	1626.6	2035.34	90.1947
1912	PHC2	NM_004427 /// NM_198040	914.394	1054.23	927.92	123.352	878.212	1007.95	9874.14	1408.68	583.338	502.136	419.605	561.405	976.134	819.442	923.093	708.548	577.825	1128.27	697.259	1924.38	403.914	721.24	991.641	883.92	223.407	675.932	1008.93	634.923	928.867	598.946	334.583	322.204	995.221	865.196	640.368	1188.35	772.317	650.817	622.331	2546.6	1530.75	1462.39	628.094	1061.42	136.102
1915	EEF1A1	NM_001402	26717.1	29775.8	26188.5	43857.4	26410.3	27340.2	23871.7	31192.5	24502.1	31042.3	27674.8	13508.8	12176.4	14886.8	13975.5	13359.1	13062	18873.1	27082.9	21366.5	35180.6	32752.4	23615.1	19887.3	24929.7	13631.3	20538.3	15725.4	27145.3	22915.2	11650.2	34687.5	22734.8	32070	20023.4	13404.7	23339.1	24627	21056.1	33729.5	53337.8	21866.6	31858.4	24362.1	35.7537
1933	EEF1B2	NM_001037663 /// NM_001959 /// NM_021121	5809.58	5438.26	5347.71	16491.1	15383.6	10020.1	5103.25	10158.3	13371.3	19011	11040.5	2391.13	1977.88	3181.7	3259.96	2295.63	2817.64	3407.85	7611.41	9475.51	12407.9	6615.09	4549.06	9284.86	7796.46	2960.06	3454.67	5810.67	5517.4	9189.62	9710.4	7261.07	4048.27	4708.29	8102.05	2558.49	7944.04	3307.93	9033.04	6334.46	8031.16	6409.63	12296.5	7230.8	56.1374
1936	EEF1D	NM_001130053 /// NM_001130054 /// NM_001130055 /// NM_001130056 /// NM_001130057 /// NM_001960 /// NM_032378	1026.46	1739.12	584.624	2346.38	6144.36	2592.46	1791.27	2552.07	4747.39	7839.03	1823.51	475.418	450.869	452.571	662.057	428.41	420.445	1026.75	2130.82	3910.55	2140.43	2370.62	1997.81	2269.51	1850.5	1025.51	1143.64	1184.43	1375.41	2773.33	1751.12	1884.58	520.276	1690.08	2224.06	1173.11	2729.21	1382.7	3086.88	853.853	1833.62	1848.07	2695.73	1975.56	74.8256
1937	EEF1G	NM_001404	9373.03	12671.7	11539	18284.7	18181.5	13596.1	9903.15	14955.5	15489.7	17929.8	14203.8	3810.78	4461.87	5284.32	4670.16	4306.5	4562.66	5243.15	15716.2	13635.4	21141.1	11728.8	9832.07	15056.5	16070.1	8113.74	7485.26	8475.99	12348	12830.6	20503.2	11051.7	9097.56	12287.5	10977	6755.94	14207.5	8380.55	12283	16466.4	19541.7	11398.5	16175	11861.1	39.8338
1938	EEF2	NM_001961	9641.78	10356.4	4658.54	8098.64	9361.89	8128.91	5062.89	10180.1	9660.97	7017.25	8237.07	3963.15	5075.52	5250.86	5238.92	3794.33	4873.93	6562.29	9399.14	14346.7	6442.16	9652.39	9672.34	8628.79	4206.73	7141.8	6842.8	8299.82	6310	8665.43	10840.1	6644.49	3993.7	8318.62	8530.02	6559.65	6328.12	8144.51	7985.51	14037.1	11266.8	9159.25	11791.3	7869.08	32.3265
1964	EIF1AX	NM_001412	698.678	334.386	211.023	381.708	434.583	269.765	233.914	424.693	750.502	798.005	430.034	556.082	842.957	793.745	881.453	589.258	624.684	834.45	538.355	806.294	589.751	490.473	770.936	289.366	550.058	390.08	377.428	296.186	289.545	259.474	648.963	400.508	305.725	279.746	825.348	129.916	515.934	252.068	395.684	398.265	537.07	620.983	841.49	509.06	41.894
1965	EIF2S1	NM_004094	809.973	498.614	420.499	667.763	935.302	669.457	308.696	685.725	631.204	697.727	564.435	377.71	422.013	659.656	587.185	364.298	459.869	527.023	627.082	1162.86	855.629	669.634	686.972	647.974	794.957	453.804	333.8	336.308	480.374	443.121	589.491	496.778	493.334	433.61	704.83	680.655	849.5	328.25	845.805	480.187	654.441	579.8	966.178	601.919	31.7045
1973	EIF4A1	NM_001416	2654.85	3851.27	2962.01	3251.49	8964.14	8089.75	3716.04	4408.76	4214.07	4944.23	4775.57	1679.79	1228.66	1587.2	1478.6	1407.4	1346.84	1776.63	3346.03	7663.03	6575.47	2125.6	2213.73	7141.63	1703.42	1736.5	1909.65	2572.52	2776.99	3123.82	950.893	2373.39	3211.52	2195.91	2969.85	2287.26	4254.93	1386.67	5081.18	4320.43	4672.98	4356.21	4369.57	3433.87	57.1244
1974	EIF4A2	NM_001967	8692.04	7407.46	5395.86	10336	11631.4	6426.39	6411.09	7468.44	10114.5	12702.7	7316.05	8834.77	9680.87	12398.9	11226.5	8198.71	10104.7	9269.07	7253.46	10247	8042.62	6942.83	9084.56	5405.14	8500.3	6989.45	5742.41	4798.2	5760.5	6187.46	11131.3	9478.88	5860.78	7004.04	7029.06	4613.83	6749.57	4801.94	7075.7	7292.83	8537.9	7636.7	7731.33	7988.68	25.9942
1975	EIF4B	NM_001417	2037.97	1184.47	1119.69	1747.89	2883.55	1621.41	1583.29	2594.23	3450.67	3954.7	2142.34	973.251	1180.19	1124.19	1175.63	1093.83	1014.94	1352.09	2075.73	3407.63	1623.76	1152.31	2529.54	1618.84	2018.35	1345.73	1390.11	1203.03	1123.94	2060.32	1942.19	1084.52	1093.81	1181.11	1577.14	982.563	1428.3	981.698	1674.7	1233.38	1160.68	1446.86	1784.47	1659.42	43.0545
1977	EIF4E	NM_001130678 /// NM_001130679 /// NM_001968	406.982	136.903	196.837	243.316	352.743	294.405	270.502	421.543	552.925	766.374	326.756	323.042	307.363	501.088	598.702	465.518	362.475	699.714	369.538	794.86	524.669	568.221	650.829	589.055	407.436	323.322	294.16	234.704	251.194	241.202	289.106	273.196	310.109	204.073	461.697	291.367	396.127	117.616	417.882	248.941	462.548	475.214	463.363	392.735	40.911
1981	EIF4G1	NM_004953 /// NM_182917 /// NM_198241 /// NM_198242 /// NM_198244	664.796	842.544	246.102	355.867	472.091	453.318	349.767	414.567	353.125	379.001	630.023	313.317	346.835	400.099	441.57	459.713	385.1	588.295	394.751	800.2	859.929	433.45	498.586	893.529	252.533	585.774	617.418	964.777	420.949	519.912	973.371	232.894	657.758	461.963	480.718	828.65	432.358	639.916	571.264	429.784	486.396	672.51	572.721	529.727	36.4592
1982	EIF4G2	NM_001042559 /// NM_001418	1815.62	1260.54	963.273	2080.83	5494.85	1810.01	3088.87	1962.1	2487.23	4004.71	1120.49	762.679	765.043	1154.82	1433.92	913.56	1033.66	1683.24	1311.72	3091.98	1657.91	2390.28	2343.79	1366.94	1900.59	1247.84	1063.19	661.089	1282.96	952.019	1585.22	1908.95	1993.51	1050.22	2081.22	1086.45	1531.83	789.57	2218.9	1493.51	2080.11	2384.45	2690.05	1767.44	52.3561
1983	EIF5	NM_001969 /// NM_183004	1193.7	712.741	719.108	1295.37	2040.45	1283.7	2463.75	1244.84	1886.1	2017.18	1475.16	788.308	770.407	1408.7	1363.95	707.028	940.342	1265.01	980.736	1987.18	1000.21	854.775	1063.58	996.256	840.167	740.856	575.295	1021.76	709.507	627.046	1241.46	729.9	950.898	449.596	990.003	1603.36	1176.5	473.989	1001.53	3046.47	754.056	658.937	1208.95	1145.55	47.3498
1994	ELAVL1	NM_001419	513.263	661.831	367.586	566.95	755.949	733.843	812.842	544.423	850.848	419.756	706.39	174.504	109.787	121.385	229.763	259.129	104.783	223.365	473.325	1194.51	537.291	386.084	856.231	1026.11	397.572	738.097	429.199	794.077	471.564	700.584	299.558	302.183	596.511	408.835	572.191	871.913	1127.44	458.6	789.539	345.526	493.323	937.789	544.124	556.013	48.9329
1998	ELF2	NM_006874 /// NM_201999	287.523	143.475	182.12	144.439	411.326	230.159	812.674	326.815	501.186	475.898	236.859	188.102	212.358	203.602	228.258	225.371	140.974	212.628	310.696	488.572	308.894	205.174	461.903	161.819	167.514	291.946	182.756	228.972	196.982	279.062	329.067	155.387	265.966	292.811	434.316	552.744	227.573	175.59	219.581	353.223	520.5	434.298	236.828	294.092	47.9063
2023	ENO1	NM_001428	2034.44	2034.75	1538.13	1632.18	5470.1	3287.51	1637.64	2506.17	2656.63	2281.07	3082.3	2614.76	1548.7	2260.19	2545.38	2329.63	2029.7	2360.15	1731.01	8997.53	3989.88	2350.02	1584.85	6315.09	497.619	1380.77	3240.72	2827.88	2243.38	1971.16	725.173	778.129	1591.9	1532.2	2360.91	1739.46	3698.9	1447.26	3928.02	2448.55	4270.38	2934.07	3539.89	2604.05	58.5588
2029	ENSA	NM_004436 /// NM_207042 /// NM_207043 /// NM_207044 /// NM_207045 /// NM_207046 /// NM_207047 /// NM_207168	725.752	491.4	364.809	423.797	1645.79	362.568	907.345	497.972	737.027	524.151	407.682	484.771	661.57	1649.22	1043.34	679.356	874.441	836.074	1022.53	706.431	2037.25	725.502	1053.48	2130.98	689.174	722.861	406.591	284.48	686.837	404.926	975.599	356.007	825.388	435.092	1164.17	254.457	540.33	351.565	829.963	872.946	607.911	680.556	1476.55	780.434	56.5914
2033	EP300	NM_001429	196.754	146.473	128.941	266.8	480.703	415.577	417.569	493.309	439.078	520.365	223.27	143.765	215.302	168.938	187.303	155.438	136.696	208.749	247.894	224.946	128.555	153.163	183.08	128.614	255.989	165.579	196.848	172.793	149.515	222.999	150.933	109.637	323.511	174.262	233.266	230.625	190.418	154.879	339.625	532.143	217.85	241.046	193.174	238.753	48.5208
2060	EPS15	NM_001159969 /// NM_001981	1270.06	635.282	236.122	1425.32	1512.07	786.723	1026.56	1091.01	1216.23	1134.48	556.638	791.952	805.331	1931.85	2288.58	1018.38	1307.21	1920.97	891.443	594.953	481.664	720.849	950.255	376.745	441.87	593.723	400.739	249.544	437.357	659.9	834.484	761.945	602.031	425.462	1056.29	871.424	594.178	246.531	862.592	594.476	664.075	656.151	859.648	855.421	53.2228
2079	ERH	NM_004450	3134.86	2394.44	1453.95	2537.25	2001.47	2999.12	1762.76	2426.05	3956.81	5781.4	2764.75	2847.15	2702.81	3294.96	3719.72	3135.62	2535.03	3524.5	2590.78	3249.19	3653.17	3499.1	4548.34	3539.2	2572.91	2265.57	2628.58	2896.31	2768.37	2455.43	1972.33	2222.16	2104.24	2376.99	2596.5	3176.79	3189.72	2083.81	3083.54	1472.48	4115.54	4171.83	2584.45	2902.09	28.7478
2091	FBL	NM_001436	1152.05	1727.71	1479.65	2943.56	5748.41	1983.43	1318.6	2900.94	4683.86	4573.57	2837.66	744.097	790.01	931.022	674.606	670.448	846.105	666.798	3047.27	6085.26	2938.59	1720.34	1795.84	4203.58	2268.61	840.999	868.036	1148.45	1903.42	2398.95	1176.43	1318.94	855.536	1420.94	2487.39	1779.48	4026.98	1153.46	3095.31	2323.02	1821.36	1854.96	2778.72	2139.17	64.0674
2098	ESD	NM_001984	3641	1601.47	1170.02	1785.64	2788.14	2242.47	545.472	1812.34	1996.05	2614.47	1575.31	1235.58	1001.26	1612.71	2178.49	1592.07	1274.12	2281.43	2781.84	2031.47	2166.43	2164.63	3352.01	2629.68	3652.84	1833.74	2166.94	2492.27	1474.8	1442.31	2720.78	3062.16	868.031	1664.02	2375.22	1059.91	2579.2	1381.75	2025.97	1717.43	4883.17	2109.57	3040.25	2107.55	39.9632
2107	ETF1	NM_004730	1169.44	508.377	457.715	572.316	1858.46	1174.94	1020.65	530.297	875.447	1115.36	786.881	314.546	206.248	511.945	592.849	372.357	280.35	623.048	931.018	1715.62	1386.52	1001.95	995.072	1580.82	1643.63	709.042	505.488	334.971	748.602	398.754	603.922	590.119	1238.38	639.217	1147.03	452.989	631.762	206.279	869.5	1458.55	857.201	767.857	1108.24	825.436	51.4781
2108	ETFA	NM_000126 /// NM_001127716	2069.59	1521.96	572.16	1113.21	3892.43	1420.09	564.557	800.593	762.969	629.411	828.798	297.278	237.991	472.983	671.461	410.208	314.303	629.72	695.074	1247.91	1237.32	2461.02	597.821	1221.88	384.649	1849.22	1366.55	2985.83	561.975	501.256	2765.31	432.968	1106.38	532.309	1101.54	366.872	1044.37	255.946	1493.56	846.954	715.629	878.849	1504.77	1055.02	75.0328
2109	ETFB	NM_001014763 /// NM_001985	1886.68	1896.62	135.738	312.245	1322.86	491.612	275.451	181.336	388.27	138.416	208.28	451.755	161.35	563.724	551.686	423.017	337.099	936.373	610.377	121.719	641.574	1244.78	256.521	1527.02	341.799	1102.31	1159.91	2824.34	554.117	191.356	1089.41	274.267	292.573	390.667	516.255	258.638	1123.86	156.101	549.602	326.78	230.903	354.022	793.477	641.741	89.906
2130	EWSR1	NM_001163285 /// NM_001163286 /// NM_001163287 /// NM_005243 /// NM_013986	288.397	296.87	148.054	286.214	774.889	355.1	776.858	387.763	611.206	553.494	356.588	221.526	288.326	253.453	230.482	252.423	204.817	276.489	306.784	488.223	287.503	265.8	532.691	265.312	148.521	287.873	223.585	261.869	340.272	385.179	151.112	316.749	328.216	313.807	329.384	600.101	377.659	222.537	573.141	434.234	339.696	386.034	248.425	348.318	42.9096
2180	ACSL1	NM_001995	10756.8	365.57	353.104	189.889	774.913	2222.4	9278.08	2138.55	170.143	318.954	508.26	504.482	252.752	416.353	758.017	645.98	354.814	948.285	695.974	464.534	869.184	280.867	1132.03	760.186	1678.98	1444.35	2206.91	5709.2	506.411	435.84	2919.43	326.919	275.551	1137.43	2934.6	175.731	381.828	521.866	447.016	4681.64	258.569	456.925	3862.68	1523.77	149.46
2181	ACSL3	NM_004457 /// NM_203372	651.067	432.669	384.048	317.438	638.636	284.442	312.286	285.779	285.286	375.49	197.025	1179.17	881.385	1660.88	1689.05	1079.01	1272.59	1341.84	1499.14	2813.31	647.049	696.822	945.835	525.447	966.202	529.693	413.862	344.026	648.128	229.523	657.464	481.845	504.028	1109.55	547.306	368.469	782.072	262.235	407.499	322.856	641.166	516.708	763.41	718.413	71.1337
2197	FAU	NM_001997	6906.45	14706.3	7263.45	27161.3	22232.6	19801	14656.2	14871.9	17686.6	24668.9	12389.3	3787.41	4279.23	5376.34	5428.86	3657.07	4516.26	6301.6	11514.7	10267	15965.3	11137.1	6204.53	11138.5	10747.6	5481.71	5492.5	9328.56	9694.7	12806.5	9028.96	10475.5	5121.97	10309.7	8912.98	5166.25	13021.6	7154.08	13589.3	15078.6	11374.6	9509.41	12833.9	10861.5	51.0402
2207	FCER1G	NM_004106	902.174	408.916	554.383	157.847	7011.29	10396.3	6994.64	5175.08	563.575	913.464	1889.01	398.392	269.162	212.892	550.56	656.902	297.07	687.908	410.45	111.709	354.111	296.161	383.522	324.714	137.137	726.083	435.762	827.392	1243.32	1491.86	351.573	439.889	842.62	383.266	506.733	193.006	519.422	323.096	1643.1	8613.13	578.216	550.537	525.479	1401.21	171.171
2222	FDFT1	NM_004462	2416.24	3757.67	1258.95	2558.3	2488.28	1123.96	1576.97	1914.66	1835.98	1411.52	1119.79	1178.96	902.738	2280	2524.29	1961.64	1985.55	2456.37	2473.98	2581.26	2770.58	2621.08	1920.41	3141.22	1929.83	1341.21	1323.18	1833.2	2266.36	990.929	2644.2	2378.36	1493.33	1642.93	2060.99	2652.06	1717.79	848.996	1845.44	3534.13	1614.43	1371.28	4139.91	2043.93	36.9556
2230	FDX1	NM_004109	445.865	11492.7	224.262	466.632	1097.99	632.592	199.55	316.754	650.883	771.975	441.125	138.173	111.374	224.455	231.406	219.599	162.933	262.568	263.852	417.429	415.521	583.474	407.476	449.018	212.962	419.38	1304.34	916.099	399.764	267.546	408.045	355.201	3357.48	334.112	390.551	275.225	711.21	373.047	520.794	186.114	101.016	271.611	416.243	740.659	237.014
2280	FKBP1A	NM_000801 /// NM_054014	948.679	772.733	504.128	363.512	711.436	1210.03	2612.68	1175.96	671.755	622.445	724.361	1561.1	370.193	820.899	971.697	782.339	730.916	416.34	420.637	832.109	779.525	839.985	1016.38	1410.25	681.721	841.123	674.673	505.863	500.018	1130.7	382.404	196.896	1131.92	618.167	732.698	484.304	615.236	1074.02	936.734	1591.62	934.698	1088.86	705.797	839.478	49.9032
2287	FKBP3	NM_002013	1194.83	816.109	339.504	1246.75	2086.83	621.403	366.383	817.528	1066.43	876.286	640.596	858.996	765.815	1530.09	2015.12	790.418	1143.61	1848.36	774.465	917.347	994.673	1172.68	1026.45	967.667	1277.45	855.111	566.351	632.028	577.091	473.659	4579.93	688.774	592.093	723.701	1025.2	1137.4	1527.47	529.349	1055.84	706.212	933.85	1081.32	1472.67	1053.81	64.6396
2309	FOXO3	NM_001455 /// NM_201559	1419.57	3438.82	1193.53	760.871	1240.51	2116.92	5786.75	1791.31	884.132	1066.28	1716.23	727.158	1820.12	1595.89	1176.4	500.159	1057.37	921.346	3526.33	2812.27	1500.84	1754.05	1001.48	1175.8	1990.56	721.073	826.607	700.832	1428.27	398.351	1433.38	647.898	822.397	1166.72	1410.96	615.706	2274.81	393.665	597.35	13587.1	1749.58	837.832	1571.68	1724.63	121.641
2316	FLNA	NM_001110556 /// NM_001456	1414.23	445.496	2220.94	542.954	1365.57	2417.25	1595.23	1687.63	1005.96	846.586	547.315	186.843	194.848	185.198	184.045	429.671	149.81	291.117	666.861	1087.08	554.234	2868.24	2144.86	2575.02	227.019	708.995	564.377	191.072	569.03	1715.09	234.843	122.538	665.909	3292.68	941.284	434.652	458.395	828.33	867.585	901.559	13899.7	3298.2	1162.38	1318.39	163.075
2332	FMR1	NM_002024	632.298	228.663	268.958	387.411	583.9	587.739	1152.05	912.454	733.423	674.208	285.911	596.054	985.58	1026.29	1122.33	717.941	758.834	1018.15	581.101	892.449	404.727	710.192	1644.68	338.35	624.966	416.627	658.858	277.51	454.728	446.398	137.663	379.296	1454.71	331.195	791.144	331.282	770.763	365.049	392.898	638.25	1191.28	697.467	681.101	657.788	50.5457
2339	FNTA	NM_001018676 /// NM_001018677 /// NM_002027	2618.83	742.587	786.323	2070.82	3530.66	1795.22	1587.25	1814.66	2076.48	1717.31	905.616	851.798	685.047	1220.17	1406.82	1124.61	916.355	2494.1	1355.45	2940.54	1660.45	1499.81	1684.86	1164.22	1694.62	898.673	656.406	516.229	1183.76	1254.81	1431.48	1031.49	1458.95	1169.8	2081.23	905.542	1201.05	835.608	2144.85	1282.47	1347.22	1462.3	2540.92	1482.5	44.128
2495	FTH1	NM_002032	12817.3	6761.02	3375.84	3177.01	17170.1	17737.3	19538.8	9018.72	4154.28	6387.09	4384.1	4775.71	2021.21	5892.03	8320.98	5956.69	5374.89	12320.7	7936.89	12376.9	1479.69	23881.5	10274.6	7547.26	2198.61	4402.38	5466.37	5023.19	6808.47	3350.89	5321.23	3381.2	3110.94	3717.28	5098.11	1972.21	4849.2	3653.52	5741.34	23324.4	6438.06	6336.76	6473.56	7426.7	74.1946
2509	FTHP1	---	16248.5	11481.6	7053.76	7886.1	20709.3	19053.3	24655.9	13945.2	8969.11	15179.5	9408.61	8992.26	5407.86	8924.53	11262.2	9133.14	10148.7	16261.9	16022.1	12702.3	5732.23	28023.8	10955.4	12906.2	10055.3	7473.91	10969.8	12166.3	13626.3	8099.13	11616	14985.9	6475.23	10899.5	8282.15	4516.82	12199.5	10807.9	9839.66	34548.2	21297.3	11788.8	7144.23	12508.3	48.5604
2512	FTL	NM_000146	24300.3	16844.2	11481.8	9669.99	15625.3	25796	30659.3	19810.6	8569.73	16990.3	15406.6	9474.51	4488.03	7867.86	10384.5	10099.9	7972.95	17209	6583.76	12573	6138.57	12819.3	10086.4	8141.99	3230.06	8933.78	17476.3	23033.1	15288.9	13494.5	6246.26	10239.9	12195.2	8846.75	9597.79	3205.01	9458.52	11759.3	8841.83	40862.8	19875.6	8318.6	10464.8	13031.7	56.985
2521	FUS	NM_004960	515.93	1065.78	688.165	1471.35	3743.89	1667.77	1053.56	1647.08	1528.26	592.272	1179.19	575.688	926.412	863.8	761.337	505.286	672.528	834.991	1428.68	1364.09	813.021	975.173	775.96	488.553	674.182	475.986	652.198	381.281	1021.53	1105.71	753.317	889.001	685.062	1247.21	994.206	970.443	5228.97	957.365	2321.77	663.649	801.542	1175.96	547.711	1108.97	77.9396
2534	FYN	NM_002037 /// NM_153047 /// NM_153048	1504.29	395.575	241.716	444.235	2277.45	2210.27	1701.62	2571.33	5146.85	7885.42	373.671	1342.37	1259.35	1670.88	1892.42	2048.65	1343.67	1998.98	194.112	1044.52	126.787	260.911	1194.78	122.013	182.144	545.54	487.188	519.67	209.116	1571.87	146.437	233.734	308.15	135.075	904.186	338.964	895.166	367.263	777.971	1675.96	1868.69	733.981	816.242	1208.59	117.147
2542	SLC37A4	NM_001164277 /// NM_001164278 /// NM_001164279 /// NM_001164280 /// NM_001467	390.658	358.816	224.953	308.997	1075.25	528.266	706.815	398.961	560.332	426.879	468.329	166.336	145.315	248.324	276.179	237.919	213.446	285.202	317.812	320.327	325.76	310.041	568.462	277.805	273.727	175.122	710.227	1257.34	252.227	300.578	380.751	362.25	478.518	231.484	468.97	241.917	406.439	232.476	538.177	677.501	233.439	452.675	417.223	400.749	55.6779
2547	XRCC6	NM_001469	669.259	1016.34	492.953	938.092	3419.43	897.288	797.451	757.853	1453.99	1241.02	765.095	388.528	456.127	651.473	525.736	466.798	495.831	521.72	754.562	1243.18	1016.78	711.24	610.634	1036.41	555.153	504.64	534.263	510.522	834.589	697.06	671.31	536.065	744.653	752.885	686.647	1106.58	771.422	524.928	1462.11	392.902	735.024	1051.37	942.625	821.919	59.1997
2548	GAA	NM_000152 /// NM_001079803 /// NM_001079804	503.395	335.1	472.756	686.962	471.095	612.075	603.107	688.465	660.939	377.701	515.75	540.156	455.649	579.954	597.658	662.637	537.134	809.114	627.01	476.114	723.991	514.907	400.274	764.978	917.498	563.227	440.518	374.943	467.92	411.378	842.324	583.554	438.95	454.15	362.468	314.759	784.284	442.119	554.598	514.31	350.291	512.974	500.864	545.303	26.3171
2580	GAK	NM_005255	266.661	806.319	427.253	911.953	1534.69	1502.15	1552.8	863.1	1131.72	801.856	532.659	336.467	714.227	594.727	610.447	344.363	423.228	473.686	664.955	437.805	751.898	1449.28	422.69	993.352	365.988	205.733	686.15	294.784	806.188	724.967	155.661	477.584	469.988	392.247	568.744	1065.96	496.448	481.081	1020.53	576.986	334.64	652.404	565.852	671.866	53.0898
2589	GALNT1	NM_020474	670.995	392.374	761.905	642.473	1260.61	1125.89	965.3	794.986	722.092	1071.24	649.089	359.718	287.88	372.244	395.812	346.056	299.331	340.483	1123.61	1374.73	1507.22	969.102	550.986	1296.75	974.764	459.374	291.292	322.52	516.624	485.52	596.99	827.379	951.059	423.303	1308.38	298.702	783.14	455.899	993.277	632.719	512.139	805.485	766.592	713.629	47.7474
2590	GALNT2	NM_004481	380.476	782.606	319.056	213.206	1175.93	560.819	307.845	272.087	273.669	176.447	497.102	230.945	200.205	315.926	274.086	345.462	231.775	282.379	205.842	1595.78	244.676	243.275	380.984	517.785	349.024	291.942	291.277	717.359	264.592	273.183	417.519	306.652	440.17	299.323	377.258	349.742	713.268	211.093	605.918	254.392	521.17	404.378	259.388	404.093	66.1342
2597	GAPDH	NM_002046	8341.21	14243.6	10950.5	7899.29	13827	17762.3	9787.79	11984	10612.1	14398.1	12958.9	12358.5	11323.2	16836.7	13164	12446.8	14520.4	18943.9	7781.96	16440.3	20750	14392.7	9526.33	18866.2	4449.16	15008.9	12774.2	12025.9	10379.4	8962.63	39188.6	6794.13	8930.47	10604.1	9466.88	7729.89	15039	11460.8	12630.8	15084.5	28959.9	11878.7	15481.8	13417.8	43.8382
2617	GARS	NM_002047	1070.48	893.78	271.57	1016.64	2218.44	1571.37	568.261	914.724	1314.17	1411.5	1582.21	1299.52	1268.23	1950.5	1627.02	1250.17	1561.81	1277.81	696.447	4735.79	1921.97	1209.46	921.589	1625.85	823.057	841.278	839.894	573.222	775.316	1005.72	680.163	866.013	931.216	667.113	1209.77	1160.44	1123.9	262.405	1741.74	647.016	1491.93	1206.85	1394.55	1219.09	57.5083
2631	GBAS	NM_001483	1904.54	985.646	531.445	577.462	2685.92	1488.54	395.804	753.149	743.458	734.398	564.405	896.24	685.614	911.382	1600.38	1073.77	800.156	1331.55	943.162	906.523	436.741	924.154	1499.75	518.928	585.53	2980	915.506	144.803	879.768	407.379	6400.03	473.401	513.14	706.15	1015.49	421.173	654.871	908.97	829.573	504.768	656.338	989.831	924.058	1041.95	96.2494
2632	GBE1	NM_000158	4111.11	1786.95	352.75	866.685	1328.72	593.642	572.875	475.539	269.777	157.977	270.354	187.111	203.319	261.762	553.415	426.226	212.947	1699.86	691.666	2440.5	688.626	636.964	1106.26	642.31	904.458	1352.81	824.427	1416.81	472.99	257.264	2369.85	1312.86	679.589	360.73	1270.19	165.745	2043.14	316.257	688.298	619.761	1780.11	1156.32	878.093	916.443	85.5622
2653	GCSH	NM_004483	1947.46	749.187	365.663	258.31	526.841	107.972	100.103	163.303	286.834	190.796	532.671	1034.4	796.363	1093.45	1506.3	1317.19	1010.2	2252.4	818.027	695.151	639.18	487.67	1623.14	459.23	820.178	903.534	1503.22	2865.92	465.192	274.996	1934.42	575.796	1048.93	586.482	736.974	319.372	1017.43	1783.1	402.955	177.898	635.145	1191.99	1033.48	866.02	72.14
2664	GDI1	NM_001493	767.211	1342.46	774.818	399.266	604.413	801.443	2791.68	1017.93	1835.01	1411.14	714.069	4112.65	4878.47	5513.29	4281.49	3893.28	4670.4	2995.89	1166.96	1225.21	841.236	522.282	737.271	1266.31	1013.2	1155.84	903.09	675.068	1478.76	1193.32	557.22	713.088	1235.97	1132.3	678.587	993.15	810.46	909.045	836.832	823.924	3047.88	1488.07	461.673	1597.02	85.0382
2665	GDI2	NM_001115156 /// NM_001494	3064.33	1615.65	1533.87	3395.49	9065.76	4909.62	4362.1	3802.1	2953.85	2074.77	2766.3	1247.6	1171.03	1953.75	1500.27	1565.53	1544.1	1934.4	2743.96	4936.1	3121.24	3411.59	3431.91	3056.32	1741.61	1742.33	1683.13	2206.87	2116.47	2294.85	1420.5	1604.03	2101.42	1510.7	2880.2	1430.66	2028.25	1171.76	4838.45	2791.57	2418.57	2550.8	3055.1	2622.07	54.6375
2729	GCLC	NM_001498	806.905	276.84	708.548	323.106	1129.9	289.722	204.827	341.635	422.53	533.614	453.603	705.109	277.812	416.703	603.284	653.743	362.206	699.959	449.43	294.03	640.199	513.643	404.15	550.87	962.112	351.992	334.716	1030.15	800.66	318.81	219.939	381.154	306.613	422.675	525.719	194.934	306.407	228.566	659.725	2320.13	149.743	648.666	401.153	526.191	68.9022
2734	GLG1	NM_001145666 /// NM_001145667 /// NM_012201 /// NR_027264 /// NR_027265	834.551	1263.72	259.381	526.494	1289.59	831.576	1243.63	769.262	1123.46	1000.36	574.667	956.201	618.896	666.293	731.854	775.323	647.425	929.586	683.793	1585.63	493.34	479.11	1123.73	558.019	1108.21	611.441	1111.06	299.409	380.243	701.009	324.069	280.149	1257.18	696.531	711.955	762.76	420.191	566.146	650.696	430.365	1021	915.351	951.286	771.278	40.6363
2739	GLO1	NM_006708	2095.93	2784.86	1274.26	3129.4	3805.29	1207.18	631.856	1024.4	1435.13	1551.33	1758.18	1939.32	1123.14	2605.65	2672.31	1906.16	1985.7	2200.25	2312.1	3473.41	2881.9	1401.48	3058.83	1875.35	1898.03	1955.45	1409.64	1361.4	1717.16	1066.32	2850.8	1750.13	1371.37	3122.62	2270.08	590.953	2032.61	931.063	2117.8	861.654	1787.94	1785.43	2345.27	1938.58	39.4951
2746	GLUD1	NM_005271	779.358	773.897	332.458	382.101	1192.74	1117.27	534.202	710.231	930.87	1238.39	360.174	1738.33	491.558	1345.75	2340.75	2140.1	1234.37	2583.09	808.574	947.754	652.319	576.921	648.892	1127.45	234.182	750.347	1626.56	4722.88	429.847	509.297	168.067	226.32	522.458	924.286	743.795	259.94	477.655	356.694	680.672	465.685	330.222	630.919	512.858	920.005	88.807
2752	GLUL	NM_001033044 /// NM_001033056 /// NM_002065	6046.71	801.122	1000.59	234.472	1578.33	2342.58	12942.1	2341.96	218.062	288.816	1959.55	3553.52	2298.68	3174.64	4358.4	4451.93	2773.62	7128.6	1283.61	1120.03	3892.04	881.987	3120.91	3861.34	705.281	1354.17	652.61	2671.9	3227.65	1128.44	3040.22	1352.53	2534.69	687.698	1818.71	3758.93	1234.19	1061.86	1638.74	11466.6	2187.93	1429.06	2382.45	2697.38	96.6479
2764	GMFB	NM_004124	743.788	442.988	323.703	728.59	1194.6	777.473	593.238	519.057	666.92	571.805	387.629	965.715	987.538	1759.58	2366.79	1442.63	1257.38	2099.93	818.288	873.246	569.393	1334.18	728.307	458.982	1020.07	486.522	457.36	210.978	333.543	336.282	121.246	688.012	707.305	234.801	646.665	197.565	707.917	272.36	737.356	447.855	425.252	778.474	550.128	743.522	64.9958
2773	GNAI3	NM_006496	654.727	450.965	300.104	1083.05	2593.61	1412.49	2123.93	850.579	925.425	968.195	572.806	129.327	131.432	170.59	221.813	153.474	138.116	277.819	607.924	1528.48	1495.44	790.498	596.745	1365.15	769.028	158.813	174.575	200.045	311.479	421.008	119.446	386.919	577.168	326.591	1250.94	370.632	771.814	122.232	1194.23	969.706	685.789	745.064	1101.38	702.315	80.0222
2778	GNAS	NM_000516 /// NM_001077488 /// NM_001077489 /// NM_001077490 /// NM_016592 /// NM_080425 /// NM_080426 /// NR_003259	5181.92	14010.8	3597.48	7400.2	8333.01	6616.96	8903.55	5952.36	4231.01	7388.28	5368.67	3367.63	6255.22	8772.32	7177.34	6774.41	7340.42	7232.06	4416.12	7597.37	5056.6	3543.1	4850.93	5158.13	2093.03	5576.81	3817.57	2790.2	4718.04	4456.79	8418.22	4300.92	4678.4	4630.13	3423.95	3272.28	4630.94	9032.86	4891	14421.6	5065.94	4822.98	5241.44	5925.79	43.0297
2782	GNB1	NM_002074	1792.68	1466.01	972.092	1452.27	3982.18	2854.5	5282.73	2172	2279.33	2066.11	1452.14	2581.82	2497	3720.1	2826.58	2441.56	3026.03	2237.58	1084.74	2663.74	1129.16	1591.4	2770.3	1626.79	1234	1130.25	1111.53	949.71	1175.07	1454.66	491.568	908.191	1314.56	1123.71	1637.51	1177.38	1647.34	1169.6	2013.14	1876	1984.03	1805.31	1789.73	1906.1	48.7465
2783	GNB2	NM_005273	761.283	1450.51	600.886	522.348	1995.07	1850.88	5815.63	1331.14	962.826	401.297	661.964	720.717	522.933	658.99	721.763	626.342	574.27	583.754	408.055	833.179	902.628	952.39	668.658	1821.59	116.665	616.508	617.561	681.225	1030.41	1046.46	332.305	292.305	748.295	996.822	830.279	549.502	571.873	1014.98	1290.91	1921.87	971.97	987.925	900.757	973.667	89.3992
2787	GNG5	NM_005274	2452.67	2328.09	2193.93	2657.39	6040.59	7031.92	6429.77	3595.32	2339.69	2272.15	2929.11	1080.91	255.003	761.494	1297.71	1177.39	581.133	1254.6	2246.86	4011.7	2851.76	5703.49	2284.79	5834.06	2754.55	4343.45	1918.91	3201.67	3191.73	1916.92	4962.43	2198.81	2577.92	1470.49	1642.51	2040.72	3026.18	1888.9	3418.68	4444.7	2102.42	2205.12	3085.45	2837.28	56.1979
2790	GNG10	NM_001017998	2144.77	1108.52	878.043	768.633	3019.17	1699.74	4772.8	2071.27	1210.02	750.103	643.681	1081.75	394.6	998.998	1909.83	1207.39	710.807	1662.95	1233.04	3108.33	717.836	1318.81	1928.67	682.147	1919.24	890.954	615.706	913.699	1033.16	754.972	723.525	1855.43	1443.4	894.393	1000.06	418.318	1421.53	493.268	1510.76	3074.29	1868.37	1206.71	1051.68	1374.68	62.6694
2803	GOLGA4	NM_002078	808.119	218.327	223.391	183.632	557.975	155.115	344.513	316.036	410.686	793.284	252.121	288.104	351.107	345.843	417.342	352.509	198.001	505.508	508.604	1684.91	613.568	463.186	1002.08	174.955	200.464	546.104	332.031	386.556	242.667	166.069	656.507	185.254	905.646	237.116	860.974	509.54	225.136	150.459	203.112	251.117	538.96	508.497	877.643	445.413	67.8461
2804	GOLGB1	NM_004487	711.903	525.446	628.629	499.947	536.792	419.295	613.633	318.88	549.98	872.777	543.69	426.992	396.763	562.463	505.007	455.137	424.031	531.684	1141.4	1005.58	974.131	730.305	1048.86	457.532	905.85	496.926	608.372	387.856	921.74	435.918	271.68	850.916	854.717	1197.76	639.823	412.778	348.125	382.173	559.474	428.564	718.789	776.089	622.113	620.942	37.5012
2806	GOT2	NM_002080	206.316	2490.07	1237.63	792.2	962.199	592.043	213.525	527.464	942.749	722.326	733.803	989.646	1605.74	1976.93	1717.16	1121.36	1364.09	1386.37	1243.07	700.972	1670.93	1139.89	1069.71	2762.9	878.302	2781.36	1358.95	4327.93	1012.71	547.184	5841.6	693.57	582.428	892.529	775.344	713.327	1154.35	763.18	1031.71	458.443	508.866	780.614	1499.48	1273.74	82.2654
2821	GPI	NM_000175	2354.97	2615.92	987.556	1829.89	2158.33	1601.33	832.712	1179.44	1636.35	1541.43	1606.32	1912.14	2125.43	2525.54	2238.63	1998.51	2200.05	1757.77	670.354	2429.18	1667.69	1403.19	1018.62	4781.17	344.699	3355.95	1753.02	1731.16	1016.64	1216.67	3409.93	700.529	621.293	1012.89	886.713	2545.66	1094.48	1149.02	1572.4	1785.98	1876.95	1253.47	1664.85	1722.44	48.5535
2872	MKNK2	NM_017572 /// NM_199054	3416.42	2142.01	1459.86	9377.39	7591.29	3800.25	9728.56	5128.33	4318.67	3963.5	1670.45	547.424	1497.44	725.909	1162.9	576.682	589.694	1224.82	2719.56	2495.75	3803.26	6966.64	2999.08	6482.61	1179.14	1683.67	1689.22	1633.12	2735.77	1949.48	9739.68	1592.92	2242.13	1823.27	3858.27	1278.79	1487.01	1535.81	3258.83	6677.68	953.627	1897.67	6168.57	3204.03	79.856
2876	GPX1	NM_000581 /// NM_201397	6305.9	3547.69	1490.4	1675.9	9863.16	11541.4	4905.16	6304.5	1474.4	836.709	2883.91	650.001	552.009	1109.6	2027.44	1294.13	1142.66	2155.62	1746.37	2213.47	1665.76	1526.35	1474.34	3987	712.213	1646.55	2161.34	4265.2	3390.68	2038.44	1345.84	672.328	1473.05	1859.19	1411.53	685.829	1707.81	1932.18	5536.26	30435.4	1908.46	3322.48	1661.6	3268.38	147.906
2879	GPX4	NM_001039847 /// NM_001039848 /// NM_002085	9294.64	3387.47	1417.16	1549.32	2890.71	2977.58	1488.66	1852.22	2189.62	1574.94	1407.82	1731.96	1299.56	2465.62	2712.68	1790.35	2096.08	3715.89	2417.51	2672.04	1283.15	1667.88	2477.41	1630.93	1078.95	1980.72	2415.8	4738.81	3108.4	2040.65	2949.82	643.519	1901.07	2232.36	2311.52	9879.12	1920.4	2410.28	2657.07	3154.1	1468.64	2570.32	2926.84	2566.97	68.1399
2908	NR3C1	NM_000176 /// NM_001018074 /// NM_001018075 /// NM_001018076 /// NM_001018077 /// NM_001020825 /// NM_001024094	2445.51	301.572	385.869	1561.79	1826.84	1175.85	2996.35	1585.26	2032.55	2722.08	961.262	411.95	823.069	717.982	604.323	442.051	548.629	532.628	827.032	2900.9	906.794	434.786	640.309	331.068	1323.84	584.214	343.135	371.714	599.939	825.828	1156	566.94	740.959	509.212	1617.69	238.132	1106.71	461.086	997.202	1607.53	1618.17	390.082	1173.77	1031.36	70.8563
2923	PDIA3	NM_005313	1684.22	1661.97	898.94	941.856	4435.46	2622.57	1543.69	2025.8	1217.56	1239.37	2571.72	557.505	487.235	743.44	1234.22	1059.28	534.075	1378.15	1404.59	3837.9	2414.01	2927.17	7079.67	2196.24	178.875	1064.69	1295.75	2182.43	1737.51	1708.37	269.462	974.688	3652.93	2969.8	2304.36	1320.93	1244.41	2937.06	3320.03	550.243	1539.21	3404.39	2269.71	1898.17	68.6909
2926	GRSF1	NM_001098477 /// NM_002092	495.639	580.525	218.59	513.433	1875.77	556.29	282.954	521.353	642.574	352.911	294.092	425.09	378.377	666.42	749.139	513.031	469.766	627.182	557.096	754.279	402.766	515.959	460.58	408.415	476.488	567.612	279.883	153.692	336.484	400.765	1202.21	410.828	329.011	247.453	525.146	236.086	940.985	103.913	952.879	370.679	431.274	450.635	594.741	517.977	57.9068
2932	GSK3B	NM_001146156 /// NM_002093	334.528	372.309	211.903	301.682	385.342	753.83	1267.45	497.349	602.408	685.132	311.712	455.241	481.905	462.333	397.374	373.487	449.034	429.866	298.239	441.699	424.492	475.126	751.412	397.55	622.897	238.544	236.768	382.921	309.493	211.232	232.605	251.23	408.325	239.06	381.585	691.236	420.491	340.7	280.718	604.452	437.195	333.676	689.035	438.92	44.7309
2937	GSS	NM_000178	299.835	508.532	280.595	175.558	886.864	354.889	104.541	258.753	415.185	267.33	278.172	184.927	104.132	370.231	347.97	195.027	215.546	362.821	606.797	295.805	652.546	750.181	955.525	908.403	641.997	187.467	582.946	356.179	540.219	246.971	124.88	428.581	422.781	544.865	446.956	400.768	480.008	191.656	430.707	220.539	211.338	440.477	560.075	400.92	53.2677
2944	GSTM1	NM_000561 /// NM_146421	738.058	1099.42	551.8	155.044	202.447	159.824	158.408	285.872	508.625	522.148	585.53	943.607	367.939	451.124	618.096	924.584	449.217	508.522	1112.68	242.3	647.888	299.512	506.872	397.26	377.732	796.769	664.096	2709.38	478.163	631.528	1372.41	239.679	177.09	673.376	443.999	580.112	458.384	753.018	359.372	177.447	567.815	578.47	653.436	584.396	73.5512
2946	GSTM2	NM_000848 /// NM_001142368	1059.91	1654.69	1136.92	270.626	332.583	301.366	310.592	471.903	688.623	776.665	941.8	1563.97	738.01	757.205	911.007	1377.39	847.387	865.672	1441.31	344.298	1084.44	614.549	709.348	853.425	575.036	1292.62	990.864	3543.51	778.295	987.336	2100.09	564.913	401.086	1106.62	584.934	929.963	667.577	1023.08	556.54	444.322	964.072	869.285	739.155	911	62.0919
2950	GSTP1	NM_000852	1321.16	1473.81	1803.12	877.473	1923.1	2550.47	403.742	1267.95	605.082	1179.57	1605.44	750.738	737.577	663.817	668.46	1114.88	770.467	1052.77	994.761	1781.88	7291.62	2527.36	1514.24	11452.7	1431.76	1370.67	1508.53	586.947	5541.29	1229.79	1327.35	1060.13	2092.54	1443.24	1732.18	447.498	1146.13	2982.07	2085.5	1403.26	1990.26	2307.99	4191.58	1911.88	103.32
2958	GTF2A2	NM_004492	985.951	1013.06	715.511	872.36	951.354	1252.4	776.758	897.226	1010.32	2841.81	978.257	665.101	663.457	741.799	708.407	656.348	597.016	909.563	804.249	883.598	1296.09	1303.67	1164.21	1039.65	582.093	1096.03	622.698	550.568	795.434	686.888	1328.1	381.681	762.007	629.686	666.705	3928.53	2046.56	438.351	902.068	754.322	718.851	948.811	844.011	986.316	62.8915
2960	GTF2E1	NM_005513	254.077	353.303	232.223	578.183	224.367	284.454	407.498	426.871	362.076	310.856	305.327	276.917	240.901	293.919	283.671	285.388	211.184	262.129	289.877	155.784	312.475	276.605	271.846	227.769	333.305	220.771	156.863	162.768	309.834	259.417	343.063	160.398	258.713	185.862	233.159	321.516	919.702	119.552	342.692	206.025	300.798	335.135	268.007	292.216	43.6199
2971	GTF3A	NM_002097	3425.32	1576.14	1024.88	7641.2	9183.45	3544.42	2729.61	3754.02	5181.4	4309.69	3285.19	1224.41	1007.15	1879.75	2168.21	964.634	1439.35	1580.91	2059.97	1311.73	1848.7	1611.39	1381.4	2002.66	2083.03	2430.2	1109.85	1963.93	1781.92	2135.81	4105	3294.72	892.08	1357.07	1785.7	838.804	2611.51	1115.86	3714.79	4371.59	1546.84	1433.17	2241.43	2487.18	69.1422
2987	GUK1	NM_000858 /// NM_001159390 /// NM_001159391	1327.79	1166	567.815	511.55	1979.06	1082.34	2740.61	1569.65	1345.24	1881.32	855.06	1255.28	812.965	1918.12	2061.22	1003.62	1390.07	1572.08	763.885	1407.54	2138.06	1248.04	948.886	2720.12	584.573	800.452	885.033	1089.76	1035.5	829.286	452.209	559.466	704.502	930.984	1533.25	882.348	965.432	784.17	1104.52	18842.2	1514.46	1276.73	1782.69	1647.07	166.374
2990	GUSB	NM_000181	875.004	1458.49	570.694	1830.88	5482.06	3292.86	537.595	1041.44	1246.85	793.224	1711.07	113.983	364.189	299.546	372.794	154.286	145.393	419.337	2032.41	1160.53	584.334	1455.89	1001.3	855.602	566.391	457.727	738.788	1880	1190.69	814.284	235.04	1344.13	1549.59	927.508	865.197	833.512	773.54	793.622	1502.76	1057.91	599.006	1486.34	906.374	1077.26	85.4301
2992	GYG1	NM_004130	1002.28	637.826	682.417	410.09	2341.68	1873.47	1242.82	1247.29	932.65	2075.64	1142.18	789.454	789.038	673.107	1106.89	1187.3	617.775	1794.27	778.999	908.627	586.383	1411.61	1576.47	1678.22	965.783	2136.56	469.925	213.181	844.209	701.799	7510.23	1060.34	597.189	1131.56	649.417	3917.26	480.727	517.325	1001.94	2134.4	1636.3	1003.61	936.166	1288.24	91.8362
3015	H2AFZ	NM_002106	1631.09	1627.01	1176.35	2957.68	7416.39	2853.95	3662.04	2569.63	4491.07	5973.96	3733.29	1181.54	1373.42	2034.4	2002.73	918.506	1445.95	1034.56	1308.44	4396.9	2712.88	2952.45	1578.12	2558.02	2037.16	955.043	1080.96	1041.07	1955.83	1470.44	1338.49	1481.93	1742.17	1502.95	2207.56	2171.02	5985.71	849.778	4032.4	2816.07	2484.88	2774.49	3367.83	2439.21	60.7669
3021	H3F3B	NM_005324	3750.94	5050.09	4179.87	4174.27	12987.5	9712.95	19129.2	8522.02	11280.1	16221.4	7488.53	2726.59	4430.41	2840.26	2967.38	3404.1	2420.97	4049.5	5886.73	8016.9	9527.49	4680.34	7208.3	5711.92	4049.84	1901.43	2785.09	2257	4234.4	4284.83	2356.15	3385.21	3470.83	4083.48	6447.62	5768.79	4536.57	3097.51	6524.5	7633.88	5659.72	5229.15	6740.92	5832.9	62.5489
3028	HSD17B10	NM_001037811 /// NM_004493	1063.45	1759.49	628.806	1524.86	3054.2	1774.62	451.066	879.851	1184.24	1031.76	959.31	440.226	435.909	416.954	541.042	572.371	357.166	743.464	1163.41	658.604	2015.89	1130.07	639.162	2908.49	1449.02	853.926	1599.56	2307.39	948.489	694.653	869.384	749.929	706.856	1002.19	1029.91	274.045	1536.25	979.738	1682.91	687.358	966.851	983.197	1714.5	1101.64	57.7099
3032	HADHB	NM_000183	3634.53	6676.86	1904.18	2153.92	4780.07	3114.62	1852.26	1738.31	1663.57	1264.55	1480.21	1825.75	1098.03	1420.35	2740.59	3079.66	1443.67	5197.31	2385.1	1799.88	2316.47	3212.48	1484.63	3639.88	2802.72	6977.64	3750.73	3379.52	1713.28	1195.24	9829.84	1617.19	1478.15	1473.64	2535.01	1538.37	1912.06	1381.09	2304.28	1900.14	1570.79	1964.42	2845.74	2652.95	66.1591
3043	HBB	NM_000518	24029.8	6904.21	4807.04	19956.2	979.61	8133.04	42684.7	30095.7	1038.38	324.466	18497.5	3630.18	3669.73	5477.18	4139.68	6764.23	4020	9731.64	1624.28	425.765	3649.37	14892.1	823.41	2100.46	205.814	7858.4	5094.95	10659.7	16704.9	4294.6	22179.5	2668.35	12787.7	1123.43	11279.6	2294.59	3288.37	5121.01	931.862	43620.7	32844.2	4773.43	784.906	9463.13	116.963
3066	HDAC2	NM_001527	764.396	684.074	473.912	602.638	1266.75	612.938	313.017	708.66	678.745	559.149	695.896	495.653	399.315	801.591	943.849	580.949	574.53	858.861	795.269	1329.65	651.444	841.659	1033.01	526.205	849.35	436.916	465.286	189.431	480.744	419.889	461.55	1265.08	813.339	559.096	910.505	1267.21	691.412	313.348	803.872	1079.93	1047.83	1044.6	868.571	724.654	38.3609
3068	HDGF	NM_001126050 /// NM_001126051 /// NM_004494	808.573	1006.81	952.324	491.368	1254.93	1516.11	1032.83	1225.51	1129.11	1159.32	1077.42	957.845	1199.79	879.606	712.877	941.916	802.409	681.659	1478.4	2238.34	1612.43	1173.83	643.176	2200.99	1446.3	1069.27	1369.54	1725	1863.42	983.159	1905.78	840.699	1378.54	875.407	966.094	520.197	1914.82	1258.82	1154.55	6649.03	1260.5	1115.71	1123.35	1316.23	70.5657
3074	HEXB	NM_000521	1635.43	1418.84	1651.92	1187.61	5310.57	4823.43	2013.59	1865.93	943.273	621.698	1684.8	759.906	518.889	650.582	657.34	587.846	586.775	631.678	1600.56	2009.51	1068.02	2721.07	2924.28	795.2	1999.24	1136.42	1401.65	968.522	1906.51	1053.73	648.769	2317.61	8324.01	2273.41	2320.06	422.355	1535.55	1537.85	2088.14	1094.85	687.493	1792.21	2095.11	1727.26	83.746
3091	HIF1A	NM_001530 /// NM_181054	2354.48	3193.94	2755.75	3171.09	7352.54	5313.86	7650.59	3543.62	5262.38	5583.07	2361.29	1635.11	1900.77	1554.42	2958.48	2354.19	1616.57	3891.27	2506.38	8963.05	3852.94	3270.68	7267.67	3456.54	5989.86	1676.42	3205.16	823.427	1746.2	1751.33	707.824	6895.97	1790.35	1533.92	2908.66	1719.86	4115.18	1226.53	4310.99	5497.46	4932.43	4029	3020.24	3526.78	57.3427
3093	UBE2K	NM_001111112 /// NM_001111113 /// NM_005339	502.583	394.154	197.766	552.492	1392.49	661.152	559.609	507.113	535.113	557.115	367.725	296.007	332.109	446.952	497.416	323.2	357.316	421.028	428.037	894.953	592.954	672.342	701.516	674.248	538.892	262.331	262.197	367.627	261.506	244.473	252.289	344.98	566.603	223.591	603.967	449.172	1328.11	105.963	802.532	649.498	298.653	469.903	753.852	503.524	51.7205
3094	HINT1	NM_005340 /// NR_024610 /// NR_024611	3070.94	2867.11	3058.38	5273.98	5921.89	3223.77	1492.56	3564.8	6233	10919.3	4212.85	2482.48	2657.14	5131.63	4125.68	2400.91	3861.34	3625.66	2882.54	5338.82	5332.06	6253.23	3070.12	4959.58	4595.87	2566.59	3814.68	5682.23	4199.5	3189.8	5323.92	2658.31	1644.23	4193.32	3409.42	2223.65	3447.71	2229.46	3766.65	1658.65	2180.15	3801.18	5241.5	3902.01	43.3558
3105	HLA-A	NM_002116	8075.88	10977.6	12652.2	19322.2	17848	21694.7	31296.2	25725.8	19696	23641.8	14850.7	3289.41	3191.86	2221.35	3184.89	5009.72	2581.66	4590.47	8122.55	8237.41	12387.1	23382.9	6981.02	11464.9	2043.15	7697.06	9102.67	8644.2	18099.1	17273.5	5072.28	9497.01	8163.76	11446.8	9851.02	3629.06	9941.97	9251.44	14498.5	22323.1	7426.79	10633.3	12033.5	11559.4	61.9138
3106	HLA-B	NM_005514	5817.04	6076.17	8104.04	13583.4	17511.6	20123.8	35562.9	22424.5	17274.3	21242.5	14417.5	1676.6	1406.31	1014.59	1307.13	2563.16	1098.86	2531.45	4384.57	5518.59	8207.98	14692.6	3285.64	5253.64	376.705	4601.86	5453.46	5507.51	13397	16331.8	2376.36	4408.61	5351.75	8866.93	6595.06	2026.74	7691.11	6553.58	13375.5	19616	4677.4	7597.45	9017.01	8811.64	84.8204
3107	HLA-C	NM_002117	6248.37	7548.52	9938.61	16123.3	16094.8	20474.5	32259.1	21884.7	17299.5	20973.5	15290.2	1831.1	1313.38	1117.27	1777.87	2891.19	1264.37	3250.99	6322.9	4603.31	8869.52	14356.9	3566.61	6488.39	1181.43	5293.68	6055.2	6204.87	14561	15511.2	2544.79	7010.4	6500.54	10928.9	6901.97	1593.68	8311.99	6806.43	12514.1	20102	6369.07	8064.73	7475.89	9202.81	76.4123
3115	HLA-DPB1	NM_002121	1716.93	1252.77	2625.77	13825.4	20047.9	8387.43	4063.44	6802.23	2530.65	4143.58	2796.17	670.332	793.06	227.857	766.65	956.308	273.502	1203.91	1598.52	188.362	2221.11	2383.92	2010.44	1617.28	370.294	1423.38	1202.41	2216.17	4745.42	8346.14	682.354	1968.69	832.618	2084.79	3381.38	338.167	2057.45	1659.59	11689.5	3974.05	677.109	1154.97	2996.36	3137.31	126.507
3133	HLA-E	NM_005516	2668.45	1718.59	1859.41	7952.57	9708.52	8919.84	17695.1	10014.2	7883.45	8762.33	3939.17	657.775	367.024	416.537	785.163	876.43	450.935	1546.4	1926.82	2140.17	2493.99	3591.8	1770.8	2849.22	688.505	1450.96	1845.38	1773.39	3960.87	5654.12	909.05	1997.12	1795.68	2020.98	3307.64	377.686	3088.03	1928.79	5137.86	6472.89	1416.09	1873.55	3022.73	3481.77	100.743
3134	HLA-F	NM_001098478 /// NM_001098479 /// NM_018950	2092.85	1723.5	3413.76	4782.1	8587.63	10084.1	20190.6	9693.21	10509.3	11595	4325.46	897.639	718.495	475.297	546.177	1066.85	532.84	1030.2	1374.19	1588.48	2491.11	5652.02	1117.89	1744.67	349.199	1737.1	1927.04	1816.61	4930.92	7229.83	1141.04	1587.8	1785.04	3000.6	2273.21	771.427	2174.17	2967.48	5989.25	6175.77	1379.75	2640.21	2555.72	3689.89	107.409
3146	HMGB1	NM_002128	6840.25	3698.58	3704.88	4566.87	7161.3	6458.04	8379.67	6589.42	7916.73	12455.6	7331.46	3731.91	4276.74	5565.48	4862.53	4669.04	3971.48	5804.99	6896.39	7150.51	8011.04	5011.66	9068.73	4953.36	8002.54	2958.03	3277.17	2316.67	4360.89	4943.62	4199.77	2237.24	3012.92	4164.38	5622.55	2839.68	7274.43	2867.78	6383.34	4765.93	8186.43	6857.94	8263.9	5618.88	38.5016
3148	HMGB2	NM_001130688 /// NM_001130689 /// NM_002129	898.026	926.531	377.797	2823.57	4988.42	3460.87	2611.09	2783.89	5245.49	5283.35	3334.72	343.27	211.879	551.866	628.926	441.967	385.928	755.349	1048.38	3741.17	1414.67	1572.57	1556.99	800.397	2203.41	677.376	492.593	786.77	870.855	1138.94	452.343	1102.59	882.687	563.522	2041.69	2295.37	3402.81	461.25	3299.24	3012.66	1331.72	1840.01	1599.01	1735.86	80.6212
3150	HMGN1	NM_004965	1518.75	2514.63	2338.91	6004.33	11904.8	2760.75	3368.29	3915.64	6279.78	4781.11	4236.78	878.468	1068.48	1364.02	1220.97	943.576	1054.86	879.898	5353.74	3641.75	5041	2962.23	3913.18	3488.02	4720.45	1235.59	1705.07	1156.74	3062.72	2750.47	585.148	3088.33	2841.4	2649.92	2849.94	1654.68	6870.42	2252.46	6094.53	4581.64	2951.62	3810.02	3222.03	3244.58	65.5936
3151	HMGN2	NM_005517	6027.4	6360.06	3620.94	6684.29	10785.4	6886	9510.3	7944.66	8174.1	6822.25	8124.52	3011.85	3025.73	3119.54	3333.86	3225.58	2929.67	4401.87	6417.17	6334.29	5315.44	5977.51	7592.49	6023.34	7596.83	3522.68	3472.94	4181.14	6235.46	5618.55	4507.15	3909.65	4919.97	5184.88	5447.84	3318.91	9203.57	6097.89	7367.67	10384.2	7702.99	6845.7	6655.98	5902.84	35.2289
3178	HNRNPA1	NM_002136 /// NM_031157	5704.33	8637.13	4722.28	14803.5	18192.3	9629	4317.71	8726.56	10740.8	13927.5	7277.15	3632.52	5038.96	5199.01	5616.44	3777.95	3872.39	7088.38	9131.77	12346.7	7377.97	7998.3	8023.09	4943.54	9019.35	3291.98	3829.45	2551.09	4798.67	5346.06	3633.59	8681.23	4271.71	4537.46	7064.82	2080.08	8846.89	3055.21	8767.09	9867.33	10384.2	7396.71	9604.04	7157.03	48.6742
3181	HNRNPA2B1	NM_002137 /// NM_031243	2713.61	3126.68	1530.34	4844.92	12578.3	4686.21	1650.04	4489.46	5452.9	2827.49	3667.88	1906.99	2189.18	2404.38	3103.85	1997.68	1921.78	3685.93	2467.9	4463.72	2821.85	4281.91	2260.98	2063.68	2783.49	2483.79	2346.58	2017.59	2422.37	2409.44	3650.03	2403.89	2567.88	2682.48	3003.93	3307.39	5628.05	1976.8	6560.41	3549.59	3376.56	3877.7	4420.86	3362.94	54.8509
3182	HNRNPAB	NM_004499 /// NM_031266	1435.62	2585.09	1001.6	1275.39	5927	1453.09	801.646	1247.94	1753.45	1319.46	2486.83	477.253	708.459	950.894	823.395	802.374	599.284	811.217	1489.13	3307.8	2488.02	4130.11	1699.91	3772.39	971.7	1187.77	993.632	1365.71	1525.19	1086.01	848.445	880.09	1432.75	1061.56	2177.44	665.686	4158.26	592.603	3425.86	1398.6	2118.17	2054.47	3189.8	1732.12	68.4806
3183	HNRNPC	NM_001077442 /// NM_001077443 /// NM_004500 /// NM_031314	1458.93	1248.85	942.397	1533.86	5611.02	1807.04	3820.26	2352.06	3059.35	3723.36	1741.73	1055.61	925.652	1256.27	1606.09	1270.61	971.241	1762.17	1540.95	5861.24	1725.92	1500.23	2196.31	1794.28	1318.54	1194.79	1204.15	977.65	1413.32	1208.13	920.73	958.984	1526.91	1073.43	1705.04	1176.85	2373.6	606.635	2978.76	2616.37	1533.86	2152.72	1927.72	1851.94	60.8706
3184	HNRNPD	NM_001003810 /// NM_002138 /// NM_031369 /// NM_031370	1037.69	753.695	611.688	2096.29	5183.8	1891.1	1097.74	1492.73	2361.22	2148.4	1330.25	458.361	778.243	881.646	951.642	572.273	499.693	1012.78	1473.97	2090.36	1032.83	967.13	1504.93	1038.27	1133	651.91	537.12	481.298	635.393	981.594	489.029	1115.5	1008.83	724.408	1278.79	473.415	1544.03	244.768	2308.57	1556.61	915.472	1307.9	1722.52	1218.07	67.7929
3187	HNRNPH1	NM_005520	501.374	334.447	216.976	894.352	2518.15	720.604	686.674	1061.4	1673.97	2252.59	774.193	234.71	443.078	304.246	621.952	258.196	225.695	660.83	595.246	976.022	455.867	519.921	1107.24	398.749	283.115	423.749	356.412	368.502	301.606	700.919	262.254	516.253	498.832	240.537	928.448	448.562	618.268	262.858	1277.78	587.394	518.45	1094.6	429.168	664.051	75.3967
3188	HNRNPH2	NM_001032393 /// NM_019597	825.09	650.25	398.854	460.089	1419.89	1192.3	2076.63	1095.95	840.575	1359.13	407.44	605.305	681.92	1026.39	1427.89	793.634	770.313	1175.82	660.957	1453.99	562.273	984.762	960.865	689.183	249.657	750.909	774.877	484.312	522.355	495.828	708.62	515.622	650.115	549.13	1067.55	377.736	731.182	198.519	955.413	1255.09	828.564	1023.12	687.62	821.994	45.5142
3189	HNRNPH3	NM_012207 /// NM_021644	673.499	747.384	652.513	1034.84	2823.06	1305.26	1701.28	1497.57	1796.12	2299.78	1062.33	520.781	794.618	821.223	778.802	616.31	584.014	808.107	932.982	1968.59	795.968	754.422	757.546	480.258	868.049	531.081	441.739	349.194	570.761	630.48	512.007	513.618	716.129	584.934	938.556	705.061	2569.63	366.552	1026.79	1571.51	837.417	872.04	837.332	968.608	60.0088
3190	HNRNPK	NM_002140 /// NM_031262 /// NM_031263	3290.37	2575.42	1795.97	3338.65	7551.37	4028.35	5497.64	4531.41	5784.17	6208.44	2753.63	2089.31	2212.77	2553.09	2807.54	2398.33	2038.76	2851.22	2857	5071.71	2545.71	3534.12	4468.17	2684.22	2921.33	2747.39	2682.42	2482.92	2315.02	2539.06	2007.49	1485.86	2765.07	1740.39	3994.79	2111.18	3407.75	1579.8	4147.26	7199.45	3056.81	3339.3	3483.87	3290.1	43.5006
3192	HNRNPU	NM_004501 /// NM_031844	900.61	861.683	574.773	1132.5	1541.85	1155.1	2231.55	1277.94	1755.37	1621.31	1029.62	658.857	783.892	908.451	1044.05	789.258	671.029	1102.31	954.337	2240.2	740.72	747.523	1358.13	651.267	766.837	808.044	693.598	437.509	741.489	733.225	647.46	512.173	717.109	671.712	783.122	975.847	876.636	455.856	1101.19	1065.29	885.8	1069.61	904.374	966.958	41.9084
3251	HPRT1	NM_000194	1016.53	440.595	723.8	517.104	355.707	269.555	251.527	651.03	663.665	831.192	350.446	263.305	246.699	312.166	351.764	278.848	219.329	301.868	708.409	1612	799.757	713.618	1014.65	620.515	898.252	513.405	462.473	302.52	530.057	491.03	587.324	601.235	550.262	710.506	867.838	882.966	525.649	629.6	300.347	386.37	872.153	861.089	753.935	587.002	47.7682
3281	HSBP1	NM_001537	921.201	1902.04	1017.49	455.52	1714.57	1877.42	1698.33	1061.55	542.189	874.666	754.152	1083.75	887.419	1695.32	1563.48	1331.83	1401.39	1781.11	1347.77	1007.21	2265.3	1465.58	1295.46	2164.39	1042.56	1202.06	1232.76	830.052	1877.02	731.546	1053.56	1038.79	986.114	1140.06	1011.43	1818.73	1200.81	1192.42	1022.5	771.688	1029.07	1418.94	1248.18	1254.82	33.666
3295	HSD17B4	NM_000414	2211.82	1634.77	896.387	1444.77	2127.64	1258.1	481.499	801.411	549.074	171.302	675.359	816.595	432.819	1148.98	1708.05	1200.24	798.282	2498.15	1319.2	562.323	1693.59	1433.67	1723.33	1297.64	1504.16	860.517	984.455	1995.21	1035.82	555.71	735.812	1834.52	999.819	1139.48	1430.82	351.444	475.04	1119.1	1626.71	907.364	594.632	1028.12	2521.8	1176.41	49.408
3301	DNAJA1	NM_001539	1391.71	2660.92	1199.04	1348.59	3250.2	2136.75	3736.07	1645.41	2373.94	3477.25	1802.96	1599.53	1228.89	2924.48	2536.2	2006.31	2225.38	2226.83	1572.58	2976.73	1687.62	1395.25	1615.67	920.962	1185.15	1124.34	1458.12	1801.94	2448.6	1173.6	616.834	1986.95	2182.35	1367.99	1230.61	2745.81	2521.97	972.537	2347.86	2792.46	1128.86	1880.21	2058.97	1929.41	38.0599
3303	HSPA1A	NM_005345	3188.67	8127.7	3143.16	924.372	2294.24	5725.08	8600.12	4254.57	3423.6	2476.61	5138.1	3695.92	2522.15	3571.94	5220.16	4207.34	3239.74	6094.28	9107.37	8063.5	5526.21	5133.12	3451.93	6791.56	8232.14	5764.98	4671.71	7188.51	5791.3	3459.37	5950.7	7753.01	1874.86	4770.18	4492.82	2005.1	5670.84	3103	4419.15	7253.85	4369.99	4137.8	5068.96	4881.39	40.829
3309	HSPA5	NM_005347	2466.94	3035.9	1737.07	1411.27	4322.48	2867.27	2291.95	1940.37	4498.29	6589.51	5678.69	1518.56	958.82	1694.37	2155.3	2213.42	1404.67	2585.52	1809.1	8531.57	3214.97	4344.8	6276.43	2329.72	1231.72	3369.99	2512.7	4085.16	3019.61	2220.3	1354.31	1664.75	5701.67	3176.47	2699.8	3565.34	1294.8	4089.65	3337.97	1639.79	4656.58	4569.69	4538.5	3130.37	53.4754
3312	HSPA8	NM_006597 /// NM_153201	6185.94	6408.16	3915.29	4715.37	10520.9	4642.25	5452.61	7096.49	10238.5	9614.53	6167.92	3861.84	5022.01	8834.44	6307.8	5185.17	6148.54	8276.83	4316.71	8404.93	7542.26	7442.5	7513.21	6730.55	2251.44	5327.98	5885.81	5332.75	7088.87	5207.69	9863.62	5364.67	6697.39	3988.7	4751.64	4206.01	4951.44	2407.47	8124.02	5055.47	5575.19	6533.5	9035.36	6237.07	31.7356
3313	HSPA9	NM_004134	955.441	2347	569.224	1102.02	2145.55	961.568	443.619	921.854	1429.94	2074.48	1055.98	882.248	744.5	1300.01	1468.96	1118.8	1013.67	1594.93	1015.99	2989.52	1022.18	1066.55	1256.11	998.263	792.98	1429.68	1551.28	1494.66	822.209	745.635	1561.44	910.103	777.657	897.82	967.646	759.57	808.938	584.024	1336.99	760.078	574.404	968.66	924.566	1142.95	44.3153
3320	HSP90AA1	NM_001017963 /// NM_005348	6606.35	8675.6	4292.25	5693.28	8470.06	5080.9	3983.51	4788.78	6847.99	8776.01	5531.32	6395.78	4603.64	9556.66	10824.9	6609.71	7033.78	12230.9	8422.37	8933.14	6216.49	6865.68	6744.95	3225.25	6452.95	4270.01	5039.73	2896.79	9628.19	3375.56	4030	6107.92	5725.82	4576.35	5827.36	7009.92	5719.71	2239.61	5889.18	5105.34	4930.08	5656.61	6742.36	6224.02	34.0844
3326	HSP90AB1	NM_007355	4126.4	5580.64	3734.58	2826.83	4156.35	1107.23	1344.27	2556.98	4113.65	4396.09	4689.51	3356.21	3793.43	6133.69	4416.85	4272.05	4941.94	4721.61	2871.34	9718.02	4534.25	2593.2	5455.54	3718.79	1012.55	4537.49	2954.3	2517.46	4191.57	3486.56	4615.2	1853.25	3275.63	4477.74	3508.61	2550.57	1763.66	2473.46	3797.21	2741.99	3560.11	4415.95	3850.65	3738.22	40.1296
3329	HSPD1	NM_002156 /// NM_199440	3786.64	14060.6	2022.81	2504.06	3513.87	1860.85	1231.26	1957.36	3486.28	3632.75	4200.38	2047.33	1625.63	2733.57	3378.44	2599.46	2144.26	3606.98	3515.63	7752.07	3329.36	3251.41	3185.37	2416.31	1445.78	2114.44	5613.84	4321.24	2866.92	1855.78	2150.96	1961.01	2649.11	2279.3	2423.49	1338.43	2721.06	1280.24	3393.38	2165.38	3009.66	3497.53	3801.05	3133.29	66.4975
3336	HSPE1	NM_002157	1225.61	4133.2	783.728	982.656	965.354	468.058	253.513	801.09	1572.93	3335.23	1023.56	500.067	396.292	952.774	1237.24	674.967	739.796	1284.76	903.629	1555.63	1218.6	1403.58	1300.36	726.276	837.865	688.197	1508.06	2112.89	1103.79	502.749	1100.41	810.39	824.31	744.36	1009.78	472.749	3178.85	486.383	947.815	561.012	717.395	1110.49	1526.27	1132.16	68.5838
3337	DNAJB1	NM_006145	1031.8	1941.38	573.505	287.587	387.244	555.069	2452.82	1015.22	4099.15	4619.27	2394.87	524.042	636.204	697.411	908.287	734.452	498.171	789.667	937.616	2494.55	3249.37	715.266	619.084	4529.07	429.915	631.612	662.752	641.79	995.572	827.674	337.409	356.799	1156.71	585.04	898.48	2671.24	905.896	339.095	740.18	1036.19	338.355	753.577	1237.1	1214.8	92.806
3376	IARS	NM_002161 /// NM_013417	1638.3	1235.47	722.453	1584.14	1735.8	821.923	503.461	1024	1337.71	1351.65	1675.02	1168.7	1413.97	2005.17	2194.46	1178.83	1397.25	1560.03	1699.2	4978.81	1727.71	1508.71	2917.92	1473.28	1639.58	1200.1	941.2	547.607	1273.82	938.36	1836.93	731.301	1039.38	896.281	1431.24	726.454	2256.9	645.254	1529.97	1295.18	1147.26	1621.2	2221.26	1459.84	50.9194
3416	IDE	NM_004969	273.72	172.794	235.242	213.365	348.1	284.677	119.456	220.184	297.327	157.736	469.4	147.141	192.322	136.354	147.291	154.702	142.348	152.99	192.069	271.028	910.525	232.534	444.118	260.002	391.722	387.045	171.054	168.934	215.386	230.337	450.318	154.981	218.103	281.465	1126.48	806.376	161.976	174.374	363.793	106.839	124.885	309.027	1062.54	304.211	78.9619
3419	IDH3A	NM_005530	490.42	398.494	112.75	245.73	2248.05	271.619	131.666	272.395	290.123	471.558	242.075	577.891	602.804	781.719	952.138	643.071	637.144	765.029	145.01	513.763	538.392	686.695	401.697	362.506	291.58	1182.34	347.972	116.065	243.35	247.493	640.428	184.764	309.907	314.028	261.928	421.846	410.21	120.719	1484.42	141.706	340.593	276.553	310.346	475.093	83.6191
3420	IDH3B	NM_006899 /// NM_174855 /// NM_174856	713.864	873.772	346.896	791.953	2467.91	1178.92	582.318	712.349	977.819	1116.16	402.34	509.041	841.222	883.51	672.784	568.66	619.867	718.324	723.089	548.093	766.076	676.6	475.527	1147.72	351.672	965.763	628.618	618.761	501.417	554.496	1147.33	452.901	467.889	617.321	673.332	475.978	780.014	353.531	998.015	754.275	301.013	599.296	864.98	730.731	48.5066
3422	IDI1	NM_004508	867.49	4515.6	418.033	1445.95	1664.65	895.717	3788.5	857.48	1859.33	4128.37	862.708	521.154	576.544	1750.4	1276.54	966.241	1101.7	1322.38	1164.81	1873.06	1753.26	1142.58	773.439	525.284	476.272	248.601	642.683	1441.04	941.378	465.717	1441.23	474.724	498.12	1107.34	1050.46	441.775	510.597	106.623	920.884	2811.91	931.803	454.876	1595.52	1223.55	79.617
3459	IFNGR1	NM_000416	2181.59	569.951	999.197	1017.26	3087.16	2411.51	7371.15	2404.24	878.825	1890.34	890.242	638.163	398.879	580.591	1366.31	965.003	588.417	1763.65	1278.3	1545.56	1046.55	2249.07	1967.73	430.711	739.878	1476.74	589.703	720.499	993.625	1375.2	575.948	926.483	1814.56	942.892	1721.65	453.696	498.586	574.115	3031.95	3405.95	751.289	1253.15	1777.76	1445.21	83.3742
3460	IFNGR2	NM_005534	1866.89	973.652	774.111	1513.93	1307.09	3958.82	9507.34	2569.24	551.477	104.169	1098.76	752.777	278.825	947.959	933.064	483.756	658.797	545.268	1053.61	5871.65	1586.69	2253.37	1130.32	1653.31	788.165	833.673	713.544	579.632	707.8	1495.38	503.035	1081.05	1425.78	1378	1033.51	850.289	1051.93	1244.84	1552.01	3235.74	1855.88	1459.12	932.84	1513.89	106.541
3475	IFRD1	NM_001007245 /// NM_001550	924.343	335.349	202.045	473.437	1286.95	418.858	2046.25	955.433	987.589	1234.7	518.054	300.661	213.24	425.153	1022.16	370.225	318.975	843.197	839.326	1437.57	558.065	748.742	599.575	226.196	706.045	298.758	310.001	190.297	385.538	130.507	553.27	1774.04	483.77	387.851	708.227	379.988	538.576	155.463	647.27	1224.67	510.94	468.486	891.14	651.882	66.5348
3476	IGBP1	NM_001551	801.951	454.153	443.586	684.61	2234.16	1193.92	803.571	1015.56	1395.41	1329.57	814.278	331.029	529.854	662.741	464.166	378.954	394.166	559.89	606.586	786.795	770.847	862.144	643.41	1031.67	970.795	569.01	420.712	191.151	649.422	856.109	980.224	1089.72	420.34	610.74	715.642	295.889	794.423	525.498	973.547	902.824	695.459	712.031	995.717	757.262	47.2334
3516	RBPJ	NM_005349 /// NM_015874 /// NM_203283 /// NM_203284	1269.74	1201.14	1292.15	901.994	3409.93	2171.95	3471.14	1810.67	1314.31	2390.15	1095.87	1273.33	1087.38	1212.99	1403.16	1107.44	1065.08	1911.52	1267.42	3495.77	1040.57	982.854	1208.19	638.081	1910.99	847.402	754.489	457.672	1398.98	1006.78	920.801	716.532	1479.76	1282.1	1777.17	1082.84	1620.78	819.084	1548.16	2356.6	1701.58	1245.72	1933.57	1462.41	48.3171
3550	IK	NM_006083	1167.62	1203.52	637.473	2113.92	4062.22	1841.81	2301.33	1533.15	2049.42	1929.23	775.379	526.325	599.506	963.429	768.451	629.959	531.456	760.069	876.745	841.595	1044.75	876.225	921.398	1007.67	724.118	840.038	509.917	291.167	2242.21	752.127	790.352	762.876	510.107	726.168	824.619	1512.69	1014.45	421.753	1515.03	1349.37	768.539	842.322	1010.35	1101.65	62.564
3608	ILF2	NM_004515	815.455	636.907	598.248	735.534	2250.54	739.758	401.983	865.571	1359.34	1794.13	1324.59	413.046	387.614	642.274	693.508	566.272	563.648	733.98	713.231	2473.96	823.606	896.5	865.434	1282.49	838.62	665.808	940.387	491.33	661.534	693.666	574.094	413.763	796.435	600.937	952.91	1500.58	1031.16	527.783	1450.34	1085.29	624.688	1211.42	1040.72	899.514	50.9709
3609	ILF3	NM_001137673 /// NM_004516 /// NM_012218 /// NM_017620 /// NM_153464	260.022	468.284	235.646	520.014	942.218	401.835	286.108	425.732	911.376	936.514	532.591	271.393	412.163	385.368	344.188	327.295	298.578	370.448	386.348	932.897	311.879	148.308	392.932	333.138	337.424	331.378	316.215	299.083	325.835	530.445	285.492	185.658	320.063	291.107	358.724	703.251	465.575	231.56	697.631	315.934	337.715	507.849	281.541	417.622	48.1791
3612	IMPA1	NM_001144878 /// NM_001144879 /// NM_005536	465.675	660.271	350.923	1046.82	809.766	604.928	817.731	967.514	1080.45	1065.83	591.691	689.07	450.968	1273.47	1646.94	1047.52	976.587	1500.1	486.139	1089.7	608.633	2378.43	1051.24	711.569	564.084	796.322	449.266	413.173	702.026	542.54	467.394	796.401	216.685	355.005	546.667	1532.91	912.845	345.003	1074.61	597.441	357.386	546.915	607.601	795.261	52.708
3615	IMPDH2	NM_000884	1317.89	1947.16	1487.67	2991.55	3546.21	869.2	473.776	1162.34	2056.66	1358.34	2913.99	493.628	429.263	796.415	724.077	670.499	574.651	880.837	3742.31	5687.52	2937.76	2069.98	1407.25	3829.2	2124.27	721.356	802.118	691.427	1769.14	1337.48	1735.12	1905.33	912.409	1801.06	2516.3	500.18	2032.57	742.726	2481.32	1847.89	1826.73	2407.45	3823.66	1775.5	65.06
3628	INPP1	NM_001128928 /// NM_002194	500.07	1345.68	1126.2	471.041	568.7	543.794	335.709	340.085	416.621	289.058	472.31	1012.47	1145.77	1112.17	1278.34	1149.24	964.132	1183.34	998.872	1560.41	3201.24	799.814	572.281	2787.22	961.78	880.068	497.727	886.793	740.024	481.34	553.783	2530.62	381.089	638.505	1117.96	2627.61	1148.09	528.818	787.178	396.568	264.989	571.832	994.582	957.3	71.0689
3632	INPP5A	NM_005539	948.081	895.629	690.186	519.259	338.538	656.156	1534.04	525.045	447.961	284.808	354.452	3519.05	3302.01	1205.36	1237.21	897.307	1151.01	721.46	869.145	798.85	610.429	1352.72	1097.86	1607.62	556.548	2100.17	513.728	631.024	579.912	496.128	1695.87	960.84	711.142	985.745	1267.64	1179.56	1317.25	531.451	293.702	756.115	2511.94	1086.77	623.551	1031.7	69.124
3646	EIF3E	NM_001568	5434.03	4518.87	4202.93	14387.3	14433.7	9465.59	3164.51	7555.18	9340.62	10360.7	6028.35	1913.5	2601.75	2274	2430.64	1714.33	1813.58	2310.44	10366	8762.5	7164.15	4402.18	6265.04	4007.06	7534.67	3262.43	2679.02	1998.85	3736.55	5535.55	4719.3	5204.21	3088.58	3950.83	6637.21	2392.08	8428.28	2233.79	7038.22	6970.01	7685.95	5274.76	7851.03	5607.87	57.1743
3654	IRAK1	NM_001025242 /// NM_001025243 /// NM_001569	843.742	1713.09	666.216	2532.73	2526.86	3748.23	1151.48	1174.52	973.561	1011.76	1958.23	343.989	343.719	652.096	574.976	499.375	452.144	762.582	1258.89	1181.69	1551.29	1240.58	546.038	2114.93	872.973	477.929	872.169	511.102	1048.39	1236.01	579.063	1261.22	688.066	1153.79	743.513	432.15	1447.3	406.859	1461.97	1253.5	1285.21	778.91	1148.75	1104.22	61.5528
3682	ITGAE	NM_002208	1446.27	839.645	833.395	1757.5	2769.59	1441.85	669.323	851.638	1445.62	3656.43	996.073	1033.5	604.434	795.985	945.901	682.251	641.384	1027.35	785.466	674.106	1074.47	864.035	630.489	1101.56	1401.78	642.356	577.148	234.782	941.56	623.573	1235.12	548.529	291.693	521.87	807.78	1008.36	2099.03	562.213	1745.33	708.373	589.398	1025.62	1169.47	1030.29	61.2386
3688	ITGB1	NM_002211 /// NM_033666 /// NM_033667 /// NM_033668 /// NM_033669 /// NM_133376	4275.16	1119.85	876.334	877.419	1971.4	1233.59	559.906	943.723	1687.7	925.483	487.207	316.561	171.979	265.725	449.437	521.7	251.976	830.042	1318.78	3820.21	740.31	2085.89	2644.14	682.81	826.48	2769.99	801.366	758.521	713.471	810.327	1661.05	2188.97	1573.75	999.599	1598.64	511.813	930.039	547.684	787.943	575.496	4681.16	2140.18	1150.19	1281.02	81.4225
3692	EIF6	NM_002212 /// NM_181466 /// NM_181468	688.324	1046.6	793.039	793.39	2309.1	1434.43	777.465	847.446	799.937	1954.9	894.831	435.428	496.201	558.422	439.926	434.954	523.388	508.222	702.745	1094.48	2354.28	2207.62	666.97	3547.96	637.553	426.455	1069.22	1448.43	1109.07	670.659	492.394	626.831	814.162	883.948	1019.34	1092.33	873.999	775.129	1395.19	994.897	861.387	990.128	1567.82	1024.63	61.659
3716	JAK1	NM_002227	3674.71	1694.79	1498.18	4178.52	8321.29	3073.33	10130.7	4082.78	5432.94	6867.44	1609.88	912.023	1219.39	1085.64	1512.78	1146.7	960.337	1160.31	2144.78	4150.76	1527.92	2303.75	1878.89	1511.63	2223.37	1708.37	1413.61	992.646	1332.7	2523.97	1374.41	2337.22	952.486	1158.37	2750.22	1435.15	3159.88	866.71	4029.45	3942.3	1172.23	1877.39	1859.16	2539.28	79.1878
3720	JARID2	NM_004973	150.182	471.08	233.899	912.024	1292.64	1536.79	2755.66	1142.85	876.978	905.342	551.028	219.719	789.278	317.173	356.137	192.849	289.263	283.645	470.85	388.648	520.734	198.25	193.74	350.174	364.388	177.772	148.438	147.435	237.25	273.838	243.925	236.492	287.502	206.459	597.913	566.594	1190.9	148.67	611.302	1138	224.031	242.295	592.512	535.689	92.8357
3725	JUN	NM_002228	398.955	765.573	317.337	195.486	233.787	2609.16	211.061	184.076	1135.94	2602.45	3096.74	140.811	307.933	316.694	461.232	199.806	243.419	234.557	3235.67	898.481	1836.85	1209.5	821.999	727.239	249.785	642.246	518.259	307.749	492.274	644.105	426.605	868.288	125.486	1202.52	430.347	249.252	660.342	372.795	767.444	195.723	2320.45	1242.07	448.437	803.463	101.786
3727	JUND	NM_005354	619.621	1498.34	410.244	377.188	326.081	784.013	4135.98	1007.71	2887.77	3743.97	1366.2	616.628	671.693	686.181	851.591	600.897	557.119	598.233	1608.22	1263.98	570.005	1186.38	1837.31	639.423	371.351	511.813	591.583	420.709	498.657	743.421	434.398	495.548	974.998	467.381	571.275	707.879	367.454	568.024	395.17	3915.26	1619.92	1134.86	1027.62	1038.65	90.9076
3735	KARS	NM_001130089 /// NM_005548	3357.96	2513.75	1848.84	4975.07	7657.33	4286.63	1919.87	3209.23	4188.14	4606.46	2702.33	1188.95	1030.6	1653.91	1790.9	1234.36	1351.71	1718.21	3794.99	4212.57	3505.85	3599.34	2954.09	3414.83	4005.5	1935.44	1588.55	1719	2789.06	1949.81	3815.35	4214.68	1857.81	1897.09	2932.44	3741.29	2879.59	1271.99	3698.54	3526.78	2064.82	2550.62	3384.09	2896.24	45.1118
3799	KIF5B	NM_004521	2561.15	811.532	528.274	555.612	2001.34	1105.18	1509.46	822.47	1299.32	1386.1	662.849	784.843	664.421	1163.18	1266.65	1459.44	717.068	2329.34	932.201	1690.88	1226.66	1486.3	2778.56	515.61	1098.02	1082.68	515.577	381.747	821.53	548.968	805.16	734.884	1273.2	740.584	1484.02	1471.36	1180.99	312.623	1097.63	751.471	2997.38	1238.73	1949.88	1180.11	53.494
3831	KLC1	NM_001130107 /// NM_005552 /// NM_182923	616.486	432.259	302.927	361.976	1258.79	526.393	844.405	396.658	681.479	295.722	278.253	1003.51	1930.06	2694.12	1881.35	1339.92	1798.04	1882.75	430.03	1221.53	508.288	301.158	540.349	591.096	394.124	694.002	146.828	211.711	354.461	335.891	706.067	221.025	501.459	334.82	580.467	334.934	391.547	194.535	605.023	378.326	614.208	630.896	667.767	707.34	80.5389
3837	KPNB1	NM_002265	1554.64	1050.7	1029.35	1504.72	1368.7	1419.15	4404.51	2124.46	2052.11	1735.49	1225.33	587.565	594.704	1089.92	1087.28	765.392	710.282	1297.16	1991.27	1987.59	1362.12	1275.12	1781.19	1163.68	1025.3	759.485	798.871	722.644	1257.92	1409.21	964.056	642.341	1119.16	824.502	1302.81	2369.13	2561.63	509.08	1673.52	1527.04	1997.42	1594.45	1425.24	1387.12	49.5694
3838	KPNA2	NM_002266	594.483	484.859	495.383	757.639	2368.38	712.847	424.253	652.158	1795.3	1917.94	1206.88	435.483	455.851	843.158	1178.58	607.085	635.792	750.598	913.12	1565.55	1296.99	888.955	512.172	1039.44	1150.84	431.736	301.447	447.819	639.375	619.991	195.317	1065.55	897.5	226.564	803.925	3973.74	2201.49	228.507	1852.11	1063.83	711.078	1357.95	1160.57	973.54	72.4382
3839	KPNA3	NM_002267	764.998	381.835	314.448	506.442	791.581	611.413	488.715	608.463	698.069	728.052	456.09	652.345	506.123	918.397	1080.43	727.471	652.474	817.034	457.301	636.054	605.151	700.136	655.313	604.525	524.799	857.419	284.497	300.589	578.92	392.792	2665.19	353.627	403.053	291.937	818.048	811.699	1220.79	388.764	615.339	597.598	949.727	660.344	807.583	671.757	55.9825
3842	TNPO1	NM_002270 /// NM_153188	1649.28	1401.76	609.681	1035.91	1357.28	900.375	1117.89	1415.42	1282.07	1601.54	765.959	822.345	682.63	963.171	1065.98	913.984	716.212	1331.73	1301.76	1785.49	1217.24	1407.18	3999.82	821.939	2485.5	561.341	909.045	387.737	787.722	735.838	670.296	637.972	1404.01	776.811	1057.24	1142.49	1111.5	763.692	1115.88	981.803	1729.04	1369.24	1346.5	1166.05	51.0838
3843	IPO5	NM_002271	862.651	274.543	203.152	350.956	769.463	211.693	126.36	300.513	421.466	377.268	361.438	306.176	329.777	643.093	565.33	370.573	412.212	499.576	358.797	2091.76	301.475	347.955	682.557	332.905	311.995	474.289	267.749	256.944	278.094	240.101	774.023	381.06	260.7	284.557	458.351	1639.21	401.592	167.449	403.754	270.505	693.218	500.169	489.86	466.402	76.8139
3845	KRAS	NM_004985 /// NM_033360	517.341	272.615	307.419	303.217	883.06	829.358	1575.18	829.571	1375.12	1662	445.768	485.149	715.418	987.17	980.99	760.984	679.939	643.729	517.227	585.311	614.366	1076.05	1015.09	542.283	1174.5	294.258	348.336	278.036	384.549	426.924	285.411	412.845	339.51	189.847	883.411	271.583	1118.82	240.128	593.393	697.639	754.265	583.174	728.427	665.335	54.0538
3858	KRT10	NM_000421	887.953	930.349	968.824	2099.56	1617.27	1281.36	443.152	924.116	2079.9	1489.29	1233.49	702.41	801.198	723.021	820.235	623.148	531.648	635.763	1332.35	1049.03	11302.3	5919.46	784.055	1860.23	2450.84	898.609	591.71	668.261	1200.41	974.931	698.78	1575.56	759.738	1063.2	17837.7	1300.56	3817.8	926.949	1318.21	784.064	909.21	1014.98	29091.2	2533.09	203.688
3895	KTN1	NM_001079521 /// NM_001079522 /// NM_004986 /// NM_182926	2489.56	1095.2	1353.86	1004.39	2090.06	1236.16	590.538	1012.86	1822.12	2234.37	1032	1213.35	957.735	1102.27	1944.58	1422.84	926.822	2652.59	2163.62	2205.3	1592.34	3123.5	2258.36	824.751	2728.25	1659.95	1489.46	1221.53	1787.01	967.619	4514.52	1161.29	1170.42	1081.29	2320.59	2523.26	1231.42	1095.63	1404.02	1080.49	2137.27	1478.59	2299.29	1667.47	45.529
3916	LAMP1	NM_005561	3393.78	2670.73	2439.8	2795.8	2439.04	4600.64	4998.22	2634.81	2222.84	1725.21	1968.33	1771.81	1053.46	2017.71	2571.45	2348.35	1609.56	3616.11	4484.35	2898.53	4808.12	4248.24	4404.97	5749.67	3138.08	1820.83	3533.59	3790.94	3151.29	2671.53	971.801	3803.07	3398.81	2838.11	4639.5	2765.62	4557.69	2413.92	2667.72	1918.52	2596.69	3143.26	5017.43	3076.98	37.1433
3920	LAMP2	NM_001122606 /// NM_002294 /// NM_013995	749.059	561.446	278.17	266.677	1413.84	1325.31	3800.03	974.59	395.977	231.311	594.192	600.233	139.507	484.251	1141.41	897.63	393.899	1764.24	967.562	1163.07	967.976	917.512	1240.22	1041.46	1651.33	263.638	916.588	1213.27	650.463	312.568	373.672	1099.99	1329.97	756.455	1298.33	180.213	969.24	405.175	853.027	1236.93	304.6	832.245	1294.35	889.573	69.917
3921	RPSA	NM_001012321 /// NM_002295	9701.26	12594.9	9685.47	25420.3	21379.9	10828.5	10237.8	16209.5	17202.5	22488.5	10982.1	5640.45	3431.82	7230.84	6776.71	4419.54	5966.83	8860.26	14264.9	13743.6	18405	17053.6	9727.86	13938.2	17806.6	5302.19	6417.77	5635.67	13634.3	11358.1	9933.51	14501.9	7117.76	9025.08	11960	4729.7	13217.8	7353.58	13440.1	19890.6	12515.9	11046.2	19595.1	11876.1	44.7385
3927	LASP1	NM_006148	2731.8	1333.72	1127.65	1689.81	5642.39	2790.07	6512.12	2874.18	2605.39	2070.94	1324.79	854.036	631.074	1329.8	1192.05	1075.78	1121.59	1249.09	2033.73	1287.12	999.167	4054.94	938.037	1568.98	1438.11	834.028	1323.8	1134.58	1594.75	2073.27	642.583	1474.47	1293.21	648.541	1704.21	278.79	2916.48	833.218	2629.36	3745.58	9270.58	2039.68	1331.18	2005.69	84.5225
3930	LBR	NM_002296 /// NM_194442	740.127	321.901	776.617	4227.65	3987.72	2956.27	5645.33	3752.5	2853.19	1930.06	1987	281.295	167.978	428.458	479.314	455.436	307.176	472.441	503.676	429.368	627.662	1369.5	1475.82	640.142	646.843	327.929	573.273	593.041	604.101	1475.2	225.781	1385.87	524.393	731.371	874.507	649.982	3389.39	170.326	2454.84	3829.24	2909.48	1311.04	599.613	1397.51	97.7395
3939	LDHA	NM_001135239 /// NM_005566	11293.6	9642.5	3687.17	6224.46	13066.2	7084.35	3527.35	5059.86	6448.37	11283.2	5676.67	3479.07	2864.11	5410.15	4800.56	3900.31	4182.17	4511.19	6362.04	13703.1	12679.1	12229.8	6126.04	11807.3	6180.18	5603.33	4983.83	6269.64	4171.27	3345.04	16257.5	9004.14	3776.43	3393.53	8336.29	3533.83	9979.68	3688.25	8006.63	7220.16	13803.3	6010.11	10020.6	7177.5	49.5341
3945	LDHB	NM_002300	10961.5	9506.28	5753.02	7702.27	11008.5	3903.48	3051.93	7508.58	10807.7	12294.3	5851.17	5786.83	5081.12	9152.56	8507.84	6663.25	7044.07	10074.3	6157.81	6268.91	3443.22	3313.54	4953.6	3579.2	2610.28	8869.55	10062.7	530.54	6589.35	5027.7	3907.8	5087.5	4834.52	3399.95	2892.46	2001.95	9963.39	2945.03	6728.3	7810.68	4827.43	6056.53	2218.5	6156.73	46.8211
3956	LGALS1	NM_002305	16956.8	2795.9	2406.53	924.307	5151.65	8813.26	1171.73	3371.2	1131.94	3851.15	2221.35	645.4	406.519	2212.52	2010.67	2053.58	1787.59	4511.99	2708.39	10435	3211.91	3839.5	5076.97	2510.55	8979.98	5786.65	764.227	1786.79	3286.34	2042.34	8025.22	360.052	3436.43	5573.4	5395.99	1520.43	5435.62	936.971	1265.11	2458.61	13113.3	12307.8	10456.5	4259.03	89.716
3958	LGALS3	NM_002306 /// NR_003225	10369.3	1204.4	4085.77	838.161	6845.73	10659.4	3128.29	4148.69	1311.53	1130.69	1543.38	617.661	906.164	756.797	1181.94	1049.2	888.711	1314.42	6092.7	6984.78	9447.52	30209.6	4152.06	12187.5	6485.65	3763.65	2267.49	343.635	10354.9	2011.04	2080.76	8426.42	4188.15	3410.51	10309	1565.7	1830.1	1792.72	3775.07	15021	2225.95	5379.31	12190.6	5080.84	108.844
3988	LIPA	NM_000235 /// NM_001127605	2619.21	1451.6	1210.5	1739.58	4908.58	5342.28	1094.72	2630.98	1834.94	1238.92	2574.3	1436.57	635.99	1288.18	1894.89	1993.93	1155.02	2713.2	1259.69	711.991	995.766	664.98	795.082	1094.19	1026.79	823.713	871.601	2436.63	2273.85	3471.75	417.34	1404.68	1672.06	774.863	1307.14	280.669	1555.55	1149.07	1784.01	1545.23	367.607	1470.25	1340.96	1610.67	65.2043
4043	LRPAP1	NM_002337	562.273	964.872	414.139	514.339	2423.9	2260.17	893.415	686.076	621.443	586.007	690.89	1612.23	384.645	905.119	788.103	420.775	493.527	423.58	683.183	694.667	569.791	363.522	1008.8	472.053	431.495	787.595	921.327	375.683	1034.12	329.304	139.419	863.985	1858.56	993.299	476.264	680.929	747.213	879.618	670.976	679.28	236.278	826.406	627.629	767.37	61.9906
4048	LTA4H	NM_000895	1311.77	1656.45	1138.2	5714.44	9236.18	10470.8	3104.21	5142.58	2202.86	1426.21	3047.01	502.306	710.021	763.505	841.726	632.049	452.514	649.199	1969.98	1885.58	2752.25	1356.23	1301.48	4603.73	2073.81	809.359	900.233	289.727	2527.93	1565.58	742.351	1061.6	351.329	971.96	1435.18	533.408	1127.41	816.917	3038.61	4946.91	1399.86	1115.32	1596.75	2097.11	104.186
4076	CAPRIN1	NM_005898 /// NM_203364	1666.65	589.646	717.085	779.875	2097.5	1182.97	1475.26	975.877	943.549	692.979	1349.91	605.854	613.911	838.696	667.302	901.283	586.338	760.212	810.069	2450.62	1208.79	781.602	1657.36	1162.1	322.873	974.388	733.107	428.302	691.122	838.389	646.31	271.387	1329.9	837.332	1114.21	2820.25	740.517	509.298	1517.86	572.79	694.167	1860.22	1140.37	1012.98	53.8474
4077	NBR1	NM_005899 /// NM_031858 /// NM_031862	904.391	481.781	387.43	314.015	1293.56	749.02	2063.06	708.088	791.145	423.013	431.517	512.847	503.759	558.621	634.839	643.755	395.966	869.417	752.935	1292.93	420.51	696.06	785.898	467.979	285.084	638.51	607.77	449.253	485.705	522.395	418.996	455.461	763.104	489.024	770.223	1865.72	567.026	256.509	758.421	1197.05	676.837	717.75	684.152	690.5	53.63
4087	SMAD2	NM_001003652 /// NM_001135937 /// NM_005901	854.067	486.992	312.806	663.282	1350.16	852.596	1006.62	637.175	972.485	661.691	420.786	292.711	200.047	419.591	514.117	476.056	322.5	543.239	775.739	681.98	594.847	590.644	668.009	649.003	947.526	451.635	313.143	152.561	579.801	382.866	316.554	726.969	544.418	288.346	706.825	472.544	1333.49	282.552	661.027	591.144	384.824	513.59	572.452	585.335	45.2884
4116	MAGOH	NM_002370	281.363	164.36	138.102	344.06	1078.41	518.208	471.746	365.969	791.538	1418.77	393.791	114.112	153.805	165.262	177.361	133.988	108.01	158.893	301.969	570.395	373.629	167.359	390.881	297.086	363.145	155.345	189.156	273.56	248.184	214.059	138.834	261.748	342.284	221.607	403.899	219.034	854.237	123.792	567.179	179.285	317.923	430.957	454.574	349.718	76.092
4123	MAN2C1	NM_006715	351.969	466.043	356.508	266.093	503.659	366.873	285.954	340.762	539.463	509.709	458.865	419.624	510.562	271.85	299.851	410.035	359.332	249.978	338.228	264.001	301.089	141.025	258.227	342.135	236.768	557.803	378.671	568.411	419.196	538.828	241.982	200.272	280.839	399.063	236.883	449.169	328.394	756.559	373.911	349.647	292.351	416.631	185.627	367.973	33.3632
4140	MARK3	NM_001128918 /// NM_001128919 /// NM_001128920 /// NM_001128921 /// NM_002376	269.994	279.352	210.065	400.05	747.094	415.562	795.433	435.893	444.643	548.343	316.249	310.299	511.974	389.842	386.069	235.156	300.991	378.706	297.428	760.923	360.741	294.961	306.369	186.156	220.781	331.849	219.928	176.784	271.692	240.106	330.142	206.284	261.314	245.408	307.184	316.536	330.997	180.56	412.802	1787.4	348.583	363.94	300.695	382.216	68.5521
4141	MARS	NM_004990	199.463	254.007	282.111	495.622	1613.6	399.121	800.515	536.095	636.813	642.933	443.542	333.782	553.934	586.486	644.756	338.403	408.817	485.529	268.611	1166.82	336.306	348.493	442.757	268.821	258.439	254.363	189.143	196.148	282.611	341.99	236.703	281.039	263.051	281.558	279.79	388.556	346.337	225.561	712.002	443.681	260.723	325.581	353.858	428.104	62.1846
4144	MAT2A	NM_005911	670.82	760.886	770.336	540.604	1984.93	539.763	540.076	696.186	425.542	200.204	403.927	458.214	555.978	627.679	902.663	536.837	467.488	1266.39	855.571	1026.98	1559.84	546.337	1436.09	609.53	541.4	499.994	937.191	472.274	446.047	410.521	458.794	830.829	439.911	741.246	925.766	656.48	363.329	415.849	1062.9	355.747	515.671	878.409	929.25	703.825	50.0038
4154	MBNL1	NM_021038 /// NM_207292 /// NM_207293 /// NM_207294 /// NM_207295 /// NM_207296 /// NM_207297	1424.38	199.224	383.551	1287.53	2473.57	1263.42	2757.24	2086.36	2939.44	3350.57	848.26	302.86	204.657	335.233	494.559	320.961	217.42	465.716	418.867	1655.09	544.101	1078.75	1686.01	334.682	789.379	556.326	253.077	199.1	299.977	1214.02	1269.36	282.706	208.664	442.851	1193.45	120.514	542.087	237.057	1398.11	2514.26	3322.37	686.308	1151.3	1017.52	90.0062
4170	MCL1	NM_021960 /// NM_182763	1291.65	1063.43	1444.07	1537.26	4503.38	4819.38	15520.2	4037.69	3247.16	2760.01	5711.54	305.008	302.551	300.561	445.307	562.138	288.927	591.492	2597.62	1575.05	3054.07	1673.45	1186.54	1554.7	656.924	821.931	1054.82	1238.5	1367.5	1751.74	781.988	1603.36	1590.46	1118.97	1408.66	640.396	2073.3	733.999	3555.58	4658.26	1756.94	1743.55	1040.97	2092.35	119.212
4179	CD46	NM_002389 /// NM_153826 /// NM_172350 /// NM_172351 /// NM_172352 /// NM_172353 /// NM_172354 /// NM_172355 /// NM_172356 /// NM_172357 /// NM_172358 /// NM_172359 /// NM_172360 /// NM_172361	1337.85	819.442	518.034	234.983	1262.78	596.775	5967.1	1019	770.917	848.892	540.637	183.541	156.731	237.748	305.184	258.767	184.961	497.362	481.471	645.912	628.08	542.988	1420.94	534.303	142.224	440.926	727.959	452.104	381.378	319.358	216.888	405.935	2433.38	570.77	796.346	353.514	149.881	146.701	519.108	662.019	375.229	752.11	913.986	715.214	129.265
4189	DNAJB9	NM_012328	431.674	679.613	441.867	436.612	886.934	830.442	1308.81	611.658	1298.4	1512.05	1474.96	444.249	393.515	732.329	495.215	579.734	519.647	398.887	887.858	1739.37	515.404	229.096	702.633	393.923	348.802	576.507	545.021	771.282	593.313	857.757	460.668	821.739	1562.46	413.325	308.795	399.71	786.753	571.516	866.74	388.933	352.403	703.555	373.432	689.479	53.7979
4190	MDH1	NM_005917	9422	5467.31	1519.08	3413.94	4516.88	2265.89	940.427	1771.87	2558.66	4036.8	1805.87	4972.75	3840.56	10653.2	7937.7	4374.28	7283.63	6077.3	2063.07	1922.13	3505.56	3087.43	3019.63	3563.36	1961.23	9209.53	4418.04	1931.59	2542.64	1798.14	10501.6	755.593	2095.06	1843.14	2326.66	1032.52	5085.61	1392.2	3092.28	1349.96	1705.85	2167.48	3683	3695.61	70.4611
4191	MDH2	NM_005918	1084.54	1752.2	422.26	919.671	2692.79	952.67	537.584	635.288	939.672	650.71	668.634	902.537	769.167	1382.06	1498.66	840.537	1169.75	1116.91	853.553	777.876	1092.29	1685.57	683.783	2466.04	715.754	2231.97	1178.13	1568.97	922.279	589.509	4998.19	499.26	584.018	891.734	1121.64	633.703	783.511	598.581	1419.52	651.846	814.98	932.558	1570.38	1144.22	69.2382
4201	MEA1	NM_014623	995.156	959.76	569.543	570.892	1231.35	998.905	696.469	603.702	913.441	584.564	668.57	998.845	671.629	1498.71	1496.21	1146.55	1139.26	1525.98	1181.56	755.612	1369.16	1278.23	965.604	1734.23	1700.93	496.301	609.851	310.813	1282.74	686.472	200.47	333.864	945.251	921.312	849.893	5568.26	1124.39	733.113	990.711	914.526	1499.38	1039.73	1579.88	1077.72	73.9632
4218	RAB8A	NM_005370	629.895	1360.03	590.458	1398.41	1604.69	2767.25	3730.25	2085.96	1372.6	1479.28	1591.48	569.095	550.21	614.187	675.288	619.781	497.054	733.587	809.95	800.206	976.173	1951.93	874.47	1458.4	574.251	599.638	1092.13	1824.75	1001.57	1045.25	314.688	404.329	976.707	1033.35	786.244	933.437	936.663	511.607	1242.41	1612.55	1204.76	1022.72	776.319	1107.77	58.984
4236	MFAP1	NM_005926	662.146	671.993	752.401	559.84	254.919	461.095	686.168	644.176	809.642	734.966	594.111	596.178	654.585	750.986	623.403	725.287	678.498	541.347	915.937	1340.35	1083.38	720.831	615.085	794.014	1347.67	721	671.708	504.454	956.745	626.092	675.399	907.362	770.341	835.308	747.134	744.82	1120.76	703.994	865.057	737.538	920.275	789.369	642.086	747.871	27.245
4245	MGAT1	NM_001114617 /// NM_001114618 /// NM_001114619 /// NM_001114620 /// NM_002406	672.568	439.556	591.063	304.912	1810.71	1754.23	1164.94	938.983	567.184	369.757	665.482	119.43	216.702	212.038	275.033	160.305	184.296	320.158	331.1	649.936	490.453	380.54	350.945	1204.22	145.184	536.741	277.036	544.595	708.395	842.019	202.138	236.696	1865.52	632.434	560.093	177.317	601.762	504.668	1000.94	1022.9	612.73	540.804	553.77	598.611	72.2916
4259	MGST3	NM_004528	7120.96	2813.11	1267.77	221.725	821.932	1545.56	477.379	576.174	563.134	589.693	721.434	2034.49	1422.35	4246.25	2920.26	2669.92	3137.37	3661.73	1798.3	1317.34	2753.73	5477.78	5172.32	3473.62	845.273	5877.43	3083.07	2371.23	2904.76	993.295	7559.38	538.765	3599.43	2053.76	2099.02	1298.48	2659.85	2124.71	565.126	810.958	1559.66	1702.43	2479.73	2370.48	74.9279
4267	CD99	NM_001122898 /// NM_002414	4434.28	1567.47	1808.05	870.226	2021.06	2889.91	2234.36	3025.65	3386.59	3472.38	1797.1	1361.68	730.3	598.984	1505.63	2104.96	765.171	2175.81	1116.43	4473.44	2096.55	1995.92	3008.8	4467.35	1224.69	2823.55	1177.73	2854.57	2197.92	2587.61	1780.88	1914.1	1937.31	3006.61	3739.25	2768.08	6543.95	1955.72	1805.35	2513.04	5139.94	3123.77	3608.82	2479.33	50.4854
4282	MIF	NM_002415	1143.89	7015.73	2528.46	2113.25	1420.04	1093.46	1435.37	1838.81	3316	1245.98	3569.16	2806.48	2020.58	3713.63	4790.43	3155.01	3391.19	4518.31	2636.92	6708.77	6539.15	2187.52	8334.45	9295.33	3213.49	2348.82	4580.05	3745.17	3023.56	1984.41	674.235	1749.1	3435.12	4472.65	2634.08	1782.84	4238.1	4540.19	2500.51	1957.24	4988.42	4848.38	3484.1	3419.03	56.5772
4292	MLH1	NM_000249	845.011	772.997	508.314	1249.21	1453.46	1059.84	428.082	656.393	1019.56	1223.62	781.689	665.512	766.019	852.344	784.828	765.735	499.897	770.116	938.802	1046.7	934.203	583.752	822.911	885.528	1321.01	1123.41	519.46	619.015	979.114	651.275	1396.62	508.432	989.647	574.545	722.892	1449.25	1116.83	281.914	1018.9	698.947	1322.91	917.918	746.358	866.813	33.1137
4296	MAP3K11	NM_002419	308.552	350.171	287.822	448.201	393.577	927.77	1452.57	658.14	495.269	427.686	509.654	386.77	295.522	296.973	287.247	386.414	340.865	386.623	414.475	212.966	409.883	561.019	171.925	365.436	457.659	368.068	441.484	596.243	579.49	706.147	140.699	475.888	342.004	533.575	274.387	396.723	511.835	700.891	453.187	448.038	466.551	361.271	337.745	450.405	47.7502
4329	ALDH6A1	NM_005589	1696.49	415.758	255.082	142.457	239.116	182.661	119.683	221.932	275.687	136.447	316.049	1527.73	858.126	1057.85	1599.1	1711.13	958.597	2165.04	504.138	271.425	258.604	270.553	843.304	557.156	330.819	801.489	4100.83	4671.96	344.764	286.821	522.683	144.981	211.211	482.475	409.305	585.33	270.723	254.753	219.381	206.223	418.911	737.768	632.411	749.232	127.197
4363	ABCC1	NM_004996 /// NM_019862 /// NM_019898 /// NM_019899 /// NM_019900	508.876	419.547	572.55	1058.23	6478.04	6513.37	8242.66	4077.28	2766.27	2342.49	1555.53	229.816	193.681	158.479	259.876	294.635	214.47	306.508	355.874	700.975	562.521	264.021	406.526	526.055	422.764	345.197	225.881	248.879	666.641	1625.83	326.195	362.427	415.834	435.311	409.47	345.27	923.293	427.903	2378.56	3917.65	280.104	416.393	456.45	1247.4	150.604
4478	MSN	NM_002444	2643.76	1110.48	936.218	2143.48	6818.67	4929.23	10310.9	5670.34	4733.92	6657.32	2586.07	720.279	362.857	380.618	922.045	1299.81	375.133	1366.71	1027.79	3794.12	1056.76	1194.85	1618.33	1330.17	1205.05	1762	2026.86	700.266	1377.08	3329.81	660.035	507.805	895.272	761.133	1988.57	247.204	2877.46	1193.51	2969.01	6877.17	3653.6	1950.54	1909.46	2346.09	93.5387
4482	MSRA	NM_001135670 /// NM_001135671 /// NM_012331	537.027	596.301	303.817	421.995	951.249	784.658	585.992	437.17	366.007	193.302	637.545	571.663	1023.43	821.893	793.888	593.61	784.757	554.359	778.755	279.452	416.353	502.667	283.081	780.178	512.111	782.084	2761.04	1692.29	563.504	329.994	385.041	552.458	263.606	444.431	362.593	253.288	648.363	507.498	458.136	789.526	385.121	346.276	369.427	614.092	69.7518
4502	MT2A	NM_005953	6711.8	22219.1	5917.85	866.476	1177.7	2935.15	2213.1	1716.06	2620.61	4863.09	1714.95	6337.53	2529.27	3844.9	7823.88	8479.99	4940.87	12751.9	8012.51	18922.5	8318.78	9743.36	5005.68	11622.6	2074.4	4007.76	17538.9	29470.1	11875	1897.26	5092.34	14009	1497.36	10520.7	4051.38	929.29	5631.2	14832.5	1427.78	1192.84	11179.5	5234.88	2746.51	7127.87	88.6701
4548	MTR	NM_000254	453.791	195.895	210.701	691.89	577.084	201.747	143.643	340.498	669.053	555.892	329.24	182.819	132.962	204.408	314.164	204.996	145.862	406.014	343.816	802.965	164.881	267.656	1138.47	111.709	294.163	379.508	285.739	163.648	184.738	339.201	339.193	515.422	513.392	227.724	486.117	390.677	205.785	193.989	537.457	273.06	381.84	567.957	414.792	360.106	57.7094
4591	TRIM37	NM_001005207 /// NM_015294	419.714	403.148	239.937	539.193	598.361	171.132	291.097	286.608	766.132	654.731	325.585	1566.33	2186.52	3326.82	3122.21	1604.62	2528.54	1668.01	1323.99	621.396	428.588	399.496	748.184	289.798	979.659	502.638	247.561	130.88	485.738	294.923	375.736	632.585	521.181	419.282	727.985	1812.05	2098.1	121.024	469.095	294.611	699.655	651.987	385.916	845.599	94.3717
4601	MXI1	NM_001008541 /// NM_005962 /// NM_130439	1477.96	1318.24	868.735	712.216	502.388	955.491	4844.52	2234.44	1910.64	2505.42	1364.28	2842.97	2698.87	2513.38	2841.04	2913.97	2174.02	3680.63	1745.27	2408.48	2014.36	4494.86	2850.49	2624.85	1044.83	1884.46	1069.15	1502.26	1055.67	853.668	1271.06	970.555	803.552	933.732	1867.7	915.6	1043.32	1521.03	511.379	22660.3	2055.52	974.375	1927.89	2310.78	144.143
4615	MYD88	NM_002468	845.568	781.579	1307.03	1926.22	8450.22	6828.64	9657.59	3971.64	2051.07	1960.99	1756.67	502.021	516.996	369.803	352.966	517.853	392.44	377.852	1019.87	434.388	2256.72	2174.87	644.148	2732.32	1394.77	698.175	798.436	1940.63	1675.01	1674.6	573.31	1182.27	1187.75	845.925	995.2	597.853	1829.71	827.362	3382.63	4027.01	992.895	1112.22	1009.24	1827.31	111.464
4627	MYH9	NM_002473	1022.79	576.448	670.577	839.648	943.056	1908.22	5519.72	1683.6	1995.9	2093.76	916.51	161.617	136.076	162.25	173.116	326.079	150.673	312.067	780.985	1397.83	775.849	924.524	635.737	1049.9	225.284	667.717	863.351	506.303	612.828	1573.76	199.64	183.463	1015.78	575.923	562.062	199.747	1072.14	746.659	967.721	1022.67	1676.7	1270.06	1009.28	932.745	95.4522
4637	MYL6	NM_021019 /// NM_079423	13503.9	7770.91	6091.49	5861.17	19460.4	10223.2	10065	8671.85	8429.64	12322.2	4992.63	2248.16	2612.39	3261.25	3715.96	3279.42	2830.99	6130.08	8225.36	6855.82	12218.3	22508.4	10113.5	11268.6	7695.33	3621.9	5903.23	5859.25	9031.29	5090.14	3507.66	6281.45	5088.22	9648.46	7644.41	3590.05	8455.02	4862.37	8963.85	26015.6	39714.3	10994.8	10418.4	8954.56	77.3771
4666	NACA	NM_001113201 /// NM_001113202 /// NM_001113203 /// NM_005594	13083.8	14644.9	8852.44	21078.5	25619.4	20726.4	9564.79	16464.8	18146.7	24319.4	11616.1	4723.8	6270.53	7935.14	7286.03	5339.34	5460.32	8940.85	13226.8	18191.4	19327.6	11887.9	12586.1	14117.6	13864.6	6784.69	6913.37	7064.75	9136.68	11115.8	7228.81	7431.5	7819.5	10081.7	13443	5440.07	9379.2	4955.06	12932.9	19542.6	14473.4	11489.2	22731.9	12121.8	46.4585
4670	HNRNPM	NM_005968 /// NM_031203	382.2	450.624	490.853	723.121	4443.44	854.266	953.761	764.467	1435.38	944.968	675.449	176.962	346.768	353.172	250.079	195.036	230.437	340.059	518.005	1060.19	563.179	387.782	675.419	371.757	289.379	236.833	214.2	323.767	437.684	428.664	172.999	196.258	483.26	482.136	754.081	512.198	613.385	300.014	1354.96	620.756	734.355	797.242	814.105	636.131	104.743
4673	NAP1L1	NM_004537 /// NM_139207	2233.88	2040.42	1238.21	5507.7	8975.6	4031.82	1515.7	4019.83	5520.85	5531.3	2194.19	1718.78	1157.76	2185.2	2192.43	1701.04	1500.1	2419.77	2509.93	5349.42	1760	1369.21	2606.43	1249.55	2342.01	1761.89	980.747	491.406	1794.57	2842.66	1391.74	1463.16	1185.4	1489.61	1929.68	1124.35	2815.44	856.963	3654.94	2410.27	3972.09	2841	2325.48	2516.34	65.4433
4677	NARS	NM_004539	2835.41	2133.67	1576.2	2378.47	4090.78	4024.18	1513.92	2382.97	2308.17	2560.68	1989.77	2671.34	2387.76	4026.61	4747.65	2684.98	3190.18	3543.14	4526.09	3334.49	3763.04	3903.83	2899.81	2579.13	4237.83	2317.89	2952.26	1142.95	3005.95	1650.48	2488.83	4457.49	1678.92	2211.99	2360.74	1072.51	4800.98	1752.68	3244.48	3170.47	2114.67	2283.01	3178.28	2841.27	34.3643
4683	NBN	NM_002485	584.554	150.912	144.816	443.303	686.206	629.87	1250.6	569.046	448.106	528.835	389.191	282.581	210.517	278.131	430.099	272.349	182.569	337.012	395.675	349.421	240.92	272.564	600.912	276.362	489.216	253.122	271.152	164.463	199.938	325.732	188.794	196.886	224.848	161.96	339.126	233.028	162.084	148.448	454.033	491.103	425.643	411.728	342.155	359.023	56.3122
4691	NCL	NM_005381	3557.1	3545.98	1702.76	3167.44	6605.38	3082.98	1831.74	2955.22	5644.15	5661.87	4573.38	2003.97	2504.75	2550.77	2458.79	2326.15	1970.21	2732.89	3456.3	5184.68	4084.25	2519.47	2671.76	3365.25	3473.49	2313.8	1988.16	2161.31	2990.42	2957.04	2351.2	2290.23	2606.74	2365.63	3089.3	1990.99	4174.45	1503.25	4783.82	2638.47	5291.88	3629.29	3023.15	3157.67	37.7365
4694	NDUFA1	NM_004541	3747.76	2327.81	1619.85	1660.98	7069.28	3878.89	3390.53	2094.05	4057.16	9348.21	2135.43	1955.1	1967.63	3012.18	3916.45	1768.44	2336.33	3613.27	2505.21	2965.77	3697.17	6703.09	2920.07	6572.68	2541.97	6774.06	3880.75	2259.98	3111.72	1641.4	10300.9	1622.4	1285.61	2252.79	2147.46	698.079	5499.61	1441.15	3154.36	1814.28	1870.94	2849.58	3625.93	3349.68	62.9295
4695	NDUFA2	NM_002488	1747.39	1726.77	877.881	1305.81	2180.13	1749.24	1790.75	1302.65	1482.63	2003.06	1085.23	929.066	897.125	1341.99	1701.62	989.227	1189.13	1772.4	1098.58	750.395	1609.42	2017.04	1767.73	1627.49	916.623	1836.87	1952.71	2467.01	1786.81	835.94	3648.43	901.354	854.303	1372.28	979.567	1533.18	1774.16	1217.42	1248.05	2707.73	1107.73	1281.71	1297.67	1503.77	37.8457
4696	NDUFA3	NM_004542	1543.56	1541.92	539.408	613.469	1261.94	1574.45	1300.6	1287.87	1411.55	2980.22	839.801	1485.93	695.178	1573.62	2179.96	1315.55	1406	2333.09	743.418	491.652	1215.82	1708.27	1413.57	1490.58	653.934	2115.14	1501.05	1603.68	1436.99	831.911	3925.63	382.846	640.352	904.646	625.21	1494.66	1773.13	1108.6	877.704	2845.57	1127.5	1006.03	1310.89	1374.72	51.1694
4697	NDUFA4	NM_002489	5744.04	2411.92	1967.93	1644.39	5625.2	2555.66	963.136	2072.81	3384.68	9092.56	1881.79	3517.25	3574.36	7010.22	8079.08	2883.01	4959.73	7544.43	3133.87	2146.38	3232.16	4426.47	5270.48	3009.4	1975.62	7022	4025.06	3973.91	3318.16	1631.43	13137.4	2237.32	1599.71	2864.98	2906.36	1247.06	4776.77	2529.8	3035.77	2493.22	9672.33	3126.26	4236.67	3998.62	63.7358
4700	NDUFA6	NM_002490	1410.12	985.618	534.492	904.964	1836.29	1208.62	532.61	777.322	1198.61	2896.31	606.974	722.67	657.979	954.316	997.611	690.733	790.983	1079.52	878.679	1127.38	1637.55	1760.1	915.659	1437.52	2046.98	1896.65	946.647	915.196	876.958	430.11	2765.82	927.061	1051.58	708.451	1059.6	511.841	1710.7	586.936	861.497	717.305	1064.84	839.652	1325.44	1111.3	49.7371
4702	NDUFA8	NM_014222	1217.4	1422.93	634.574	743.005	1180.41	705.928	154.847	466.914	327.589	207.999	631.901	1241.2	805.599	1691.12	1732.4	1083.72	1453.77	1518.24	687.982	645.655	801.604	1102.84	915.608	1348.93	798.483	2280.22	715.862	743.584	1201.28	283.23	2958.94	349.842	654.06	780.675	739.854	1674.06	2562.57	587.508	809.31	359.318	575.028	712.628	935.446	987.071	61.347
4706	NDUFAB1	NM_005003	3423.42	4082.46	1807.05	1973.42	3679.19	2672.09	829.81	1738.66	2163.04	1591.69	1831.15	2171.7	2353.22	4192.51	3408.61	2057.69	2985.15	3024.06	2225.96	2248.71	3133.37	4954.58	2527.28	3413.9	2601.76	7155.46	3228.2	3474.53	3139.7	1332.26	8807.4	1466.39	2002.07	2102.31	2276.89	1961.45	3271.51	1694.85	2265.19	1610.39	3423.07	2534.83	3629.82	2848.07	50.7542
4707	NDUFB1	NM_004545	4194.97	2602.56	1436.46	2518.05	4203.46	3499.54	2848.84	2238.21	2946.08	5561.64	1685.05	2190.04	1793.67	3039.11	3479.69	1896.71	2485.82	3479.4	2319.79	1675.47	4072.19	4866.76	3698.27	3436.57	3575.08	4649.96	3172.34	3232.86	3014.44	1721.75	6279.72	2729.75	1148.63	1887.38	2731.13	1227.15	3593.73	1806.18	2592.95	1667.06	2223.58	2459.05	3373.02	2912.89	39.0534
4708	NDUFB2	NM_004546	2384.58	3451.77	1876.44	1937.74	4219.32	2601.21	852.484	1511.31	2412.43	3331.49	1556.69	2470.38	2122.37	3048.45	2330.83	1692.37	2431.57	2676.07	1817.34	1143.58	3749.13	3114.19	1478.48	2568.62	2071.8	4160.54	2981.03	2779.61	2390.98	1150.32	5859.17	1440.25	1278.25	2096.93	1597.13	1358.97	2562.21	3317.52	2252.29	987.829	1975.6	2124.92	2129.55	2355.67	41.5644
4709	NDUFB3	NM_002491	1423.66	1010.37	594.877	917.827	1004.85	1656.79	1771.37	956.227	835.047	2102.87	1042.81	855.397	853.188	1431.13	1091.2	867.757	953.039	1248.17	1071.53	385.919	2193.71	1455.43	963.712	1754.08	1231.57	2186.74	1368.4	1019.22	1360.94	711.884	4304.17	978.997	919.032	689.553	789.035	990.436	3351.79	786.407	869.313	1036.55	838.235	834.769	1330.23	1256.7	56.7038
4710	NDUFB4	NM_004547	3973.09	7866.77	2217.22	1703.06	2548.73	2885.87	1848.32	2472.15	2767.5	5797.86	2169.24	2361.79	3049.63	3535.98	3717.76	2335.97	2673.66	4285.19	2359.93	3899.19	4945.19	5289.64	4581.53	5260.7	2539.04	5988.47	3745.3	4203.02	2924.65	1786.96	10711.3	1716.92	1906.14	1954.61	3263.68	3004.42	4342.35	1707.69	2140.87	2634.39	2797.36	3390.29	5445.74	3505.8	50.9877
4711	NDUFB5	NM_002492	3708	2475.64	1297.74	1924.28	4919.42	2769.66	1111.37	1729.57	1672.59	1092.08	1288.13	1906.95	972.021	2086.42	2298.15	1589.07	1805.01	2313.65	1527.52	1690.78	1618.45	2561.69	2122.37	1754.55	1483.46	3174.5	2228.92	1737.73	1652.15	966.336	5067.3	1295.31	1275.67	916.44	1897.27	1478.71	2689.97	1065.75	2206.18	1346.14	1256	1550.8	2654.21	1957.63	46.7306
4712	NDUFB6	NM_002493 /// NM_182739	1423.73	1010.04	436.738	693.656	1333.94	660.36	1975.53	982.983	1220.34	1379.2	799.885	843.28	743.429	1294.15	1094.39	928.786	780.506	1384.94	921.65	1264.14	1697.65	1353.33	1222.77	1249.23	1163.1	1788.68	1063.55	1500.73	990.892	479.686	2632.38	672.676	669.816	840.312	1116.03	1283.05	1746.37	617.856	886.271	1242.59	1254.1	1254.75	1488.12	1148.5	36.9329
4714	NDUFB8	NM_005004	2715.93	3973.55	1506.93	3031.25	6179.73	3255.5	1208.71	2320.72	3374.35	4261.62	2040.4	2813.04	2419.7	4279.77	4546.77	2303.28	3451.59	3830.58	2788.37	3637.19	3393.94	3370.07	2095.58	2695.26	3582.17	2834.45	2439.71	2844.64	2637.41	1465.15	3028.15	3506.42	1093.31	2602.92	2196.03	927.759	4924.66	1706.67	3146.68	3895.43	2408.66	2083.49	3115.71	2928.68	35.9508
4717	NDUFC1	NM_002494	1832	4313.28	1516.71	788.56	2008.69	1594.75	1153.35	1156.81	1954.6	5284.86	1176.95	1362.94	1777.5	2302.91	2001.05	1470.01	1460.83	2010.82	1995.79	2054.94	4057.54	3510.51	2365.21	3435.77	2065.84	4166.07	3453.6	2315.93	2547.39	913.474	6866.3	648.702	944.753	1751.92	2115.07	2859.6	2517.26	1594.63	1631.1	1400.72	1177.36	1561.05	3741.19	2252.52	56.4404
4718	NDUFC2	NM_004549	3631.04	6223.69	1626.02	1363.47	4091.33	2003.26	1166.12	1690.21	2116.55	3842.41	1892.2	2062.75	2753.81	2883.76	2640.02	2219.1	2403.02	2264.8	2545.69	2504.37	2694.31	2537.98	2692.74	3782.41	1910.69	3063.03	2546.02	5822.89	2314.71	1487.39	5342.94	1696.22	1931.78	1813.75	2587.99	2237.37	3125.02	2508.87	2333.03	1802.88	2667.58	3279.69	3094.79	2679.02	40.6887
4719	NDUFS1	NM_005006	817.231	937.709	247.824	335.188	788.29	434.335	441.67	337.797	490.491	665.792	360.998	360.069	337.243	722.264	866.189	465.943	487.097	821.512	299.219	607.176	634.355	751.237	743.069	799.278	336.334	1805.49	885.258	749.346	313.229	243.922	2876.95	178.955	469.386	279.003	469.045	359.802	397.899	143.371	484.532	343.628	326.759	486.711	883.139	599.645	76.9427
4720	NDUFS2	NM_004550	1402	2125.03	641.641	1024.1	3365.95	1910.42	1090.13	901.155	1233.11	1024.6	1200.35	1050.57	1301.09	1714.74	1529.02	1171.5	1237.06	1361.36	1117.42	925.934	1444.55	1765.45	753.922	2266.91	500.995	2662.42	1923.02	2121.36	1261.47	954.346	3892.18	248.125	1033.47	1023.72	1143.25	692.913	1772.52	433.923	1634.1	1203.16	725.39	1146.14	1259.52	1376.51	51.7744
4722	NDUFS3	NM_004551	1085.71	1639.88	615.843	592.06	2532.5	1257.75	679.993	886.21	1244.04	1281.3	1247.93	1941.45	1431.81	1834.31	1721.33	1385.36	1666.33	1453.81	927.756	738.468	1513.59	1676.2	766.558	2098.66	1072.49	2414.3	1444.32	1902.51	1481.09	904.453	4479.83	504.203	673.754	1015.28	1003.25	1019.22	1884.12	1187.6	1245.05	806.475	816.028	1139.2	1293.52	1360.59	50.4481
4723	NDUFV1	NM_007103	1226.91	1689.25	694.981	1156.79	3369.18	1037.78	754.374	989.798	1260.06	1154.69	808.852	1054.35	1399.71	1707.2	1306.76	1158.72	1386.72	1522.85	1094.38	1011.5	1268.52	2071.54	898.635	2251.54	440.987	2450.88	1682.07	1707.88	1371.45	1119.46	2585.57	403.426	854.483	1184.77	1142.12	1017.43	1101.83	1150.46	1872.06	1350.39	994.786	1168.63	1508.42	1334.47	42.221
4724	NDUFS4	NM_002495	1698.46	731.387	787.517	506.343	785.24	943.196	256.872	549.288	643.77	1785.91	709.359	642.26	679.713	1228.52	1009.84	633.56	853	936.605	890.31	989.956	1276.55	1226.2	932.289	1215.77	812.966	1456.99	1117.5	964.084	876.38	550.309	3559.61	434.968	716.356	913.721	1010.73	625.523	1478.51	636.402	580.84	408.739	990.196	885.434	1438.41	962.083	54.9113
4725	NDUFS5	NM_004552	4905.61	3200.58	2651.63	1687.3	3649.98	2843.49	1024.14	2486.45	4409.3	12035.6	3040.56	3816.84	2892.01	5320.3	4696.65	2718.03	4014.34	4434.47	4211.29	3334.38	6320.34	5032.13	4994.08	6566.11	4040.23	5113.8	2688.49	2368.98	3952.15	1848.45	7581.39	2195.05	1665.69	3858.6	3077.84	1375.04	5724.64	1707.96	2755.05	1455.87	5435.39	4679.18	4629.63	3870.68	51.1639
4726	NDUFS6	NM_004553	1238.55	1589.83	771.667	2175.26	7685.21	2096.1	616.165	1195.69	1892.39	1245.58	1018.99	706.161	663.659	1040.91	1226.71	697.37	847.138	1279.35	1776.94	852.947	2412.96	2706.12	939.413	2363.56	2379.08	1658.05	950.486	1047.45	1740.83	787.542	3113.41	1263	813.13	1641.33	1800.46	1072.72	6290.11	888.619	3188.07	1871.08	1692.7	1327	2563.58	1747.15	77.874
4729	NDUFV2	NM_021074	1662.14	1566.79	983.71	1339.9	1902.55	1778.43	662.092	1067.53	1743.41	2719.19	1148.57	824.626	877.696	1438.37	1393.55	933.565	1102.29	1481.76	1069.16	2292.15	1257.02	1429.74	839.435	2718.4	614.858	2435.41	1424.64	2942.54	1408.58	927.192	6660.98	690.265	1100.14	1412.99	927.264	1120.56	1137.97	808.292	1257.72	897.429	964.768	1146.03	1719.91	1484.41	66.3568
4735	SEPT2	NM_001008491 /// NM_001008492 /// NM_004404 /// NM_006155	4372.33	2098.3	1772.11	1600.67	4612.74	2129.42	1590.86	1860.52	1882.36	1699.07	1779.17	2025	1196.68	1533.12	2488.52	2439.95	1528.63	3802.92	2678.18	3153.76	1923.92	2117.96	3291.91	1607.18	2488.47	2078.16	1864.23	951.986	1812.63	1675.33	1475.07	4245.82	2510.11	1719.22	2646.46	1956.2	2970.45	1828.36	3002.2	2073.31	3492.18	3168.13	2476.34	2316.74	36.7832
4736	RPL10A	NM_007104	6774.76	5852.41	6394.17	15974.4	11388.3	8645.98	5280.52	9556.29	12120.1	14019.1	7531.95	1552.28	1839.73	3067.8	2805.47	1985.61	2305.58	3068.45	9425.13	12371.3	12358.1	7187.58	8522.2	13067.3	8675.18	3171.35	3416.89	3475.85	7133.96	7819.08	6917.07	4281.55	4867.7	6796.47	8456.66	1680.96	6365.94	3355.7	7384.37	9803.09	8342.92	7551.13	16777.3	7194.6	54.5819
4738	NEDD8	NM_006156	1866.9	1084.43	527.239	255.254	1483.55	1283.23	1190.41	1208.34	1484.94	1939.87	945.852	1094.78	907.416	1745.03	1823.81	934.113	1290.22	1781.75	916.648	1095.28	1534.06	1279.55	1264.76	1676.71	328.913	1144.79	900.932	515.962	1281.22	997.246	1421.98	156.124	904.218	1101.02	1405.97	576.465	3365	665.628	1404.26	1666.85	1184.43	1447.83	1802.6	1229.9	45.0224
4779	NFE2L1	NM_003204	1863.89	2125.81	762.032	490.469	523.252	586.424	346.372	422.138	395.187	303.305	476.944	1273.84	963.216	1720.63	1755.68	1817.74	1442.34	1967.63	1023.28	1758.64	948.76	1404.1	1408.4	1138.84	1414.94	3673.42	2187.64	948.323	1168.63	1028.71	5763.52	544.885	1431.52	1359.32	1065.74	924.102	1149.69	836.096	756.218	190.795	1089.69	1563.02	983.198	1279.03	74.5985
4780	NFE2L2	NM_001145412 /// NM_001145413 /// NM_006164	2282.73	932.771	1802.37	634.965	1249.4	1620.17	2667.43	1224.78	1364.15	2056.68	1061.23	846.156	635.146	574.341	1428.59	1433.31	622.539	2227.02	1177.54	2084.79	2895.18	2103.8	3009.11	3337.67	1847.57	1273.89	1394.58	1014.97	1969.79	798.417	833.094	1060.31	1390.59	1047.92	3235.78	1175.19	519.486	1273.59	1523.07	2221.63	1546.12	1713.41	4082.37	1609.15	51.1062
4783	NFIL3	NM_005384	1094.13	2051.2	809.129	248.963	1308.83	2164.91	6946.88	962.189	428.811	788.729	1108.74	268.336	371.016	400.974	347.819	322.583	376.937	293.326	948.402	3225.11	622.393	561.291	866.427	600.662	1497.56	853.164	675.004	1185.97	712.068	344.172	487.734	909.651	1143.83	1168.81	541.967	594.871	781.616	370.575	387.498	2147.08	833.101	1043.27	383.903	1004.18	110.384
4792	NFKBIA	NM_020529	2547.93	4075.74	5511.81	3912.4	4386.39	13538.4	12770.7	4888.23	8981.7	11879.5	6808.83	775.498	844.47	850.623	1056.67	983.655	555.024	1485.63	3485.97	13264.9	6841.68	4101.89	1616.05	4077.39	2306.08	1222.62	2038.6	2053.82	2523.94	3252.28	799.028	1825.67	2274.29	1700.59	2579.15	653.877	1507.69	1269.26	4091.62	6420.21	7729.6	2261.27	3294.77	3931.29	90.217
4809	NHP2L1	NM_001003796 /// NM_005008	862.718	1819.06	673.526	1300.46	1891.84	1252.46	697.702	1271.38	1660.6	4090.63	1132.81	966.569	1102.73	1612.75	1284.87	1197.23	1157.64	1220.26	1210.37	1925.87	1390.83	817.814	1058.54	1585.66	1016.86	1434.71	846.531	744.416	1148.36	994.007	1479.66	816.425	657.641	861.431	945.873	1386.06	1974.49	513.25	1247.44	1152	918.948	1085.32	1146.17	1245.44	45.5205
4830	NME1	NM_000269 /// NM_198175	1051.21	1574.92	700.284	1290.67	1802.22	519.225	220.623	596.994	810.511	956.265	1894.05	1209.48	1160.47	2074.49	2022.8	1408.44	1952.26	1508.59	1156.58	1346.53	1929.56	990.408	621.113	1831.98	1227.72	651.381	891.757	1162.86	949.033	840.418	729.508	791.476	579.486	1008.96	1096.22	646.814	4049.48	791.8	1491.81	516.945	817.95	1586.98	1219.88	1201.86	53.8539
4841	NONO	NM_001145408 /// NM_001145409 /// NM_001145410 /// NM_007363	1327.97	1650.66	903.247	1592.85	3174.13	2066.38	2205.54	2205.98	2737.72	3185.9	1660.81	601.946	1066.87	957.782	873.943	805.196	701.617	852.344	1290.04	3756.54	1333.69	876.997	2211.19	2185.58	450.712	1084.67	1001.24	1166.09	942.231	1938.28	514.385	921.612	1055.92	711.18	1539.22	729.152	1723.8	613.511	2388.13	1824.93	1323.34	2192.3	1629.55	1487.79	52.6728
4848	CNOT2	NM_014515	712.454	371.095	458.208	1308.98	1765.94	859.47	780.754	1242.8	1513.96	2694.21	666.831	477.131	812.013	596.021	722.901	400.152	419.864	628.191	1238.14	1381.16	778.966	943.744	656.001	480.337	1252.88	449.378	393.119	287.288	668.433	651.653	569.027	897.384	594.505	550.972	1105.1	457.016	1368.03	452.652	1023.59	1036.65	1125.31	731.543	892.559	846.893	53.8121
4853	NOTCH2	NM_024408	1437.91	269.315	360.2	490.109	2276.35	1704.23	2511.34	1159.63	366.876	351.039	357.086	224.707	128.762	168.628	313.303	263.012	174.1	265.582	763.857	1607.2	690.493	294.291	1256.81	729.539	528.058	331.215	235.194	294.689	336.25	590.618	182.478	367.626	736.275	380.854	1204.65	576.156	644.097	301.809	715.189	750.634	894.373	624.517	973.771	670.531	82.5096
4869	NPM1	NM_001037738 /// NM_002520 /// NM_199185	3771.29	3188.3	2773.25	7055.77	7752.07	3438.36	2141.37	4515.44	6806.04	9205.27	4611.66	1366.75	1754.32	2015.62	2243.71	1716.5	1274.5	2792.11	5788.27	10018.2	4968.51	4766.29	6267.39	3521.7	5553.71	2012.06	2111.38	1900.49	3152.87	3508.4	1585.29	3132.34	2616.08	2733.52	3783.56	2515.51	4946.4	2119.22	5019.48	4290.53	5359.18	4560.47	6140.57	3971.95	52.7455
4898	NRD1	NM_001101662 /// NM_002525	1156.64	926.802	642.113	1049.89	2757.36	1132.82	2647.07	1299.06	1125.18	779.709	1233.56	920.718	748.407	1052.22	1057.66	853.724	885.921	1044.1	856.893	1102.41	1204.92	956.838	854.28	826.849	802.012	1049.33	604.213	542.381	1107.43	880.827	2650.76	879.64	1002.87	948.273	1124.47	3480.54	758.2	549.429	1445.97	2046.53	1001.92	898.492	1098	1162.47	53.4421
4904	YBX1	NM_004559	6107.74	4141.58	2615.35	6789.08	14033.8	6498.52	5546.11	5750.86	5003.92	5362.83	6094.5	1242.2	1315.81	2107.64	1511.88	1489.94	1853.21	2159.91	2370.41	8663.55	5437.21	4970.24	3240.58	3878.39	2412.17	6149.74	2687.63	2875.04	3148.37	3630.56	9706.45	1384.3	2629.9	3023.37	4136.9	10833.8	4562.83	2673.16	5979.25	21297.3	6069.25	4251.85	6536.38	4934.27	75.2509
4942	OAT	NM_000274	2275.81	2910.92	717.178	909.956	3212.26	1536.05	1125.47	1171.1	1148.22	1460.72	1270.24	1781.73	1193.13	3627.42	4533.9	2446.24	2673.66	4595.76	3397.29	4193.09	2172.87	2168.08	2647.79	2869.79	3855.27	1025.22	1749.79	2387.47	1986.69	577.48	1131.41	1371.09	1045.11	942.333	3210.09	1276.68	1732.57	633.675	1712.31	4434.26	1642.89	1917.27	4623.32	2169.62	54.6759
4946	OAZ1	NM_004152	8102.63	7470.41	4057.36	7195.77	14297.8	12501.2	19309.4	13236.7	7369.7	6122.67	7422.05	3562.2	3399.22	5896.71	6612.98	3704.7	4450.13	6577.45	4474.72	8883.4	5909.85	8141.99	6790.01	7525.23	5002.15	5327.57	4491.68	5533.09	5294.9	5274.18	8027.51	4317.49	6283.04	3702.31	6117.12	3479.12	5034.66	3831.21	7775.93	42659.7	9862.65	5276.72	7836.02	7631.19	82.7881
4976	OPA1	NM_015560 /// NM_130831 /// NM_130832 /// NM_130833 /// NM_130834 /// NM_130835 /// NM_130836 /// NM_130837	339.413	204.034	205.463	263.596	513.653	187.613	110.985	240.504	261.641	239.434	189.032	925.575	510.597	1018.31	1000.82	720.875	722.331	750.287	319.853	344.822	189.767	319.806	480.276	198.75	352.949	747.818	253.434	161.637	196.207	194.647	437.52	289.433	189.385	227.588	401.674	125.802	215.947	188.063	263.173	1591.16	244.897	262.878	216.418	391.118	77.5201
4983	OPHN1	NM_002547	1871.52	903.911	10439.9	2395.1	662.899	2103.61	3713.99	3114.81	2108.7	2053.39	2426.97	1833.72	1703.27	2113.9	1860.71	1634.11	2625.05	2939.51	2120.77	1203.47	3535.63	5475.24	2351.45	1775.16	1176.99	2859.39	3307.94	1355.58	2490.97	1186.68	5274.72	1044.46	3180.57	3147.88	3608.93	3471.87	1229.24	2344.07	1387.24	1382.85	5731.05	1813.46	1579.13	2570.69	65.9557
5007	OSBP	NM_002556	498.049	450.267	240.487	234.238	457.585	191.779	509.721	388.991	339.264	542.622	318.615	182.582	313.163	305.689	269.371	246.804	217.669	309.031	367.504	870.617	244.747	326.723	794.275	249.261	130.718	357.344	443.998	387.989	221.131	280.07	345.582	226.836	675.803	228.202	553.877	246.25	291.998	233.275	381.18	306.804	178.822	426.352	513.557	355.787	44.7796
5033	P4HA1	NM_000917 /// NM_001017962 /// NM_001142595 /// NM_001142596	451.409	500.915	306.935	466.938	1603.83	470.867	402.008	417.951	497.265	462.365	540.33	312.879	186.984	290.016	454.795	430.018	200.212	336.405	491.618	4617.88	490.136	397.083	743.988	264.253	304.954	749.478	456.961	866.027	628.176	405.986	1025.72	601.727	655.337	459.175	604.332	321.405	867.286	153.647	664.452	487.226	1149.69	1025.57	308.177	629.591	108.434
5034	P4HB	NM_000918	2621.65	4478.12	2103.62	568.687	2669.74	1970.64	1615.98	1513.01	1695.31	1795.15	3443.57	567.906	732.368	685.68	745.199	1102.73	499.618	908.699	2475.21	5224.66	4969.11	3036	2805.78	8450.35	763.366	2169.15	2300.92	7638.68	3025.62	1988.08	1365.83	4186.74	5997.25	4457.29	2857.39	771.235	3189.39	2396.83	2975.97	1054.65	4197.03	4143.27	4106.22	2703.81	68.846
5036	PA2G4	NM_006191	480.487	336.648	305.743	223.014	370.853	363.274	242.39	453.19	506.121	864.508	551.18	383.615	424.108	373.3	315.1	326.366	350.601	380.593	392.426	526.286	736.705	451.588	388.326	671.168	635.025	362.111	354.369	256.214	412.107	461.773	341.073	154.578	476.031	466.422	561.585	492.848	349.733	371.818	527.427	1144.33	566.105	469.334	627.532	452.279	38.6803
5037	PEBP1	NM_002567	3454.72	14142.6	1586.75	1310.86	2159.72	471.132	384.062	992.551	1997.23	1845.59	1554.65	4991.03	4982.62	6412.34	6256.86	4657.25	5499.96	7111.19	2986.04	1265.98	2625.34	2431.73	2744.81	3186.44	1665.12	3378.8	6815.52	7637.91	2420.55	1626.83	3502.18	1483.3	1618.7	2829.13	2441.73	2211.56	2294.94	5357.82	1630.73	768.159	2432.38	2309.14	2932.69	3265.32	77.2965
5042	PABPC3	NM_030979	6046.8	4248.19	4427.61	12836.9	18378.1	15164.7	5870.24	10152.3	10713.2	17029.2	6678.72	1180.95	1032.39	1263.79	1847.05	1279.95	1184.99	2666.95	6847.77	9725.06	8716.16	5597.19	5212.73	6671.02	8614.18	1442.31	2997.85	3089.31	3741.85	6407.39	1284.97	3309.92	3027.98	4167.29	6058	6590.16	4130.35	2510.11	9250.34	21537.1	8801.62	4548.89	11027	6449.04	75.851
5048	PAFAH1B1	NM_000430	595.406	424.829	176.925	298.384	597.296	346.109	1100.61	529.138	492.192	557.501	210.116	806.571	1012.76	1555.48	1172.89	990.042	1006.36	1091.96	413.871	745.049	485.292	493.301	655.45	371.184	251.027	616.014	252.7	141.14	282.657	363.311	492.255	194.534	513.947	261.739	753.767	941.138	493.572	125.65	463.575	309.168	404.521	509.509	682.331	562.355	56.9968
5052	PRDX1	NM_002574 /// NM_181696 /// NM_181697	3252.87	4148.02	3562.1	3004.04	3895.02	3968.79	678.934	2089.38	2292.59	2668.28	2999.74	3438.26	2282.15	3527.24	4110.38	4665.31	3376.06	6841.91	3370.83	7108.86	10403.1	4793.02	4183.83	12048.5	2615.31	4529.37	4748.63	5101.11	7122.76	2926.12	4297.47	2658.46	5330.16	3472.99	3960.2	1878.9	6248.06	5974.73	4389.73	4572.52	2511.4	3713.12	4119.78	4253.02	49.1281
5093	PCBP1	NM_006196	2942.02	4006.14	2264.85	3461.37	4632.77	5670.3	11249	4254.65	4631.52	4181.01	3935.98	1297.86	1803.8	1800.21	1212.39	1639.33	1687.25	1122.42	1483.02	4077.95	2736.3	1852.44	1230.84	5008.51	1519.47	2340.16	2131.59	3467.94	2308.48	3516.42	4808.16	1715.66	3740.45	2364.72	2093.16	1970.22	3937.48	2935.3	3537.08	7566.92	3840.95	2656.55	2253.99	3183.41	59.019
5094	PCBP2	NM_001098620 /// NM_001128911 /// NM_001128912 /// NM_001128913 /// NM_001128914 /// NM_005016 /// NM_031989	1888.72	1318.18	289.352	1737.97	2372.49	2622.46	4467.51	2225.56	2663.07	3336.39	1252.52	309.069	583.69	471.479	624.015	452.093	358.547	713.57	1173.82	2571.16	625.43	1277.15	1781.2	1838.3	328.161	782.009	1644.34	1346.88	786.41	1419.71	529.988	391.529	535.241	352.56	1438.95	838.553	1219.04	667.389	1336.56	5120.53	993.533	1456.71	1876.64	1395.78	76.8765
5108	PCM1	NM_006197	501.125	172.769	179.074	423.349	573.234	182.477	362.696	344.945	465.599	694.706	233.342	280.359	242.58	312.182	348.338	265.959	175.663	345.843	435.551	402.605	226.262	189.05	616.948	126.92	213.871	287.78	158.789	107.141	445.512	205.215	438.839	176.301	228.11	148.205	335.056	1135.69	235.828	110.629	396.802	374.239	264.711	414.403	330.581	328.123	56.8974
5110	PCMT1	NM_005389	1112.09	461.926	282.938	630.909	1785.77	1505.3	817.342	1042.37	833.745	630.237	757.854	1326.88	1089.4	2686.39	2454.62	1408.26	1872.1	1880.24	819.849	944.456	773.901	814.488	869.68	907.568	850.929	1216.55	460.177	699.393	595.954	484.498	1748.3	752.824	591.888	536.492	1073.6	1137.05	1591.14	404.574	821.101	1134.96	694.847	767.151	810.032	1025.11	51.7586
5111	PCNA	NM_002592 /// NM_182649	421.157	485.047	332.934	1058.19	822.966	442.633	259.425	539.998	1152.86	662.945	1118.21	218.841	259.52	308.941	479.839	309.787	215.512	446.94	491.547	608.919	812.97	905.039	399.785	658.894	1186.99	281.341	320.452	473.03	554.389	470.705	283.393	450.009	696.811	300.635	772.325	950.238	1748.97	184.728	1042.07	655.125	439.332	773.367	1066.85	606.132	55.8018
5143	PDE4C	NM_000923 /// NM_001098818 /// NM_001098819	263.978	228.413	254.024	728.649	438.594	344.309	379.332	424.744	489.333	572.547	309.123	255.974	413.7	348.241	347.721	238.509	285.703	295.963	655.489	153.037	372.571	690.234	529.871	103.793	201.783	197.661	354.342	245.021	473.254	273.001	339.855	275.232	236.845	340.949	334.629	387.765	386.251	260.643	367.254	349.13	1188.93	459.346	343.02	375.32	49.1441
5160	PDHA1	NM_000284	1180.49	696.36	487.457	530.919	935.855	578.921	335.54	461.272	581.006	568.729	669.242	772.518	714.477	940.036	821.379	586.456	778.21	579.333	623.682	593.653	798.417	801.963	563.882	869.696	589.114	2459.46	1167.33	888.736	522.204	457.836	1970.62	619.449	707.068	584.358	567.247	258.824	845.269	610.975	747.245	542.415	523.858	556.608	926.44	744.525	51.462
5162	PDHB	NM_000925	1329.79	1284.17	229.696	773.137	2559.05	1303.81	605.001	677.325	946.596	820.769	466.129	706.08	449.256	1440.38	1553.28	808.295	919.369	1270.05	693.21	814.266	1175.94	1133.08	1067.38	1564.2	528.489	2374.66	1171.09	1086.87	738.122	505.18	3129.98	545.266	774.826	508.231	1088.16	741.821	1483.35	293.577	1367.2	591.081	1389.09	1012.32	1675.73	1060.36	55.4174
5187	PER1	NM_002616	502.66	650.269	356.207	433.62	963.317	672.281	1086.26	759.503	1204.48	1350.16	540.978	629.639	718.029	633.519	547.443	561.184	582.448	406.995	416.695	428.437	347.087	194.173	257.987	454.651	219.778	588.707	428.387	409.146	350.502	698.823	771.597	260.095	368.594	291.347	394.511	333.427	359.449	359.3	598.697	699.504	549.649	370.275	365.811	537.573	46.9493
5202	PFDN2	NM_012394	1028.75	1113.11	405.461	989.378	2498.94	851.686	558.551	554.043	914.619	1216.07	613.857	898.404	787.435	1465.21	1224.61	1099	1120.71	1457.88	567.209	1456.51	901.324	503.341	648.753	682.504	736.424	665.63	462.089	730.628	708.036	454.493	1136.81	476.509	556.2	750.53	500.194	753.882	2458.96	265.595	962.901	804.373	662.832	770.834	559.913	883.121	52.2248
5204	PFDN5	NM_002624 /// NM_145897	4249.25	2960.53	2637.02	3780.37	7769.14	9059.01	5284.25	5654.58	7191.37	13987.2	3427.2	2826.39	2321.81	3246.7	3281.03	2814.89	2466.68	4190.43	3543	4541.02	5337.6	3142.29	4451.05	4763.3	3167.46	2650.35	3076.74	2538.42	4929.17	4700.63	4197.99	1994.77	2531.08	3462.07	3364.37	3380.8	4104.5	2611.72	3638.22	4696.89	4269.71	4169.13	4211.45	4200.5	50.0317
5205	ATP8B1	NM_005603	570.243	361.32	237.293	1021.42	1532.24	998.041	231.054	735.845	1084.76	1490.51	414.518	463.293	669.416	555.824	613.202	442.61	440.015	620.952	1409.48	419.289	553.422	1191.93	791.395	252.023	242.688	193.043	594.361	343.709	970.725	291.684	548.941	522.522	426.43	532.242	611.625	342.521	456.226	595.506	950.671	550.584	1236.55	951.989	932.472	660.339	53.3704
5213	PFKM	NM_000289	622.266	1963.51	1002.57	764.307	175.14	305.065	137.494	335.617	407.261	244.75	681.936	2397.83	2564.66	2909.13	2741.15	2273.65	2727.32	2222.94	877.171	536.277	830.18	448.874	673.535	1334.57	1179.33	5953.4	1393.67	360.651	739.781	572.126	15056.9	807.689	460.576	945.624	578.541	1668.31	1007.57	1005.3	503.224	399.86	712.864	921.688	672.514	1491.09	159.253
5216	PFN1	NM_005022	2614.96	2889.96	1915.43	2163.88	2418.52	7133.17	12303.3	7053.54	8386.31	7166.88	3721.01	902.547	839.73	983.745	1286.25	1698.4	917.761	1723.35	1286.48	3987.93	2534.93	6837.05	3020.97	6076.77	493.941	1981.59	2399.61	4124.68	3031.91	5034.65	1409.66	296.641	3281.49	2195.41	2352.92	990.86	3537	2026.79	4160.55	11323.1	8122.4	4953.14	3451.23	3605.36	78.4319
5223	PGAM1	NM_002629	3282.34	6096.17	2509.14	4478.24	8007.88	6659.26	5194.67	3564.85	3182.3	2343.69	2534.13	3194.2	3168.98	6000.7	5477.17	3593.99	4631.77	4839.76	2513.87	8150.25	8228.81	4626.69	2071.6	9680.52	4121.05	3276.31	2704.25	2690.68	2467.62	1848.86	928.69	3016.01	2951.62	2369.99	3444.01	1797.84	5438.78	1635.84	4508.89	4110.91	5047.9	3074.85	4946.52	4056.08	48.275
5228	PGF	NM_002632	326.272	262.586	241.536	762.799	719.46	327.55	227.638	437.213	408.941	501.646	286.242	325.582	464.514	291.82	338.482	232.837	291.801	567.753	762.946	340.874	312.437	778.503	536.56	155.964	211.697	175.928	301.548	175.18	388.735	275.556	341.046	252.956	2264.78	395.383	587.317	259.986	400.455	633.312	444.466	408.412	534.057	443.093	750.439	445.263	74.5667
5230	PGK1	NM_000291	2085.86	3275.2	1199.47	2267.33	8210.23	4630.19	4576.83	3129.84	2819.89	5241.7	2301.71	1157.27	1430.43	2412.67	1823.24	1399.88	1833.85	1919.73	1082.19	4370.64	3150.47	2630.23	1257.93	4859.24	804.971	2520.47	2139.29	1363.83	1738.56	1524.88	3904.28	1770.23	1848.74	1213.53	2033.53	343.567	4091.59	1011.12	3886.39	4007.33	2449.78	1894.53	2331.72	2556.85	58.8123
5236	PGM1	NM_002633	5132.35	2718.79	1089.28	904.425	1718.76	1083.37	1190.39	769.808	802.82	585.709	1024.91	1205.25	1026.78	1025.31	1138.59	1187.25	1009.1	1008.59	1706.54	4250.53	1173.04	2218.2	776.095	2501.19	1294.51	3724.73	1738.62	6209.26	1392.2	739.035	15785.4	2262.77	2257.29	1672.8	1314.31	509.288	2181.03	1212.36	1033.4	977.411	1369.96	912.9	1417.3	1982.6	124.06
5245	PHB	NM_002634	543.04	469.549	254.753	323.168	1538.49	236.047	179.827	317.056	405.187	369.465	336.658	136.595	126.374	286.48	296.255	258.298	184.39	356.406	524.039	478.441	494.922	596.725	489.436	613.939	172.751	497.187	847.985	640.829	387.306	252.366	531.754	233.787	272.586	556.156	439.461	179.028	326.326	258.74	687.185	250.906	367.917	551.99	636.068	416.415	58.2501
5250	SLC25A3	NM_002635 /// NM_005888 /// NM_213611	7224.87	9646.53	4759.11	5913.72	15037.3	7553.71	5743.33	5764.04	6607.21	7035.47	5518.32	3310.1	3306.2	5017.7	4469.87	3619.81	4376.27	4840.93	6055.95	9890.59	6649.34	9617.93	5568.98	10449.6	5235.73	9655.61	5867.74	5724.67	5029.5	4040.17	14418.8	3917.21	4996.81	4466.74	5634.14	2224.25	7889.31	4168.54	7061.63	6238.59	6372.42	5138.61	7758.87	6367.82	41.7149
5252	PHF1	NM_002636 /// NM_024165 /// NR_027692	282.001	565.465	432.142	709.896	191.694	367.586	992.973	571.657	1659.25	1482.7	459.616	423.498	431.021	503.944	425.914	506.511	405.486	465.273	713.489	604.531	304.334	228.401	466.668	243.599	817.731	455.928	406.747	214.338	394.936	836.394	347.485	616.282	297.429	515.175	212.897	873.686	357.414	438.319	284.225	373.322	456.051	509.508	179.594	512.212	59.0066
5257	PHKB	NM_000293 /// NM_001031835	572.324	502.518	289.827	572.318	866.105	502.827	339.299	407.642	369.862	277.978	382.249	349.474	280.274	399.456	418.766	394.467	305.626	459.806	594.16	123.778	486.754	511.36	386.75	440.873	430.712	447.42	385.311	267.088	404.193	372.23	1255.95	431.004	456.474	407.607	416.978	341.444	345.584	443.54	465.824	421.341	480.295	492.122	403.554	439.608	38.6868
5281	PIGF	NM_002643 /// NM_173074	428.182	429.81	438.791	323.212	457.91	457.501	385.528	480.285	324.299	184.593	373.305	368.663	307.175	351.94	437.51	425.202	279.569	424.783	488.281	350.372	579.178	431.127	433.893	430.888	677.129	230.555	311.911	277.943	505.515	303.895	398.314	541.537	382.721	334.252	401.424	611.684	757.254	271.55	418.805	208.886	231.094	442.423	430.976	403.02	29.1497
5286	PIK3C2A	NM_002645	1116.17	459.427	413.211	484.631	660.028	240.897	373.53	378.034	608.37	785.861	365.27	1093.04	915.298	588.462	997.423	1114.3	534.716	1240.47	905.646	1068.04	489.519	833.85	1266.87	317.37	747.785	597.444	811.821	408.613	442.597	454.724	257.694	738.594	829.573	488.944	978.155	753.583	981.913	538.95	566.183	497.536	867.237	859.468	929.816	697.699	39.9087
5292	PIM1	NM_002648	475.832	355.301	757.343	369.467	351.843	1087.6	1599.73	1608.56	2373.82	1582.07	1065.79	166.132	238.237	163.471	155.921	205.225	180.257	167.17	288.946	918.016	2843.38	512.502	251.244	2278	336.055	247.099	275.075	636.367	401.049	592.074	121.729	539.58	754.386	464.361	659.198	170.464	575.771	168.489	639.589	4766.14	1068.48	497.412	376.541	774.086	115.416
5295	PIK3R1	NM_181504 /// NM_181523 /// NM_181524	1319.78	375.488	276.072	303.484	565.37	397.973	965.413	912.352	2297.97	3264.15	614.804	886.378	740.171	1510.66	1312.53	735.989	1356.51	1121.28	1478.59	204.533	604.751	334.943	2202.66	450.158	1183.32	645.308	354.016	1017.91	245.598	501.472	490.106	196.879	401.358	405.484	1074.36	147.156	385.193	265.432	386.743	449.509	510.053	1256.13	815.811	813.113	78.3802
5303	PIN4	NM_006223	389.488	374.549	283.153	415.497	655.374	444.813	143.925	259.262	378.658	316.987	288.441	295.296	295.893	346.629	337.477	245.213	300.519	330.779	716.134	152.828	541.146	258.899	415.133	311.597	579.667	265.46	260.063	324.048	429.75	274.771	382.489	703.354	280.032	356.457	426.186	130.353	1543.21	274.425	459.846	203.069	220.327	428.262	332.301	380.739	59.0678
5336	PLCG2	NM_002661	280.237	473.024	444.377	3157.45	1651.99	1401.59	2564.55	1098.88	147.482	364.806	1110.36	233.193	134.001	104.849	159.07	186.309	158.092	172.664	343.747	298.999	284.094	263.826	395.469	265.852	329.555	185.928	738.188	563.458	459.698	965.599	220.969	460.758	292.578	207.233	280.6	168.792	324.187	424.344	1838.76	1108.43	192.936	318.392	255.694	582.116	113.37
5383	PMS2L5	NM_174930 /// NR_027775 /// NR_027776 /// NR_027777	497.664	380.223	606.777	975.823	613.947	524.334	476.898	571.419	832.711	848.709	541.551	483.339	533.008	570.195	392.644	556.763	568.867	492.337	550.929	300.64	570.779	373.606	439.814	748.105	723.035	483.906	411.38	517.593	603.089	609.794	496.144	313.492	342.325	504.675	368.054	764.303	693.011	490.864	729.961	501.698	431.967	491.542	389.918	542.275	27.2591
5411	PNN	NM_002687	555.144	499.654	535.019	1301.47	2121.55	679.907	910.671	885.998	1578.6	1104.81	858.642	460.736	939.895	720.405	706.393	531.459	443.517	713.734	1451.03	1429.55	817.669	459.394	1394.18	321.142	1194.02	330.901	412.579	248.949	420.5	620.664	251.713	467.476	493.069	628.885	790.637	436.91	1015.55	188.486	1177.26	738.085	809.82	1085.37	907.069	782.291	52.7357
5412	UBL3	NM_007106	1144.06	485.537	421.864	707.937	1484.04	1078.35	1693.5	852.929	1333.94	1603.28	383.752	1821	1037.45	1690.22	2495.43	1791.77	1251.37	2714.24	696.396	2097.7	576.291	1083.76	984.084	854.554	432.402	546.417	560.945	329.123	793.227	405.11	759.841	734.171	438.131	328.566	1258.59	443.751	536.655	408.903	591.981	686.637	496.118	726.587	1105.68	973.635	60.9741
5431	POLR2B	NM_000938	1191.95	983.501	990.836	2569.2	3251.89	1565.8	2197.65	1640.55	2169.57	2156.65	1085.31	952.577	1105.75	1415.76	1404.92	903.546	1091.79	1074.3	1761.93	1703.29	1091.79	1317.07	1478.09	644.153	1792.07	1044.41	630.344	478.718	1171.69	1078.85	1295.78	903.097	1008.82	1023.18	1711.79	1055.63	1866.23	647.621	2332.91	1105.31	920.809	1184.74	1279.86	1355.34	41.6648
5432	POLR2C	NM_032940	646.198	824.857	587.376	564.388	815.908	544.037	903.016	601.285	746.552	613.857	631.12	779.258	715.208	704.944	601.83	683.234	718.57	653.551	527.58	828.932	600.569	591.233	708.138	613.858	516.553	711.732	758.185	674.76	640.544	537.744	912.331	757.417	555.755	592.305	523.166	550.58	795.549	636.612	581.458	510.017	553.121	629.414	481.511	654.052	16.6149
5436	POLR2G	NM_002696	1284.31	1815.98	1170.05	1542.06	3090.97	2385.01	1578.37	1970.06	2055.24	3716.78	876.138	1035.95	368.818	1122.18	1239.66	1236.77	986.25	1090.7	1423.91	1495.76	1811.42	686.254	961.177	2097.27	1781.22	919.926	804.444	748.675	1334.13	1354.74	807.855	482.13	1243.03	1315.77	1127.87	734.83	3705.66	1054.64	2038.22	1591.19	1657.65	1553.78	1134.88	1451.9	50.19
5437	POLR2H	NM_006232	479.14	1488.4	683.012	1221.11	1062.91	837.11	252.862	514.554	986.541	1009.25	766.309	486.125	697.753	673.123	508.5	444.201	498.465	382.133	1022.7	1138.17	1268.04	1191.42	431.218	1027.02	1340	427.659	768.223	513.171	1026.35	680.933	473.284	1164.06	500.931	839.488	562.871	538.623	1870.84	664.863	940.674	403.512	638.744	786.004	562.46	785.413	44.2542
5438	POLR2I	NM_006233	753.74	1103.12	311.942	506.186	796.58	543.384	406.881	424.733	796.289	2580.47	541.73	1444.03	1349.09	1571.47	1810.85	1564.54	1261.8	2129.97	967.573	622.049	1089.34	879.937	992.667	2495.21	594.678	1729.55	774.209	1223	1954.26	470.645	3409.86	319.386	341.196	821.079	665.4	2709.48	818.101	956.574	659.164	516.267	1012.07	884.195	1045.13	1112.74	64.2282
5440	POLR2K	NM_005034	802.701	311.917	268.45	334.114	518.207	370.292	269.994	324.775	601.804	1335.23	387.253	358.343	342.494	606.598	756.435	427.246	498.022	745.694	406.34	579.049	427.998	487.295	784.859	364.629	451.564	340.366	407.202	326.44	385.829	284.984	392.119	385.754	325.064	296.476	617.832	274.062	1002.38	263.099	427.991	279.347	534.785	504.361	672.293	476.318	45.7417
5441	POLR2L	NM_021128	1803.41	666.085	383.234	178.856	509.449	546.263	231.609	368.998	413.711	775.291	383.573	253.108	218.895	314.056	429.555	319.22	277.856	435.009	364.924	585.053	784.786	630.001	492.298	1074.97	352.116	852.753	638.49	564.888	613.858	425.425	916.045	257.56	369.814	498.094	628.653	321.6	643.567	562.685	474.123	610.239	540.649	696.553	997.564	544.3	52.866
5464	PPA1	NM_021129	5842.99	4265.35	2159.43	3412.98	8469.62	2876.14	583.604	1870.34	3278.62	2174.83	2444.72	2959.9	3355.4	3285.64	3437.95	3345.41	3296.05	4803.71	4515.95	3701.84	5771.42	3840.47	2654.93	3899.67	2175.9	1641.86	1727.95	1728.91	2503.56	1793.84	2426.42	3562.72	1969.51	1453.84	2982.13	1671.81	4542.38	2006.77	5719	1690.65	1330.63	3086.08	4626.64	3136.92	47.9618
5478	PPIA	NM_021130	8931.88	12558.6	9418.08	15975.7	18434.7	12530.8	8325.11	11316	12607.2	15142.2	10253.5	7251.22	6589.77	12001.3	8892.26	6984.93	8869.44	9328.96	10552.2	11123.1	18549	11081.3	7150.02	14275.5	11147.2	4748.73	6884.62	5642.19	9467.82	8419.71	3181.14	4982.14	6977.13	7584.06	10059.5	3853.94	12332.8	5765.23	11661.3	9310.5	14165.2	9938.04	16271.5	10012.5	36.6211
5479	PPIB	NM_000942	2238.58	2651.6	1007.87	1913.57	6969.24	3135.97	1418.47	1834.21	2607.68	4897.44	2558.64	601.233	467.658	786.478	1392.64	1080.34	693.913	1457.38	1511.7	7408.04	1760.45	2840.2	6132.53	2730.85	539.994	1093.34	1557.55	4326.66	1748.46	1731.65	315.271	1548.5	3570.95	2040.85	2503.26	698.286	1579.08	2512.21	3773.53	1830.61	2681.99	5470.52	2542.85	2375.87	71.2198
5481	PPID	NM_005038	513.043	308.317	371.555	300.85	735.825	521.963	618.395	565.303	556.562	604.188	325.281	309.137	266.867	714.381	629.306	520.324	488.166	529.546	183.583	561.773	388.779	303.671	378.207	382.085	198.13	475.774	274.958	492.964	425.655	435.824	994.233	303.675	425.239	276.056	414.002	570.597	455.278	196.25	549.722	415.484	378.109	435.58	435.735	447.218	35.5348
5495	PPM1B	NM_001033556 /// NM_001033557 /// NM_002706 /// NM_177968 /// NM_177969	825.4	213.106	270.942	811.627	1301.82	598.331	1397.86	886.855	1075.15	849.434	382.56	602.018	928.033	739.641	1084.47	621.608	497.836	923.321	675.21	425.103	330.127	1000.95	819.794	337.567	616.688	400.721	354.097	327.162	384.767	425.951	1244.62	658.042	348.185	504.537	670.843	274.804	937.718	217.863	854.049	761.072	640.601	650.536	784.711	666.412	45.2398
5500	PPP1CB	NM_002709 /// NM_206876	801.367	258.464	346.181	381.73	1727	772.608	833.821	1106.81	1147.33	1590.81	472.274	487.726	330.259	642.045	942.954	521.99	430.066	797.988	849.893	795.381	815.65	1875.09	1755.85	1092.9	792.214	746.56	444.267	139.64	547.389	325.721	1556.92	839.614	721.928	613.735	1062.69	272.95	439.776	278.178	694.39	1647.37	1535.8	922.979	1227.85	827.585	55.5394
5501	PPP1CC	NM_002710	3365.99	2167.75	1605.51	4124.11	6762.19	3386.38	3885.79	3348.27	5212.71	3889.45	2308.84	1178.72	1460.19	1622.73	2432.29	1428.57	1333.29	2237.17	2702.04	3648.31	1807.86	4592.78	3199.82	2335.69	2404.45	2058.95	1359.96	1151.87	1636.39	1367.51	3451.21	3096.23	1221.65	1372.15	3265.54	4506.16	3354.55	1394.56	3073.34	3069.83	1412.29	2064.9	3347.05	2666.16	46.9339
5504	PPP1R2	NM_006241	369.51	195.906	256.825	591.482	1622.03	710.558	1164.91	920.026	1590.55	1381.35	543.11	337.199	264.654	465.469	551.789	366.464	375.555	449.228	320.633	569.03	509.732	459.563	741.449	489.668	213.318	372.727	289.259	170.521	360.503	542.842	1160.63	266.639	358.99	345.79	427.825	1348.96	428.636	277.977	759.346	748.485	421.534	426.002	432.131	572.065	64.9314
5510	PPP1R7	NM_002712	731.1	547.327	318.216	664.276	1892.14	774.411	743.989	673.42	809.006	1218.29	411.118	1437.88	596.316	1214.34	1187.14	578.71	940.178	815.04	502.563	351.426	921.122	832.395	817.559	976.535	389.901	509.981	464.93	396.5	852.074	426.29	545.881	416.864	369.379	875.724	716.692	3175.92	652.825	423.768	905.235	624.929	432.639	575.111	908.589	781.807	62.8667
5515	PPP2CA	NM_002715	1183.35	1404.62	821.264	1086.97	3274.35	2039.46	2494.25	1553.44	2361.11	2636.81	1365.17	1379.35	1353.82	2429.4	2793.98	1506.05	1904.62	2133.82	1064.55	2946.16	1804.97	2001.55	1547.31	1784.67	1291.11	1739.2	1052.75	672	981.573	876.461	1288.18	867.202	1845.77	870.162	1689.15	1038.92	1731.48	776.814	1838.41	2165.52	1029.41	1382.51	1735.79	1621.94	38.8906
5516	PPP2CB	NM_001009552 /// NM_004156	966.809	519.34	333.697	204.125	521.739	395.907	259.281	223.954	248.747	168.712	185.115	962.551	861.32	1267.97	2071.59	1152.42	1044.68	1776.87	566.341	1651.03	613.547	1211.45	1408.57	873.908	552.17	659.007	709.304	534.977	717.805	248.52	618.274	500.813	657.607	489.644	850.694	524.966	592.35	567.389	437.925	192.948	535.221	758.094	881.758	709.747	61.878
5520	PPP2R2A	NM_002717	865.95	747.602	760.023	1144.92	999.854	750.618	2639.52	886.154	1240.22	1813.05	823.453	1083.67	520.422	889.481	844.744	925.494	864.101	1106.41	1012.1	1585.36	1880.06	887.85	845.215	1837.31	938.102	936.723	617.07	574.775	889.092	668.634	1168.13	643.584	1170.58	658.331	974.625	1014.01	946.684	699.599	1079.7	1284.78	783.925	815.708	1098.99	1021.32	39.5356
5528	PPP2R5D	NM_006245 /// NM_180976 /// NM_180977	344.743	292.637	454.118	153.64	300.502	364.008	303.458	388.626	491.569	380.18	432.753	618.198	671.84	453.179	367.706	505.293	585.296	345.007	288.821	318.142	415.315	121.405	194.118	460.556	505.155	495.676	371.76	518.242	476.03	392.002	619.031	374.783	302.424	530.315	283.164	527.584	563.561	427.586	365.075	288.565	264.032	384.704	235.814	399.456	31.3385
5529	PPP2R5E	NM_006246	736.628	468.549	348.269	797.624	1189.34	639.088	567.237	742.649	900.115	1170.3	508.567	430.739	599.773	783.399	764.522	481.272	625.156	617.099	533.859	720.026	669.446	791.641	783.378	588.354	600.791	364.39	358.055	230.702	358.86	393.898	516.946	346.841	616.267	345.85	956.479	428.797	465.829	383.833	691.483	821.842	733.895	676.692	985.456	621.72	35.522
5530	PPP3CA	NM_000944 /// NM_001130691 /// NM_001130692	841.594	615.27	258.078	1153.97	1496.8	1189.61	2518.17	1085.83	540.222	533.889	455.056	4956.78	2741.21	4373.55	6055.3	1446.13	3063.87	782.822	851.096	2427.68	463.96	612.976	1176.27	269.204	1889.12	387.062	239.392	171.779	419.762	412.354	1164.25	260.964	267.773	1461.23	1138.93	220.125	726.363	168.043	710.555	816.62	331.279	429.772	1251.79	1218.06	107.491
5532	PPP3CB	NM_001142353 /// NM_001142354 /// NM_021132	1185.54	663.182	340.984	784.502	1524.02	612.887	580.101	633.095	972.464	450.478	435.193	1269.3	1585.78	2552.52	2635.44	971.399	1697.01	1003.86	748.046	779.498	383.162	757.974	888.527	492.548	672.8	710.024	363.29	152.805	449.68	530.546	1955.32	717.493	521.748	531.447	696.862	446.726	975.052	220.652	897.099	1025.08	943.129	697.155	627.923	862.38	63.2821
5537	PPP6C	NM_001123355 /// NM_001123369 /// NM_002721	1514.4	523.88	295.79	1007.3	2198.06	1789.79	2304.92	1541.43	1562.01	2500.59	932.82	460.192	431.223	568.179	616.627	514.672	389.951	699.453	786.305	1271.48	1070.08	1610.37	1058.64	1631.81	1060.84	732.635	567.427	234.017	602.688	765.487	1076.59	482.349	646.774	295.313	1033.82	1381.72	972.012	180.533	1159.01	2031.54	828.94	674.252	1376.17	1008.89	57.8351
5538	PPT1	NM_000310 /// NM_001142604	1641.89	1110.25	1431.95	1133.48	9850.69	7541.73	7001.97	4091.37	2132.15	2136.28	2284.37	1907.01	1537.64	2347.25	3036.06	1831.95	1942.64	2728.22	2047.26	1270.83	1153.79	1225.58	1677.17	1112.23	2148.19	1045.81	1376.58	780.59	1880.86	1885.83	679.112	1715.68	1389.16	1341.97	1985.67	863.931	1282.18	1176.97	3846.58	3921.69	1076.72	1753.58	2114.74	2242.78	81.9885
5567	PRKACB	NM_002731 /// NM_182948 /// NM_207578	726.083	744.321	618.914	1449.8	1266.2	401.365	1160.67	1928.09	2363.78	1829.82	858.934	3654.56	3036.61	5346.01	4779.72	3500.06	3867.36	3971.24	478.508	519.523	198.938	2071.73	1714.45	452.789	273.688	710.192	518.583	303.657	224.894	989.154	169.835	858.254	264.362	495.815	451.342	165.386	1344.06	306.647	1111.85	1513.02	957.317	664.199	476.384	1366	97.8777
5573	PRKAR1A	NM_002734 /// NM_212471 /// NM_212472	3092.27	1838.45	1022.86	986.952	4316.8	2102.78	6747.66	2216.99	1289.66	929.811	1026.39	1875.69	1787.56	2775.33	2909.81	2531.6	2121.25	3507.74	1370.3	3137.78	1104.86	940.002	3270.62	1314.76	1196.78	3419.24	1736.62	1170.28	1952.86	1311.2	1598.97	1150.11	1554.8	1055.61	1962.14	1660.01	1537.81	1012.42	2035.27	2624.83	1444.07	1818.43	1621.63	2001.88	55.3539
5584	PRKCI	NM_002740	449.045	293.902	414.399	117.896	331.063	367.52	160.521	403.548	516.173	779.763	320.262	717.143	760.006	848.888	817.477	596.689	631.308	372.123	603.233	1178.02	906.554	759.799	1299.22	710.741	1113.34	392.636	400.733	131.849	508.242	279.965	230.345	388.051	402.312	477.774	700.684	578.474	385.422	452.497	427.167	299.055	1013.9	657.903	900.954	560.386	50.2
5586	PKN2	NM_006256	578.855	196.174	237.794	326.752	1122.91	390.788	2029.27	810.515	630.896	743.475	255.719	313.887	362.662	236.018	446.368	289.666	180.487	453.654	577.784	503.923	700.639	695.854	933.242	272.996	488.235	246.918	320.304	155.092	310.992	270.717	117.15	194.608	350.476	244.599	686.627	136.592	312.113	161.783	440.792	764.103	613.356	523.304	742.056	473.724	71.5864
5594	MAPK1	NM_002745 /// NM_138957	313.101	207.78	193.456	248.223	940.641	766.31	3436.05	651.619	368.081	463.943	344.135	947.839	501.579	802.608	957.679	649.537	678.524	452.098	202.61	753.666	473.082	239.373	368.401	857.279	178.961	530.436	263.625	147.484	200.694	268.225	379.991	109.027	291.915	152.901	456.528	440.926	284.294	183.238	466.864	2715.46	287.986	347.638	410.333	556.608	110.584
5597	MAPK6	NM_002748	672.841	706.516	616.047	511.626	996.923	1381.07	336.115	460.162	1217.31	1167.68	624.717	1142.08	1747.43	2227.46	1588.05	1046.51	1225.42	1254.43	813.451	4412.68	3402.09	3364.47	1623.24	1435.5	2942.91	520.181	452.762	484.449	704.592	304.321	1458.89	671.101	962.896	243.185	1419.96	1004.48	1263.77	100.072	720.935	574.51	326.624	1742.68	1795.13	1201.56	76.0616
5604	MAP2K1	NM_002755	786.586	952.999	352.856	974.82	4142.35	2408.67	1673.71	1141.72	1424.73	1306.6	678.086	1879.64	1738.53	2430.44	2238.92	1082.8	1995.59	600.013	626.598	876.014	776.413	456.241	377.657	1428.61	485.531	570.025	501.232	1898.33	608.509	1072.87	927.962	654.084	597.299	568.492	522.03	298.71	1780.65	386.276	2070.54	710.328	673.597	568.814	536.039	1111.21	69.9246
5612	PRKRIR	NM_004705	1092.38	413.084	643.11	1614.85	2494.24	1234.89	1218.12	1180.93	2124.27	2252.98	836.732	525.352	455.761	710.358	713.405	573.626	530.493	592.455	946.989	989.263	543.217	935.225	1258.42	251.01	1071.24	541.308	497.068	343.777	630.019	818.087	829.471	1128.61	821.008	482.231	952.324	618.755	830.896	371.889	1060.81	896.949	1070.4	729.335	869.003	899.868	53.8183
5621	PRNP	NM_000311 /// NM_001080121 /// NM_001080122 /// NM_001080123 /// NM_183079	1427.07	725.568	929.043	564.158	2628.05	1746.71	416.109	933.192	1833.26	2366.9	863.827	2462.69	2760.1	3530.15	4495.49	2501.74	2885.4	3832.26	1287.58	2674.3	1272.31	1272.91	1609.89	900.923	1593.84	1835.39	1207.62	709.883	928.528	844.689	808.111	1400.78	701.777	1355.64	2059.77	1039.74	1025.58	794.802	1117.91	591.673	659.409	1187.77	2341.37	1584.28	59.9858
5631	PRPS1	NM_002764	428.226	374.128	338.978	614.417	766.157	345.133	461.044	579.19	885.651	694.89	769.331	546.445	548.038	520.043	573.534	603.304	495.022	612.33	270.586	776.156	363.351	155.522	317.594	387.306	200.732	395.311	311.562	725.913	575.268	599.329	628.672	331.935	204.201	353.969	257.823	291.973	1068.17	459.351	589.315	414.241	314.014	349.812	226.48	481.964	41.5411
5635	PRPSAP1	NM_002766	881.668	818.241	600.369	461.378	875.756	578.375	463.744	586.663	706.184	533.769	648.841	758.683	818.641	828.676	741.827	917.48	782.146	750.393	915.899	587.918	936.498	657.749	603.145	1210.26	872.829	757.105	672.817	1167.88	880.726	701.555	592.381	1256.34	681.112	584.008	879.072	1093.56	997.959	1013.15	835.711	596.824	422.628	733.104	772.005	771.513	25.4878
5636	PRPSAP2	NM_002767	236.173	422.574	201.228	1499.28	1232.58	481.867	391.587	554.603	873.227	565.603	468.418	298.786	577.378	570.429	594.034	428.922	415.586	551.124	359.336	335.596	478.976	338.759	367.201	364.833	305.862	249.906	304.634	224.174	359.97	447.893	165.27	222.825	229.538	282.815	295.345	550.289	575.194	300.173	754.498	1214.3	340.45	380.41	369.376	469.326	59.4653
5660	PSAP	NM_001042465 /// NM_001042466 /// NM_002778	7136.91	8607.21	3439.7	1519.35	12630.1	18053.8	18492.5	9043.74	1688.71	1701.81	6656.39	5681.96	4691.42	5659.84	5254.78	5707.01	4850.4	6501.36	4577.23	7273.1	2915.98	3797.14	4512.65	4588.69	626.725	5968.22	5181.27	5019.44	5432.91	6167.34	3596.03	2932.9	7654.19	5484.61	4537.6	3043.43	4870.97	4559.43	5643.74	7504.05	3285.8	4612.9	4782.92	5718.29	61.8975
5663	PSEN1	NM_000021 /// NM_007318	394.366	281.87	175.333	217.531	757.719	1041.75	1612.27	595.608	259.721	196.8	269.953	466.431	196.228	408.137	448.754	654.067	330.356	863.763	241.848	735.399	441.966	503.468	421.133	734.384	189.766	227.129	280.309	253.328	285.309	240.574	157.729	196.053	623.657	191.909	478.278	531.557	177.691	234.937	516.681	460.668	254.678	458.935	454.866	429.37	64.9699
5682	PSMA1	NM_001143937 /// NM_002786 /// NM_148976	2597.92	2881.95	1649.09	2958.31	6018.52	4606.05	1749.07	2569.34	2871.84	4394.46	2259.82	1187.58	919.042	1902.29	1821.03	1222.12	1214.8	1619.07	1710.81	3999.18	2358.8	2521.77	2210.33	3032.4	2544.74	2206.41	1190.49	1151.02	2003.73	1622.54	3546.71	1648.62	2213.09	1407.64	2274.22	1288.62	4089.13	839.014	3521.1	2240.58	1828.28	2109.46	2891.36	2346.33	46.505
5683	PSMA2	NM_002787	1454.32	749.583	570.473	1276.53	2392.7	1322	849.698	909.757	1312.74	2013.99	925.701	587.156	531.873	684.148	832.825	619.057	570.27	916.913	878.495	1470.9	1345.29	1179.45	1097.7	1052.71	1089.36	751.261	794.107	1394.12	901.295	598.62	1605.69	736.503	831.945	806.198	1020.76	742.918	1467.3	422.93	1576.88	579.927	1143.16	1017.72	1382.26	1032.73	40.0318
5684	PSMA3	NM_002788 /// NM_152132	1952.47	990.352	637.254	966.389	2632.52	1574.34	1232.94	1054.08	1444.77	3793.51	1311.89	436.882	439.901	764.018	657.177	598.599	390.855	822.143	683.121	2154.23	1724.74	1197.27	1714.84	1309.05	509.968	1075.33	723.928	933.165	1204.07	746.921	1739.72	425.922	1758.2	625.61	1353.05	558.143	1420.85	219.755	1921.88	555.148	1082.1	1548.77	1806.28	1178.89	58.4205
5685	PSMA4	NM_001102667 /// NM_001102668 /// NM_002789	1962.29	1142.45	942.374	1669.67	6206.13	2561.61	1286.49	1757.88	1947.72	2697.9	1288.63	520.41	477.884	1043.99	1173.71	698.448	756.994	1069.71	1257.89	1593.38	1718.26	2067.52	1465.7	1044.27	1734.77	742.084	874.078	767.09	1444.22	944.92	1496.57	1212.19	1279.47	1233.01	2015.48	1713.85	3021.46	628.409	3301.05	934.417	1738.97	1852.61	2515.82	1576.79	61.9493
5687	PSMA6	NM_002791	3798.37	3120.32	1786.68	2771.74	7890.62	6290.58	2709.67	2844.08	2678.63	4977.76	2814.15	1270.35	1089.36	2129.78	2300.9	1179.07	1445.31	2006	2108.78	5290.95	4159.56	4665.05	2832.55	3896.02	2830.5	1597.38	1185.08	1363	3187.9	1166.93	4635.62	1820.94	2777.26	1260.01	3192.8	6153.61	4429.41	479.775	3986	2763.03	1786.98	2670.27	4199.17	2966.09	53.9536
5689	PSMB1	NM_002793	2003.1	1729.26	880.227	1655.29	5871.78	2017.82	1713.11	1404.6	1712.41	3536.84	1207.63	681.094	502.926	834.392	1027.94	683.707	776.117	1131.36	1492.79	2393.55	1556.96	1875.33	1464.1	1704.74	1650.48	984.917	993.069	1535.62	1528.76	911.579	1505.86	1680.68	1644.82	1131.24	1683.99	984.697	2472.44	743.39	2172.12	1817.86	1644.11	1472.9	1666.81	1583.31	55.3659
5690	PSMB2	NM_002794	1411.33	2124.07	1044.62	1263.4	2092.65	1945.92	989.382	1314.83	1209.11	2099.94	1456.42	992.534	694.316	1206.74	1539.71	1231.78	1155.95	1493.39	1045.98	2343.27	1645.04	2172.98	1537.6	1924.81	1504.28	1465.73	1107.25	2306.15	1657.7	1122.4	1804.02	1095.92	1598.62	1185.39	1040.62	1240.69	2470.69	1001.52	1973.92	1255.14	1307.57	1545.28	1800.76	1498.13	29.0043
5691	PSMB3	NM_002795	1521.58	2242.17	963.253	1240.28	4278.84	3750.68	6853.6	2728.16	2082.06	3508.41	1844.58	993.464	892.702	1362.69	1643.65	1051.91	1226.47	1414.1	969.327	1826.57	2311.63	2499.06	2086.97	2651.24	1115.85	1654.41	1761.5	2385.51	1958.88	1391.08	1863.17	948.777	1538.14	1445.68	1549.92	1067.72	1795.25	1205.82	2471.73	3632.35	1633.72	2028.46	2285.71	1992.49	55.3286
5692	PSMB4	NM_002796	2671.44	3116.73	1484.79	3337.81	5793.83	3137.85	2870.85	2890.34	2508.57	2443.83	1838.95	1152.05	1291.06	1722.1	2308.58	1174.17	1613.15	2426.22	2201.87	3057.8	1778.92	3025.84	2066.98	2006.65	2028.78	1578.5	1812.51	2331.03	2047.43	1525.43	2004.12	1748.17	1824.72	1851.55	2383.98	872.734	5168.61	1289.03	3183.23	2672.98	2072.26	2240.9	2695.24	2308.18	40.7147
5693	PSMB5	NM_001130725 /// NM_001144932 /// NM_002797	1238.96	2420.85	881.554	491.951	909.18	502.046	253.83	450.56	568.248	658.671	762.244	1230.5	874.281	1980.35	1621.15	1315.38	1556.73	1428.71	1261.76	2450.95	1810.51	1022.32	1063.55	2236.91	1057.22	1460.43	1201.75	1082.7	1421.31	612.143	2791.56	1358.49	1583.7	1197.77	1080.17	1016.68	4716.3	763.274	1280.51	656.193	1434.62	1396.74	1311.84	1311.97	58.6111
5694	PSMB6	NM_002798	1137.69	1407.52	879.15	1010.19	2622.88	1425.72	596.553	740.609	1133.26	2044.17	725.477	730.049	563.713	1082.01	902.943	685.292	702.843	1014.55	1080.05	957.134	1377.39	1367.2	819.041	2441.96	687.972	1323.02	841.841	1251.03	1151.91	581.311	2697.88	389.165	1321.95	913.163	1200.49	900.228	3530.17	482.331	1383.05	1502.51	1873.8	1186.61	1369.03	1210.11	53.0411
5695	PSMB7	NM_002799	1878.87	2557.05	818.324	1584.62	3120.68	2109.38	1013.61	1497.24	1439.38	2354.55	1446.82	1173.22	935.748	1958.16	1896.22	1164.71	1578.85	1763.34	1454.49	2695.54	2104.42	1686.1	1776.72	2592.88	1373.22	1339.84	1409.75	1705.2	1711.11	833.058	1979.98	1146.6	1344.65	1274.07	2231.01	2448.01	3756.44	931.304	1739.45	2314.67	1224.24	1618.91	2667.97	1759.31	36.088
5700	PSMC1	NM_002802	2437.87	2302.11	1459.74	2364.91	4012.51	3068.82	1573.98	1627.67	1936.62	3151.58	1918.92	1408.65	1260.56	2270.46	1591.08	1407.82	1743.49	1602.08	2019.22	2703.04	3018.66	1792.2	1526.97	2298.27	2785.75	2003.71	1169.77	1345.59	2461.1	1368.77	4053.27	2594.62	2071.43	1896.07	1956.06	2729.29	3038.05	1456	2496.67	1511.31	1966.62	1805.35	1905.27	2118.88	32.5037
5701	PSMC2	NM_002803	1340.89	883.314	396.371	697.951	3235.95	577.396	459.106	770.366	1134.54	1432.28	586.592	651.512	831.585	1027.83	993.859	599.333	673.89	926.707	1006.97	1170.66	1211.28	882.521	1618.72	638.214	1281.59	475.928	619.832	625.268	795.188	572.498	1378.77	1276.51	803.515	523.239	1691.57	481.934	1807.8	311.833	1367.22	740.711	779.686	808.237	1919.1	976.936	54.3489
5705	PSMC5	NM_002805	1441.18	1201.08	515.578	1376.64	3249.99	1358.82	812.335	1022.67	1978.2	1328.77	776.7	1137.39	1310.05	1844.5	1661.8	1294.86	1201.37	1994.47	1218.54	1599.32	2015.72	1258.61	1291.09	2539.25	1072.25	1105.89	1029.54	674.553	1134.92	974.779	1331.19	767.37	1109.54	1527.04	1269.35	1780.69	1763.47	632.652	1573.26	828.212	964.476	1336.57	1761.72	1350.38	38.0096
5706	PSMC6	NM_002806	1182.41	508.406	349.686	1371.95	3123.99	876.636	881.395	1009.31	1365.61	1425.38	552.638	256.748	333.992	810.674	1014.37	348.326	506.07	900.326	790.119	2227.66	990.134	1057.16	1055.61	798.935	702.567	547.83	321.354	299.774	588.696	423.127	918.768	920.587	818.985	386.981	1419.7	341.052	1086.01	212.485	1648.14	869.048	747.434	1003.36	1434.56	893.674	61.7957
5707	PSMD1	NM_002807	1145.38	1019.14	584.164	679.736	991.43	883.859	540.934	564.905	523.991	523.28	652.85	971.196	910.588	1549.84	1283.53	1071.27	1127.78	1079.4	599.944	1505.48	1302.23	1103.7	711.639	1169.13	1127.34	924.141	673.808	460.392	982.709	718.541	1536.93	500.128	1190.81	795.891	854.115	742.488	871.61	527.752	945.642	513.097	837.734	861.254	1091.92	898.876	32.7077
5708	PSMD2	NM_002808	1309.01	2616.37	932.876	1758.72	2817.7	1933.59	874.23	1012.48	1146.44	1142.45	1093.32	930.927	965.148	1665.32	1478.29	1052.24	1261.68	1520.39	1085.8	1737.18	1795.7	1535.84	1018.89	2439.62	1452.35	1123.89	974.511	793.083	1489.4	716.463	2163.02	1263.67	1275.45	1080.3	1177.44	1808.48	2114.51	834.933	1435.32	1844.46	1070.92	1255.7	1356.99	1403.61	35.1647
5710	PSMD4	NM_002810	1019.13	814.216	364.171	750.26	1818.74	1184.13	1490.88	865.358	754.55	611.529	470.233	484.572	441.408	943.564	804.373	557.069	624.746	1119.2	525.575	860.053	784.92	748.294	837.449	1100.87	584.769	603.518	376.171	448.168	777.021	424.183	1075.82	298.289	576.609	487.164	641.556	1042.79	661.938	230.317	807.639	1492.64	900.889	707.585	845.04	766.451	42.96
5714	PSMD8	NM_002812	1984.03	879.282	324.39	531.885	2211.28	1295.79	690.862	757.778	745.205	531.57	367.535	391.72	463.054	993.994	829.901	481.449	568.896	781.596	476.4	1811.51	1171.25	922.114	1029.38	2062.22	257.969	1090.49	503.369	598.749	752.629	421.634	1286.52	177.851	1140.09	1004.73	1066.98	1929.4	829.872	252.053	907.514	917.968	1073.57	1063.06	1851.46	916.954	56.7882
5716	PSMD10	NM_002814 /// NM_170750	796.614	979.492	510.773	892.406	2170.03	830.515	693.037	638.632	912.918	1095.86	699.432	985.333	755.874	1197.42	1189.33	1300.36	953.965	1241.89	1116.62	1738.99	924.012	594.858	1328.76	861.345	1167.7	528.827	499.815	356.381	949.046	482.192	449.704	740.493	744.692	542.123	1054.4	617.61	3452.01	450.914	1334.82	873.252	872.291	990.98	761.212	959.928	54.7254
5717	PSMD11	NM_002815	1055.9	641.047	594.754	427.716	929.565	887.175	716.228	721.548	798.596	1817.37	705.426	608.135	818.423	906.398	677.742	488.345	627.21	779.487	512.107	2488.15	1081.93	1295.15	1003.62	1139.76	623.431	565.947	703.137	604.544	633.292	505.361	1017.82	357.58	944.745	626.961	964.482	1008.24	1123.64	516.457	802.539	642.32	667.248	843.24	1495.27	845.769	45.4042
5718	PSMD12	NM_002816 /// NM_174871	752.97	459.811	331.58	360.88	796.191	433.366	398.186	418.817	601.037	677.417	500.612	524.731	761.038	841.555	765.131	625.549	727.364	965.157	438.306	999.489	631.214	555.952	689.519	515.245	444.656	549.736	356.928	483.324	413.912	357.513	862.864	459.883	426.998	394.805	593.761	621.526	596.341	344.835	546.731	637.693	408.259	537.884	624.042	568.205	30.0001
5719	PSMD13	NM_002817 /// NM_175932	370.254	235.969	190.286	292.245	1397.14	457.727	637.571	538.353	550.597	638.575	315.407	196.311	253.6	331.666	289.704	163.643	230.337	315.576	366.851	638.927	387.438	589.967	333.901	530.29	144.634	237.612	244.503	230.33	394.23	242.761	404.879	177.164	370.636	507.821	473.028	341.191	469.415	136.374	660.125	550.298	325.037	502.91	601.934	401.563	54.2383
5720	PSME1	NM_006263 /// NM_176783	1415.29	2369.12	1802.18	3763.42	8753.26	4871.09	6360.37	4468.7	3642.55	5661.66	2366.11	333.349	135.636	417.955	621.47	714.843	238.931	685.494	1672.07	1354.57	2564.13	3070.9	1297.18	3537.4	1314.12	1096.01	1470.63	2328.28	2919.87	2459.33	843.749	1322.04	1568.62	1803.83	1461.64	174.29	3113.9	938.037	3752.36	4277.94	1627.45	1905.43	2019.13	2291.03	78.6363
5721	PSME2	NM_002818	965.041	2258.95	1250.33	2620.15	5757.76	4272.01	2472.6	3091.19	3171.04	3042.09	1877.64	374.88	310.279	497.258	560.843	496.737	345.409	589.006	1527.64	1847.02	2465.23	3079.51	1209.54	2283.82	1220.2	662.533	1004.2	1516.32	2742.81	1965.45	712.489	1161.03	1423.72	1254.2	1138.43	519.934	1839.85	762.066	3698.85	1853.51	1383.59	1887.45	2286.11	1753.46	66.4884
5725	PTBP1	NM_002819 /// NM_031990 /// NM_031991 /// NM_175847	826.853	1278.56	960.314	1261.24	1655.52	1805.59	1718.84	1384.54	2037.53	1443.34	1619.69	212.35	337.052	243.597	272.543	397.904	158.901	382.503	1482.06	2551.67	1579.32	1112.31	1131.51	2090.43	1141.54	501.406	949.444	959.302	1290.07	1318.51	171.118	767.469	1646.18	991.736	1095.36	696.161	2169.79	1145.2	1581.11	842.955	970.389	1447.24	1174.35	1134.96	51.4175
5757	PTMA	NM_001099285 /// NM_002823	4700.52	5563.75	3488.41	7944.96	8824.56	9427.6	4831.97	8672.51	11310.1	15459.3	6029.42	2610.19	1892.08	3369.64	4483.61	3045.3	2812.37	7866.39	7891.18	9640.06	6467.22	7049.74	6492.4	4732.13	8427.02	2117.57	4550.73	3366.89	4710.67	5718.56	1429.78	3111.9	4140.67	4544.18	6437.15	1961.55	5505.71	5036.24	7049.54	6733.8	8250.46	7031.1	6677.08	5846.65	47.8896
5770	PTPN1	NM_002827	315.86	498.861	405.49	792.445	660.719	736.156	536.344	530.772	778.8	813.79	772.699	407.714	365.356	295.592	286.267	328.909	353.169	268.824	363.127	282.93	480.893	178.147	318.268	372.956	686.286	428.084	509.154	424.632	419.239	685.303	244.184	327.895	546.308	512.706	300.452	337.452	579.357	591.53	788.031	486.49	148.559	307.899	257.006	458.713	39.7194
5800	PTPRO	NM_002848 /// NM_030667 /// NM_030668 /// NM_030669 /// NM_030670 /// NM_030671	4499.55	2523.54	1699.18	2536.73	2039.9	1699.85	2636.41	2499.83	2776.78	4103.98	2033.65	7801.65	3516.4	5779.78	6901.9	5832.79	6017.47	10282.8	1729.84	1055.82	1836.83	6597.23	5281.75	1792.67	1167.76	4639.05	6715.56	3769.66	1898.48	2199.59	4129.96	1008.35	3183.52	817.797	2569.16	1624.75	645.402	823.215	2070.42	1455.81	6013.2	2277.82	3848.05	3356.6	65.846
5805	PTS	NM_000317	437.325	2783.77	404.292	241.669	481.142	378	294.775	190.718	545.947	1515.84	422.249	587.91	503.655	816.016	826.436	926.903	663.82	1108.18	615.92	799.995	1401.8	740.282	538.336	819.228	753.357	562.306	797.184	636.69	624.787	187.291	1171.53	773.316	863.559	584.188	534.407	290.472	799.387	303.971	397.552	186.265	623.2	674.352	689.766	685.995	64.3676
5813	PURA	NM_005859	771.585	507.424	440.233	502.476	517.28	352.308	417.388	675.903	891.079	681.986	382.372	1325.53	1880.67	1409.33	1791.3	685.179	1032.93	1876.77	765.257	535.051	441.959	581.339	643.417	228.319	858.971	703.447	773.886	370.85	459.25	530.102	482.617	203.083	641.603	946.463	1096.08	283.318	737.587	377.09	514.882	244.062	825.606	572.352	1019.96	720.425	57.5243
5828	PXMP3	NM_000318 /// NM_001079867	751.195	346.401	279.081	591.028	882.803	517.201	622.455	512.03	612.111	1126.03	418.955	287.979	188.988	318.77	509.303	366.403	267.235	573.68	454.887	612.402	410.781	480.963	770.582	519.708	436.907	491.888	472.918	293.232	435.018	316.716	699.174	347.738	292.358	364.916	547.781	223.475	631.609	194.849	664.901	473.884	409.134	511.336	555.355	483.352	38.989
5859	QARS	NM_005051	2190.76	2283.47	2219.12	3259.39	7059.79	3760.68	1362.69	2652.09	3443.54	3161.53	2614.04	681.968	640.287	1025.9	855.576	773.211	779.792	909.564	2575.99	2290.54	3981.21	3428.05	1646.95	5713.44	1787.35	1718.32	1897.03	1867.17	2655.99	2075.34	3013.25	1809.65	2164.58	2271.36	2717.86	1747.87	1877.41	1487.7	3533	2563.09	2036.09	2256.61	4076.51	2392.23	53.3677
5860	QDPR	NM_000320	2321.19	2736.47	190.509	157.366	1335.38	321.082	114.688	268.003	335.9	178.17	447.792	6354.26	2598.68	5561.31	7336.37	7169.3	5294.14	12892	700.052	273.624	498.393	534.438	1086.65	873.843	410.643	1181.18	2424.26	4439.94	520.054	319.815	1549.73	661.924	281.391	774.444	546.951	360.394	418.388	473.004	660.911	337.268	277.678	610.24	566.514	1776.61	148.738
5861	RAB1A	NM_004161 /// NM_015543	2106.68	1575.53	938.437	943.515	3612.81	1984.29	2576.34	1370.22	1283.8	1064.43	1083.79	932.105	1140.75	1856.42	2153.81	1189.28	1254.15	2005.51	1445.1	3595.61	2086.2	2568.31	2871.85	1732.88	2191.57	1257.32	1399.67	1244.81	1198.99	653.513	743.589	1390.54	2484.04	1096.7	2363.5	1539.91	1392.76	862.883	1653.91	1390.69	1916.48	2213.58	2791.64	1701.35	42.0136
5862	RAB2A	NM_002865	1261.26	746.384	500.469	497.227	749.619	864.986	1567.9	640.563	545.729	641.426	602.062	1038.44	769.486	1438.72	1455.81	1081.34	993.631	1173.64	597.598	1477.15	1144.84	977.625	1288.61	1771.66	913.986	948.233	609.289	633.974	497.747	425.012	1109.01	528.757	1074.49	462.975	926.102	548.883	571.777	492.334	516.793	790.999	1058.85	792.419	978.162	876.883	39.2383
5863	RGL2	NM_004761 /// NR_028387	510.946	759.214	812.79	712.411	826.861	860.484	2327.68	723.894	588.652	249.899	292.113	610.797	703.835	437.112	484.935	544.071	332.293	484.734	1146.78	569.431	965.056	267.486	642.117	1217.18	1474.64	582.045	426.097	233.021	1013.33	903.228	622.928	299.625	1166.26	1060.11	531.698	322.239	817.748	629.163	703.916	566.898	433.684	669.08	600.802	700.635	54.1635
5867	RAB4A	NM_004578	446.762	237.937	253.493	271.016	1000.14	480.713	178.319	356.528	387.825	255.29	255.226	395.48	393.965	477.473	616.615	440.289	434.008	814.983	379.955	584.517	485.044	573.254	536.073	621.506	302.206	496.71	218.249	572.927	346.895	185.49	500.298	577.714	247.492	584.086	595.421	464.656	335.606	278.722	444.27	174.43	373.772	360.38	578.929	430.574	39.7641
5868	RAB5A	NM_004162	1439.24	724.014	624.803	705.231	1847.97	1657.08	2320.46	1193.46	1129.94	1257.1	762.74	793.303	891.25	1539.99	1697.36	1150.55	1102.63	1992.12	1535.78	2555.85	1902.32	1016.28	1946.06	1401.71	1026.05	839.412	590.113	481.77	659.73	544.216	660.933	937.046	1463.64	680.596	1639.49	587.272	1640.42	465.638	1243.08	1759.19	1004.34	1009.14	1828.12	1215.06	43.6724
5869	RAB5B	NM_002868	507.633	564.86	566.346	290.557	257.14	400.017	1611.26	645.822	661.507	594.111	446.141	917.982	1066.51	915.284	1017.81	1001.51	799.835	1174.05	525.743	605.3	763.429	917.794	902.158	1380.81	477.533	692.417	638.222	463.06	530.573	614.939	700.224	325.679	744.552	751.798	785.84	709.178	456.914	467.827	544.264	1671.65	1078.63	885.518	591.03	736.36	42.9405
5870	RAB6A	NM_002869 /// NM_198896	177.821	235.623	132.639	152.899	217.921	185.235	390.805	254.48	233.601	179.107	154.024	332.861	379.189	786.35	690.351	368.079	522.006	570.195	254.472	511.626	428.549	213.566	413.516	353.722	188.876	247.863	192.061	114.057	159.377	127.565	190.473	161.969	336.059	129.853	268.95	126.068	234.426	107.658	207.364	441.837	194.653	273.321	344.16	283.377	55.1087
5876	RABGGTB	NM_004582	629.62	686.02	173.243	1006.11	3715.75	439.63	264.019	489.173	1342.58	2093.74	514.946	395.229	455.041	533.738	730.463	524.467	392.482	932.999	791.278	2600.84	534.857	512.885	632.062	313.33	622.189	488.709	447.223	326.062	405.423	329.472	547.557	1065.95	386.995	273.183	715.359	170.709	1366.1	175.542	1351.19	467.387	517.153	509.811	858.6	737.887	90.6419
5879	RAC1	NM_006908 /// NM_018890	3530.57	7174.81	3738.24	2354.27	8350.23	6359.68	8514.81	3577.66	1761.62	1508.31	2167.51	3455.88	2940.68	4782.54	5619.04	3361.38	4047.21	5695.77	5903.07	5360.23	5743.45	7085.87	2728.63	6984.58	3943	2801.61	2781.72	1974.29	4100.39	2353.14	3489.5	4390.84	3637.76	3516.42	4666.88	1509.42	5739.01	2407.28	4748.12	4401.52	4613.1	3770.32	5259.75	4252.33	41.6807
5885	RAD21	NM_006265	1405.96	816.504	276.595	718.418	1822.97	755.287	2486.1	1150.07	2044.54	2175.47	711.046	784.756	787.976	1038.25	1371.33	1037.59	807.742	1805.13	699.253	1906.87	470.046	1044.39	1175.76	494.543	861.021	877.437	611.852	518.565	432.734	751.921	783.921	431.609	875.348	412.898	976.741	1197.71	946.119	491.428	1082.17	1172.14	1401.55	852.291	993.685	1010.64	50.1071
5887	RAD23B	NM_002874	2211.28	631.749	330.605	553.071	961.686	898.309	1324.56	824.004	576.218	524.859	588.425	430.972	595.263	846.604	1071.08	634.77	593.229	649.395	840.069	1772	1065.53	1411.39	1776.1	1092.95	1131.47	825.519	619.495	963.942	552.377	423.979	1628.87	503.822	1476.55	602.571	1596.7	598.388	978.437	448.277	726.079	648.78	761.056	1044.41	1317.14	908.186	47.7182
5894	RAF1	NM_002880	675.325	704.508	481.439	1154.13	1703.81	1199.74	6483.52	1471.25	1430.08	1775.25	1034.24	380.957	880.891	716.802	584.832	483.192	364.898	518.967	836.196	1307.54	1171.16	716.765	579.61	1060.52	943.764	1222.03	657.89	626.728	702.77	741.349	1840.97	324.798	983.634	693.19	888.273	434.024	900.192	520.287	1014.63	1681.04	1197.94	867.836	758.022	1039.88	90.0972
5899	RALB	NM_002881	628.759	286.494	286.548	433.141	1845.59	1301.78	3870.67	1005.63	291.092	132.61	330.242	307.785	213.402	682.853	586.133	349.442	486.021	559.996	281.143	486.482	743.141	741.181	404.801	961.476	202.074	402.223	369.887	223.733	359.019	371.5	196.793	175.516	597.508	372.271	536.299	334.378	166.43	218.423	431.24	1153.75	330.788	498.002	663.551	577.205	106.481
5901	RAN	NM_006325	2193.96	2347.33	1258.34	4409.3	6783.19	2291.6	1156.87	2273.04	3839.41	4598.62	2874.37	1225.19	1204.1	2341.4	1928.94	1487.14	1694.43	2025.18	1647.5	6415.62	4167.85	3008.69	2157.2	3746.37	1557.02	1287.01	1462.43	1302.89	1839.84	1787.71	1767.29	1135.83	2215.8	1662.9	2137.18	4152.57	4556.41	1007.15	4504.66	1594.94	2097.33	2787.93	4015.1	2556.92	55.2319
5903	RANBP2	NM_006267	775.253	504.577	317.911	561.888	742.395	347.366	618.342	618.296	1007.04	2625.91	610.828	386.393	455.349	610.102	676.737	405.725	424.484	632.619	583.686	1078.15	558.356	332.646	1064.86	344.182	668.027	439.546	417.55	249.788	384.574	400.475	436.942	343.848	862.857	444.248	707.872	1298.24	421.381	238.38	660.029	707.065	500.867	650.03	592.244	621.094	62.5047
5906	RAP1A	NM_001010935 /// NM_002884	2071.19	793.768	861.187	1373.5	4618	3501.66	4689.77	2506.02	3513.43	2712.57	1090.78	793.804	504.362	703.496	1243.95	1155.48	561.764	1561.61	793.33	1350.68	944.89	2758.68	3436.7	1747.69	878.11	1364.72	977.363	1125.89	870.491	1278.01	1252.33	1118.46	880.909	809.235	1627.93	351.513	1381.84	806.337	2394.48	3129.02	3470.87	961.87	1927.91	1671.99	66.5335
5912	RAP2B	NM_002886	729.222	411.285	860.654	930.047	3983.64	2971.62	1193.35	2141.88	2518.68	1912.69	1161.38	339.028	160.723	443.61	749.95	403.541	363.909	278.705	1019.32	470.1	1755.3	951.441	782.888	1918.51	1158.22	447.246	293.768	430.449	682.77	880.791	257.448	965.062	731.566	310.574	1068.02	245.263	1570.89	338.061	1696.83	1624.3	614.537	732.237	788.969	1006.71	79.8271
5921	RASA1	NM_002890 /// NM_022650	894.991	563.886	519.269	937.51	1270.18	796.364	723.131	655.812	1194.35	759.74	605.353	661.228	726.371	1445.93	1305.19	841.679	981.145	782.648	1074.34	1004.61	693.962	640.691	1106.28	673.118	1134.84	588.39	442.27	311.905	608.56	645.643	444.04	731.969	8901.13	465.737	868.14	924.297	883.291	491.752	661.59	596.797	487.353	761.134	723.678	965.821	130.93
5928	RBBP4	NM_001135255 /// NM_001135256 /// NM_005610	609.831	490.457	576.503	721.975	917.036	892.194	883.314	850.071	1015.6	1193.2	1201.63	492.725	433.368	682.103	759.823	727.863	535.068	766.745	614.614	1334.46	612.888	528.077	1496.51	798.707	440.157	701.111	608.725	447.081	527.699	803.79	482.661	472.027	624.739	560.522	602.368	1906.59	835.58	419.222	1127.14	797.989	586.393	1250.89	530.198	764.178	41.7314
5931	RBBP7	NM_002893	1676.24	6759.69	1441.35	2287.94	3749.78	1346.76	880.779	1477.01	2332.93	2197.31	1974.2	1188.54	738.427	1392.89	1344.68	1171.9	1067.28	1084.76	2472.28	1556.09	1918.8	1531.06	4681.52	1744.52	2238.47	1443.89	1522.1	936.685	1452.28	1412.95	1664.15	1711.1	2544.74	1929.59	1647.71	2292.83	2573.91	1267.21	2293.62	1516.94	2114.99	2060.68	1437.6	1908.8	54.7689
5934	RBL2	NM_005611	816.834	338.611	155.516	582.477	876.355	504.562	1579.37	1431.15	2361.63	1656.25	324.711	154.185	131.474	138.475	341.414	221.792	121.435	425.046	365.505	281.114	333.152	258.284	869.134	189.359	324.269	191.475	225.97	581.323	217.402	520.731	165.67	350.763	117.212	204.669	624.76	698.962	426.359	149.664	596.213	831.794	340.076	468.353	557.502	512.814	91.5776
5935	RBM3	NM_006743	1823.19	500.29	289.896	777.675	4102.76	1320.91	591.483	1968.37	2302.01	3419.05	1008.93	129.27	130.752	252.162	341.92	172.523	156.378	669.754	1042.5	1526.08	609.478	828.737	1232.06	1077.77	671.379	426.798	299.033	373.761	526.218	724.905	411.687	312.892	735.316	315.262	2058.33	337.311	402.827	194.204	1766.17	944.172	1637.93	1115.12	1619.76	956.908	90.1454
5970	RELA	NM_001145138 /// NM_021975	335.652	334.746	258.749	305.619	525.682	566.891	1708.46	549.078	898.98	1087.32	409.941	210.08	238.383	140.783	162.269	252.654	150.502	219.888	364.268	2120.45	321.867	213.966	399.518	754.711	206.399	306.391	271.555	332.999	330.446	664.991	229.226	163.191	290.702	290.741	384.965	229.273	322.59	317.129	522.035	555.077	363.423	499.215	288.335	444.166	86.7743
6009	RHEB	NM_005614	594.23	1099.73	434.296	269.341	628.684	598.48	359.504	329.126	560.503	357.947	526.442	498.426	417.945	908.39	1004.59	630.262	664.81	764.649	659.868	1308.21	521.599	530.442	1087.99	525.242	504.731	547.127	460.802	572.166	396.528	226.07	697.733	804.479	876.039	416.708	780.37	427.534	771.191	386.351	542.274	428.882	1087.84	749.748	748.05	621.054	39.174
6015	RING1	NM_002931	470.394	469.837	359.53	252.203	652.973	533.663	286.015	431.535	514.621	395.774	361.035	489.163	682.781	487.603	510.327	464.477	439.234	473.491	402.633	572.788	670.984	298.235	341.336	623.173	351.135	369.366	414.244	312.472	757.622	652.023	322.607	227.267	328.11	669.498	338.175	450.892	753.708	872.538	538.576	271.752	334.215	611.863	542.017	472.137	32.3849
6018	RLF	NM_012421	363.25	248.264	388.412	805.901	723.449	456.938	519.844	462.803	638.706	1116.51	530.112	281.933	394.383	408.427	367.91	314.556	321.765	278.238	405.765	1365.06	628.249	267.076	289.858	217.875	531.814	266.491	194.018	156.779	298.684	378.064	256.257	339.424	285.346	342.079	353.09	509.976	390.738	212.529	456.964	629.633	361.789	323.772	360.728	428.918	54.0729
6046	BRD2	NM_001113182 /// NM_005104	743.421	921.58	559.114	707.741	901.952	1032.91	2503.67	1314.64	1717.13	2045.64	1218.08	683.326	955.099	730.383	763.209	639.615	555.593	745.224	999.749	1562.71	986.411	704.163	1077.56	753.691	1001.94	524.133	758.503	670.609	754.456	1212.37	291.725	413.024	995.512	708.511	737.247	1510.19	1091.62	966.953	1026.65	769.425	719.61	852.446	737.77	943.379	44.2711
6050	RNH1	NM_002939 /// NM_203383 /// NM_203384 /// NM_203385 /// NM_203386 /// NM_203387 /// NM_203388 /// NM_203389	1322.36	1736.62	910.736	673.183	7489.51	3128.17	965.066	1292.6	1200.28	696.509	1121.01	984.39	786.157	751.696	473.528	992.118	602.736	930.246	687.469	1340.64	2166.1	877.941	876.387	4228.88	1100.62	1485.1	963.067	697.472	1498.99	1273.02	977.385	452.497	1211.95	1106.54	1560.86	947.364	1244.94	1467.84	1942.31	892.888	1232.76	1296.1	1602.31	1376.47	84.7371
6051	RNPEP	NM_020216	538.951	589.418	446.081	371.895	2345.36	1584.72	1344.95	813.229	601.589	521.145	638.231	164.34	371.611	279.307	312.896	273.48	186.753	239.217	598.745	524.777	994.781	1433.56	806.046	1850.09	642.758	367.682	569.944	579.806	1061.77	673.219	231.004	199.26	822.898	831.949	669.479	599.687	632.503	860.161	1065.17	585.827	362.236	783.386	636.444	697.822	65.0187
6059	ABCE1	NM_001040876 /// NM_002940	542.081	222.313	324.34	642.602	841.895	249.984	189.55	629.696	747.567	757.778	519.909	308.286	281.226	404.071	463.846	366.414	344.416	479.92	501.834	1479.96	587.685	396.288	497.776	356.322	576.585	336.812	259.121	243.866	348.879	392.127	328.656	605.09	321.92	302.381	532.392	415.282	858.345	190.871	832.675	332.323	498.895	500.291	550.508	478.204	49.3878
6093	ROCK1	NM_005406	1187.62	308.522	717.977	1367.78	2996.76	1582.39	2586.61	1683.07	1778.28	1825.37	696.163	370.574	380.209	371.233	509.318	469.712	230.437	553.451	925.295	1323.41	510.955	531.707	1537.83	497.235	714.898	697.352	409.386	265.057	597.782	884.923	240.678	694.209	647.142	487.395	961.925	568.795	1430.14	203.968	1644.28	1155.83	1443.83	856.758	1056.06	927.961	68.0634
6117	RPA1	NM_002945	681.745	591.315	451.289	1194.35	2088.21	767.923	869.546	922.294	1392.37	1034.55	685.532	318.124	385.714	449.371	528.15	443.439	282.858	499.349	631.178	678.524	732.912	533.331	630.88	883.065	658.316	508.73	210.701	327.574	445.027	733.936	514.145	228.79	454.439	536.989	901.332	386.9	844.638	237.593	1394.43	1295.06	569.988	617.817	778.028	681.871	53.8394
6118	RPA2	NM_002946	625.543	403.853	729.919	1030.68	1074.14	958.656	1076.3	1025.3	1591.49	1245.31	1045.52	900.259	823.743	748.613	736.429	928.1	730.666	491.886	687.079	293.215	694.747	375.06	591.444	988.082	751.525	777.094	556.353	571.956	804.391	1156.8	1088.63	621.99	484.813	722.383	569.08	1250.13	1311.99	493.101	1154.15	678.132	473.772	697.914	370.507	798.39	36.4001
6122	RPL3	NM_000967 /// NM_001033853	13720.6	24349.4	18030.7	38714.8	24746.2	20669.3	12621.2	22095.5	22493.3	28569.1	20478.3	7118.93	8966.23	9518.92	8507.38	7068.11	7474.57	10461.9	21130.3	18802.9	25343.8	19017.1	17146.8	18483	19103.9	6725.52	10879.8	11753	17831.5	18892.2	3238.42	18613.8	11743.4	21674.5	17384.3	10164.2	14867.9	12645.3	17163.4	19439.2	22379.5	16333.6	26570.7	16812.4	41.7294
6124	RPL4	NM_000968	10344.4	9051.6	8567.17	21477.8	19414	14438.6	6229.81	14485	16829.2	18074.3	11858.6	4756.91	3812.65	5603.6	5769.15	3966.79	4550.8	6881.59	12344.3	15704.2	14601.5	9421.49	9721.5	11623.9	14682	5436.66	5324.05	4965.99	9217.61	10569.4	11681.7	9450.78	4468.3	10442	11528.2	4124.03	12039.2	5847.57	11537.1	13545	12119.6	9699.99	18636.3	10345.2	44.8922
6125	RPL5	NM_000969	11969	14329.4	7910.18	24175.4	21073.3	13339.5	5982.31	12921.1	15573.7	20351.1	11121.5	3433.81	3572.74	5013.18	5766.83	3317.48	4089.16	8261.9	15665.4	14730.9	14248.8	12840.3	10651	7670.41	13363.4	4856.18	6254.49	6199.73	8422.39	9929.01	8204.04	18743.3	5940.22	10963.7	11636.1	4930.9	11898.8	6848.27	12061.4	16751.7	22546.4	10820.5	16441.5	11042.3	49.0587
6128	RPL6	NM_000970 /// NM_001024662	12033.5	10266.5	7675.5	19639.8	20397.1	12760.1	7599.21	11388.6	14131.2	17470.9	9007.88	3574.54	3745.82	5332.03	6051.59	3775.66	3979.17	7912.29	9512.07	12239.1	12838.9	11094.9	12275.2	8949.37	10038	4753.32	5743.55	5772.62	6238.98	8603.52	9004.79	7393.9	5269.37	6979.12	11073.3	3078.62	6761.58	4771.82	11263.2	10831.2	12291.1	10186.6	16013.5	9295.79	45.3352
6129	RPL7	NM_000971	19138.1	12532.3	13319.1	30684.6	24427.2	18896.2	12280.2	17466.1	20164.9	25707.4	15777.3	7227.75	7356.68	9182.64	9189.8	7138.61	7115.6	10864.7	20555.2	17259.4	23156.2	19481.2	15548.1	13961.3	17645.6	7870.36	9637.29	7882.32	14739.8	14084.8	16312.8	19559.5	10488.2	14576.8	15674.2	6510.88	14422.3	9183.25	15309.8	20346.4	26150.9	15262.6	24181.7	15308.6	39.0917
6130	RPL7A	NM_000972	16023.4	23588.9	16465.6	33532.2	20721.7	22062.9	14003	21487.7	21143.7	27236.8	21850.1	5806.34	6472.26	8224.7	6720.97	6255.15	7271.04	7482.87	19808.3	19980.3	28309.7	16246.8	14330.9	19778.9	21620.5	8480.96	10637.6	10564	18097.3	18257.3	14994.9	16798.5	10969.8	17045.9	16436.5	10379.4	21470.1	12776.5	15348.7	21741	20689.7	16221.1	25593.5	16579.7	39.6855
6132	RPL8	NM_000973 /// NM_033301	7290.02	11757.7	6036.47	17329.5	22497.2	14616.6	7740.97	13593.3	17248.8	16914.1	11355	2608.57	3471.49	3916.87	3306.87	3300.71	3321.54	4763.12	11919.3	16381.2	13197	11420.2	9286.65	17470.5	10628	6902.32	6413.87	7318.48	10393.7	10743.3	10333.3	12400.7	5603.72	10264.6	11228.3	5074.25	11367.5	8549.49	12754.7	14002.3	13745.3	10471.3	17821.1	10389.8	46.1291
6133	RPL9	NM_000661 /// NM_001024921	21998.3	15230.2	15861.3	32295.7	26923	23561.6	15654.5	20411.4	22978.3	27922	16840.9	7600.66	9110.59	10635.3	10894.1	6949.11	8338.9	13684.1	19788.3	19107.2	21904.4	24073.5	19045.8	17323.3	17418.4	9984.13	10749.7	9664.07	15996.5	16615.3	18544.9	21322.1	11990.7	16174.3	16908	8110.89	15829.2	10000.9	17059.2	20487.7	32587.1	16209.9	27488.6	17238.9	37.5762
6134	RPL10	NM_006013 /// NR_026898	2741.05	2900.52	2244.63	5561.47	5500.68	4554	3154.79	4427.74	4524.97	5679.47	3994.36	710.731	909.424	1137.64	991.974	891.471	836.83	1318.95	3781.49	3489.68	5236.03	2189.5	2796.93	2848.57	2955.69	1758.24	1518.35	1876.76	2958.03	3619.35	2787.35	3372.38	1777.39	3296.12	2537.94	452.383	4208.18	1576.45	3173.63	4415.64	5204.1	2986.54	4530.72	2963.44	49.5581
6135	RPL11	NM_000975	13075	5279.19	6476.92	8805.33	9905.71	11338	10505.3	12863.7	16260.4	22263.3	9151.74	2908.71	3556.3	4001.58	4863.21	4155.56	3500.88	7458.79	8837.86	12442.7	11233.6	10788.5	10397.1	9844.84	5573.86	6050.53	6151.25	6649.22	7955.88	10789.2	7612.59	6994.9	4834.37	8100.64	10763.3	4110.36	9320.34	4958.41	7904.67	13316.7	12385.2	10714.8	16310	8846.76	45.121
6136	RPL12	NM_000976	11744.5	12466.9	10407.5	33266.7	20708.6	17268.6	9507.39	18356.9	18214.6	24345.6	13919.8	2268.37	2942.93	3797.71	3698.56	2865.38	3446.32	4895.96	19911.4	16950.7	22333.6	13172.3	14743.1	15286	18117.4	4775.16	5823.96	7126.79	13215.8	14167.3	11515.4	14047.8	5958.59	15286.7	13607.9	3725.17	16167.4	9115.88	13591.2	23215.4	15063.8	12523.3	22024.7	12920.7	53.9631
6137	RPL13	NM_000977 /// NM_033251	7175.76	7869.91	6672.68	15312	10000.7	9220.48	8369.11	14028.3	13909	13453.6	8686.73	2393.18	2799.81	3371.06	4213.98	2903.58	3240.83	5623.34	9580.26	11929.5	11968.3	10748	9888.86	10475.7	9102.38	3779.55	4605.94	6088.03	8463.29	10196	7840.98	6798.24	3745.36	10451.7	9332.79	4439.68	7438.01	6201.56	7626.49	15739.2	10709.6	8319.35	15154.8	8369.01	43.5572
6138	RPL15	NM_002948	7934.41	10402.4	5809.1	22613.7	19712.7	12201	4782.19	9649.1	11553.2	16253.6	7711.16	4554.79	4769.22	6263.61	6134.66	4430.5	5196.35	6428.9	12170.1	13927.5	10063.5	7396.41	9937.83	6983.94	14537.1	4073.22	4621.61	4275.28	6811.81	7253.79	5087.38	10958.8	4222.7	6987.38	9272.8	4014.32	9070.71	5235.89	10233.6	10069	9289.94	7942.6	12338.3	8678.52	48.3953
6139	RPL17	NM_000985 /// NM_001035006	11289.8	11176.8	11352.2	19691.8	17027.1	15811.7	10819.1	15678.6	18418.2	22769.6	13047.1	3649.23	4653.18	5869.31	5985.04	4164.65	4477.43	7580.88	16046.7	17539.4	18333	14337.3	13578.5	11674	13432	5291.36	6360.15	5259.41	10463	11752.5	8253.38	11051.3	7259.14	11145	12277.7	4820.41	10974.5	6634.27	10878	9933.74	15208.5	11862.3	21469.9	11379	43.7152
6141	RPL18	NM_000979	8679.92	9239.45	8182.61	15437.7	14156	11950.9	7955.41	15292.3	17311.3	20585.2	11557.8	3453.54	4870.31	4685.42	4883.26	3096.78	3975.44	6597.45	9826.22	15962.8	15058.7	14000.5	10955.8	15664.7	10315.3	3883.36	5167.25	8164.23	9329.93	10895.9	7951.69	6409.42	7052.84	11522.8	12029	3913.23	8880.92	7890.24	10231.8	14565.5	7447.2	11044.8	21184.4	10029.3	45.6324
6143	RPL19	NM_000981	10944.7	11851.5	10765.7	25284.3	16526.5	15842.8	14083	19034	18690.8	23019.6	11702	3576.08	3337.26	5246.12	5021.24	3905.06	4483.43	6126.48	12965.6	14892.4	16023.2	12014.6	12182.4	13565.8	12913.2	5279.09	6245.51	9051.38	11071.1	13488.9	11380.9	8762.07	7124.51	9868.07	11646.6	5678.42	10206.7	7883.79	11434.7	21001.2	15296.8	10563.8	16961.8	11556.8	45.4758
6144	RPL21	NM_000982	13193.2	7479.92	11627.6	21721.8	15636.8	15530	17496.8	18213.5	17551.5	22015.3	13516.8	6776.32	5708.85	7364.2	7905.19	6121.11	6580.57	12673.6	12202.7	15061.9	18365.8	18077.2	13464.6	11323.8	15853.9	7188.27	8239.94	7059.86	11665.5	13789.8	15943	14147	7191.45	12069.1	11994.1	4093.21	8784.66	8863.56	11298.8	22869.6	16469.3	10701.5	20183.9	12651.5	38.5355
6146	RPL22	NM_000983	8499.97	5466.26	5744.25	14610.6	13850.2	10322.4	4473.71	10023.9	12491.1	15362.6	8341.52	3250.35	3386.38	4312.2	4263.72	3553.27	3342.95	4962.66	10187.9	10156.2	14172.6	6824.25	7433.43	9204.42	11437.9	4220.9	4963.14	3692.22	6596.47	8601.66	8258.52	5475.79	3435.99	6720.02	7542.23	2455.72	8879.21	3962.58	8667.03	7721.94	10146.5	6936.82	10588.3	7547.44	45.5401
6147	RPL23A	NM_000984	23329.2	24298.3	25964.2	41995.8	22735	29478.7	22769	34621.7	28270.2	34377.6	25924.3	13428	11865.3	16370.2	15695.6	12683.2	12836.6	21203.7	24319.6	24146	41086.7	34006.2	22223	22298.3	28892.4	14137.1	16131.7	14432.8	28194	24486.5	30120.8	22710.1	18725	26415.4	19868.7	10025.7	22286.9	15511.8	19776	32947.2	35653.2	20519.3	36761.2	23802.8	33.7366
6150	MRPL23	NM_021134	540.392	949.046	239.795	563.462	1086.05	941.915	306.314	512.244	597.796	284.005	589.058	381.906	258.698	421.075	601.316	319.546	306.191	699.627	311.955	491.035	814.775	958.673	662.241	1469.97	289.859	618.221	550.34	1035.85	918.563	399.87	1010.73	416.417	323.012	581.237	669.378	230.442	323.986	600.601	619.516	567.953	345.125	664.756	1294.7	599.248	49.4333
6152	RPL24	NM_000986	11509.2	13734.5	8408.19	19665.7	17357.5	13547.3	8018.03	14110.7	16953.6	21732.4	10085.5	4773.31	5236.21	7353.7	7840.35	4856.19	5690.56	9494.19	13014.2	16842.9	17504.8	15510.5	12614.8	10972	13493.9	6309.82	6586.91	6542.2	10529.4	10221.3	12384.5	12739.1	6684.14	8770.83	11477.6	4214.1	10207.4	7670.04	10389.5	13209	14651.5	12294.4	17038.4	11214.9	38.5022
6155	RPL27	NM_000988	15201.4	12704.8	9472.99	25537.1	19119.8	16718.7	12184.8	16088.3	18599.9	23201.5	12106.7	5196.74	4834.84	7669.59	8520.06	5479.48	6474.9	10193.1	16680.2	13538.6	20703	17331	11700.9	13747.8	17520	7376.65	7947.14	8979.96	13101.7	13438.7	18826	15351.8	8454.72	10637.3	12627.9	5322.66	15426.5	8142.33	12731.4	17189.5	22936	12391	17810.3	13237.6	39.2729
6156	RPL30	NM_000989	20210.7	19751.5	15410.7	43450	26218.7	27030.8	19019.1	24837.1	25157.7	31009.8	17372.3	6172	5885.23	7598.41	8147.75	6811.01	6719.15	11945.7	22386.6	19818.3	25499.1	20227.2	15948.5	19366.6	20258.3	9457.21	9380.45	10056.4	15475.2	19159.9	20093.7	21385.6	9519.08	13204.1	16504.6	7784.46	20255.4	11522	17267	26827.4	19860.9	13915.3	26735	17550.1	44.8728
6157	RPL27A	NM_000990	21263.1	14386.9	18895	22968.9	19711.3	19169.7	21545.5	27771.4	24654.7	30296.9	20390.6	8011.02	8361.86	9801.29	9717.93	7687.04	8105.99	15740.4	17321	18258	26809.8	25888.8	17991.1	20018.7	18374.4	10526.2	11482.8	14036.8	21039.2	20085.7	23197.6	14056.8	14107.5	20803	16802.5	7601.07	17059.5	17140.9	16729.4	31989.9	37587.2	19093	30940.9	18544.7	38.0069
6158	RPL28	NM_000991 /// NM_001136134 /// NM_001136135 /// NM_001136136 /// NM_001136137	2708.42	3379.61	2505.35	6321.2	5827.77	6987.39	4556.59	7270.58	5699.14	7696.97	3834.28	947.05	799.08	1391.68	2205.76	1145.61	1279.58	2219.06	2238.56	7978.25	4497.2	4732.72	3950.62	5436.76	3074.25	1174	1436.02	2417.76	3095.32	3831.62	1839.51	1765.38	1658.13	2660.83	5200.33	1536.69	4282.74	1912.16	3089.44	10175.8	3032.36	3845.31	10511.6	3770.89	64.3551
6159	RPL29	NM_000992	9113.62	7886.04	5461.03	12359.8	11555.5	11970	5922.53	11840.9	13894.2	17226.3	9946.46	1823.84	1701.86	3197.13	3446.65	2170.98	2896.88	4109.53	9263.31	12515.9	18082.9	9549.63	10140.2	14198.7	8874.08	3990.62	4516.72	5851.21	8042.67	10291.3	13499.3	5660.17	4018.81	9758.38	10346.8	3456.23	7664.21	5788	8202.06	11932.3	8138.66	9024.56	17543.3	8531.93	50.6326
6160	RPL31	NM_000993 /// NM_001098577 /// NM_001099693	6911.14	5351.45	5526.63	13840.4	9487.07	8255.66	5532.86	7684.17	9396.24	11845.9	6026.45	2958.54	2026.13	4549.52	4529.47	2717.07	3374.72	5119.59	7664.93	7708.33	9990.92	6787.9	6758.68	6283.78	8734.84	3039.19	3987.63	3274.09	5796.7	6424.8	4573.78	6030.08	4125.22	5640.48	5859.5	2560.13	6904.32	4230.86	5919.1	6133.84	9040.16	5979.42	10650.7	6261.22	41.0159
6161	RPL32	NM_000994 /// NM_001007073 /// NM_001007074	17552.5	17178.4	14844.1	33294.9	13913.7	20641.7	15210.1	23069.1	21313.5	25966.6	16409.2	5606.63	5465.65	8902.57	8725.25	6590.43	7441.15	11250	18111.6	16592.7	24592.9	17710.4	15299.7	16851	20504.3	8287.64	8904.57	8366.86	15755.9	17612.3	21225.7	18530.9	8123.93	15321.5	13202.2	8417.02	15596.1	11629.5	12645.1	25442.8	20870.6	13933.1	25063.9	15627.2	40.4034
6164	RPL34	NM_000995 /// NM_033625	18084.2	6806.65	13650	15983.8	11700.8	18985.3	15932.2	18258.8	21539	26747.1	12606.4	6632.86	6855.77	10161.9	9642.52	6165.14	6633.92	14934.2	21914.3	16855.4	18654.2	24116.3	19424.8	10222.9	16052.3	6386.41	8798.87	7298.01	13426.2	16627.5	12374.3	9059.16	7517.51	11465.8	14366	5418.66	12456.6	6341.66	10748.9	7117.54	21050.3	15337.7	26044.9	13497.6	43.3078
6165	RPL35A	NM_000996	2264.07	1701.99	1562.65	5447.57	4805.59	3848.14	1810.79	3911.45	6057.44	8593.59	1976.6	588.615	721.016	1032.16	1030.79	647.785	796.941	1492.69	3471.51	3438.17	2838.62	2916.6	2581.84	2153.54	2050.39	1165.06	1211.51	1131.03	1935.09	2252	2090.86	1157.47	999.807	1580.9	3073.99	1133.64	2876.77	1128.17	2414.12	2357.68	3137.09	3372.09	5680.91	2475.32	67.4584
6166	RPL36AL	NM_001001	4141.63	2586.65	2026.28	4526.21	7189.28	5851.91	3145.69	5358.85	7279.69	12434	3728.35	1058.37	1294.49	1659.37	2052.62	1298.16	1212.6	2249.29	2916.41	4300.69	4285.01	5150.95	4392.47	4049.1	3794.88	1483.09	1497.83	2418.35	2908.19	3640.25	2392.77	2662.67	1743.55	2522.43	3571.27	1353.45	4338.34	1139.15	4139.58	5202.35	3779.52	3121.3	4461.62	3496.71	60.1401
6167	RPL37	NM_000997	15707.2	11528.9	8860.92	28088.9	22230.5	17390.8	10284.7	19162.4	17615.4	24901.6	11847.4	4759.9	3630.01	5580.65	7615.44	4618.41	5289.72	11075.1	15260	15799.6	17101.4	21341.5	15092.9	13870.9	12490.6	5731.71	6638.04	8827.01	10867.3	12012.5	14286.3	17185.7	7190.83	9993.01	15018.2	5259.9	12362.4	5741.8	13347.4	24810.3	15620.1	12610.2	23954.7	13083.8	47.2901
6168	RPL37A	NM_000998	11748.1	12936.9	9903	23030.9	14420.4	11679	8877.27	12713.3	13594.9	17449.8	8859.09	4273.68	5396.1	6966.39	7401.25	3873.91	5401.34	11159.6	14726.1	10842	15154.8	15466.6	13354	7930.67	14442.2	4792.44	6897.45	6452.54	9242.95	7519.24	11001.1	15961.9	7365.44	8632.47	11058.5	5726.18	11134.5	5077.92	9202.81	12611.4	13957.2	10243.8	18734.6	10632.9	39.8876
6169	RPL38	NM_000999 /// NM_001035258	13386.7	14234.4	10456.9	18744.6	13340	18117.8	14379.9	21175.9	21118.1	26092.1	13794.6	6591.4	6995.7	10479.9	9134.33	6688.39	8789.17	11555.8	15624.9	14563.9	23070.6	14726.4	12214	15003.5	16243.4	8343.49	8360.88	10647.2	14042.5	16260	20696.5	12197.4	6746.49	11617	11505.4	9417.24	16941.1	10050.1	11620.1	24325.6	17386.4	11845.3	17881.2	13869.9	35.2469
6170	RPL39	NM_001000	20149.6	14743.2	14056.4	34972	24976.7	22077.3	19862.2	23694.3	22724.3	27345.5	16118.3	6221.05	4929.27	7870.08	9996.47	6487.41	6915.55	13232	23325.7	16538.1	27296.6	31752.1	18669.8	17916.6	22144.8	9430.25	9833.44	10933	18748.2	17815.5	22656.9	22471.7	12004.2	14119.5	16883.2	5252.09	17182.1	10286.9	16871.4	28067.5	31438.8	16937.1	27424.6	17729.6	43.4166
6171	RPL41	NM_001035267 /// NM_021104	23677.4	33641.8	24698.6	50452.5	26004	31752.5	25994.2	31281.7	26539.4	31661.9	25308.3	10153.3	9051.16	15046.3	13308.5	10869.6	12254.9	18258.9	30005	20943.4	42248.9	38085.3	20706.5	24015.1	26931.6	12731.6	17314.9	16599.6	30582.1	23232.1	29724.7	35064.3	16457.1	28904.9	19410.5	10064.6	24468.2	20648.4	20690.8	36290.8	35352	21011.3	33873.4	24542.1	37.9764
6173	RPL36A	NM_021029	12410.8	4827.01	7716.1	7537.65	7043.17	13530.5	9874.68	13364.8	18565.2	28212	12838	3390.31	3031.01	5592.92	4780.36	3907.56	4525.69	6343.53	12572.1	17593.2	17869.3	12466.8	9791.58	13692.4	9554.96	5210.53	5569.76	6027.41	9110.8	13416	9456	7185.26	6227.99	8011.19	12067.7	2685.37	11312.8	5746.39	8363.61	8507.02	15961.3	11683.8	19544.8	9933.01	52.9999
6175	RPLP0	NM_001002 /// NM_053275	14853.1	17397.3	16558	29958.5	21750.2	19292.7	10412.7	18137.1	18395.7	23970.9	20777.6	4315.93	3778.64	5684.18	5286.7	4783.22	5431.09	5591.74	20455.9	18105.8	37224.3	17683.3	11791.9	19940.8	19919.5	9020.92	9483.02	15387.4	19064.6	16194.8	19833.8	20663.9	14486.8	18734.8	15089.4	6978.2	19567.9	13222	16834.2	23167.4	23847.7	15787.1	25905.8	16157.4	44.8949
6176	RPLP1	NM_001003 /// NM_213725	16554.1	17695	16601.5	28734.8	22675.9	22164.7	16099.4	23067.3	21405.5	28095.6	18051.5	5834.99	4563.05	6621.98	7658.14	6029.76	5981.81	11097.5	17023.8	17517.2	26338.1	26206.5	16201.9	16827.6	16942.9	10183	8937.44	12504.3	16873.7	15683.3	24956.1	11386	9479.69	15462.9	17765.2	6590.96	15697	9995.22	16483.9	32897.3	32925.2	15839.8	28119.8	16692.4	45.0672
6181	RPLP2	NM_001004	20059.2	10220.9	10238.6	19035.9	17077.3	15866.4	13112.8	23443.6	24801.1	32548.4	14264.9	2988.17	3330.36	4783.86	4971.93	3256.04	3971.25	6577.08	12926.3	17907	15628.4	17611.3	11974.1	14554.7	8837.6	5766.91	5896.03	7188.34	11516.3	17362.3	12657.4	5346	7124.92	13088.5	13670.2	5873.61	16936.3	7899.09	13648.9	32471.8	17476.9	13150.7	24610.3	13062.1	56.0719
6184	RPN1	NM_002950	798.686	892.013	203.435	479.717	1178.56	898.478	1544.36	748.454	661.697	690.188	1325.32	304.474	320.326	411.766	657.873	563.826	284.618	674.539	756.845	2234.45	760.713	1291.5	2796.51	1255.67	147.468	553.784	751.989	1800.93	899.378	609.219	239.813	370.87	803.781	1108.41	724.044	756.714	700.259	724.117	796.601	813.171	937.664	1567.94	757.597	855.762	61.3962
6185	RPN2	NM_001135771 /// NM_002951	2148.9	3551.98	2280.11	2567.52	6153.51	3939.08	1773.82	2578.7	3056.91	4110.75	5599.78	896.804	756.212	1059.73	1217.43	1174.51	825.1	967.873	3010.65	4673.49	3039	2769.38	5416.65	2841.52	4026.8	1618.36	2740.56	3054.26	2988.38	2548.18	1266.95	2254.27	7439.62	3798.26	2174.68	2817.84	2494.74	2842.48	3832.82	1865.07	3264.91	3513.17	2697.93	2875.55	50.7454
6187	RPS2	NM_002952	8764.45	13232.5	10568.7	21797.8	17337.8	17812.7	11134.6	17938.7	16829.6	18371.5	13229.6	3568.91	2245.43	3959.25	3672.28	3315.6	3702.95	4350.95	11060	13921.2	17949.9	12056.7	9874.61	15214.6	9372.36	6040.5	5097.42	8856.2	10453.3	13248.6	11415.3	9993.39	8027.39	11018.2	11679.7	4432.33	12574	9183.05	12893.8	18182.1	15742.8	11464.3	18373.5	11161.8	45.5565
6188	RPS3	NM_001005	9373.38	9192.6	11463.9	20646.2	22445.6	14644.5	16725.6	19939.6	21766.1	28138.6	14375.4	3216.2	4725.51	4814.62	3541.34	3148.44	3580.75	4925.96	19544.3	16803.6	17746.7	14069.9	10147.7	15106.4	15085.9	5290.54	5335.51	6457.66	13868.9	14478.9	8808.84	13371	8106.6	12168.3	12479.8	4572.04	16409.7	7492.29	14137.2	24914	17063.1	13780.1	21696.8	12688.4	51.1804
6189	RPS3A	NM_001006	22296.3	23065.4	21707.9	47056.6	27658.7	29558.8	20203.5	25798	26302.4	32181.8	22124.8	8960.67	9052.87	12367.6	11313.7	8181.78	9814.35	14117.3	21222.9	21321.7	29941	26205.8	20654.7	19612.7	23951.3	11148.1	12845.7	11453.2	20851.3	20330.2	24544.1	22799.3	14941.2	19090.7	18062.7	9497.43	18848	13542.4	18690.9	25278.1	26771.1	19009.7	30234	20293.3	38.2383
6191	RPS4X	NM_001007	17329.3	17891.3	12738.5	34006.2	22254.6	20492.6	11758.4	20823.7	19656.1	24860	17660.3	6078.99	6061.24	7887.78	8093.01	6584.74	6861.06	10407.2	24161.9	16438.6	24964.7	22775	18446	16548.7	21257.8	7580.53	9902.66	8269.44	15976.7	14842.7	15461	23364.7	10348.1	15879.4	16659.2	4724.9	16647.4	12160.7	15941.4	28201.3	29099.8	16582.6	26781.6	16382.8	43.3717
6193	RPS5	NM_001009	7147.67	6770.89	4368.35	13155.6	10615.8	7620.89	7585.55	10174.4	11889.9	15604.3	9893.59	2282.56	2291.3	3218.64	3555.28	2591.61	2883.95	4712.46	7759.14	12583.7	14148.6	8885.88	8458.74	12498.8	8612.95	4704.02	4187.28	7396.46	6888.32	8542.26	9710.8	4051.82	4336.98	6249.68	9492.8	3443.23	7793.62	4627.03	7451.47	13523	6329.61	8313.97	16770	7747.04	48.3637
6194	RPS6	NM_001010	14513.7	11178	15060.4	26410.2	21696.4	16862	14511.2	20422.5	23064.5	28939.1	18743.7	5895.2	5375.89	6883.5	7036.45	6317.77	5748.5	11401.2	17125.2	17962.7	23219.9	15762.9	16896.8	17854.3	18301.1	7635.49	9664.87	9374.36	13089.8	18120.6	13040.9	19458.8	9310.36	14780.4	15476.3	8607.34	14843.1	10655.6	16482.6	22289	20289.3	15211.9	21018.4	15035.6	38.9779
6201	RPS7	NM_001011	9899.5	6241.85	8966.41	15158.2	12236.3	12405	8864.68	11388.9	15122.2	18511.2	8812.74	2768.49	3581.95	4760.6	5012.85	2895.54	3426.16	6094.96	10704.4	13413.4	13399.6	11221.8	10683.2	9748.08	9130.99	3987.85	5467.72	5745.85	7452.8	9149.86	7401.29	7000.25	6258.62	6982.84	10040.9	4641.14	7447.25	4918.04	8653.19	7679.96	10131.7	10201.5	14697.7	8658.31	42.5838
6202	RPS8	NM_001012	7896.18	9603.64	6235.63	16793.3	15565.4	11261.4	5943.25	10982.3	16262.8	20391.9	8950.9	2350.62	2574.17	3279.16	3598.79	2812.35	2808.21	5009.04	10995.4	11770.5	12426.9	8491.51	9014.62	9289.82	11408	3852.19	4119.65	5525.89	6348.72	9081.99	7000.63	3244.93	5331.82	6837.47	9802.45	2713.28	7668.6	3762.81	10767.3	13271.2	15268.7	9876.49	13514	8458.23	53.0838
6203	RPS9	NM_001013	5552.33	5067.38	4601.11	12359.6	18735.7	10378.8	7903.59	10073.2	9971.15	15956.8	7137.02	1966.06	1732.42	2532.57	2504.2	1947.46	2259.06	3661.99	10846.6	12455.6	9402.94	6887.7	6992.08	9936.39	6651.87	3099.29	3856.18	6592.56	7056.87	6612.13	4531.38	6449.65	2304.6	6379.96	9079.86	2669.4	10130	4659.7	9873.05	8850.45	6829.78	7415.73	13061.5	7138.74	54.7109
6204	RPS10	NM_001014	16776.5	17965.1	18398.3	32824.9	21091.8	25828.5	18573.4	25426.1	27016.6	33090.8	21652.8	9670.59	8837.65	12142.3	10256.1	9592.62	10123.3	13038.5	23424.8	19669.5	38383.9	22237	13536.5	21551.7	22575	12479.7	13338.7	16308.1	21189.1	23297.8	22556.3	17318.4	12710.7	22542.5	16781.9	11265.3	26219.6	14397.1	18950.3	31485.7	29799.8	17839.7	29283.2	19801.1	36.5058
6205	RPS11	NM_001015	20128.7	20040	14212.8	36207.8	25089.8	25034.5	20773.4	27763.9	21008.4	29014.6	20894	6355.7	7640.25	8315.8	10177.5	6124.06	8182.67	12566.4	18351.6	19958.3	22749.4	23765.8	16503.7	18415.5	18659.7	9501.84	12661.4	12916.4	18121	19847.5	21978.7	14103.4	10313.7	17725.7	17842.7	9079.54	21581.7	15891.5	18682	40643	20033.1	18042.2	29555.3	18289.6	41.2256
6206	RPS12	NM_001016	17744.3	16422.8	12736	37941.1	22104.3	21449.9	18799.1	24545.8	21990	31213.4	18058.5	5413.01	4977.76	7192.87	6919.01	5805.96	6036.46	10645.4	22913.7	17504.7	28595	17150.8	13445.1	18813.5	21048.1	7532.99	8735.24	9352.91	18532.2	18375.9	15344.6	19207.4	11117.6	16868.6	15311	7284.49	19304.1	9637.29	16271.6	36374.2	24287.3	14470.8	24837.9	16798	47.4729
6207	RPS13	NM_001017	17372	10199.8	12093.7	19504.5	17954.8	16571.4	12714.4	19426.4	19033.8	24425.3	14161	5052.73	5694.95	6704.04	7453.65	5361.29	6395.53	10787.5	14354.6	16391	20842.7	19840.7	14550.2	14112.2	17031.1	8840.55	8919.73	10062	13058.4	14379.7	20165.5	16345.1	11199.1	11863.4	14332.5	7572.51	14305.9	8023.16	12789.2	25793.1	22191.6	13204.2	22861.2	14045	38.3761
6208	RPS14	NM_001025070 /// NM_001025071 /// NM_005617	20420.1	13028.7	15681.2	16999.5	16245	18763.3	17226.4	23127.1	22491.1	27735.8	19178.8	6556.17	5614.27	8207.65	8932.32	6568.73	7255.67	11247.5	16964.9	18082.2	27798.4	21044.4	19792.3	19095.7	15810.7	10037.3	9983.14	13745.8	16705.5	16767	20018.9	9885.42	12041.3	15727.2	15914	7051.43	16068.6	10745.4	12720.3	27191.1	23046.4	15447.2	25298	15866.6	37.61
6209	RPS15	NM_001018	13304.7	18516.4	12577.4	37677.6	22627.4	23067.6	14866.1	20651.7	20359.6	22506.4	18254.3	8151.01	9025.9	10235.7	9986.37	7564.53	9169.32	12790.3	15458.1	16237.4	27141.8	17598.8	14002.1	18712.6	20565.2	8384.14	10313.8	11343.5	15263.2	16842.8	17656.3	18804.3	9098.67	17180.9	14150.1	7581.67	15938.5	12492.6	15079.4	30189.6	15720.6	12334.9	23939	16124.7	39.2577
6210	RPS15A	NM_001019 /// NM_001030009	14760.8	7064.63	12318.2	21983.5	14315.8	15411.3	17981	18904.8	19203.9	23417.1	14436	3639.95	4358.76	4983.22	4643.31	3464.26	4270.36	5836.48	14171.1	14991.2	21285.3	18897.2	13073.2	13853.2	14144.4	6700.07	7125.48	7423.4	12839.2	14232.4	20537.9	9127.15	7740.47	13720.7	12797.5	5298.1	14195.3	7656.39	10862.9	17447.4	14519.5	12418.3	23457	12546.7	45.7709
6217	RPS16	NM_001020	11082.4	11546.8	9700.43	24098.2	17900.1	16608.4	11824.5	16183.6	17810	23804.4	11760.9	3989.81	3595.14	4233.99	4674.39	3507.19	4147.06	6307.05	11077.8	14347.7	17295.3	12864.2	8491.09	12093	13618.8	6499.08	6473.92	8839.47	10107.4	11575.7	13082.2	9941.71	7028.92	10025.6	10651	4062.94	14092.2	7721.11	11360.1	16863.6	14510.9	10354.8	17479.5	11238	45.5125
6218	RPS17	NM_001021	14677.8	10995.3	13180.7	24555.4	14924.2	16862.8	11978.9	16893.4	19288.2	22894.3	17495.9	4547.76	3814.56	6265.97	6253.12	4380.77	5275.18	7727.17	13291.5	16079.5	27082.5	16794.5	12620.4	16624.8	13580.8	6948.85	9105.86	8283.87	15404.3	16593.3	11808.2	13221.5	8841.31	13799.3	12603.6	4606.29	14979.5	8684.89	12863.6	12134	21427	12840	23091.8	13147	43.2067
6222	RPS18	NM_022551	20117.3	24314.1	20573.5	43005.4	19241.5	26487.2	17369.8	23964	22948.3	26813.2	21481.1	8343.88	7964.6	10869.5	9568.06	7729	9135.02	13704.7	22690.3	18010	37882.7	25839.8	18175.7	19877.1	22657.8	10857.3	13331.5	13351.9	21781.6	20286.9	22322.1	21362.5	13723.2	22879.9	17352.3	10143.5	22030.2	16707.8	17656.3	19762.4	30267.1	17477.2	32462.6	19593.5	38.9213
6223	RPS19	NM_001022	8260.52	12291.9	11908.4	36325.8	23717.3	17786	11937.3	20244.9	21308.5	30567	14639.7	3871.75	3218.28	5014.97	5697.77	3764.63	4491.12	7000.83	17758.4	17930.7	25940.8	14026	9589.71	18997.3	19791.2	5066.4	5660.34	8386.98	12480.8	15501.9	9508.33	12692.2	7045.27	12283.7	14498.5	4702.76	18279.4	8235.47	15862.2	17206.3	11108.3	13107.2	22681	13497.4	55.6076
6224	RPS20	NM_001023 /// NM_001146227	23244.4	13802.5	12422.1	28624.7	19486.9	17097.9	13446.9	19377.5	19967.2	26924.5	13833	5795.93	4184.27	7312.83	8531.37	5713.42	6088.86	11591.1	16932.9	17290.4	20121.6	21734.9	17195.4	12820.6	17420	8091.19	9247.95	10143.7	14856.3	15208	17688.7	14898.8	8982.23	12342.5	15764.4	9008.21	15138.3	9145.44	13820.4	17475	23666.9	13904.5	24530.3	14764.5	39.7954
6228	RPS23	NM_001025	23785.6	21053.1	18113.4	50785.1	28315.5	29458.4	20518.6	29853.6	28580.6	34542.3	21905.3	7645.52	7519.53	12137	10925.9	8407.05	8810.19	15128.2	26224	23167.6	28827.9	28481.9	19796.3	20565.9	24598.3	10477.7	11944.7	11426.2	18865.7	21980.3	26643.6	21401.6	15435.8	16179.3	19165.1	7857.69	19793.3	9885.93	20579.7	32594.4	35743.8	18388.8	35899	21009.5	44.3847
6229	RPS24	NM_001026 /// NM_001142282 /// NM_001142283 /// NM_001142284 /// NM_001142285 /// NM_033022	16433.9	7940.95	12669.8	11055.1	15388.6	16512.2	14268.3	16997.5	17246.8	21752.4	14257.4	6675.37	6945.04	9884.61	9435.25	6988.76	7615.33	13690.5	14180.2	16865.7	23533.5	22521.8	16752.4	13519	14555.9	8358.21	9457.91	8391.19	14608.2	14533.4	19055	12432.2	9322.36	15262.7	14005.6	7797.11	9429.87	10020.7	12263	11920.5	25956.9	14934.4	24689.3	13723.8	36.0069
6230	RPS25	NM_001028	10649.5	5581.41	4415.26	11766.9	13556.2	7566.35	5169.2	10362	12670.5	16559.2	6222.56	2731.51	2325.31	3760.26	5676.98	2983.21	3085.18	8137.55	9264.07	10359.4	6881.19	9802.51	7532.14	7262.62	8311.9	4157.96	4376.39	4939.43	5323.49	6610.34	10349.6	7227	3940	3951.21	8780.56	3545.19	7042.53	3415.63	7992.48	11993.6	8898.63	7172.96	12970.8	7333.04	46.0411
6231	RPS26	NM_001029	6666.61	9740.18	3052.18	8419.59	7261.73	6123.81	5044.42	8284.63	8454.52	14931.1	5382.09	2151.98	2074.78	2881.83	3472.03	2208.2	2275.47	4461.55	4536.91	7858.63	8310.03	12357	4603.58	8890.57	2463.37	3275.72	4071.2	6450.7	4967.11	7625.33	5295.53	5650.79	3467.41	5845.88	7785.53	2086.17	6643.37	3933.61	5835.41	8277.41	9312.03	5943.86	11210.5	6036.85	48.6698
6232	RPS27	NM_001030	21047.6	7380.35	15632.9	24771.8	13889.8	16014.2	19875.4	25560.7	24086.5	29538	17462.9	9458.58	5742.96	8347.65	10256	8272.67	7685.72	16542.5	17741.3	17139.3	21508.7	29168.4	17902.9	15066.1	16756	9364.77	12779.3	10792	18885.3	20305.7	19312.8	21195	12352.2	16951.3	16619.2	10869.3	18984.2	12638.9	14436	27514.5	29185.1	16184.5	29981.8	17097.7	38.0803
6233	RPS27A	NM_001135592 /// NM_002954	16210.1	5268.56	7259.53	13602.1	16718.2	10220.5	9595.96	15419	18737	24506.2	10739.1	5004.24	4972.7	6535.31	9205.59	4830.8	5556.53	12399.1	13293.6	16040.2	13283.7	20484.4	14090	11573.3	8654.59	6270.66	8615.56	7752.53	10583.2	13625	8770.72	9227.62	6950.12	9411.88	13130.9	5398.59	8537.8	6991.54	12237.8	15409.6	21401	12870.4	21641.4	11465.7	43.6396
6234	RPS28	NM_001031	1662.76	2281.32	1932.41	4535	5138.08	3097.21	3048.11	3366.66	4509.09	4769.67	2437.77	1408.42	2369.02	2359.81	1807.06	1626.9	1547.07	2023.62	3876.58	3125.35	4544.96	1917.86	2905.24	2268.11	2534.68	1295.18	1135.94	1376.89	2461.18	2638.66	2292.5	1877.15	984.54	2334.58	2690	689.695	1958.22	1497.98	2089.9	3773.34	2375.21	2278.86	3591.9	2521.73	42.565
6235	RPS29	NM_001030001 /// NM_001032	15436.1	15342.5	11657	45684.5	24055.5	19779.5	16296.7	25073.2	25398.2	32074.7	17470	4293.66	4606.07	7293.57	7191.25	5312.21	6124.69	9548.73	19572.2	16649.4	26034.5	21741.8	16110.2	17780.3	21964.4	7110.35	8842.28	11420.8	16739.9	19482.2	20690.3	17904.9	10408	12571.1	14413.6	7875.06	20769.8	9195.48	18135.6	23346.1	16473.6	12960	21770.3	16339.5	49.4047
6240	RRM1	NM_001033	654.238	472.25	443.51	428.294	279.071	236.182	203.396	406.055	781.267	828.668	763.593	292.204	399.265	389.924	280.356	301.991	332.694	331.289	585.485	917.871	1201.7	408.187	380.158	668.81	1581.13	337.051	256.746	361.489	473.305	409.203	445.925	471.054	589.732	442.729	1121.48	521.858	875.863	264.222	681.076	309.584	637.318	584.244	1019.56	543.489	53.9035
6249	CLIP1	NM_002956 /// NM_198240	659.736	311.911	268.829	186.18	723.905	352.961	533.671	457.547	522.029	379.047	227.796	394.583	811.967	507.906	747.829	473.638	454.127	472.325	468.236	481.994	898.991	571.453	877.907	681.975	1162.09	464.789	327.357	248.703	340.476	222.749	1531.54	365.817	1168.73	357.139	932.5	164.181	310.893	407.424	432.113	302.05	587.859	413.234	810.23	535.266	54.1027
6277	S100A6	NM_014624	9093.74	2468.3	11147.6	517.845	3916.6	12870.5	14120.6	6898.11	3312.05	4009.33	2978.66	550.922	842.439	689.882	1238.36	1486.98	760.067	2350.64	3438.95	14643.4	7214.61	24021	2139.76	11811.2	4619.54	2738.75	4674.73	233.982	15467.8	2983.36	1845.09	1563.29	4391.31	3905.01	6491.07	626.915	1291.98	3608.9	2260.72	7920.87	6927.14	5695.38	8832.1	5316.27	96.064
6293	VPS52	NM_022553	600.245	1010.41	323.357	744.97	637.798	577.914	519.69	539.733	1008.39	647.906	347.558	713.337	748.575	934.763	906.362	716.023	621.158	854.238	726.826	416.267	1100.03	948.838	668.457	1409.69	990.912	468.236	580.743	599.524	445.014	587.717	476.624	467.691	530.032	325.628	731.949	679.177	227.053	339.793	731.37	459.877	763.409	753.203	915.703	669.679	35.9038
6301	SARS	NM_006513	1260.14	1343.38	1015	1075.94	1561.25	1431.55	1013.7	1093.81	1402.91	1708.9	1112.88	1157.24	1255.83	2141.57	1742.01	1548.18	1830.91	1725.34	1104.37	3045.17	2028.81	1494.55	1207.02	2124.37	1342.56	1403.1	1010.67	887.214	1450.41	1044.19	1138.02	1295.78	1451.03	1342.66	1426.29	1149.09	1420.94	1110.07	1020.68	895.087	1311.36	1197.15	1880.98	1400.05	29.1677
6302	TSPAN31	NM_005981	749.216	470.065	385.867	169.516	423.45	373.789	330.84	432.262	305.997	298.42	345.58	517.276	456.873	367.106	568.211	660.42	330.825	779.272	453.351	538.528	494.84	451.585	1072.48	798.666	318.184	466.09	500.396	668.518	592.753	430.97	374.887	327.799	617.167	340.971	515.568	160.548	167.348	500.935	396.721	275.343	551.172	599.237	695.151	471.493	38.519
6303	SAT1	NM_002970 /// NR_027783	4873.95	2055.66	2696.67	1484.22	9058.79	9224.65	13824.2	5154.59	3465.87	5844.37	4145.22	1138.19	393.142	950.569	2197.12	1002.46	937.122	2273.73	3013.57	4474.45	2894.97	5715.77	3736.26	4946.92	285.364	2030.19	3609.86	3893.7	6685.15	2358.7	279.839	4768.86	8701.77	3437.67	2167.54	1092.18	1815.5	2782.36	5093.87	8657.49	1677.05	5724.7	1409.29	3766.83	76.2787
6342	SCP2	NM_001007098 /// NM_001007099 /// NM_001007100 /// NM_001007250 /// NM_002979	2733.43	1019.45	911.4	1136.98	4276.52	1472.28	608.598	1156.48	1887.34	1595.6	772.828	529.124	342.598	584.777	1122.18	839.935	466.879	1363.51	1524.56	705.872	1753.27	3272.42	2174.58	1598.67	1368.53	1213.7	2013.47	4532.91	1093.2	801.755	1053.4	2308.33	701.958	998.52	2354.21	752.216	1456.46	751.019	2059.9	1096.87	1297.1	1387.62	2746.58	1484.58	62.8005
6386	SDCBP	NM_001007067 /// NM_001007068 /// NM_001007069 /// NM_001007070 /// NM_005625	6164.21	3515.95	2227.11	2381.47	6362.32	10627.5	17122.5	8695.07	4191.99	4931.36	2497.38	2559.94	1339.84	2590.34	4275.59	2245.63	2023.96	3651.15	2967.77	8897.95	1616.65	4058.15	3552.7	2265.35	1653.74	2995.77	2200.77	1736.23	3216.54	2538.22	1576.29	6268.13	4720.5	1254.32	4438.35	1130.41	3553.09	1647.69	3097.32	18490.6	2710.11	2749.35	4189.17	4207.64	87.7777
6389	SDHA	NM_004168	1068.32	1685.51	525.544	1185.84	1803.18	953.562	531.689	733.871	898.73	1059.62	692.071	607.189	907.377	1073.44	897.285	620.389	840.802	1067.27	650.901	1007.33	290.732	1435.75	402.677	812.605	355.621	2782.38	1210.94	1568.41	954.482	579.187	2931.24	292.921	706.576	791.973	589.381	806.367	941.347	473.911	789.352	775.534	413.22	714.314	769.506	934.846	58.8571
6390	SDHB	NM_003000	766.662	463.914	332.294	365.625	1035.4	812.105	925.151	631.162	487.329	629.721	402.705	284.889	323.859	518.108	515.071	287.231	352.842	541.512	337.473	515.39	490.231	1067.44	449.51	619.887	252.73	1024.37	841.831	1155.03	463.985	312.931	2308.18	204.041	416.801	385.565	444.769	608.3	480.788	255.437	543.109	690.811	443.366	444.048	737.205	585.321	61.2458
6391	SDHC	NM_001035511 /// NM_001035512 /// NM_001035513 /// NM_003001	1057.96	957.165	594.939	544.866	1220.13	960.08	577.776	687.377	444.652	416.642	571.579	466.849	454.133	532.438	493.884	524.576	422.423	567.591	585.422	535.336	1204.39	736.447	751.551	1824	513.382	913.681	1178.38	1567.64	833.277	494.62	1054.93	483.83	615.984	641.671	784.948	500.336	1036.06	422.507	775.445	305.53	326.281	762.56	745.159	722.987	44.9908
6392	SDHD	NM_003002	2147.5	623.618	624.874	783.656	1514.01	1235.31	1274.43	1066.68	1027.33	1725.09	723.465	558.904	353.616	537.043	958.143	593.397	508.472	981.489	634.616	940.191	1105.46	2795.13	1485.57	1245.67	843.567	1359.26	1657.59	2025.49	826.219	776.766	2806.87	873.079	909.649	631.412	1403.04	342.57	942.695	894.32	1184.85	872.682	907.996	1045.25	2128.06	1113.37	52.0098
6396	SEC13	NM_001136232 /// NM_183352 /// NR_024272 /// NR_024273	792.25	1116.23	415.297	592.222	2856.97	1708.19	1570.36	708.21	874.846	880.179	1232.54	357.38	188.014	605.566	523.179	406.95	263.387	528.823	768.339	2261.41	1011.43	974.791	792.344	1840.16	719.273	750.615	730.255	603.282	812.466	560.247	751.885	318.569	1284.56	1039.18	694.486	582.678	1915.61	588.619	1313.5	788.857	1057.35	1197.76	1090.3	931.827	58.4334
6415	SEPW1	NM_003009	2097.11	785.273	2054.37	261.174	1051.16	549.779	415.671	782.842	1585.92	1971.45	605.04	3626.61	3347.09	3989.39	4288.02	3067.8	3558.11	5339.17	1420.28	1048.48	1789.24	2573.29	1521.24	2376.79	887.192	4556.21	1028.08	447.694	3018.02	1280.19	7654.38	957.879	892.983	2727.57	2260.53	997.436	1065.32	1365.85	825.589	483.77	4704.66	1866.65	1794.95	2067.91	76.3438
6418	SET	NM_001122821 /// NM_003011	1815.55	1617.88	1786.02	3502.66	5046.52	2991.58	3201.86	2898.23	3362.25	3678.62	2713.44	1986.66	1994.63	2430.33	2556.84	1743.79	2035.97	2324.23	2800.93	4166.14	2663.77	2438.7	2242.46	2343.64	2354.63	1659.45	1671.1	1130.11	2360.95	2259.56	1922.31	1602.46	2000.06	1549.32	2567.51	973.603	4128.25	1829.59	3295.53	2944.06	3209.78	2422.18	3018.48	2493.99	33.5209
6421	SFPQ	NM_005066	740.446	496.983	489.292	971.594	2828.87	942.787	824.852	1397.87	2099.79	2378.24	1158.78	548.895	828.553	833.878	828.265	486.045	565.514	817.094	1481.38	1321.99	928.987	830.55	1539.76	405.186	851.572	582.707	526.401	377.054	619.245	655.49	356.204	848.871	828.023	615.696	1329.47	695.471	1108.18	312.019	1507.54	1539.02	943.755	1237.89	1114.44	971.968	55.0036
6426	SFRS1	NM_001078166 /// NM_006924	1124.23	833.887	666.702	1267.56	2419.2	1043.84	1338.54	1677.67	1469.85	683.121	1113.8	537.007	776.461	757.48	866.006	644.295	567.249	831.363	1366.87	1709.83	1257.07	1098.27	1555.1	843.622	836.793	773.546	708.843	710.106	671.227	1039.23	501.903	494.345	920.681	954.969	1163.77	638.116	1124.95	541.291	2056.15	651.868	727.017	1329.54	1333.49	1014.58	42.0758
6427	SFRS2	NM_003016	1216.52	2089.33	1807.59	3442.39	4689.84	3146.95	2417.48	2909.47	4243.75	5927.46	3407.93	851.032	1194.83	1396.97	989.893	854.556	939.403	1127.93	1888.9	2244.56	2731.79	1286.73	1390.36	1793.49	1729.96	873.75	1071.76	1013.69	1297.05	2004.79	1055.11	1173.48	1695.06	1842.75	1702.12	1523.75	2946.85	1326.52	2935.55	2567.55	1100.16	1870.94	1648.16	1985.31	56.0365
6428	SFRS3	NM_003017	884.79	987.385	425.828	932.792	2288.2	1014.76	587.529	1106.35	1427.55	1906.08	903.548	800.299	580.745	925.942	1222.01	948.457	719.945	1495.97	1055.29	1708.62	809.782	1011.47	1554.34	809.957	891.497	617.199	524.643	474.367	572.308	894.225	211.445	659.533	615.687	529.691	866.467	589.381	861.474	313.729	1137.55	949.716	1227.17	1257.02	1049.36	938.374	44.4296
6429	SFRS4	NM_005626	1692.16	817.947	777.051	1068.39	1650.89	1202.06	2040.48	1186.77	1787.86	1781.17	959.541	820.334	1021.61	908.609	904.387	940.804	710.383	921.273	951.304	1843.85	975.01	1207.21	1469.87	1064.58	1172.62	753.592	704.504	638.593	840	1102.79	809.538	352.297	1219.08	951.201	1059.98	598.566	1083.43	675.071	1132.86	1270.83	1533.46	1156.45	1224.67	1092.63	33.7683
6430	SFRS5	NM_001039465 /// NM_006925	1254.7	1163.15	1051.98	3181.02	5194.31	3306	5485.36	2669.17	3034.9	4057	2386.96	745.635	1326.34	1125.06	1587.16	739.821	813.819	1512.97	2702.43	1502.06	2714.7	1241.94	2381.1	1409.79	1349.37	1074.48	977.651	708.457	990.779	1766.91	666.78	1122.15	1656.81	1419.82	1821.59	912.522	1185.33	717.228	2020.33	1487.39	646.593	1320.16	1251.85	1760.08	64.5752
6431	SFRS6	NM_006275	471.692	593.966	413.685	1415.72	3154.42	1412.52	704.648	1136.13	1707.88	1635.44	1085.43	285.295	360.044	395.47	526.352	436.22	282.662	540.536	1300.39	1004.54	661.414	579.368	1215.38	621.029	729.068	380.442	364.259	459.476	589.546	600.322	278.054	536.43	417.826	528.281	945.242	487.626	791.444	368.48	1233.96	1170.72	671.76	917.3	955.672	799.212	66.5173
6432	SFRS7	NM_001031684	538.467	446.921	500.157	1250.19	1730.52	942.694	925.585	988.296	2330.69	3478.52	1250.05	389.276	402.33	497.541	487.551	265.944	339.789	423.488	683.785	902.677	835.337	377.62	1041.93	343.611	857.539	301.619	352.244	383.151	459.616	732.845	202.853	427.375	494.546	428.346	584.726	497.452	957.76	247.818	1210.28	516.453	518.898	733.591	769.924	745.349	79.9486
6434	TRA2B	NM_004593	799.305	985.57	538.175	1894.19	4865.56	1768.62	1047.27	1450.12	2807.77	3116.79	1724.38	422.785	553.18	693.232	771.646	451.082	512.605	723.315	1547.86	2009.12	1477.13	1062.08	1459.95	709.368	1202.12	417.963	471.732	444.696	693.239	766.151	429.094	973.157	1005.65	688.547	1332.76	809.701	1832.4	484.463	2393.18	1551.6	732.816	1212.52	1410.71	1214.97	71.1598
6446	SGK1	NM_001143676 /// NM_001143677 /// NM_001143678 /// NM_005627	1159.33	4794.17	1652.99	370.683	1993.33	6676.03	9080.32	2149.54	1017.86	1142.01	1105.87	1207.52	482.186	885.649	2590.77	1747.81	834.722	2188.24	2671.98	3492.36	9260.14	7015.93	2035.03	2890.51	3043.09	688.045	3152.51	873.368	1641.96	905.772	1819.39	3770.61	2017.83	1513.44	1805.61	1096.42	1800.38	402.916	4420.09	1648.22	854.554	3905.84	2057.42	2461.92	86.0433
6451	SH3BGRL	NM_003022	1929.78	945.933	812.292	2530.82	6744.62	4287.58	2951.29	2719.34	2434.44	1854.05	1379.61	940.743	158.713	1313.61	1695.42	1659.45	938.854	2394.1	2190.96	1022.11	955.223	1262.98	2644.24	990.891	1505.78	649.772	944.295	295.491	1019.77	1573.43	196.087	1148.25	567.251	1057.94	1924.7	616.488	2095.7	555.374	2672.76	6444.3	4985.02	1681.97	2005.19	1830.15	79.6492
6464	SHC1	NM_001130040 /// NM_001130041 /// NM_003029 /// NM_183001	1162.13	890.31	654.724	237.783	465.709	543.889	777.771	486.625	513.266	480.507	608.463	126.334	163.195	128.944	161.253	279.509	114.53	226.167	697.01	2172.78	614.159	766.049	924.521	640.559	185.412	553.549	330.132	500.863	514.321	925.675	249.92	467.492	1060.99	538.571	713.326	192.942	916.232	623.742	499.665	276.951	1401.67	1337.49	940.052	606.167	67.1953
6477	SIAH1	NM_001006610 /// NM_003031	585.41	206.752	292.214	242.075	709.05	180.511	605.899	333.184	508.465	482.622	383.02	341.406	473.502	504.654	472.909	416.263	445.865	308.04	627.491	768.891	542.189	311.717	741.768	274.771	799.235	379.699	229.811	194.122	299.345	325.082	358.82	417.015	1582.97	394.917	654.465	549.955	727.167	300.296	489.723	359.401	649.458	553.493	497.996	477.247	50.1199
6500	SKP1	NM_006930 /// NM_170679	3961.65	3904.96	1897.35	2964.65	4225.97	2695.7	2625.83	2743.65	3625.9	6577.61	1804.91	2805.33	3226.47	4752.08	5210.54	3501.73	3610.87	5296.24	3346.55	3358.42	3106.77	3536.83	4645.28	3935.89	3867.77	3156.64	2746.28	2123.84	2969.95	1689.02	4487.97	2725.87	3079.55	2212.98	2920.55	2758.62	2485.33	1829.88	2404.49	10650.1	3689.65	2938.15	2983.6	3467.01	43.4657
6558	SLC12A2	NM_001046	210.104	228.678	365.831	369.729	174.833	176.522	108.439	180.476	328.432	517.194	333.145	397.655	279.564	276.237	231.039	480.627	343.6	455.439	758.807	351.171	258.709	445.537	126.73	362.924	1020.51	322.592	314.68	316.908	414.898	259.123	417.878	516.945	120.747	523.204	592.816	1143.64	229.857	311.43	299.663	176.327	110.954	230.658	178.011	354.937	60.2183
6596	HLTF	NM_003071 /// NM_139048	727.166	925.339	379.223	619.298	436.79	125.753	152.668	441.743	397.669	353.333	659.829	812.739	1089.57	1022.12	1076.33	972.957	811.444	1067.73	576.614	494.06	385.938	345.169	639.977	237.697	628.736	791.899	541.887	382.016	446.445	454.036	583.223	362.905	378.505	583.132	449.779	1638.25	484.047	456.98	621.315	334.666	500.847	591.337	394.911	590.141	49.5655
6601	SMARCC2	NM_001130420 /// NM_003075 /// NM_139067	415.614	345.195	174.579	211.761	133.103	247.519	431.01	354.157	452.583	387.21	227.5	545.812	724.19	664.526	545.401	406.495	454.214	603.882	375.001	219.122	196.936	403.088	434.958	229.91	166.352	233.919	245.215	165.185	189.095	350.207	211.288	101.353	218.545	241.63	378.454	231.426	251.2	247.101	205.058	272.042	472.391	406.775	515.484	332.244	44.7281
6605	SMARCE1	NM_003079	1164.85	682.701	378.169	1331.16	1993.01	1067.79	606.213	1112.98	1414.24	1470.97	718.984	272.005	343.674	523.836	474.951	274.839	276.156	643.413	1011.36	1266.86	909.549	844.826	1078.82	628.502	921.738	470.633	438.188	335.995	631.971	724.267	413.749	567.525	648.751	694.334	1030.03	454.869	1395.4	279.056	1250.96	947.019	910.126	1324.46	1371.91	820.95	49.9343
6612	SUMO3	NM_006936	1068.7	629.695	467.349	742.823	3275.49	1927.34	537.713	920.047	1467.3	1031.1	1179.44	1060.43	998.155	1347.63	1249.4	1045.2	1011.24	1023.43	1018.87	1362.63	860.102	721.393	1090.25	1436.97	1020.03	881.636	526.375	787.861	647.484	891.935	756.015	779.977	798.117	517.852	1245.98	763.555	1342.68	620.232	1715.87	791.837	576.196	889.882	1165.83	1027.72	46.373
6613	SUMO2	NM_001005849 /// NM_006937	4275.45	3752.14	2675.13	3179.1	5956.03	5245.67	4713.48	5036.28	5548.78	9129.03	3478.46	2604.08	3683.77	3666.19	4217.9	2693.78	2768.5	3768.64	4501.12	5703.39	5870.94	4977.04	5737.69	5110.92	5332.38	2427.3	2576.76	2436.61	3686.47	3283.45	3089.54	3008.38	3007.94	2911.02	4398.06	3694.07	4963.67	2230.66	4539.91	5287.78	6228.37	4977.76	6044.44	4242.28	33.1373
6625	SNRNP70	NM_003089	228.445	581.473	250.026	364.993	419.473	243.719	521.148	297.651	540.957	345.803	380.68	398.524	1273.31	331.163	282.887	312.29	355.938	272.646	582.681	268.551	272.57	167.278	184.232	173.255	218.593	315.813	282.3	166.345	347.834	738.789	224.312	223.022	316.306	462.713	316.166	270.123	411.457	450.07	506.48	184.239	293.616	528.772	171.52	359.957	53.881
6628	SNRPB	NM_003091 /// NM_198216	762.968	1360.33	739.517	1294.63	4470.8	1638.65	1705.3	1500.63	2417.82	2527.22	1786.45	256.385	753.577	646.166	428.523	378.443	442.061	473.272	935.491	2538.38	1591.27	1068.56	1049.43	2017.52	695.405	664.056	772.261	975.454	1095.75	1439.9	777.124	669.091	1114.31	1043.06	1225.64	1278.27	1554.85	1119.23	2662.6	1593.17	1210.99	1366.67	1368.67	1288.6	60.1619
6629	SNRPB2	NM_003092 /// NM_198220	1460.79	566.614	719.32	974.387	3164.76	2074.34	783.856	1375.11	2451.19	4131.2	1169.02	891.24	540.696	900.516	963.449	849.266	678.423	1073.8	1061.74	1583.9	1095.35	1102.98	1383.52	902.856	1064.83	980.761	904.351	477.705	1057.53	1054.9	972.304	582.419	948.927	689.01	1224.83	836.435	1655.02	285.03	1976.23	864.72	1889.66	1348.71	969	1201.88	58.9045
6632	SNRPD1	NM_006938	360.509	336.414	351.619	506.002	951.6	451.269	145.651	389.145	719.508	1859.13	599.226	217.068	251.991	451.638	426.709	267.303	281.736	429.874	423.653	786.834	583.783	501.054	392.109	586.974	314.042	175.915	182.419	270.384	526.291	299.914	294.426	219.521	395.287	239.846	416.367	411.438	922.321	108.898	660.92	224.927	306.255	598.885	592.352	451.888	65.0174
6633	SNRPD2	NM_004597 /// NM_177542	3282.28	2885.9	2072.24	3744.83	2941.09	2887.41	1777.81	3669.92	6015.48	11934.3	3309.31	1705.53	999.842	2467.36	2584.08	1661.01	1959.27	2723.64	2771.44	4973.36	5267	3629.48	3583.63	4820.77	3298.54	1983.12	1931.67	1748.14	3246.01	3054.7	3084.76	1298.14	1838.59	2289.07	3285.18	3009.24	3145.55	1450.87	2677.74	1996.03	2878.44	3862.58	5961.35	3155.97	56.9025
6635	SNRPE	NM_003094	2077.14	1862.88	1346.41	2584.96	5749.19	2147.92	857.458	2117.31	3341.75	5604.38	2106.19	759.249	888.503	1338.79	1188.42	949.201	971.353	1479.65	2796.83	3503.11	2183.47	2178.11	2055.39	1796.51	2223.06	978.858	1360.76	1631.68	1772.42	1364.58	1690.41	1565.29	1202.93	1255.04	2442.67	1162.21	5280.02	787.831	3499.15	1390.26	1876.9	2405.45	2548.53	2054.01	58.1756
6636	SNRPF	NM_003095	469.938	473.199	527.593	562.741	703.593	722.274	418.637	823.28	1009.73	2650.69	1207.57	284.303	377.689	459.65	426.38	340.024	332.397	493.959	552.209	631.493	973.736	825.495	740.125	1105.31	530.971	363.364	390.293	965.273	715.424	742.084	462.924	359.267	372.207	628.077	579.644	662.076	1349.89	472.273	777.127	594.134	552.928	962.805	654.855	680.177	58.2118
6637	SNRPG	NM_003096	1995.94	1949.53	1117.52	2747.02	4793.69	2202.2	1408.91	1671.82	3003.41	6345.62	1614.83	476.028	458.638	769.067	1005.31	535.112	620.924	1226.25	1912.74	3464.02	2696.86	3345.34	2305.48	1592.96	2161.51	1038.93	1289.5	1340.23	1865.38	1016.4	1691.16	2402.75	1716.15	1046.4	1997.65	1357.6	4228.25	706.713	3555.46	1104.87	1843.07	2130.27	3489.96	1982.36	61.7227
6643	SNX2	NM_003100	827.589	204.103	278.457	1755.35	2048.19	1411.17	1033.45	891.543	501.813	814.993	492.978	226.577	229.673	325.308	398.159	297.829	226.649	406.461	311.723	571.793	431.786	413.353	690.612	417.524	281.354	284.508	350.587	343.009	535.809	633.328	320.542	214.059	659.714	320.596	653.123	298.937	278.265	320.952	812.022	917.876	418.49	454.307	486.773	553.287	71.8036
6647	SOD1	NM_000454	8159.33	12684.5	2802.26	3252.72	7236.9	2732.74	1567.52	3127.67	6397.2	10257.7	3233.86	5780.55	3851.92	7624.49	8666.74	6276.03	6465.49	10397.9	4195.23	5354.4	6417.59	7069.68	4984.13	5446.16	3552.1	5930.63	6984.52	13489.6	6199.61	3477.01	6015.38	3801.28	6190.9	4223.52	4180.25	3136.56	6681.84	2969.31	3952.86	11245.4	4335.07	3972.06	4352.71	5783.1	47.0893
6651	SON	NM_032195 /// NM_138927	1104.2	650.379	626.605	2247.64	2364.33	1556.72	2257.37	1492.3	1873.84	2235.11	1183.46	552.176	700.422	744.05	928.978	575.077	534.031	1040.66	1077.04	1507.19	866.52	909.291	1137.05	527.804	1514.31	640.323	668.668	426.879	713.773	1122.05	507.804	828.42	1182.14	882.167	1105.56	723.839	969.399	465.648	1501.54	1085.77	915.36	984.565	1141.88	1071.45	48.0371
6670	SP3	NM_001017371 /// NM_003111	1215.24	238.198	376.641	805.191	812.976	937.812	1530.33	1556.13	1490.66	892.002	678.577	383.935	461.675	564.472	867.779	512.703	378.767	745.325	1238.84	1227.66	749.578	1332.15	1703.3	550.596	2402.23	524.779	424.255	281.653	690.401	899.65	421.648	744.487	1260.83	503.312	1652.48	491.419	801.324	514.783	1024.19	1028.82	876.446	1254.61	1287.01	891.508	52.0931
6675	UAP1	NM_003115	1889.71	641.858	430.809	341.704	519.276	196.919	237.01	360.706	497.42	1142.56	960.606	218.464	293.697	517.898	631.356	377.989	330.641	507.044	779.295	3874.92	1055.43	2124.54	1431.93	1030.99	390.735	519.587	472.24	1035.89	1244.49	289.06	735.165	636.05	716.53	615.655	669.471	2166.39	494.833	177.768	589.649	142.942	740.332	706.488	808.178	780.098	87.203
6717	SRI	NM_003130 /// NM_198901	904.991	866.509	809.527	874.08	2448.93	977.29	709.734	736.17	960.297	901.718	723.35	1005.54	598.26	1326.75	1702.51	1342.1	1062.32	1814.04	845.455	1491.9	906.884	6664.82	1059.55	875.058	843.534	581.717	540.822	235.255	2014.95	604.754	321.037	924.243	953.84	701.723	695.807	358.741	1380.57	399.654	1019	731.207	617.806	975.87	853.248	1078.18	90.6
6726	SRP9	NM_001130440 /// NM_003133	4496.01	3571.55	1969.22	2482.76	6354.16	3756.5	2101.32	3192.22	3701.48	4149.37	2262.45	2634.79	2378.54	3586.86	4756.51	3481.18	2930.69	6703.54	3203.37	3670.93	2669.89	4595.49	5469.89	2622.66	3103.88	2849.89	2665.59	2892.52	2764.41	2162.27	3789.82	2120.78	2195.19	1855.47	4488.72	2261.34	4568.1	1720.88	3545.41	2218.96	3128.39	3652.03	4344.41	3327.2	34.6703
6727	SRP14	NM_003134	5757.74	7259.7	3463.11	5627.47	10857.6	6441.45	4876.59	4637.91	5440.9	10156.3	4047.01	3744.85	3121.86	4844.92	4817.26	4285.86	3798.61	5522.98	5187.95	6197.14	5653.36	4846.77	5699.53	5232.42	5840.24	3542.39	4422.31	3882.55	5093.29	3843.35	4803.9	4525.61	3785.53	4125.16	4057.82	3460.05	6742.65	3017.23	5896.4	5736.08	5717.95	5634.19	5667.04	5146.81	30.3947
6728	SRP19	NM_003135	1021.66	781.871	562.167	1335.18	1904.2	1453.35	1087.94	1206.89	1786.35	3427.16	1197.47	512.156	428.559	841.622	988.661	617.541	718.016	796.918	1091.65	1670.79	1294.49	837.43	1654.77	939.679	1473.09	626.554	665.937	891.644	814.473	718.46	833.928	955.384	977.473	926.363	853.446	1106.31	1420.05	626.161	1482.8	824.753	882.389	1119.64	1093.99	1080.22	47.0384
6729	SRP54	NM_001146282 /// NM_003136	438.307	667.145	512.312	990.858	1898.85	625.715	775.486	781.476	889.837	1030.91	784.512	366.783	366.689	586.309	528.455	480.428	384.373	537.084	714.829	1850.57	728.57	559.012	824.438	540.002	702.02	436.946	381.776	421.448	591.299	435.817	432.044	817.939	577.755	565.065	812.478	803.422	815.817	211.318	1338.92	629.139	464.098	708.071	554.075	687.498	49.3234
6731	SRP72	NM_006947	601.528	417.418	225.544	938.042	2157.57	909.273	506.45	725.703	956.775	1434.1	964.636	291.756	346.619	534.245	565.237	398.528	352.221	602.924	728.583	1685.55	729.765	464.22	794.338	438.067	584.93	316.968	279.245	272.13	337.731	496.983	215.654	332.708	692.89	319.796	889.853	331.451	866.193	182.093	954.72	900.812	505.278	702.624	789.182	645.124	61.5085
6732	SRPK1	NM_003137	215.774	196.949	525.814	501.552	323.779	277.557	1199.79	618.863	496.166	448.838	566.447	340.351	465.386	465.9	322.422	265.257	401.777	259.002	476.191	1561.26	808.107	537.778	351.137	461.491	637.781	278.95	348.988	381.892	411.074	336.796	392.836	558.057	565.289	323.854	584.352	1061.71	787.92	240.706	428.105	636.042	265.716	418.965	637.217	497.298	53.3782
6734	SRPR	NM_003139	358.058	597.329	297.244	396.708	660.161	687.71	1465.23	618.169	719.149	1536.61	1080.49	111.055	148.724	248.599	216.53	213.456	162.126	138.574	311.725	2032.39	268.1	212.235	1251.45	562.318	139.971	479.021	280.471	624.491	285.051	471.295	351.131	392.304	434.612	333.398	282.088	217.146	224.104	354.937	696.877	362.504	262.313	451.082	491.07	498.326	82.0945
6738	TROVE2	NM_001042369 /// NM_001042370 /// NM_004600	815.422	347.008	401.844	527.638	760.943	486.091	801.365	621.598	947.951	1639.65	404.526	492.431	499.589	452.431	590.527	508.385	373.8	951.736	749.24	1021.59	489.785	500.519	780.568	342.845	803.52	355.205	269.4	154.224	372.321	320.527	235.999	221.907	376.784	384.877	874.928	389.511	667.519	247.376	503.996	741.522	728.004	580.157	699.677	568.254	48.5351
6741	SSB	NM_003142	1520.01	276.165	229.004	451.826	1202.07	595.463	217.32	712.692	806.365	1039.54	338.563	339.269	298.03	557.987	803.483	440.508	342.569	790.836	429.046	1041.9	349.238	456.047	933.012	144.515	519.334	288.154	290.179	182.03	445.543	384.063	218.351	156.85	396.559	337.487	573.192	235.459	384.841	270.875	604.454	356.157	859.653	638.301	702.464	515.335	59.2051
6742	SSBP1	NM_003143	1740.94	1207.64	790.324	1566	3168.58	1961.25	711.762	1443.31	1918.61	2571.55	1159.08	582.814	392.372	1017.18	1136.83	629.265	657.639	1168.26	1132.56	1769.89	1692.62	1885.87	1776.86	2058.79	925.22	1023.85	818.093	892.624	1159.13	878.95	1447.55	717.231	897.086	707.703	1711.62	1424.37	3521.62	444.352	1927.73	1067.88	1099.86	1513.37	2554.42	1369.13	50.6067
6744	SSFA2	NM_001130445 /// NM_006751	691.588	254.436	357.357	176.894	854.928	615.74	638.563	535.45	311.364	408.509	320.693	533.457	786.3	361.221	774.201	827.28	351.867	1069.95	629.408	597.3	929.649	1581.23	626.456	312.176	2321.17	403.655	425.91	545.757	434.48	376.478	384.323	737.711	1121.72	403.985	1945.23	611.81	1020.61	314.049	471.147	436.129	1071.29	773.529	865.687	679.318	63.8552
6745	SSR1	NM_003144	1361.2	478.944	401.851	1092.72	3948.22	2050.56	1660.51	1693.95	1491	1323.81	1579.87	311.627	207.347	327.072	603.219	513.635	285.784	656.603	929.485	1818.03	964.201	1375.54	2348.93	1104.19	975.262	642.723	564.599	603.969	604.667	794.681	218.592	949.919	927.652	621.036	1429.82	410.554	979.226	369.945	2093.02	844.481	803.656	1343.77	1435.26	1049.79	67.6944
6746	SSR2	NM_003145	1717.21	3164.89	1313.58	2379.54	7090.55	2915.15	2702.5	2950.54	4742.26	6849.41	3060.13	832.614	757.365	1034.72	853.653	731.354	790.999	908.655	2515.36	4582.53	1467.63	1971.85	3177.29	2419.76	1614	977.016	1600.82	1366.11	1553.48	2556.55	790.344	2074.89	1984.46	1739.62	2018.58	1755.54	2811.58	1193.52	3301.12	2163.09	2577.42	3577.99	2200.05	2297.34	62.4718
6748	SSR4	NM_006280	1981.71	3986.53	1773.22	2809.83	4172.38	3404.16	1752.18	3480.62	3598.15	5914.79	10450.2	1035.67	905.54	1205.51	1460.47	1272.53	1146.98	1504.38	2428.76	2980.42	4476.65	2927.56	5201.72	4587.55	1061.45	2169.96	1940.04	4389.16	3732.36	3852.66	1489.87	4776.33	3063.2	3577.29	1931.83	2246.19	3049.14	2878.89	4057.99	3080.47	2251.37	3988.69	2706.18	3039.55	56.1988
6767	ST13	NM_003932	3143.02	2382.19	1305.17	2187.36	2456.2	1139.39	975.323	1544.26	1999.49	1759.55	1585.91	1344.73	1337.39	1633.29	1755.41	1938.27	1402.56	2032.22	2217.25	2949.05	1864.42	1335.57	2676.81	1709.72	2269.53	1618.55	2129.31	2123.7	1636.91	1465.22	2438.47	1764.04	1540.08	1767.6	1916.73	1418.9	1778.94	1248.15	1453.2	6199.29	1888.99	1933.56	1837.39	1932.63	42.0225
6772	STAT1	NM_007315 /// NM_139266	789.325	312.195	528.508	2068.12	2374.02	3086.98	3939.32	2153.95	2262.92	1099.62	664.681	204.773	150.009	316.932	568.229	297.465	244.437	501.09	614.378	799.558	713.299	858.152	956.154	499.894	463.228	415.639	471.991	462.454	1335.63	1332.66	291.186	890.304	619.473	433.96	839.438	332.151	1704.1	404.949	2278.85	1683.77	248.108	439.679	744.468	962.699	88.3542
6774	STAT3	NM_003150 /// NM_139276 /// NM_213662	1294.56	951.894	632.056	524.01	731.818	1779.26	6656.74	1910.84	1416.42	1825.96	621.477	307.292	208.438	259.014	495.68	468.046	259.672	850.579	1099.42	3017.52	1385.98	501.058	1133	1623.05	250.198	1055.28	872.448	881.723	777.951	1171.85	671.728	441.344	488.495	426.169	1072.75	301.75	644.632	311.987	1015.08	2511.42	1169.19	711.41	1580.7	1076.97	99.1202
6780	STAU1	NM_001037328 /// NM_004602 /// NM_017452 /// NM_017453 /// NM_017454	1461.28	2171.99	1222.6	1828	2016.29	1773.43	1979.66	1464.6	1639.01	1615.77	1436.95	1160.55	1125.73	1702.38	1470.44	1253	1326.21	1312.84	1991.72	2278.27	1653.47	2023.67	1639.17	1732.25	1791.59	1240.73	1880.07	1874.53	1904.76	1000.63	1235.26	1953.75	1468.49	1452.29	1686.97	1169.71	1568.86	1389.6	1312.08	3668.96	1674.33	1544.82	1457.83	1640.8	26.7658
6787	NEK4	NM_003157	253.021	100.263	148.149	229.039	374.566	278.49	110.571	235.77	223.107	172.798	212.901	270.268	212.779	267.757	474.182	336.908	208.597	405.904	291.96	204.809	155.815	235.848	498.102	129.45	238.237	154.842	186.374	164.97	261.655	147.587	126.41	237.096	138.222	140.13	214.985	1267.87	283.395	183.109	310.202	131.122	132.78	314.868	174.075	252.069	72.6225
6814	STXBP3	NM_007269	695.853	201.862	165.232	727.161	1860.6	755.72	1068.14	915.91	1417.35	834.846	301.032	476.251	370.187	435.45	924.486	695.26	401.328	1401.51	619.199	718.463	364.507	936.131	727.826	254.29	568.126	274.623	408.186	314.397	408.425	270.876	250.429	1098.24	426.665	240.864	841.405	216.915	544.95	382.567	784.694	801.5	565.061	500.436	822.164	627.654	58.1007
6829	SUPT5H	NM_001111020 /// NM_001130824 /// NM_001130825 /// NM_003169	393.29	354.373	375.771	440.506	717.807	383.629	750.149	445.864	687.078	3072.56	529.607	623.859	663.379	635.129	479.461	503.546	554.086	575.877	376.431	519.533	216.098	612.073	439.652	408.401	136.473	462.165	311.167	373.697	539.081	542.622	320.047	108.887	462.319	702.538	357.51	962.792	455.079	679.529	524.937	407.264	765.522	485.802	455.753	553.752	77.1461
6856	SYPL1	NM_006754 /// NM_182715	1257.41	683.354	1282.6	1021.83	865.231	721.862	644.036	783.252	1184.08	1415.32	929.944	520.72	219.768	323.01	534.906	823.904	333.921	1091.2	1058.99	2085.58	1969.22	847.576	1367.66	2525.63	1256.01	1117.27	1088.02	507.212	926.892	1087.22	1700.43	885.761	888.259	913.299	1527.39	2139.79	1170.97	725.008	1231.9	653.506	961.271	1127.4	1361.66	1064.19	45.9079
6867	TACC1	NM_001122824 /// NM_001146216 /// NM_006283	2756.92	711.432	1025.56	1172.66	3343.71	1895.72	2782.23	1354.99	1137.76	1442.68	379.759	947.172	425.943	1275.72	1877.54	963.131	916.852	1817.63	773.425	608.718	417.928	1062.82	1361.07	592.334	292.828	755.234	779.333	342.27	445.777	999.123	310.006	718.117	1159.43	1225.66	1309	507.362	553.58	239.194	1460.56	1377.78	2212.4	1165	1536.87	1126.35	62.2487
6873	TAF2	NM_003184	487.114	231.867	300.718	729.259	1054.03	418.281	314.934	713.75	753.041	918.088	429.902	281.457	386.595	458.099	617.026	382.669	320.266	477.128	582.412	648.757	400.954	518.906	872.277	342.977	745.963	274.548	270.592	170.538	300.744	317.653	164.84	573.971	403.209	258.485	641.677	447.777	743.506	148.486	748.122	640.042	265.464	552.891	578.634	485.759	44.9197
6879	TAF7	NM_005642	1343.66	782.545	560.138	1967.01	1774.39	1213.8	4313.26	1662.52	2581.77	2582.39	1100.38	969.694	1139.04	1302.86	1528.48	1085.41	1065.52	1316.02	1340.66	1946.39	1074.44	1285.92	1623.17	1097.26	1562.11	1345.74	692.491	418.53	947.355	1035.03	1860.64	1092.63	1212.46	850.116	1338.23	1364	1080.91	631.102	1551.7	2675.06	1326.19	1284.3	1089.77	1395.7	48.2192
6880	TAF9	NM_001015891 /// NM_001015892 /// NM_003187 /// NM_016283	791.048	582.771	345.276	882.675	981.849	634.509	311.827	514.334	813.077	1693.22	739.545	502.367	455.474	819.084	829.942	492.305	518.676	733.946	547.001	1392.24	685.216	656.347	831.95	343.145	574.432	468.002	404.741	308.193	455.714	361.536	607.439	416.984	445.861	317.783	553.977	1676.07	1265.99	162.863	730.466	363.052	456.155	574.551	756.402	651.117	51.7272
6881	TAF10	NM_006284	1375.3	2424.43	914.795	2089.56	4119.39	4302.65	3869.1	2538.4	2768.2	2464.02	1727.67	1284.69	590.035	1087.32	1597.68	1645.29	1202.93	1639.31	1462.13	1420.85	1403.99	2231.97	1066.83	2383.48	1166.56	1599.83	1521.96	1628.59	1861.3	1902.72	1796.57	1620.82	1200.9	1450.06	748.479	4478.63	2199.93	1761.5	2391.56	4325.3	1480.97	1468.71	1356.82	1943.52	49.7222
6882	TAF11	NM_005643	383.394	326.795	133.698	721.579	1103.43	485.55	243.062	898.606	953.047	915.414	345.074	204.144	189.305	302.515	419.248	200.342	244.833	369.062	633.404	351.684	349.631	582.305	353.423	304.627	523.697	197.758	202.626	315.227	325.782	288.322	309.86	590.872	334.79	232.971	578.13	409.711	806.455	188.373	712.304	532.548	771.226	505.099	465.724	448.969	53.1907
6885	MAP3K7	NM_003188 /// NM_145331 /// NM_145332 /// NM_145333	337.665	124.54	233.762	240.965	371.03	267.97	482.488	382.24	389.051	318.982	262.503	317.135	372.699	376.752	349.413	389.126	242.386	318.47	239.081	483.497	267.61	177.999	509.752	175.394	487.825	255.87	172.833	156.892	159.357	300.724	239.066	103.255	395.199	245.392	334.257	230.833	191.96	139.156	343.354	243.051	278.074	389.17	288.163	292.673	34.8634
6888	TALDO1	NM_006755	3779.62	1520.93	1326.56	2057.72	8641.82	10682	19041.9	6640.83	1166.59	765.926	2162.85	835.057	724.987	1249.81	1857.65	1128.2	870.802	2916.73	1215.1	2008.18	3260.4	3040.12	1075.93	6138.21	1019.69	800.532	1017.63	1213.53	2259.15	666.988	512.55	386.103	1524.3	1487.48	2039.71	521.306	1470.21	1084.16	2899.9	20325.8	1609.03	1793.28	4680.95	3056.28	140.619
6902	TBCA	NM_004607	3450.65	3992.73	1291.9	2591.64	4762.65	3048.6	1436.54	1878.84	2459.37	3220.67	1602.61	1242.51	1278.2	1911.51	2710.46	1504.32	1731.74	3287.74	1992.91	5088.07	2040.79	2612.47	4211.14	2002.18	3565.5	1353.86	2021.35	3151.61	2451.61	1296.91	1475.25	1720.51	1907.95	1663.65	2281.08	1361.21	3346.55	1190.96	2489.18	1454.36	2598.24	2461.31	3049.48	2376.53	41.4071
6908	TBP	NM_003194	243.343	382.887	293.159	636.51	547.836	269.469	294.149	449.042	467.105	403.032	225.763	181.29	245.348	264.703	242.181	173.556	206.463	190.705	319.906	264.819	273.106	269.866	282.387	199.571	364.102	182.369	188.791	214.907	228.737	242.97	290.648	233.282	369.267	221.14	259.41	901.343	276.433	114.438	391.818	250.978	216.006	295.811	237.723	297.822	46.4941
6917	TCEA1	NM_006756 /// NM_201437	2821.73	1288.98	1271.41	4338.08	4062.16	2106.07	1360	2168.14	3091.12	2641.99	2101.89	1202.62	855.404	1380.52	1745.17	1512.95	957.951	1899.2	1436.72	3907.25	1876.53	1950.86	2550.86	1781.92	2239.26	1037.28	1017.87	944.576	1213.87	1813.85	1036.18	1322.93	1152.57	1579.95	2080.81	963.16	1696.4	1239.94	2586.34	4207.98	1762.56	1710.69	2233.81	1910.45	47.3453
6921	TCEB1	NM_005648	806.895	430.828	1103.83	275.343	1112.89	317.816	534.347	385.432	444.125	361.365	182.545	273.182	285.183	269.312	387.486	290.403	270.738	443.861	1401.14	1623.3	415.41	1415.59	976.915	1039.1	815.144	764.815	508.559	320.15	520.042	269.721	593.816	395.796	348.163	1176.49	918.137	264.709	569.349	246.926	482.752	401.872	9927.58	1118.27	863.448	826.808	177.663
6923	TCEB2	NM_007108 /// NM_207013	562.603	599.572	350.271	270.014	693.119	824.447	893.973	730.487	553.677	1203.88	317.478	403.569	443.848	763.02	1013.87	331.939	614.445	744.578	385.203	630.287	831.953	1291.31	849.063	909.775	351.632	421.385	478.905	531.761	775.902	265.517	900.712	135.939	385.372	586.165	491.49	1887.89	573.384	385.945	318.491	3906.97	597.31	914.348	1164.84	727.589	81.945
6924	TCEB3	NM_003198	534.22	180.707	239.405	166.449	308.479	312.405	212.293	307.922	286.824	436.43	265.494	260.944	312.231	280.191	303.716	291.732	253.568	369.905	313.097	525.807	328.164	206.972	496.656	279.576	458.96	251.237	305.556	401.748	318.96	321.443	401.401	125.841	327.785	296.712	408.812	333.02	251.305	216.312	296.621	170.345	314.417	354.472	360.038	311.353	29.238
6938	TCF12	NM_003205 /// NM_207036 /// NM_207037 /// NM_207038 /// NM_207040	287.708	165.892	195.875	263.176	442.594	149.137	140.751	237.462	331.837	275.061	193.708	274.574	233.712	242.321	488.572	290.591	209.51	622.866	498.606	471.992	312.175	297.854	582.525	154.612	1529.43	236.1	219.979	159.721	223.162	168.422	199.001	289.889	254.965	233.819	651.871	233.115	623.058	195.627	280.817	291.424	630.588	910.974	586.912	355.395	71.3519
6944	VPS72	NM_005997	564.572	596.684	200.503	426.761	441.449	533.534	598.08	501.595	644.985	216.8	387.045	765.209	871.85	766.507	620.787	832.567	718.117	581.496	534.53	391.301	491.45	289.856	463.558	827.006	552.509	642.784	440.588	677.927	582.256	599.974	844.538	421.637	576.905	594.229	378.104	514.574	552.92	613.931	559.672	549.127	656.545	616.799	361.084	558.194	27.9821
6945	MLX	NM_170607 /// NM_198204 /// NM_198205	550.891	281.574	140.252	272.122	847.462	801.987	1125.04	598.838	481.528	242.479	308.589	170.035	189.575	171.874	219.342	155.867	163.243	187.665	284.473	251.225	459.595	622.443	288.07	681.956	318.287	555.484	277.246	457.646	299.292	324.234	572.22	261.049	200.675	236.145	330.238	114.762	323.488	210.982	517.343	394.692	189.373	309.604	362.235	366.305	58.6423
6950	TCP1	NM_001008897 /// NM_030752	868.719	900.579	420.856	991.635	1928.07	791.326	518.699	649.813	1105.52	1172.91	736.009	633.072	662.236	1264.72	1178.44	704.141	900.838	928.635	1031.75	1430.79	1032.98	1210.16	727.929	1034.67	775.457	688.55	566.331	500.716	756.588	517.557	908.193	698.575	611.31	530.786	835.603	1304.64	1215.63	177.571	1010.19	775.162	697.253	887.106	1151.35	870.536	36.0648
6990	DYNLT3	NM_006520	1491.61	1342.37	978.698	1142	1195.49	968.041	594.815	985.7	1756.37	2062.63	634.091	1608.36	1146.47	2402.92	3160.57	2196.57	2021.37	3019.43	1101.2	3052.46	3338.07	1469.33	1741.44	2121.42	4058.64	906.766	1412.06	809.895	1006.95	607.478	568.689	1939.35	1363.22	912.748	1535.12	404.73	1189.56	697.954	929.999	480.918	1365.85	2703.34	2056.03	1546.06	55.5854
6992	PPP1R11	NM_021959	1165.15	1262.96	1320.23	1152.41	1386.85	2305.38	4302.5	1892.3	1624.77	1272.86	1305.43	1452.28	1070.08	1773.61	1599.27	1308.64	1586.24	1400.6	1483.74	851.844	1654.41	2542.67	1295.55	2941.08	1674.89	1505.1	1470.14	1423.5	1593.28	1260.14	1296.41	1175.07	1393.91	1238.23	1072.01	1493.66	1826.82	1205.75	1211.01	2570.43	949.744	1229.15	1710.68	1563.97	38.5315
6993	DYNLT1	NM_006519	1917.69	2341.09	1916.15	962.665	2000.88	3001.9	4016.96	2523.51	2350.59	2940.69	1399.4	556.71	448.421	840.522	950.391	660.741	696.012	972.8	2730.31	2835.2	3504.19	4014.84	2928.17	3791.79	2961.39	1340.26	2101.95	1111.99	5357.09	1051.42	1900.36	2005.15	1899.12	2114.85	1623.61	2911.12	4851.37	1790.49	1478.64	3309.56	3404.43	3099.42	2205.36	2251.61	51.7515
6996	TDG	NM_003211	340.367	440.515	334.007	1450.79	1969.37	705.153	360.976	985.47	1217.73	810.786	503.296	179.649	192.324	319.475	350.12	128.683	227.61	193.296	1004.75	1019.88	651.814	830.791	506.632	362.035	988.582	185.199	199.817	201.33	437.283	260.286	204.936	1357.38	784.415	311.984	798.387	103.703	2052.7	125.398	1621.9	1027.41	817.464	569.477	637.671	645.833	76.7701
7009	TMBIM6	NM_001098576 /// NM_003217	2770.12	3717.43	3194.06	2570.43	6118.19	4299.44	8126.9	4177.89	2837.27	5235.27	3832.75	1903.77	1562.14	1780.72	2517.32	2452.58	1769.07	3010.13	3002.6	4133.39	3925.58	3750.19	3514.18	4516.08	1822.99	2214.38	5645.13	7058.62	4496.26	2742.06	1750.83	2324.06	3111.95	3716.08	2493.08	3101.65	3629.68	3110.85	3743.95	5198.18	1880.65	2643.94	2567.83	3441.16	41.8822
7014	TERF2	NM_005652	475.663	481.822	453.354	525.034	311.147	380.377	619.349	651.344	632.998	561.967	508.454	797.534	1041.35	1214.05	824.179	802.064	928.09	699.46	441.94	590.623	428.779	434.906	528.027	659.498	430.592	534.303	461.544	392.373	442.006	706.173	612.372	314.372	333.7	479.205	343.628	413.211	455.477	351.363	696.461	442.124	412.893	506.099	435.528	552.452	35.3517
7027	TFDP1	NM_007111 /// NR_026580	274.063	160.471	312.103	332.977	343.357	313.797	431.838	348.563	383.157	163.035	582.544	167.601	310.423	198.005	169.557	176.278	105.481	148.505	243.741	494.568	624.453	188.565	276.069	369.717	227.321	318.13	129.47	368.635	221.934	296.218	244.362	127.776	383.324	312.325	442.461	630.583	454.354	204.378	412.789	2092.91	280.592	432.52	465.837	352.669	85.6854
7037	TFRC	NM_001128148 /// NM_003234	1446.76	1532.27	1445.91	3676.71	4981.41	980.575	687.679	963.254	2823.05	2612.09	4096.83	605.625	686.773	1280.56	1244.07	862.411	925.734	742.602	1979.75	6526.85	2015.72	4949.72	991.34	2424.45	3752.7	1211.98	1134.55	1711.79	2455.87	976.37	2187.75	2970.61	7653.36	555.223	1671.36	828.706	3608.26	926.444	3909.51	6805.85	2219.9	1802.86	2432.12	2309.24	76.1644
7072	TIA1	NM_022037 /// NM_022173	283.008	223.148	193.325	827.223	631.274	343.986	471.809	558.993	755.502	443.107	323.786	297.538	468.474	417.344	452.791	278.781	259.705	369.42	619.5	504.845	316.802	302.032	688.481	102.001	467.282	320.046	240.106	146.699	235.044	371.168	159.308	330.157	357.835	251.256	444.832	119.02	330.56	109.332	533.902	429.494	549.237	689.05	355.925	385.421	45.5714
7095	SEC62	NM_003262	3195.1	1131.69	932.801	2570.43	1378.54	1358.36	1623.13	1715.79	1469.77	3811.8	2112.38	1445.98	1269.66	2071.93	2663.3	1781.65	1531.87	4312.21	1670.68	2955.49	996.105	1663.87	3118.2	516.962	1728.15	989.302	1567.17	1574.39	1509.38	1129.19	800.283	999.146	1599.2	1407.5	1641.45	695.203	2105.01	1043.26	1100.92	4630.87	1834.36	1647.6	1755.12	1791.98	50.9332
7155	TOP2B	NM_001068	926.703	608.57	647.536	1791.79	2790.42	971.79	1075.81	1489.44	2407.05	1786.66	1053.25	783.756	1118.57	1322.04	1392.35	855.12	992.201	1224.16	1525.75	1515.21	1063.22	992.667	1764.97	483.151	1916.65	725.366	450.851	287.695	767.587	778.035	652.097	923.455	781.156	758.045	1294.42	359.197	1790.9	727.312	1661.65	1723.68	1202.35	1393.48	1091.15	1159.7	46.2412
7167	TPI1	NM_000365 /// NM_001159287 /// NR_027483	890.398	2399.94	1040.99	830.048	2233.13	1690.62	1086.11	1038.09	1264.32	1483.72	1119.06	1463.96	1742.57	2468.16	2501.4	1582.62	1956.38	1612.71	1050.74	2715.49	2351.55	2678.1	1560.68	4738.91	692.189	2098.31	1774.44	1249.2	1265.33	816.538	5009.14	788.199	1020.04	807.618	1113.09	1377.33	1737.51	853.86	2050.86	1528.06	2307.7	1688.52	1730.59	1707.17	53.1318
7175	TPR	NM_003292	556.662	382.3	268.249	612.147	568.083	589.491	2081.72	823.366	1500.49	1291.73	529.532	371.948	401.913	368.286	427.381	341.385	266.141	521.416	523.897	843.367	530.682	188.8	1070.66	186.151	996.221	388.737	355.22	264.447	309.753	538.558	324.545	114.315	571.832	316.913	516.399	1291.95	261.011	298.05	574.954	361.226	641.376	601.515	541.165	570.093	67.7328
7178	TPT1	NM_003295	26054.9	29509.2	22771.5	35498.6	24493.3	28429.5	22253.7	26561	22763.9	28078.3	24129.2	12913.6	9584.48	12776.1	14016.1	11669.9	11511.8	19734.8	22666.6	20431.4	30403.3	36710.4	22679.7	18548.7	22328.1	14859	18972.6	16844.2	23581.4	19891.1	38425	29304.5	22143.6	22975.8	17969.7	10528.3	20909.3	19635.6	18590.3	38942.9	46994.7	19154.2	30723.1	22952.6	35.6804
7184	HSP90B1	NM_003299	1990.55	1830.09	861.801	1208.84	3117.68	1422.87	799.763	1291.3	1560.66	2312.37	4863.89	686.066	332.13	976.799	1148.87	921.967	610.387	1459.4	1397.76	6241.93	1344.51	1557.24	5792.89	650.736	1202.43	1331.11	1491.03	1979.88	1112.09	1479.23	364.528	944.601	3295.95	1925.61	1585.32	1184.05	861.905	2071.54	2061.14	671.713	2733.55	2837.28	1735.9	1749.99	73.3624
7203	CCT3	NM_001008800 /// NM_001008883 /// NM_005998	1098.76	2525.85	1206.69	1966.15	3375.78	1167.87	587.344	1284.85	1969.91	1804.34	1603.02	979.172	1205.13	1584.13	1560.67	1256.67	1294.87	1262.79	1839.54	3291.52	2439.01	1674.2	1108.59	2048.88	1071.9	1058.72	1291.55	1399.12	1682.32	1389.18	1409.27	1139.28	1434.53	1684.44	1441.77	2327.27	3137.1	813.322	2313.79	1730.92	2042.72	1834.18	1759.71	1653.41	37.6053
7247	TSN	NM_004622	435.039	278.869	185.872	419.844	1108.11	357.833	394.712	407.575	581.722	904.611	410.572	272.157	220.081	432.176	500.069	387.656	273.115	552.689	368.431	587.505	334.734	370.979	611.38	320.997	528.207	270.856	226.477	228.326	243.03	276.87	292.682	292.948	218.422	201.543	636.637	653.141	340.121	118.703	483.519	347.998	269.733	414.834	528.828	402.084	47.2913
7248	TSC1	NM_000368 /// NM_001008567 /// NM_001162426 /// NM_001162427	537.781	681.496	389.007	698.267	502.569	417.788	395.676	463.744	579.807	595.964	347.138	783.313	1004.16	998.191	1025.71	726.729	828.743	1000.09	475.874	366.144	389.556	441.424	479.557	248.751	466.974	585.732	427.228	266.859	398.136	422.414	649.511	494.845	456.838	457.455	463.735	364.265	422.159	447.932	408.39	393.385	397.836	499.058	469.177	531.847	37.1175
7251	TSG101	NM_006292	1091.19	1670.02	394.434	973.29	1896.39	1524.65	2252.33	960.806	617.199	1128.93	566.896	813.095	645.706	911.164	1115.62	857.882	697.18	997.925	992.386	2104.7	2120.99	1578.15	930.666	2180.6	1554.46	897.493	813.737	438.682	1264.85	595.194	1374.52	810.59	1114.89	864.013	1151.68	1158.7	1302.43	347.847	1326.02	4533.49	1090.67	1004.8	1292.2	1208.34	58.2694
7257	TSNAX	NM_005999	630.003	556.527	210.878	790.999	1355.11	1002.26	601.152	1371.78	867.096	570.445	332.893	421.605	360.358	628.535	1013.38	431.513	470.977	676.677	549.915	444.233	272.368	618.108	802.215	280.106	482.127	453.877	459.781	326.283	476.733	355.867	699.898	467.901	351.679	367.894	831.124	474.382	629.431	220.902	810.798	744.935	538.596	534.842	701.607	585.763	44.7653
7259	TSPYL1	NM_003309	1701.73	2460.19	768.801	1477.08	2261.85	1083.36	1241.85	1613.27	3078.17	2686.79	1046.57	2332.11	2375.94	3328.94	4599.12	1837.77	2777.78	2139.88	1262.26	1425.77	975.448	1640.52	2665.07	1366.63	1372.27	1343.69	1932.56	1505.58	1013.87	852.972	2940.35	1137.02	746.242	1261.11	1910.08	1290.75	1321.31	707.847	1605.24	2078.76	1318.37	1496.58	1863.71	1763.84	45.3196
7267	TTC3	NM_001001894 /// NM_003316	2192.72	1540.82	653.434	874.394	1531.81	629.576	523.689	913.651	1440.48	1711.99	810.484	1617.52	1884.74	2887.65	2833.33	1261.14	2033.76	1959.49	1798.33	1939.34	763.415	641.218	3518.88	373.111	1677.33	712.786	627.162	341.859	577.805	625.521	588.817	496.193	705.674	1005.46	1546.01	767.071	976.403	579.945	743.888	490.642	1301.54	1484.7	1379.56	1231.71	59.8021
7277	TUBA4A	NM_006000	253.974	833.008	590.787	1928.8	1166.33	2129.05	5195.77	2287.23	2997.77	4419.37	1194.05	529.912	1163.3	3122.85	2112.4	978.083	1751.44	1294.75	647.421	213.13	4577.83	2087.87	365.529	3210.21	3359.14	646.028	501.384	368.709	781.451	1208.56	3257.37	534.883	337.112	863.794	2808.83	1359.12	861.988	203.557	1247.01	3456.87	660.369	429.278	2383.28	1635.34	80.0112
7278	TUBA3C	NM_006001	294.127	160.059	167.014	240.416	187.902	332.175	300.132	337.372	281.678	377.186	246.995	188.604	456.254	425.917	317.951	322.613	348.488	307.724	301.05	329.392	274.989	408.988	380.443	408.933	265.249	581.666	265.265	334.343	185.02	277.336	576.883	167.77	399.465	371.886	272.436	7904.42	396.149	135.511	300.243	394.119	449.111	321.657	237.122	493.769	235.195
7280	TUBB2A	NM_001069	3420.89	1388.7	630.41	339.345	237.372	172.078	245.602	297.086	893.031	1331.98	499.853	4478.94	5726.33	13144.2	12008.7	6743.43	9064.28	12112.6	2154.12	4221.99	6293.28	4057.71	2452.6	5841.67	10268.6	584.295	988.291	1418.84	1940.8	218.595	505.29	1946.61	1838.93	560.507	3881.31	457.382	1289.3	122.739	530.61	7609.43	3930.57	1027.51	4159.58	3279.9	110.004
7284	TUFM	NM_003321	1339.99	2637.52	1262.5	1203.65	2292.6	1570.83	901.672	1001.51	1490.51	1315.03	1813.12	838.443	945.917	1254.11	1143.71	1084.97	985.324	1450.23	1621.53	1255.27	1554.41	2263.36	966.077	2799.73	392.809	1647.41	2034.07	2101.79	2032.47	1179.79	2107.34	634.823	1046.91	1341.99	1169.16	2308.25	1648.75	1365.84	1803.03	939.368	1443.5	1524.38	1963.15	1480.86	35.9183
7295	TXN	NM_003329	1688.72	799.721	1478.31	823.406	4035.33	1774.77	2858.46	1394.41	1073.43	1782.22	1781.39	741.059	596.015	1418.72	1466.93	888.636	1193.19	1514.88	1732.07	4967.39	7494.99	8468.09	1922.32	10563.4	3589.3	758.504	2317.81	2312.84	3657.86	865.859	951.559	1615.49	1442.97	1535.01	3616.8	323.004	2758.56	795.067	3152.76	1695.72	1369.65	4200.69	6074.58	2453.3	89.3806
7296	TXNRD1	NM_001093771 /// NM_003330 /// NM_182729 /// NM_182742 /// NM_182743	1272.94	3418.66	752.742	592.117	1370.64	1108.9	1902.33	1070.33	677.502	771.813	1038.22	706.669	576.026	789.88	888.235	937.542	663.754	916.952	639.583	2623.59	389.628	1284.8	1109.88	424.39	463.718	1450.44	737.562	751.878	1451.16	706.234	1148.22	807.693	1919.81	828.109	591.432	801.01	1375.76	699.947	970.938	1122.5	3299.38	1242.83	455.273	1087.23	61.7026
7307	U2AF1	NM_001025203 /// NM_001025204 /// NM_006758	1234.62	2901	819.718	1328.35	2294.63	1643.67	377.414	881.234	1125.41	474.58	1587.95	716.477	546.761	953.803	1099.79	678.276	674.147	1070.66	1748.05	1399.98	1366.86	1180.67	1823.59	845	1366.61	617.416	1032.36	1318.93	1015.61	728.363	384.183	1375.52	1818.18	1107.46	877.295	352.067	2252.52	957.117	1192.49	674.709	720.713	1514.34	1482.56	1152.58	47.1843
7311	UBA52	NM_001033930 /// NM_003333	8739.65	6607.42	5975.83	11476.6	11816.3	12314.3	16423.9	15567.7	13766.8	20072.4	9272.54	3271.96	2399.87	4042.43	4509.84	3459.16	3505.29	5329.94	8406.79	10156.5	14529.4	9415.75	6934.27	10925.6	9819.84	4769.85	4994.87	6535.28	8104.78	10143.3	10700.9	5750.8	4901.27	6421.02	6981.17	6864.56	13334.7	4931.22	8506.58	35053.8	10328.6	7271.4	11173.9	9197.86	61.1813
7314	UBB	NM_018955	17590.2	30484.3	13050.2	25555.6	19447.7	19231.1	20581.9	21167.7	13253.7	20652.7	17863	12147.7	9676.73	17434.3	17595.8	12558.6	14510.4	20769.6	14149.7	15726	19966.6	25139.8	14126.8	13904.4	16396.6	11367.5	15356.2	17231.8	21076.5	11400.4	24055.7	16847.5	13403.2	15492.9	10812.6	17055.7	20444	11710.4	13235.2	60283.6	19952.9	12432.8	17111.6	17959.3	44.3489
7316	UBC	NM_021009	19040	18647.2	12058.3	13160.7	16701.1	18974.5	28976.1	18872.6	16530.4	23605.1	21294.4	11135.8	10871.7	14874.1	12086.4	11092.1	12896.3	15937.9	12064.4	17057.3	32410.5	20356.7	14422.9	18182.3	6639.28	12324.3	11615.3	9440.73	15642.6	13268.4	20779	9700.23	17008.8	15959.5	11901.2	17507.4	11706.6	9416.46	13312.4	25660.8	20808.3	13299.7	19398.9	15968.3	33.225
7317	UBA1	NM_003334 /// NM_153280	1671.26	3201.21	1177.7	1480.2	1588.86	1605.57	3181.18	1653.83	1848.93	2021.19	1633.15	1563.26	2490.28	2829.86	1786.46	1895.07	2184.26	1906.69	1520.4	1973.24	2317.64	2716.57	1727.97	3553.63	1106.79	1835.67	2423.69	1432.88	2143.61	2143.95	2057.23	281.974	1484.84	1976.04	1531.04	2203.18	1076.26	1968.46	2273.58	1367.07	1722.47	3135.61	2181.47	1950.56	32.1532
7319	UBE2A	NM_003336 /// NM_181762 /// NM_181777	974.19	422.011	356.486	691.647	2455.48	1210.11	1139.07	851.037	897.119	1510.95	770.866	566.747	372.388	603.423	695.874	656.039	488.299	816.947	655.122	989.544	1038.77	1836.8	917.461	1458.86	936.675	1041.79	548.518	368.126	582.474	584.715	1148.92	603.557	2375.04	490.061	803.052	415.405	1147.59	308.296	1396.61	1173.94	709.028	923.314	914.106	903.406	53.2129
7320	UBE2B	NM_003337	704.959	729.712	294.417	396.415	876.918	796.222	3034.27	948.532	973.688	1296.87	470.027	677.949	651.883	862.693	1034.35	569.767	634.907	772.136	519.217	1018.07	593.165	649.459	749.841	564.493	973.616	876.004	419.745	386.497	369.435	344.392	1812.71	589.233	560.477	348.66	658.035	455.968	541.516	294.885	508.925	4693.92	737.164	534.835	581.389	825.753	91.8141
7322	UBE2D2	NM_003339 /// NM_181838	620.148	555.408	431.582	1384.52	1640.04	939.793	1427.55	978.882	1546.97	1415.67	745.993	586.553	501.772	822.649	839.719	677.031	672.538	744.052	594.245	845.034	744.69	868.87	722.57	1261.64	563.083	545.779	368.902	402.302	528.831	632.716	968.961	719.238	581.178	452.247	603.584	1261.18	1287.01	443.577	998.858	1114.77	860.145	918.642	687.553	825.732	40.2051
7323	UBE2D3	NM_003340 /// NM_181886 /// NM_181887 /// NM_181888 /// NM_181889 /// NM_181890 /// NM_181891 /// NM_181892 /// NM_181893	2337.37	2041.83	1348.48	2215.19	5178.68	4314.03	7621.19	3636.59	4202.6	5565.14	2181.61	919.259	807.395	1337.48	1429.51	1247.33	1043.31	1586.02	1718.45	4521.41	2225.95	2492.64	2388.5	2554.17	1218.25	1970.57	1649.76	1730.55	1605.51	1644.17	1921.06	1313.07	2062.01	1057.12	2238.07	1314.53	2931.82	976.142	2734.53	8627.36	1814.82	1811.67	2376.93	2463.07	68.7599
7324	UBE2E1	NM_003341 /// NM_182666	1968.95	1072.32	1211.14	1890.92	3021.65	2882.54	1132.74	1677.09	2034.18	1182.63	1515.82	1244.89	1211.02	1605.47	1904.03	1667.61	1300.88	2191.33	1776.26	4063.24	2477.96	2750.25	2011.35	2738.85	1687.59	1315.04	971.182	380.955	1745.05	1483.72	1599.25	1148.9	1415.34	1047.39	2260.11	1282.93	3146.62	783.842	2204.54	1111.14	1402.12	1955.55	2673.41	1770.88	41.0471
7326	UBE2G1	NM_003342	715.461	592.376	368.18	1073.07	1248.74	721.497	1277.15	812.847	1277.2	901.767	852.512	666.762	483.429	757.974	884.067	733.561	664.514	875.115	613.936	1038.08	1478.61	773.917	609.197	2276.68	809.99	935.686	570.555	604.44	632.513	604.421	3226.9	650.583	522.578	521.65	745.924	732.038	1186.16	331.486	1065.21	710.725	646.192	682.154	835.257	877.003	56.7206
7329	UBE2I	NM_003345 /// NM_194259 /// NM_194260 /// NM_194261	336.249	554.707	391.438	567.153	699.836	697.001	687.559	541.727	448.151	392.844	408.667	261.951	405.972	361.631	334.607	311.616	280.288	238.638	388.238	727.547	406.635	346.409	359.288	517.976	253.473	396.774	207.646	111.611	347.926	392.855	308.886	300.956	407.966	402.283	365.574	382.681	737.123	246.557	492.884	334.293	309.715	467.146	351.806	406.611	35.3066
7332	UBE2L3	NM_003347 /// NM_198157	1070.84	715.805	355.873	481.472	1350.46	853.769	1169.37	776.892	764.63	1206.73	488.55	758.623	717.805	896.86	736.114	902.765	742.538	978.486	430.088	857.672	824.01	811.919	910.318	1406.48	333.048	624.007	507.314	337.666	591.03	546.559	613.488	219.259	840.999	505.824	600.157	644.112	904.689	265.755	779.914	616.197	863.769	788.857	1009.06	739.529	36.5959
7334	UBE2N	NM_003348	705.583	564.276	457.604	749.105	1336.38	802.875	850.28	885.043	1365.04	1985.48	762.387	585.992	584.8	1194.15	1027.3	831.87	846.475	1103.01	442.894	1126.43	1333.01	809.307	1095.78	1204.77	385.749	830.273	511.071	314.822	480.036	750.936	750.081	262.952	621.974	453.248	714.152	2964.45	682.94	244.223	1074.83	677.293	768.934	919.519	1022.9	862.33	54.9016
7341	SUMO1	NM_001005781 /// NM_001005782 /// NM_003352	928.904	564.599	216.787	587.686	2446.03	917.332	1026.29	1012.43	1272.67	2140.81	482.795	485.191	652.318	1036	1088.33	603.881	670.047	918.666	968.735	1211.26	599.979	1112.76	1315.77	489.341	861.301	392.356	625.676	786.264	537.267	353.458	664.84	548.233	413.871	342.053	1105.51	502.884	1357.88	275.544	1070.35	1090.07	822.06	916.209	1049.62	848.001	52.2246
7342	UBP1	NM_001128160 /// NM_001128161 /// NM_014517	612.766	366.448	498.26	1116.13	2439.97	793.404	722.61	1459.53	1918.97	1265.13	649.61	476.723	766.453	754.081	740.761	414.995	542.202	376.847	1191.58	692.125	577.637	1012.68	739.167	542.898	907.069	536.769	333.645	249.794	547.749	791.095	342.784	1039.56	414.375	515.71	808.851	313.615	1536.05	388.65	1212.65	805.209	1090.83	846.329	738.681	792.8	55.8589
7353	UFD1L	NM_001035247 /// NM_005659	1072.5	593.388	325.84	487.351	1377.62	908.158	1085.67	784.714	1078.1	1941.06	497.01	114.238	268.273	414.717	355.977	154.22	159.941	606.136	417.186	1073.72	835.844	1211.07	1197.94	913.642	425.365	385.352	317.162	281.322	571.787	479.209	421.04	245.577	925.847	634.312	1005.15	948.635	744.266	213.318	766.781	1730.98	865.564	888.29	1481.12	725.707	59.5557
7357	UGCG	NM_003358	885.183	2145.65	912.409	960.297	3392.37	550.584	877.005	813.88	1591.21	1068.67	857.185	669.133	777.912	781.369	768.151	795.446	707.167	585.509	793.301	2751.41	3203.77	1057.72	2152.82	1022.76	790.459	221.602	1250.63	759.871	1013	1667.07	104.463	709.798	564.316	307.559	1328.93	290.423	750.904	310.272	2865.93	1283.5	1379.67	1054.51	2102.41	1136.66	68.6668
7360	UGP2	NM_001001521 /// NM_006759	9758.23	1755.73	1443.06	1884.16	3721.82	2151.68	3129.03	1936.03	3169.38	2020.83	1596.89	2599.12	1721.01	4359.08	3648.73	1966.74	3120.42	2376.67	1970.38	7169.06	2715.92	7393.54	2077.06	2880.09	1396.34	4168.22	2130.26	6387.41	2271.78	1887.84	7987.52	1234.35	2592.04	1570.34	2762.06	1239.51	2654.49	1175.9	2303.77	1427.03	3671.87	1803.99	2716.62	2975.49	65.6162
7375	USP4	NM_003363 /// NM_199443	584.363	515.448	351.784	904.365	1443.45	1470.78	3049.46	1348.11	1246.87	1358.72	608.445	755.032	705.777	680.192	656.506	494.192	573.106	698.427	866.451	395.558	938.539	579.931	484.49	777.055	1088.8	496.912	486.287	361.755	651.384	691.652	495.376	473.596	382.829	488.996	632.635	764.313	719.65	343.437	903.923	1710.84	553.065	601.896	701.249	791.526	61.0591
7381	UQCRB	NM_006294	4620.54	1556.2	1521.82	2071.92	4382.44	3291.39	1265.88	2918.6	4923.8	9115.45	1771.35	2100.1	1660.91	2867.38	3079.66	2205.65	1985.8	3606.66	2667.56	3370.65	3246.61	3689.57	4043.99	2572.51	3198.42	5234.82	2537.98	1758.05	2318.66	2212.05	8193.69	1544.54	1121.74	2367.18	2550.95	1234.42	4964.5	1015.25	2246.28	1294.23	3241.88	2913.41	4547.55	3000.75	56.3389
7385	UQCRC2	NM_003366	3010.63	1544.94	1112.33	1713.37	5619.16	2300.67	1266.54	1724.37	2477.5	2767.89	1429.42	1090.68	1265.76	2043.55	1847.88	1083.01	1423.62	1455.61	1764.18	1684.44	2225.44	3341.52	1606.71	2670.54	1539.02	3630.55	1791.64	1627.9	1362	1255.37	5406.49	1483.07	999.553	1158.62	1936.54	776.413	2144.61	864.957	2658.61	2090.33	1695.46	1474.11	2665.08	1977.44	51.8496
7386	UQCRFS1	NM_006003	3680.39	5751.49	2255.23	2667.95	6679.1	4391.12	2112.53	2535.43	4078.86	3713.05	2891.01	2220.72	2082.53	3635.98	3117.51	2067.11	2912.75	2463.25	2358.9	4078.82	3408.58	5475.88	2663.95	5000.99	2048.74	6811.74	4293.89	4273.28	2544.02	1877.68	13354.2	2100.31	2035.7	2074.06	2631	3315.85	3310.61	2229.47	3045.11	3034.47	2634.81	2306.04	3683.82	3484.84	56.6672
7388	UQCRH	NM_006004	4113.76	2020.68	2135.64	3419.11	4473.84	4018.56	1735.02	2605.58	3237.47	6281.52	3445.58	2415.95	3147.61	4666.46	3649.62	1872.78	3437.67	3552.09	2863.19	5014.82	6395.96	5047.69	2522.94	5638.27	2442.42	6105.14	3289.84	2347.99	2485.35	1892.77	7535.87	1228.71	1392.28	2188.67	2651.33	1149.04	5414.71	1398.64	2878.8	3937.56	2267.86	2719.55	4746.31	3390.34	45.5782
7389	UROD	NM_000374	981.378	1447.63	230.08	537.939	1668.11	620.736	270.272	538.457	562.144	548.356	1136.97	411.153	441.923	654.493	731.883	397.162	480.108	623.799	796.884	395.456	585.628	613.154	654.011	715.4	698.423	484.571	566.585	1054.07	698.961	470.947	603.143	290.104	462.359	489.382	644.435	487.307	747.606	261.42	820.492	5344.58	605.878	737.99	735.685	749.932	102.777
7398	USP1	NM_001017415 /// NM_001017416 /// NM_003368	575.106	307.59	139.859	945.96	1486.21	698.443	1102.77	752.542	1217.46	960.88	601.251	318.265	465.729	469.491	447.715	370.623	297.943	506.107	614.617	1265.49	476.837	443.836	1112.68	356.626	1016.93	256.302	227.637	188.642	237.903	473.564	255.424	343.958	446.57	226.348	896.029	1427.37	886.892	253.755	868.942	582.958	515.791	592.134	884.524	616.644	57.6764
7411	VBP1	NM_003372	1469.35	1237.93	627.832	1649.68	2721.81	1420.83	1532.4	1763.83	1709.96	1587.76	1317.93	1481.28	1356.02	2345.83	2498.28	2195.21	1804.26	2921.61	1102.17	1540.02	1231.43	1400.89	1126.26	1000.75	1721.68	1686.88	775.575	416.831	822.803	802.51	2734.7	979.992	884.65	684.171	1080.18	416.984	2376.81	487.965	1625.14	1826.74	1080.19	1138.27	1282.11	1438.78	43.5535
7414	VCL	NM_003373 /// NM_014000	622.758	259.034	799.869	358.736	1167.76	1076.12	1200.39	862.482	363.7	283.897	360.048	183.234	175.921	143.045	212.634	229.008	174.164	171.508	908.687	1027.23	613.132	738.849	999.962	833.183	584.749	1375.66	497.539	211.501	359.589	435.676	695.74	401.017	444.48	1348.78	467.7	498.609	754.785	437.984	448.827	581.714	4036.43	883.995	446.179	666.891	93.8067
7415	VCP	NM_007126	958.447	1249.76	474.954	758.246	1687.98	891.095	1563.75	706.258	1077.54	1089.89	1124.88	578.68	667.3	603.404	571.354	650.221	562.312	667.961	608.82	1564.59	903.405	736.012	1010.95	1387.52	743.226	860.845	723.84	694.182	895.897	773.039	972.937	520.409	1090.26	805.514	820.148	729.642	832.805	698.597	1285.04	786.583	996.515	971.227	1071.16	892.261	32.4623
7416	VDAC1	NM_003374	1219.06	1145.35	730.092	591.872	1330.19	615.235	356.498	663.676	684.181	1437.06	727.604	977.451	842.898	1806.8	1712.14	1028.68	1279.3	1516.46	633.731	2792.51	1207.5	2397.79	1530.8	1837.93	239.341	2606.39	1299.46	1012.6	799.073	458.213	4922.15	484.45	1069.71	810.06	1262.47	495.902	842.91	500.951	993.099	439.061	959.95	1300.83	1620.18	1190.27	69.1087
7417	VDAC2	NM_003375	3522.74	4182.92	2075.57	2745.54	5402.15	3244.97	1236.56	2036.15	2865.93	3278.36	2323.32	1993.9	2570.47	3094.38	2702.84	2222.33	2633.32	2814.89	2301.82	3667.21	6930.08	7259.64	2017.93	9653.25	3085.3	6123.81	2711.68	1705.76	2590.85	1576.57	7796.75	2874.85	2356.66	2218.61	2720.11	2509.16	3820.31	1478.35	2962.57	2120.35	2783.97	2266.53	4038.36	3267.83	54.9165
7419	VDAC3	NM_001135694 /// NM_005662	2126.01	1405.48	853.7	1438.71	4870.33	1926.98	1301.04	1966.54	2291.91	2161.17	1780.33	1685.37	2149.48	3225.14	3584.8	2145.01	2376.53	3481.1	2352.73	976.511	2824.67	2812.63	1809.44	2744.2	1705.5	3397.36	1379.58	1281.85	2270.48	1035.32	8645.47	3760.67	961.478	1182.36	2066.69	2509.42	2856.87	1040.5	2690.35	1804.89	2026.46	1776.67	2306.58	2302.05	56.9121
7431	VIM	NM_003380	20984.8	5463.35	5942.15	4180.78	17500.1	18114.7	15072.6	11276.3	10122.2	15018.9	9528.51	2848.71	694.591	2463.04	3140.92	3416.66	2397.27	2484.16	6286.84	16815.2	3893.76	4112.98	8807.9	3245.26	1209.94	9106.03	3892.46	1666.68	4739.58	11913.3	4647.72	2376.77	9010.89	5707.7	11686.9	3938.41	6246.26	12179.2	8877.14	9076.22	33616.2	13650.4	16111.1	8452.66	78.1602
7453	WARS	NM_004184 /// NM_173701 /// NM_213645 /// NM_213646	436.106	386.785	333.158	498.906	4987.71	3576.22	1135.68	826.861	232.211	228.937	426.246	194.419	146.544	303.681	285.127	262.292	237.197	248.288	200.073	1191.37	201.061	232.396	485.248	303.918	119.331	324.424	239.118	108.524	1100.54	386.046	301.993	288.245	843.595	294.517	229.633	552.964	306.165	569.317	1194	496.34	185.26	361.45	238.181	593.025	149.468
7458	EIF4H	NM_022170 /// NM_031992	2329.99	2503.41	1590.54	2177.69	7577.42	2769.77	2080.86	1949.47	3290.66	3030.46	2603.33	2717.96	2366.95	2919.91	2936.73	2874.25	2494.84	2636.63	2134.07	4210.28	3253.2	2567.75	2764.11	3844.4	2173.33	2804.97	2014.17	1881.17	1812.48	2163.15	2539.55	1468.81	3626.99	1967.09	2655.09	1007.42	2887.81	1712.21	3594.67	1938.18	1805.51	2064.8	2344.63	2606.67	38.8511
7494	XBP1	NM_001079539 /// NM_005080	878.95	1038.54	1146.98	939.532	1058.3	1496.93	568.023	1148.14	1673.23	1809.08	5044.75	332.566	345.848	317.861	307.109	388.984	307.558	404.346	4929.73	2277.68	832.846	941.327	1818.59	885.882	347.475	792.032	828.119	4281.08	2436.22	1148.76	482.13	2612.64	1990.56	2395.54	931.721	288.576	1091.63	1285.15	1568.55	1272.5	1208.26	1883.2	1102.5	1368.36	82.81
7514	XPO1	NM_003400	1703.18	1340.8	1139.88	4013.18	6251.56	2252.92	2018.4	2719.52	3218.09	1928.85	1921.3	1507.53	1858.86	1826.93	2303.37	1914.51	1523.13	1708.59	2187.54	2388.65	1968.28	1668.76	2713.67	1115.81	2552.55	1313.61	929.425	822.014	1606.36	1560.69	1434.1	1877.01	1783.02	1290.39	2553.52	1671.34	3197.48	819.013	3856.45	2137.43	2302.66	2258.39	2081.22	2075.35	46.3924
7520	XRCC5	NM_021141	1395.25	1077.99	1334.66	1958.63	4435.46	2007.85	3366.3	2394.93	2381.08	2593.06	2004.4	1048.74	1216.04	1638.29	1204.96	1303.64	1194.58	1285.53	1666.65	2608.72	2209.38	1451.43	1554.1	1880.48	1256.86	1363	1152.33	1161.77	1385.53	1415.13	1047.31	1424.95	1354.08	1259.64	1635.82	1091.61	1893.03	1078	2457.33	1959.31	1393.39	1862.33	1838.86	1703.31	39.5268
7528	YY1	NM_003403	771.974	567.179	392.015	1029.81	2040.66	1043.11	1658.59	1127.3	1194.17	1094.54	764.167	441.645	469.003	458.581	552.011	435.259	445.129	501.302	748.629	1041.13	579.22	880.174	1153.09	638.683	947.274	418.936	517.863	527.796	462.219	566.481	517.799	865.792	753.505	392.199	858.269	575.756	1048.56	592.859	974.402	1326.25	738.484	692.396	1025.83	786.745	44.9703
7529	YWHAB	NM_003404 /// NM_139323	2893.16	2481.39	2037.41	3659.7	6816.07	5409.58	6190.96	4585.69	3832.54	2898.38	1955.47	2698.12	2219.45	5129.14	5578.7	2388.41	3815.5	3904.71	2425.94	2191.41	2810.97	4315.8	2311.97	2656.06	2860.31	1476.58	1874.39	1000.3	2029.82	2551.31	1259.32	1215.16	2235.12	1497.68	2992.11	945.638	3144.49	1338.4	3354.81	4110.3	2345.32	2452.73	3642.84	2965.89	46.7781
7531	YWHAE	NM_006761 /// NR_024058	1582.54	1367.3	639.944	178.769	516.643	765.857	428.238	758.506	559.98	658.858	796.289	1902.46	1761.32	2052.92	2403.85	2072.34	1976.34	2468.8	962.351	1922.34	987.509	1300.71	1586.56	990.553	544.349	1779.26	1379.28	915.342	1116.01	952.973	2044.39	268.683	1478.78	1055.83	1129.54	2019.74	564.024	961.067	913.867	514.551	1618.56	1615.02	1317.1	1228.59	49.0776
7533	YWHAH	NM_003405	617.842	447.271	434.137	243.463	262.272	772.867	769.904	639.912	463.927	483.133	663.573	1779.9	2417.17	5187.41	4000.94	2229.22	4191.34	1798.74	373.232	1154.55	522.934	926.751	596.874	521.708	217.44	659.156	503.196	584.374	751.239	597.107	467.645	641.01	581.506	717.911	422.133	282.927	630.837	603.223	609.725	768.632	973.487	802.404	455.279	994.612	108.646
7534	YWHAZ	NM_001135699 /// NM_001135700 /// NM_001135701 /// NM_001135702 /// NM_003406 /// NM_145690	2871.96	1753.69	1673.99	3138.1	6098.93	3986.37	6962.75	4147.59	5164.98	7744.91	2470.31	2683.9	2083.28	4385.32	4783.22	2683.52	3360.59	2875.42	2384.45	3692.52	6805.33	4724.65	2376.56	6595.46	2964.6	1525.18	1548.8	653.461	2002.71	2477.23	744.539	1568.7	2670.02	1516.55	3330.88	2044.05	3222.38	1149.73	3764.94	4189.11	3176.1	2600.08	3892.85	3267.2	52.0055
7536	SF1	NM_004630 /// NM_201995 /// NM_201997 /// NM_201998	535.111	678.469	658.091	1142.32	1504	985.954	2132.22	1649.63	2763.55	3220.51	999.926	659.657	1145.82	588.679	392.369	479.299	454.026	462.627	1242.93	651.013	632.99	265.577	1176.76	465.302	525.727	449.106	449.679	465.402	559.208	978.682	441.886	290.223	726.679	803.873	549.017	701.709	1062.9	617.09	958.041	1034.93	919.593	810.441	516.848	877.857	69.1607
7553	ZNF7	NM_003416	222.906	114.636	105.083	338.488	246.498	112.108	100.797	209.35	261.49	199.158	205.861	119.153	144.722	151.881	173.845	114.626	146.093	157.337	201.049	248.803	205.174	179.121	190.433	113.732	254.915	134.845	135.894	179.535	183.524	190.29	198.506	281.71	218.509	229.433	245.278	271.095	198.192	111.017	227.245	149.449	123.279	203.652	241.717	186.987	30.1333
7555	CNBP	NM_001127192 /// NM_001127193 /// NM_001127194 /// NM_001127195 /// NM_001127196 /// NM_003418	4931.28	3429.43	1609.96	4378.44	8917.94	5237.08	7095.64	4651.91	5517.4	8836.43	2885.44	1428.93	1739.05	2034.5	2916.9	1962.66	1624.29	3419.55	3435.27	5983.37	4307.32	3410.19	3988.05	3516.76	2977.04	4104.48	2081.96	3538.3	2435.74	2769.03	9718.09	2777.31	1987.63	2762.18	4399.77	2194.5	3046.91	1498.04	4093.8	4503.42	3557.55	3254.67	4947.68	3811.77	51.3944
7570	ZNF22	NM_006963	523.69	198.624	250.015	511.144	469.091	318.593	313.345	670.582	561.495	1313.64	626.495	225.32	260.74	338.391	292.734	341.626	225.989	350.444	627.874	580.888	285.682	182.477	493.183	166.785	309.454	342.787	295.43	377.87	192.74	560.984	288.159	343.008	493.187	375.742	355.91	129.623	674.302	345.747	490.058	540.68	605.772	586.619	342.314	413.47	49.7201
7572	ZNF24	NM_006965	396.743	268.547	212.855	380.294	562.887	450.145	1295.13	601.046	756.044	1206.99	306.673	405.889	375.784	393.443	529.544	381.201	280.932	666.203	498.635	828.766	328.23	238.712	539.372	206.587	392.249	271.416	260.163	185.741	296.364	330.319	240.582	173.161	353.532	336.267	422.67	263.17	363.371	131.886	421.728	423.243	357.181	329.268	358.206	419.097	56.5808
7580	ZNF32	NM_001005368 /// NM_006973	338.934	160.796	204.586	202.138	350.276	129.762	181.497	218.842	398.885	350.301	149.644	261.032	240.336	379.06	334.232	296.924	271.406	409.08	312.047	230.733	212.641	164.477	236.306	165.474	321.756	422.176	313.034	149.589	263.217	240.268	817.844	150.083	161.995	489.68	261.073	135.19	293.396	241.554	271.812	122.408	403.244	365.683	312.012	277.568	44.8768
7644	ZNF91	NM_003430	1806.12	265.309	509.998	388.372	387.367	522.715	895.54	1211.55	1226	1675.21	688.531	1991.01	1597.99	2537.72	2391.69	1047.52	1503.08	1834.61	1195.67	477.77	919.81	792.121	846.838	364.2	954.831	1328.53	904.572	374.009	396.669	563.369	1690.15	187.3	2213.99	465.526	924.773	269.164	147.051	205.033	427.389	1023.31	897.772	595.489	2535.85	1004.22	67.2748
7705	ZNF146	NM_001099638 /// NM_001099639 /// NM_007145	636.955	528.313	516.987	1252.22	1396.22	812.328	426.308	922.008	1231.03	899.383	605.5	380.105	432.705	626.497	703.56	462.315	403.308	827.159	1210.82	1893.69	744.755	748.767	811.225	428.481	1007.38	415.844	424.574	310.023	520.303	602.058	646.611	675.636	696.749	597.916	1027.6	245.51	1107.56	358.09	1210.28	560.549	1103.98	1162.64	887.228	754.911	45.9721
7707	ZNF148	NM_021964	707.602	227.506	250.298	519.678	413.433	574.919	1835.79	801.742	1086.96	1392.97	333.608	551.321	600.995	662.755	543.099	559.602	502.791	474.125	501.76	510.627	484.503	525.879	2015.58	290.701	963.566	353.421	401.794	260.726	281.079	363.591	376.886	180.072	337.77	324.9	587.558	413.695	259.519	544.512	392.287	514.141	776.93	593.524	680.978	580.818	65.581
7716	VEZF1	NM_007146	562.681	483.801	332.329	371.266	1062.94	578.594	1148.83	858.894	723.867	813.182	369.453	413.423	349.306	366.068	457.685	503.888	300.67	738.061	698.139	970.932	365.93	528.245	926.249	265.747	403.833	498.075	425.118	184.164	576.902	354.021	776.807	412.358	388.683	445.04	567.926	292.556	763.346	418.719	479.95	637.581	1031.51	697.764	647.689	562.61	41.676
7756	ZNF207	NM_001032293 /// NM_001098507 /// NM_003457	1387.09	1189.59	1366.45	1997.39	2964.78	2575.2	2036.13	1818.69	2455.88	4040.56	2426.25	1026.95	846.738	1094.15	1076.55	1142.2	1018.74	1009.75	1437.5	2234.5	2820.8	1131.32	1664.72	2133.55	1471.25	1111.1	1013.89	1070.23	1347.74	1514.18	1182.72	1464.78	1911.36	1116.01	1389.78	1530.2	2198.32	1177.78	2273.85	1918.52	1328.33	1580.34	1642.67	1654.38	39.7495
7763	ZFAND5	NM_001102420 /// NM_001102421 /// NM_006007	4045.44	5569.02	1650.45	1408.17	6006.5	4915.56	4681.98	2608.21	3227.3	3610.41	2484.13	2288.4	2585.53	2849.13	2836.71	2157.21	2137.55	2599.43	2804.98	5357.43	2167.2	1685.99	3249.51	3190.73	638.223	2277.01	2221.08	2415.03	1655.67	1201.63	3944.32	1770.49	2496.51	1776.8	1561.97	2409.76	1671.97	885.162	3415.34	7494.31	2597.32	2631.77	1571.2	2808.2	50.6326
7803	PTP4A1	NM_003463	585.377	1772.93	374.505	305.718	940.934	656.58	1105.96	596.825	1507.49	1543.26	678.217	347.789	335.097	629.439	539.707	595.9	479.103	762.041	580.108	1493.37	551.898	2161.2	979.191	582.326	261.739	387.062	696.743	1855.88	463.79	251.423	2494.31	880.397	715.592	461.562	494.332	295.112	505.724	297.804	402.107	522.243	854.231	715.881	413.437	769.17	69.1668
7812	CSDE1	NM_001007553 /// NM_001130523 /// NM_007158	4418.56	2378.38	1739.77	2074.04	3725.41	2391.04	2493.48	2653.09	2964.04	4445.66	2111.44	1979.13	2009.47	2338.94	2237.42	1954.47	1966.48	2587.42	3602.4	2909.48	2862.03	2317.94	2902.28	2380.24	2247.24	3472.72	1714.71	946.278	1714.72	1820.28	7241.43	1426.75	1707.91	2394.14	3210.23	2386.48	2779.53	1715.39	2220.17	4236.03	3751.36	2141.12	2587.64	2631.55	40.504
7846	TUBA1A	NM_006009	4540.79	6501.54	2132.9	4102.37	11751.9	9378.73	15734.2	6220.4	4328.15	4754.6	3774.66	8654.43	6658.09	12811.2	15986.6	11339.4	10912.2	24174.9	9011.06	4037.42	3661.56	7011.35	7850.54	3367.96	10611.2	2920.68	1060.46	501.266	11581.3	1322.68	1193.75	6287.68	2198.25	3042.84	7020.65	1859.93	6822.28	764.405	4937.69	10661.7	14586	7936.53	8533.76	7035.82	70.3009
7874	USP7	NM_003470	495.896	432.204	300.648	994.468	1475.6	716.588	1191.23	823.93	1368.15	1435.45	550.597	386.978	586.396	769.657	736.023	467.206	439.682	596.223	786.695	553.95	808.579	629.973	847.674	602.953	806.221	304.767	259.059	178.83	409.143	520.659	412.65	355.45	398.324	439.392	879.346	536.162	811.711	157.28	818.472	1472.03	594.298	568.846	598.251	663.201	50.0166
7879	RAB7A	NM_004637	1278.33	904.437	542.593	596.685	2307.61	1397.98	2724.87	1322.31	980.153	752.925	737.607	1099.62	895.557	1163.49	1395.86	1243.68	1035.19	1404.96	926.873	1468.16	982.877	1328.11	1056.06	1187.65	829.466	1130.93	946.76	1003.25	902.734	851.9	1302.76	821.822	1223.2	753.34	1228.96	590.114	821.732	763.295	1089.58	1554.5	1141.97	986.102	1143.13	1112.07	36.1151
7884	SLBP	NM_006527	659.21	553.054	372.537	729.311	1202.35	1074.23	2257	914.755	1223.01	1622.04	936.456	551.443	455.885	820.429	987.157	574.997	608.514	551.03	370.014	982.642	728.958	550.344	562.066	657.396	580.233	251.482	490.732	493.923	539.831	600.073	208.785	258.305	768.109	504.956	736.895	1364.14	804.36	400.294	1017.07	723.384	565.862	716.101	876.276	740.596	51.3344
7905	REEP5	NM_005669	1914.16	1710.2	1166.88	1268.47	2549.53	2246.36	1926.03	1469.49	999.127	2348.05	1117.37	1754.46	958.091	3055.13	2939.8	1754.66	2307.18	2116.27	2219.42	1429.5	1337.48	1253.95	2203.81	1163.39	1579.25	1764.35	1492.36	1032.55	1471.68	915.936	1323.38	1736.28	1659.43	1434.84	1830.44	665.751	884.543	1587.4	1228.27	674.608	849.56	1116.84	2123.55	1594.88	35.9064
7913	DEK	NM_001134709 /// NM_003472	1627.66	705.736	802.775	2438.45	5150.56	2892.27	2818.65	2326.81	3178.48	2123.84	1123.98	469.823	768.849	771.031	811.271	805.222	497.832	846.477	1833.1	3138.13	1397.58	1977.66	1780.4	833.532	1924.28	1008.77	687.452	635.987	1092.88	956.811	1406.22	2183.65	1128.41	748.06	1939.04	290.376	2339.84	1050.95	2508.05	1769.9	1777.94	1518.89	1823.54	1579.33	60.3486
7917	BAT3	NM_001098534 /// NM_004639 /// NM_080702 /// NM_080703	1077.66	1742.42	882.911	1251.61	1996.03	1636.91	2332.69	1509.33	1283.52	1192	1128.04	960.789	1023.74	1258.29	907.53	903.997	1124.64	888.321	862.703	1654.17	1137.64	1610.47	1029.67	2031.55	567.256	1315.11	1027.95	931.185	1479.72	1221.24	1873.31	380.871	1504.7	1096.85	1151.29	4393.45	1156.22	1109.12	1386.32	5770.97	1008.02	1178.47	1858.05	1438.06	63.663
7919	BAT1	NM_004640 /// NM_080598	2327.22	2839.78	1708.59	2256.61	3735.02	2718.25	3792	4440.48	4796.47	4092.77	2635.11	1990.46	3646	2057.09	1991.4	1863.39	1776.07	2418.9	2646.46	4507.96	2197.01	2803.09	3009.63	2143.07	1603.08	2720.98	1940.14	1549.01	2402.17	3475.81	2255.7	839.52	2297.22	2517.51	2482.73	1977.47	1709.57	1922.74	3289.57	3871.31	3986.01	4167.5	2498.54	2695.34	34.4584
7965	AIMP2	NM_006303	530.045	527.831	276.776	663.275	1073.13	803.871	155.382	429.562	318.986	401.262	419.872	248.715	194.86	434.554	424.579	243.557	272.07	379.329	526.459	767.432	938.474	1032.02	545.557	1103.9	467.692	798.835	624.704	864.265	579.667	212.755	2816.19	349.893	503.074	390.928	538.631	1451.49	943.023	308.656	801.275	411.406	570.347	669.11	714.934	621.59	71.4888
7979	SHFM1	NM_006304	963.374	831.326	1099.36	569.523	696.459	914.473	328.147	473.934	943.889	4371.12	814.001	503.855	398.702	634.908	604.91	460.688	490.478	529.08	841.639	1664.53	2031.94	1067.7	1392.47	1327.5	803.745	783.839	581.832	1105.02	1346.78	599.142	1103.8	505.664	1414.07	1351.58	1388.79	1626.73	3070.34	591.551	861.934	303.386	896.812	1885.73	1628.25	1065.19	70.2721
7994	MYST3	NM_001099412 /// NM_001099413 /// NM_006766	293.71	221.419	289.759	411.847	248.327	277.019	3126.07	917.645	1780.19	2379.84	322.06	231.825	386.831	295.074	300.882	209.795	223.087	329.461	509.724	317.353	300.065	196.757	335.533	177.808	366.428	165.678	175.023	121.42	300.753	352.16	212.217	117.445	374.952	206.637	377.112	294.286	343.386	192.348	253.808	744.138	312.282	322.413	315.74	456.519	127.816
8019	BRD3	NM_007371	588.104	1120.87	580.633	588.436	1104.6	839.94	1366.3	845.282	701.714	636.809	454.501	870.992	1077.22	1026.48	799.523	901.099	833.912	790.403	821.951	1004.37	532.511	679.215	864.602	550.511	807.018	586.287	447.453	400.471	625.927	550.354	741.124	421.474	525.861	610.962	721.405	423.465	880.011	622.926	751.006	664.528	897.255	731.803	765.911	738.493	28.7397
8027	STAM	NM_003473	345.693	463.121	212.353	359.775	553.037	267.236	246.938	285.595	1374.26	588.245	342.781	434.065	525.476	715.403	837.645	633.362	575.756	837.753	364.059	503.458	334.293	255.721	331.993	380.733	414.311	362.228	286.229	175.579	360.828	250.786	346.108	462.52	371.346	278.351	479.768	212.807	584.413	151.177	345.668	587.854	347.647	403.616	440.176	433.26	50.1113
8031	NCOA4	NM_001145260 /// NM_001145261 /// NM_001145262 /// NM_001145263 /// NM_005437	7108.96	3110.52	2750.61	4800.8	14334.9	12765.8	18314.4	9406.27	3698.84	3131.83	4115.43	1873.75	1587.6	2599.83	2981.34	2712.05	2148.46	3585.04	4823.2	2856.53	4735.55	6044.36	3602.86	4216.37	4797.95	4253.6	3721.3	4278.73	3582.28	3127.31	3990.45	4126.61	3488.43	3033.43	5049.09	1107.2	4348.18	1534.83	7032.49	42502.8	6879.28	2831.74	5361.56	5636.11	118.186
8034	SLC25A16	NM_152707	344.042	194.423	449.89	271.589	192.072	238.338	296.098	326.887	352.942	425.404	356.353	286.386	344.991	252.097	210.99	260.024	238.686	280.131	227.147	220.797	303.778	352.576	334.279	181.949	163.403	241.787	337.854	278.076	271.417	215.223	347.32	214.816	295.985	278.931	267.465	172.831	238.75	240.246	257.742	157.032	345.116	289.421	223.668	273.929	24.5115
8036	SHOC2	NM_007373	1032.11	345.703	575.084	1258.13	1654.79	1287.75	3255.69	1498.12	1093.56	1252.51	715.873	635	733.609	1075.92	1001.1	733.239	822.563	933.482	659.335	1077.45	943.926	1045.82	1254.04	661.19	621.735	603.274	547.446	356.84	592.582	778.565	558.533	536.282	555.679	589.865	1154.79	1167.21	819.29	500.7	1072.13	2257.48	885.703	850.375	766.858	947.938	54.2423
8050	PDHX	NM_001135024 /// NM_003477	795.625	721.916	218.873	421.392	568.598	403.369	193.561	250.318	478.092	397.32	261.613	585.126	527.854	817.422	879.718	608.529	700.377	717.739	530.577	560.585	440.342	428.068	405.861	328.074	496.281	1097.22	375.136	317.547	334.939	244.787	1863.03	372.508	554.485	366.396	495.203	738.468	428.651	284.373	380.854	180.319	442.085	449.304	582.683	517.331	55.6544
8073	PTP4A2	NM_080391 /// NM_080392	4395.67	1492.42	2302.01	3220.11	7413.7	6389.95	7148.27	5689.41	5247.79	6407.5	3607.77	2467.54	1062.3	2096.99	3080.57	2622.23	1936.81	5081.36	2790.66	4909.85	1917.44	3326.51	2586.12	1471.3	1045.01	2413.98	1262.38	1506.73	2168.78	2615.91	3460.48	2098.32	2017.84	2650.95	1752.71	2527.12	5312.92	1782.49	3697.03	5902.93	3817.04	2021.55	2150.53	3229.51	53.4436
8079	MLF2	NM_005439 /// NR_026581	997.199	1949.54	589.058	653.148	923.406	773.177	2897.97	852.989	937.041	819.747	737.205	2380.85	1780.59	1980.46	1555.99	1823.09	1996.48	1289.65	931.975	1074.27	913.993	851.924	952.239	1740.84	529.228	1277.27	1355.68	2133.41	790.994	817.835	1104.59	506.584	979.766	814.817	881.297	1055.29	852.955	964.967	945.612	1395.82	1662.96	1127.54	947.694	1198.77	44.8556
8087	FXR1	NM_001013438 /// NM_001013439 /// NM_005087	1007.06	718.984	289.863	901.751	1491.69	926.697	804.217	731.535	1049.03	1300.36	674.916	394.061	353.029	533.131	673.73	549.839	344.543	919.506	684.33	1903.21	610.67	396.128	1147.96	411.394	808.956	1042.54	361.848	404.099	445.012	472.905	3582.9	488.696	480.242	394.783	733.925	2853.22	568.765	221.693	808.039	813.654	627.728	688.212	804.165	823.698	77.1463
8099	CDK2AP1	NM_004642	2952.75	2063.27	1700.49	667.769	6498.86	2340.57	811.359	1356.43	538.133	493.268	1486.5	2448.86	1651.08	3039.4	4626.63	3229.83	2394.57	5313.86	3374.45	4682.7	2546.71	2334.91	2549.47	3120.5	5271.3	1671.62	1286.93	811.759	1664.87	887.795	1684.06	2073.78	1197.05	1615.49	2992.76	1794.86	3280.41	1093.11	2158.04	1504.31	2683.61	3783.66	3735.77	2404.97	57.3809
8100	IFT88	NM_006531 /// NM_175605	255.297	264.5	348.738	468.307	287.853	211.51	246.446	239.586	332.551	265.319	250.25	570.375	353.013	361.636	426.299	532.069	344.711	510.508	511.054	290.301	275.028	363.905	620.59	225.38	701.124	385.869	726.456	316.142	1001.29	296.707	334.841	325.565	207.29	417.248	301.499	2079.62	326.479	509.616	229.268	207.38	246.219	449.286	206.046	414.492	74.1629
8106	PABPN1	NM_004643	765.437	756.691	713.618	826.356	1302.96	1324.12	1257.15	1008.69	1091.43	949.413	1139.67	1253.18	1645.95	1181.54	1135.49	802.137	1057.99	962.379	982.898	796.688	947.146	491.625	659.325	880.976	608.189	877.028	874.489	729.267	710.848	1033.68	729.115	456.409	866.576	837.681	728.696	1737.21	1090.69	839.579	1014.66	925.507	1056.56	1038.84	734.063	949.347	27.7118
8125	ANP32A	NM_006305	603.588	281.839	238.275	631.488	1617.66	1099.93	3005.77	1306.41	1096.9	623.304	690.148	776.693	962.287	654.424	655.603	774.848	531.639	796.967	578.022	502.511	345.389	370.856	755.256	370.588	382.952	656.134	501.86	480.859	376.283	657.657	308.967	227.093	420.455	558.588	522.391	165.122	897.119	213.54	869.181	914.166	730.374	642.34	328.683	677.306	69.5954
8204	NRIP1	NM_003489	2285.27	303.83	291.08	368.022	808.669	645.641	205.247	558.474	638.164	995.605	599.074	334.09	836.736	604.879	703.786	361.26	397.716	467.592	844.007	624.342	785.228	976.905	2452.19	229.793	737.236	263.531	489.003	391.147	260.845	277.127	701.882	742.769	877.62	438.74	679.929	301.052	589.573	121.963	344.771	1512.34	652.455	1121.94	1292.97	677.082	71.1904
8225	GTPBP6	NM_012227	279.903	489.151	328.218	649.221	701.276	470.275	134.183	348.626	623.664	439.182	440.998	316.834	353.867	363.335	285.575	315.065	341.06	314.952	361.427	360.155	335.213	319.205	176.31	305.617	350.168	406.121	492.528	488.373	413.048	523.903	559.626	323.033	304.283	399.208	235.318	185.808	480.451	608.467	506.531	335.106	326.628	329.456	226.341	384.83	32.8234
8237	USP11	NM_004651	472.335	1788.76	679.852	652.839	578.654	344.252	519.131	619.202	687.732	1364.35	468.27	3540.91	2539.63	3786.09	2718.81	2221.47	3343.91	2597.6	528.606	2091.35	290.284	257.834	846.43	835.044	276.567	802.493	637.346	243.878	910.33	690.912	266.077	132.719	533.731	806.375	382.328	1026.36	849.447	1349.05	739.028	571.532	1251.76	891.57	468.088	1083.79	87.7305
8239	USP9X	NM_001039590 /// NM_001039591	1304.31	951.528	504.167	1114.91	1340.47	953.28	2116.08	1226.87	1266.02	1715.93	560.57	730.367	770.923	1129.27	1469.05	624.961	761.179	1457.43	1202.26	1619.17	1027.04	1456.61	1218.76	626.467	1405.3	885.268	730.197	628.399	774.861	632.971	1292.97	868.131	1762.37	626.864	1062.13	765.351	1029.73	308.48	943.41	2602.5	1264	1024.52	1231.9	1092.72	40.9177
8349	HIST2H2BE	NM_003528	247.756	314.775	340.854	291.64	1042.81	662.348	907.369	962.043	333.042	479.542	1234.18	485.164	531.676	374.919	495.677	536.479	451.118	640.642	828.331	382.827	1002.45	251.973	590.498	435.633	371.111	1189.74	371.979	276.239	589.5	247.145	1003.65	351.012	1484.09	1764.09	460.221	332.244	499.93	504.99	2140.12	952.707	311.81	402.739	294.089	636.538	66.8539
8405	SPOP	NM_001007226 /// NM_001007227 /// NM_001007228 /// NM_001007229 /// NM_001007230 /// NM_003563	680.19	466.675	418.331	449.107	801.321	700.425	1004.37	949.875	739.11	872.539	610.032	829.64	1004.67	807.573	1028.99	762.957	668.133	784.564	577.867	765.607	500.707	781.36	922.807	771.478	495.762	667.633	520.788	558.369	591.507	730.199	907.95	254.438	530.046	941.259	692.59	393.102	809.09	452.363	743.242	1253.68	2631.41	777.629	562.871	753.773	47.1581
8409	UXT	NM_004182 /// NM_153477	1122.97	2273.02	882.623	2740.36	3544.75	2293.63	1870.12	2543.29	3578.54	6311.11	1885.16	346.901	299.813	673.885	623.687	435.392	447.951	720.096	1423.2	1966.75	1818.38	1592.19	1370.07	2202.62	1163.68	801.833	944.67	1273.01	1461.9	1654.4	816.092	837.139	1202.6	1033.11	1186.96	493.7	2544.81	491.351	1901.81	2591.82	1317.26	1342.46	1638.53	1573.57	69.9193
8428	STK24	NM_001032296 /// NM_003576	815.311	541.837	717.407	1224.46	2804.74	1765.41	2239.32	1403.06	1499.15	1336.65	626.308	482.008	381.64	666.624	781.463	449.143	514.248	373.688	1143.35	1044	1656.32	2091.78	1678.76	2526.8	1998.06	657.361	672.965	397.305	888.141	663.535	477.397	1556.23	792.68	512.02	1280.26	483.917	1298	439.546	1188.06	1271.83	671.127	780.195	1264.78	1071.09	57.6885
8439	NSMAF	NM_001144772 /// NM_003580	825.195	478.025	437.657	1236.33	3853.59	1091	1480.87	964.54	1245.76	725.712	510.697	458.216	391.612	370.067	550.37	351.078	271.969	382.128	744.992	876.054	530.561	605.401	536.899	550.906	650.699	384.027	229.351	118.897	514.612	634.49	440.004	652.918	404.486	327.136	1298.55	153.895	846.316	136.066	1503.05	951.186	546.213	592.568	817.524	713.293	84.0206
8443	GNPAT	NM_014236	1047.98	853.712	465.254	1072.56	1265.39	932.476	674.633	734.709	915.625	749.29	696.923	585.837	564.808	824.848	862.668	637.332	576.474	851.316	693.128	699.308	725.636	861.768	818.63	645.189	1000.47	925.795	543.272	235.227	779.792	567.553	1829.13	966.7	623.568	619.283	965.497	1273.69	632.193	426.214	794.812	530.621	978.292	747.256	1879.41	815.681	38.2986
8446	DUSP11	NM_003584	433.003	288.985	466.875	650.547	475.86	445.828	980.941	595.187	1101.38	1595.04	615.993	314.236	402.96	401.139	378.87	327.965	291.702	305.32	519.693	783.168	990.62	619.034	662.559	740.242	891.983	373.399	384.239	277.2	540.245	571.163	395.573	287.814	462.271	531.548	791.128	467.465	845.559	306.124	684.937	459.303	421.226	600.1	753.185	568.177	46.6179
8449	DHX16	NM_001164239 /// NM_003587	326.496	618.826	431.168	1084.75	784.078	903.271	808.397	544.023	796.426	436.532	355.765	259.301	410.879	335.503	252.682	271.448	278.634	229.135	447.868	270.616	442.304	374.287	329.212	355.822	427.696	352.016	323.874	282.092	527.008	469.088	362.596	467.003	398.521	437.078	313.109	997.844	438.924	365.191	644.907	420.493	298.442	440.703	385.281	458.123	44.5889
8452	CUL3	NM_003590	438.288	404.15	250.185	977.189	1171.44	481.503	1092.67	522.703	673.787	665.633	374.536	250.978	387.398	613.964	648.169	294.172	406.773	449.803	440.979	682.41	619.657	579.925	535.231	436.449	333.341	291.878	291.513	185.488	342.574	313.45	696.166	416.097	373.119	252.42	733.906	1729.69	607.682	210.456	616.468	838.041	301.094	353.798	719.822	535	55.0875
8454	CUL1	NM_003592	645.062	289.696	481.316	483.064	1117.11	724.002	396.535	595.074	717.863	728.413	537.894	429.486	476.063	746.848	661.463	414.871	504.73	483.366	421.98	1090.86	557.031	436.418	731.029	321.854	177.703	442.574	234.829	350.586	537.945	590.776	702.841	133.833	805.279	591.77	599.401	2256.51	413.052	124.236	730.41	372.508	794.703	544.057	608.077	581.468	58.019
8473	OGT	NM_181672 /// NM_181673	612.572	484.622	435.156	1623.9	3944.07	721.006	1727.43	1718.85	2179	1757.52	1422.45	632.978	917.566	924.897	1047.41	493.408	563.027	574.162	1036.08	1412.88	803.592	528.203	1228.26	242.404	1216.28	617.698	496.89	330.21	396.33	1038.52	473.356	755.867	468.481	641.65	1001.23	159.916	691.153	295.076	1959.07	2024.05	445.606	952.434	782.28	971.57	71.8944
8480	RAE1	NM_001015885 /// NM_003610	421.403	710.395	410.481	742.646	1058.27	766.542	655.533	746.277	770.991	1621.03	683.066	384.307	502.193	491.79	446.377	386.457	466.447	358.107	524.354	624.722	652.211	430.663	459.472	723.746	806.413	309.498	389.533	311.514	568.65	455.574	325.506	327.656	564.475	503.649	552.735	2697.81	853.581	427.154	720.093	735.82	495.589	532.452	506.727	630.742	63.216
8519	IFITM1	NM_003641	3176.68	2284.11	2771.92	2771.04	1234.08	1665.66	19369.9	10450.8	11131.9	14671.1	2441.62	1193.52	899.516	881.65	1427.77	1942.77	1093.15	2144.13	2212.02	1565.02	3349.51	2384.27	8929.94	1844.69	1314.67	3029.67	1837.36	3445.93	3199.29	5399.96	1639.44	3347.66	1718.99	2541.1	2524.21	1034.75	5231.81	2293.38	2759.18	13577	2906.53	4828.8	2916.25	3892.62	104.585
8520	HAT1	NM_001033085 /// NM_003642 /// NR_027862	622.626	264.506	206.522	765.716	1215.92	672.588	695.149	593.206	742.714	1101.33	521.112	146.72	107.315	216.767	335.996	215.586	127.427	425.657	573.113	1578.62	471.924	735.561	532.756	296.665	513.332	331.847	247.15	251.976	464.075	297.212	738.68	680.385	417.691	271.666	759.551	379.329	980.681	103.327	897.149	480.699	497.749	534.435	876.949	532.311	59.3192
8533	COPS3	NM_003653	521.139	464.165	232.725	699.314	1361.62	781.81	854.523	810.877	840.241	1155.29	786.529	409.682	329.932	687.569	604.301	397.97	463.219	551.086	373.919	818.083	625.587	549.74	449.526	571.565	401.037	481.734	272.885	281.229	426.915	347.597	1459.77	408.985	512.656	375.886	476.914	1427.71	711.219	285.797	699.312	1635.06	414.843	492.825	558.588	628.172	53.2082
8539	API5	NM_001142930 /// NM_001142931 /// NM_006595 /// NR_024625	256.862	113.693	140.462	168.761	370.107	180.854	220.247	269.165	361.646	471.386	258.505	178.189	204.114	287.244	289.284	204.272	201.052	304.614	165.472	315.131	258.44	229.948	367.028	268.362	145.503	165.764	184.239	160.733	138.932	191.624	137.336	112.885	242.606	159.522	359.297	191.717	183.068	102.639	291.078	217.573	209.054	280.827	301.772	229.326	35.5903
8545	CGGBP1	NM_001008390 /// NM_003663	650.88	430.208	470.141	980.092	527.852	1108.34	2096.92	959.616	1323.78	1725.62	1010.82	666.201	509.958	432.646	298.47	588.668	464.751	420.709	514.084	785.075	743.927	458.555	577.079	930.076	980.308	627.884	620.455	577.291	350.528	589.294	664.881	591.991	1037.47	314.009	367.25	955.992	950.315	265.559	603.918	1187.71	240.16	476.388	388.636	708.477	53.7493
8560	DEGS1	NM_003676 /// NM_144780	1255.99	356.318	176.385	684.754	1638.75	1085.7	1077	851.271	821.677	600.777	413.831	407.036	275.136	555.26	1076.01	603.019	453.326	1075.34	757.184	1911.69	1535.99	651.894	1167.53	616.072	2777.69	457.1	388.012	239.35	322.885	437.789	239.753	409.313	1136.91	458.727	6186.57	262.373	598.89	289.072	1361.03	777.39	1200.73	867.216	6017.14	1034.32	120.408
8562	DENR	NM_003677	1159.75	786.249	704.783	2011.22	3668.12	1060.84	641.852	976.308	1522.63	772.988	832.318	473.406	564.394	1033.83	1055.12	621.114	759.752	1253.5	1734.6	1200	1085.34	1254.01	1184.01	800.903	2008.91	419.681	532.195	357.653	979.352	534.536	707.197	2403.16	827.789	691.597	1386.3	443.303	1535.83	483.01	1574.74	1171.02	921.441	1079.5	1210.71	1079.65	56.7854
8565	YARS	NM_003680	520.536	1401.23	506.513	895.114	1068.36	1167.52	584.689	856.299	946.137	1747.21	1041.26	1214.93	956.815	1424	1180.88	836.83	1106.7	894.496	836.687	2291.6	1083.09	494.147	516.201	1179.96	1080.38	389.325	324.923	476.207	845.037	629.228	428.356	845.285	653.569	581.006	471.762	765.228	1711.45	504.16	936.428	1050.42	671.152	605.437	555.302	890.137	45.6027
8566	PDXK	NM_003681	1008.23	502.86	292.843	204.843	545.734	917.593	392.163	323.38	280.04	192.668	393.341	801.695	507.543	994.291	882.222	760.893	727.938	853.442	465.979	628.572	604.446	603.568	334.829	950.052	228.588	340.487	538.222	236.701	746.649	261.235	102.475	339.948	660.28	398.642	300.133	2752.88	570.52	208.201	342.027	381.747	306.942	368.473	446.601	551.161	76.4356
8569	MKNK1	NM_001135553 /// NM_003684 /// NM_198973 /// NR_024174 /// NR_024176	696.599	469.633	651.12	490.006	752.621	923.528	1890.02	898.438	796.459	656.541	683.565	391.846	559.261	433.4	415.439	331.471	393.453	340.057	633.426	215.919	566.666	486.91	352.931	678.203	559.796	716.745	351.254	449.271	553.515	751.381	726.415	1145.37	661.965	571.067	602.166	412.267	717.877	485.504	742.405	1301	486.086	485.207	507.212	626.373	46.1633
8570	KHSRP	NM_003685	170.6	258.039	111.976	192.095	130.516	190.133	146.309	236.447	229.299	178.5	229.147	261.663	331.115	196.993	186.701	176.924	217.813	167.147	253.68	235.114	173.244	242.511	193.626	218.834	252.357	157.506	157.074	166.164	164.8	238.656	164.811	140.149	207.296	160.406	195.77	408.265	205.22	172.143	239.957	205.576	395.003	239.303	181.607	208.849	28.8585
8574	AKR7A2	NM_003689	950.164	1233.41	466.713	551.772	1493.12	772.984	257.769	521.781	656.413	345.445	604.861	455.399	400.869	413.955	586.189	507.806	455.571	582.439	997.19	590.189	1021.87	772.567	549.016	1459.1	879.617	544.217	1534.16	1318.8	1047.21	461.685	816.29	831.661	489.6	801.688	694.36	719.529	919.116	718.099	828.082	662.801	646.088	824.43	1035.8	753.95	41.2142
8575	PRKRA	NM_001139517 /// NM_001139518 /// NM_003690	782.844	337.353	224.937	433.874	1430.09	349.874	272.668	384.731	668.383	842.063	446.344	356.214	411.71	569.277	666.294	429.89	399.789	611.501	541.365	1263.99	479.111	440.811	930.817	468.681	333.644	527.138	325.957	183.288	279.715	362.864	1319.86	282.692	295.626	410.292	652.667	978.608	495.302	218.774	596.826	296.535	564.117	680.974	809.686	543.19	53.7625
8602	NOP14	NM_003703	229.55	354.835	217.919	494.463	461.714	299.779	157.759	499.633	482.187	409.137	321.734	131.854	279.902	171.564	160.003	189.315	119.456	172.797	499.772	356.367	352.271	167.141	158.008	353.163	447.274	186.226	197.065	324.521	294.092	279.747	287.99	352.477	215.282	202.158	187.54	101.562	623.477	267.416	411.405	291.719	198.056	269.968	215.452	288.227	43.0021
8615	USO1	NM_003715	1052.31	497.475	284.048	809.853	1811.05	484.225	718.08	485.516	682.726	261.33	696.713	212.447	216.8	498.32	550.532	270.865	303.575	577.131	686.372	2026.8	949.709	561.623	1806.78	766.508	1044.4	879.434	377.224	428.325	339.841	339.163	2218.36	349.349	996.306	297.131	972.123	582.423	334.316	248.019	1120.67	211.73	949.564	792.78	1106.93	716.253	68.6883
8635	RNASET2	NM_003730	425.66	273.827	646.363	2889.35	9028.68	4154.05	10545.4	3493.29	2834.69	920.489	1577.99	483.35	126.951	267.691	606.821	516.473	291.593	639.444	644.093	153.171	643.314	690.871	1462.96	599.808	117.27	338.436	237.46	560.151	598.842	1678.85	109.157	481.122	494.825	743.422	477.359	180.636	714.419	866.273	2755.71	3422.56	239.042	2044.35	721.962	1411.59	151.656
8649	MAPKSP1	NM_021970 /// NR_024170	754.737	411.494	460.323	392.591	1083.13	1025.09	2069.76	705.213	653.068	1159.09	503.663	375.186	289.03	569.916	775.318	432.73	338.794	585.826	677.21	974.663	1072.18	1653.04	1220.08	734.889	816.904	394.935	506.467	189.823	426.507	398.192	429.746	324.591	640.395	547.516	1007.56	440.758	772.451	216.746	962.021	746.232	499.235	763.357	1284.2	704.294	54.5182
8655	DYNLL1	NM_001037494 /// NM_001037495 /// NM_003746	4863.84	3551.6	2146.76	1283	2934.78	3767.13	1171.73	2511.67	2020.48	1281.6	2293.8	5463.17	3110.18	7112.75	9151.45	5413.42	6499.52	8514.7	2831.02	3817.08	11625.9	8968.58	4916.34	8746.02	7927.3	2421.69	2812.94	2809.81	7117.64	1695.3	1072.18	3422.38	3488.89	2584.71	6000.71	5648.61	5445.26	1576.42	3893.3	8396.44	5175.51	4463.78	9578.11	4640.17	58.4391
8660	IRS2	NM_003749	3047.8	3617.79	409.783	225.679	956.204	2899.59	8998.09	1685.37	1979.07	2192.78	958.341	1481.68	1489.93	2132.57	2610.99	1820.57	1772.74	1838.29	1942.83	1338.58	575.151	1288.1	1400.91	594.823	1083.96	929.837	563.91	1142.97	1001.97	345.575	629.605	629.717	1728.71	1578.41	868.392	362.318	930.038	376.139	297.325	2405.66	1332.44	798.045	884.525	1515.05	93.4432
8661	EIF3A	NM_003750	1880.45	789.916	714.981	1142.66	2761.39	1580.75	799.967	1364.74	1761.92	1664.65	1079.24	392.923	443.37	655.445	671.557	423.462	405.275	956.612	1356.39	2474.94	1319.96	1070.8	1373.91	678.314	917.186	584.238	572.796	357.856	545.319	657.661	902.748	850.644	1161.16	923.844	1763.56	508.412	1472.76	356.98	1604.1	806.323	1160.65	1250.08	1982.58	1073.08	53.1431
8662	EIF3B	NM_001037283 /// NM_003751	923.06	1191.75	867.886	1268.27	2121.43	1066.13	380.256	807.09	1367.3	1119	1151.14	574.764	596.438	633.334	652.634	576.12	543.769	638.468	1311.56	1678.59	1251.54	841.878	606.863	1416	951.785	665.443	606.649	859.58	1073	854.445	889.825	643.061	915.783	1105.44	1095.3	1339.59	1064.36	641.104	1339.54	1247.36	1316.38	1096.55	1004.81	983.611	35.3672
8663	EIF3C	NM_001037808 /// NM_003752	2318.46	3787.63	1504.44	1852.04	5885.49	3604.04	862.294	1897.64	2137.8	1074.22	1669.37	1113.01	833.053	2056.18	2865.29	869.424	1447.52	2164.66	2294.49	4023.57	2456.26	2725.54	1860.57	3151.9	1524.65	948.704	1321.01	1362.62	2578.18	1064.55	2529.74	962.069	1400.91	1888.42	2639.24	1428.63	1224.43	1452.33	2298.65	1229.91	1149.65	1884.94	3762.37	2025.72	51.4192
8664	EIF3D	NM_003753	2049.47	1789.17	1946.32	3197.98	7982.33	3050.7	2952.35	3014.93	4977.12	5602.51	2594.31	693.085	879.512	1071.7	964.932	747.721	717.83	908.718	3284.08	3798.03	2635.66	2048.15	2336.46	3932.48	2021.06	1194.93	1279.2	1324.88	2304.79	2451.71	1270.72	1878.17	1607.85	1835.65	2605.99	1494.94	1682.09	1252.45	3546.14	3831.13	2711.07	2512.56	3202.37	2399.61	59.6208
8665	EIF3F	NM_003754	977.715	955.826	708.089	2622.97	3714.18	1875.46	841.404	1625.73	2017.37	2036.2	1104.43	277.01	268.429	452.144	460.683	292.185	380.003	514.186	931.235	1372.99	839.874	1207.52	960.43	1181.32	1044.56	544.532	534.039	733.434	817.122	992.104	1478.54	752.404	621.393	672.361	1242.36	831.149	1148.67	610.109	1550.11	1608.82	1235.86	992.671	1812.66	1089.31	61.4002
8666	EIF3G	NM_003755	1318.73	1828.69	896.476	2271.58	6268.26	4346.32	1497.48	2423.75	3486.2	2638.62	1268.78	276.131	430.796	626.329	693.897	538.224	388.59	869.136	1555.03	1967.1	1492.33	1394.01	1865.7	2009.53	1318.33	875.989	676.515	954.784	1470.35	1731.03	2458.27	1209.56	1173.94	1501.65	1472.87	2192.31	1705.98	1139.3	2500.75	1050.79	1685.56	1608.71	2643.98	1667.96	65.3383
8667	EIF3H	NM_003756	3354.62	3221.22	3038.23	11123.5	10946.6	8220.3	2886.07	5271.34	6794.52	9457.93	3779.58	1546.66	1339.98	2182.08	1883.1	1600.77	1637.26	2226.16	4630.58	5605.58	5523.91	3217.03	3809.03	3649.95	5899.93	2373.05	1786.02	1610.79	2577.77	3359.11	3858.2	4220.63	2190.72	2906.94	3733.15	2724.17	5603.55	1827.86	4823.08	6085.14	3840.77	3092.34	5296.49	4064.09	58.9296
8668	EIF3I	NM_003757	1501.91	1237.6	924.055	1017.25	3079.33	1434.52	643.267	1340.53	1516.54	2439.33	1620.08	752.79	593.598	997.541	873.722	1009.12	718.048	1024.54	1028.01	2557.65	1697.3	849.213	1267.03	2576.7	1227.76	1029.74	887.562	1383.26	1148.36	1052.37	2019.73	562.228	1125.46	988.308	1232.85	571.36	1358.94	651.266	1850.18	1151.34	1467.3	1367.7	1594.21	1287.66	43.9894
8669	EIF3J	NM_003758	603.85	332.423	268.456	393.632	746.966	530.705	261.044	383.134	540.866	467.763	457.179	326.213	282.272	493.628	504.487	478.538	363.402	581.47	549.675	1170.02	572.466	540.954	526.113	492.472	541.489	421.392	292.148	309.232	269.928	238.774	1124.63	442.826	482.008	273.269	524.013	301.552	672.02	219.939	568.193	1298.24	586.157	439.518	728.941	502.372	46.687
8675	STX16	NM_001001433 /// NM_001134772 /// NM_001134773 /// NM_003763	383.811	293.605	251.778	390.975	847.692	546.595	1689.73	701.877	1118.86	621.956	377.11	352.533	465.334	440.237	463.28	464.085	338.786	478.522	414.326	343.806	307.059	183.297	764.701	217.68	204.675	263.595	215.038	186.37	211.763	568.521	140.391	196.176	382.283	227.552	377.942	323.002	315.895	161.859	506.42	569.801	501.762	549.612	298.408	433.923	64.3173
8678	BECN1	NM_003766	731.294	469.657	419.264	571.399	1323.9	948.065	1542.43	880.8	857.356	1155.7	545.579	562.824	466.583	678.453	537.395	423.409	532.501	527.646	580.268	542.712	623.665	880.607	715.177	888.107	519.164	612.041	547.057	261.151	599.444	581.984	735.621	457.838	483.295	510.072	535.48	316.926	531.546	392.306	730.889	1796.84	510.268	609.074	694.605	670.474	45.3179
8682	PEA15	NM_003768	3210.03	1192.18	939.003	623.725	2147.6	1582.9	208.113	690.026	414.013	437.249	519.517	4536.46	3165.94	4850.81	5789.23	6161.48	4502.5	9136.91	1233.96	2193.48	1367.11	921.462	1220.16	2054.72	833.702	2324.5	1079.58	515.575	858.117	1581.29	857.778	1036.33	1445.27	1368.52	1453.45	1450.85	983.109	859.674	2767.73	407.782	3443.23	1522	1371.09	1982.75	92.9621
8683	SFRS9	NM_003769	1172.64	2282.23	1035.17	1759.99	3185.35	2209.11	2156.32	1845.34	2090.53	1576.4	1971.13	807.568	909.728	1183.46	1230.54	953.207	932.844	1275.24	1389.54	2019.85	1856.41	1397.1	1370.27	2681.86	989.862	674.923	1378.04	1399.8	1385.98	1274.95	432.274	1292.67	1548.85	1385.65	1179.49	1673.9	2753.26	1287.77	2191.9	1581.39	1165.34	1551.8	1404.63	1531.26	37.0548
8697	CDC23	NM_004661	628.796	1137.66	554.104	447.256	356.971	575.61	541.096	492.043	457.887	316.61	518.918	680.059	545.833	643.586	486.089	661.562	704.316	566.532	469.86	366.259	661.266	641.096	417.62	802.242	870.482	708.506	979.887	1386.67	768.565	483.696	627.785	306.006	519.268	644.195	395.399	520.273	546.228	785.983	558.944	442.585	544.965	537.991	404.232	597.789	34.9303
8703	B4GALT3	NM_003779	250.243	431.665	361.598	395.789	597.791	354.156	436.879	526.314	743.392	651.319	755.883	306.155	287.401	351.789	282.475	220.363	246.646	214.661	355.433	746.362	448.109	274.013	326.948	575.837	216.537	241.901	274.976	292.309	269.843	473.272	120.752	276.805	612.029	366.239	280.102	343.297	311.894	224.21	466.602	1349.34	217.559	279.052	338.062	397.582	54.2825
8721	EDF1	NM_003792 /// NM_153200	1292.14	1541.81	789.112	1892.82	4277.54	1571.47	825.958	1298.93	1798.61	1722.68	1031.89	580.075	905.885	1269.79	1528.97	660.446	914.343	1490.22	1560.6	2252.92	1969.6	3376.97	1211.3	2011.96	1492.09	762.8	1156.81	1331.98	1545.2	1069.94	1064.62	1669.84	930.459	1738.21	1638.06	756.64	1617.15	1183.71	2265.73	1499.65	1442.17	1741.09	2675.03	1519.93	45.8646
8723	SNX4	NM_003794	386.677	186.73	209.198	470.105	1079.81	409.871	146.791	285.092	382.364	357.459	293.28	227.869	280.148	442.147	379.182	354.305	277.084	410.987	505.996	380.511	240.514	345.632	363.317	220.051	307.944	232.093	457.497	348.9	288.988	207.746	282.428	469.07	471.223	291.241	354.179	294.818	508.376	412.226	515.38	385.575	201.781	377.062	295.295	356.673	41.344
8724	SNX3	NM_003795 /// NM_152827	4618.5	3523.33	1896.82	4832.19	10321.1	4486.61	3356	2956.8	2099.3	1723.58	2889.08	2787.76	2040.17	3944.97	4184.09	2989.64	3308.6	3017.18	2641.58	2999.9	3215.41	2099.72	2711.28	3665.98	2886.89	3076.03	2034.85	2053.98	2487.53	2047.76	4324.56	2819.32	2150.18	1628.71	2589.06	2066.12	3768.34	1952.06	4005.6	15983.8	2321.48	1998.04	3025.04	3384.39	71.4455
8729	GBF1	NM_004193	252.173	208.152	271.766	165.301	100.257	163.932	231.393	184.008	251.902	322.994	322.488	297.564	381.745	332.233	239.086	291.599	349.037	304.46	184.947	271.893	220.025	373.048	254.631	236.221	143.386	316.968	374.735	171.523	356.726	273.922	482.84	194.162	409.901	497.264	223.24	486.212	203.41	291.828	237.921	135.853	342.697	304.589	236.111	276.608	33.7016
8738	CRADD	NM_003805	280.651	341.507	421.424	307.146	206.031	199.605	389.919	222.244	249.61	291.077	332.892	331.452	303.245	253.277	251.795	297.508	310.702	265.717	213.932	480.06	342.108	413.821	321.227	398.569	491.946	600.582	429.755	521.168	379.784	255.898	546.997	325.142	290.293	399.653	189.762	453.148	258.657	205.385	244.779	298.31	324.601	254.054	149.774	326.633	31.4136
8761	PABPC4	NM_001135653 /// NM_001135654 /// NM_003819	1402.66	1875.58	1278.77	1967.72	3004.58	1876.15	585.085	1240.95	2130.71	1752.68	2954.9	591.304	479.236	576.352	704.752	622.803	521.468	675.506	851.35	3038.82	1047.09	920.329	1542.56	1343.6	513.872	2024.94	611.071	1424.17	1095.12	1356.42	4550.31	1218.32	1047.6	955.39	834.436	1778.73	754.162	920.254	1682.22	889.205	1535.41	1297.52	1055.3	1361.15	60.8008
8763	CD164	NM_001142401 /// NM_001142402 /// NM_001142403 /// NM_001142404 /// NM_006016	4334.91	864.687	897.631	1074.56	4323.54	1806.36	2184.61	2043.22	2166.4	1964.62	1760.08	479.881	304.172	490.099	814.618	878.081	412.865	1175.87	1744.47	2665.58	1083.75	3770.33	2674.1	1019.83	1141.43	1092.29	1945.45	1393.93	1840.6	1119.34	786.984	1769.75	2885.59	982.332	2001.53	1191.21	1417.85	1322.88	2299.2	1943.14	1183	1516.27	1555.89	1635.42	57.081
8766	RAB11A	NM_004663	1112.17	2020.12	1264	1508.03	2721.45	1614.32	3067.19	1406.03	1064.62	1414.63	836.554	761.187	769.191	1125.3	1231.42	1010.78	979.897	1130.14	1038.3	1672.77	4791.98	2537.1	1215.15	5592.44	1446.06	887.186	902.876	660.028	1491.82	817.97	660.133	1331.14	1657.29	1040.83	2055.07	1794.03	1470.88	812.818	1806.23	1092.8	976.49	1456.32	3203.93	1568.57	64.4971
8776	MTMR1	NM_003828	141.243	156.109	156.984	607.984	1556.33	184.895	571.026	534.557	551.864	342.357	215.816	222.14	249.371	274.911	356.368	246.18	222.396	210.729	267.681	197.769	378.636	174.794	251.707	381.377	375.692	137.991	110.12	126.195	199.696	299.603	136.984	174.766	559.627	141.793	366.631	143.388	416.106	136.432	798.784	316.732	135.927	153.502	304.718	313.672	79.7294
8780	RIOK3	NM_003831	647.413	245.732	331.636	761.476	1359.82	1029.97	1325.71	1015.26	949.673	1436.66	614.05	272.741	447.738	398.963	399.813	259.114	292.417	550.188	482.609	852.042	1417.44	1520.99	672.634	957.575	211.955	326.693	381.297	531.557	464.446	374.051	525.416	281.446	707.794	341.084	1027.84	437.315	352.784	255.302	590.546	11375.9	1061.38	644.62	881.607	907.317	184.688
8799	PEX11B	NM_003846	461.426	547.442	400.949	562.501	924.043	545.685	455.118	746.579	736.73	434.924	449.891	723.473	692.472	847.073	836.08	639.551	776.921	587.489	1055.35	258.279	610.235	516.689	621.995	1051.48	852.357	473.468	516.552	512.394	603.505	550.871	496.618	382.865	513.409	409.164	600.63	580.88	997.767	351.85	809.591	409.275	484.251	593.504	544.547	608.509	31.0914
8802	SUCLG1	NM_003849	3289.15	1646.88	1029.85	1153.69	3126.28	1807.09	900.185	1214.7	1258.11	1473.44	852.59	947.06	976.543	1596.01	1749.42	1036.77	1162.11	1675.2	1830.35	988.903	2942.71	3159.43	1327.36	3416.21	1863.67	3035.09	5950.92	2162.82	1098.2	810.119	4244.84	1248.18	997.797	1171.12	1435.42	838.628	1240.76	1044.71	1724.73	987.173	1211.56	1265.15	2206.78	1746.46	60.9116
8804	CREG1	NM_003851	4214.37	1897.56	1262.6	214.078	2516.79	3488.13	1062.55	1380.24	523.153	304.585	1863.18	842.341	442.611	876.395	1482.04	996.075	703.571	1469.47	2388.6	1135.82	1868.68	1735.79	2915.8	2040.35	6927.73	1459.94	1625.31	3304.97	1427.76	1029.49	1232.3	2192.16	2212.17	942.567	4786.27	902.85	947.797	1717.34	1270.58	9944.33	1301.56	1250.27	7061.18	2073.52	93.322
8805	TRIM24	NM_003852 /// NM_015905	233.118	372.024	208.276	279.241	357.284	351.434	335.437	270.96	321.05	325.367	446.698	250.96	188.475	308.413	334.099	217.799	219.039	247.927	421.716	235.295	297.433	276.08	313.089	194.911	257.378	253.088	186.83	230.484	270.444	185.513	306.397	304.725	271.712	254.682	270.725	785.997	575.719	102.756	270.478	484.982	503.595	292.531	252.009	303.864	38.7005
8813	DPM1	NM_003859	1529.15	1226.79	664.739	1858	2406.63	1165.67	1219.91	1181.59	2684.26	4060.31	1114.54	498.525	474.519	788.187	1146.61	567.285	558.886	828.764	1007.11	1765.01	1270.99	1502.66	1601.23	1034.23	1308.64	845.405	722.303	920.625	1131.54	839.697	1375.27	1808.84	1018.45	723.544	1740.55	1123.21	2309.98	522.887	1886.59	1240.17	1307.43	1325.27	1454.26	1296.75	51.6629
8815	BANF1	NM_001143985 /// NM_003860	849.496	1522.04	622.565	648.408	1146.67	1080.23	788.72	1188.99	1111.43	1339.42	1226.31	924.737	1077.06	1140.22	1179.85	1059.01	1001.27	1102.55	918.756	1354.26	1234.01	914.733	1890.25	1545.93	646.343	1534.47	878.539	1060.49	1266.71	1276.58	2606.75	213.985	883.887	1077.62	868.339	1347.56	904.722	897.522	1247.15	879.944	1654.5	1573.72	1389.66	1141.29	33.91
8824	CES2	NM_003869 /// NM_198061	430.241	984.423	312.111	132.992	133.448	400.772	157.971	245.224	236.057	225.039	187.978	346.095	549.121	447.369	305.275	317.76	362.376	302.447	379.195	193.663	1341.08	6351.52	233.865	3842.02	854.109	453.779	1969.45	3774.84	741.095	323.654	411.906	261.597	239.367	480.007	471.973	240.397	309.829	543.498	405.519	108.129	466.624	292.872	734.94	732.596	161.383
8833	GMPS	NM_003875	303.671	303.848	162.972	800.764	1536.74	554.709	141.517	368.37	565.677	600.081	480.061	171.501	128.062	186.051	191.849	141.842	142.141	208.887	519.189	1125.99	513.434	359.613	358.99	403.416	379.888	246.187	180.532	206.313	252.705	226.029	255.422	211.327	251.635	209.876	405.971	2016.51	941.342	189.351	624.553	390.184	270.663	394.851	533.998	429.226	87.4014
8837	CFLAR	NM_001127183 /// NM_001127184 /// NM_003879	968.748	289.813	316.572	449.375	826.187	1034.5	7002.36	1473.51	807.854	1070.35	894.754	276.036	470.421	133.873	174.148	279.669	147.373	318.67	332.797	326.813	638.318	266.664	617.118	824.87	173.535	810.857	423.933	414.488	529.921	799.672	549.372	249.849	495.815	189.441	405.292	224.245	414.546	288.101	839.554	926.167	422.88	379.875	652.835	677.469	152.511
8841	HDAC3	NM_003883	404.798	545.669	537.394	770.967	1405.56	557.528	527.918	591.758	664.17	578.24	668.515	311.324	401.505	369.184	307.874	258.071	323.771	295.375	462.211	508.605	623.196	349.421	277.187	644.496	575.231	291.004	342.629	403.622	556.947	492.956	464.873	448.46	487.614	544.944	462.012	286.823	510.518	432.873	688.983	612.329	469.883	449.632	479.074	497.329	38.2118
8848	TSC22D1	NM_006022 /// NM_183422	3754.12	3242.41	3032.07	317.604	734.742	1265.84	758.025	1144.78	760.454	759.901	1612.97	5754.24	3476.72	7661.53	9150.3	5674.2	6817.52	8125.44	6450.78	11280.2	2401.67	9641.72	7124.23	2179.17	1526.42	3732.09	3826.21	2772.9	4640.58	1474.75	3352.18	7121.39	3989.58	5637.55	3264.39	3164.55	3485.39	1877.01	1461.73	1916.88	12105.2	4704.32	3015.99	4097.43	72.1468
8859	STK19	NM_004197 /// NM_032454 /// NR_026717	177.62	1230.81	204.741	176.053	306.001	221.222	381.764	247.384	233.306	399.569	212.919	137.13	190.16	204.602	214.745	172.211	196.098	165.612	314.696	621.158	454.003	199.661	301.268	718.232	230.834	145.187	503.441	266.649	288.729	186.745	145.213	277.537	219.055	243.783	342.041	331.553	299.502	261.962	197.229	310.859	321.416	253.099	251.613	296.684	63.5594
8870	IER3	NM_003897	771.663	1484.55	5604.11	182.402	288.193	8610.73	2187.11	1141.57	260.123	258.641	793.813	234.701	179.629	197.231	318.682	283.143	174.205	255.849	8220.62	11654.7	11319.2	3135.55	1162.23	4113.27	3246.93	1269.84	1573.58	255.315	1955.74	1000.84	416.212	10242.3	747.702	1535.63	1563.68	368.815	7112.6	623.459	2383.06	3287.84	4535.09	2935.36	2088.99	2557.55	124.408
8872	CDC123	NM_006023	823.425	645.699	736.117	1435.76	2342.33	875.242	2034.36	1046.07	1057.67	936.329	870.038	776.391	512.793	706.814	743.609	714.402	714.824	629	676.319	744.715	1097.69	653.423	590.73	987.92	972.161	685.288	436.32	554.32	874.439	843.717	616.103	794.712	798.465	711.955	934.227	665.567	1873.16	744.003	1506.45	999.882	749.991	790.223	885.653	902.054	43.3217
8874	ARHGEF7	NM_001113511 /// NM_001113512 /// NM_001113513 /// NM_003899 /// NM_145735	804.584	564.932	423.332	763.886	782.919	291.062	438.837	534.537	563.739	1168.59	418.693	535.29	515.289	534.42	479.556	447.35	480.445	493.259	618.312	413.197	525.502	329.568	378.177	343.607	400.777	442.622	420.999	394.766	464.863	515.351	549.51	756.694	662.728	624.426	646.387	472.112	771.659	422.015	702.747	399.238	672.012	521.406	506.556	539.441	30.1963
8881	CDC16	NM_001078645 /// NM_003903	967.863	607.445	435.82	1232.82	1402.7	603.491	377.831	681.37	931.879	562.365	562.384	574.372	411.634	679.895	839.447	555.978	513.095	819.162	993.983	663.079	839.061	618.091	861.271	571.888	1076.23	558.672	498.531	379.797	1038.28	657.759	640.811	1218.76	741.983	577.142	945	816.925	771.985	546.335	904.283	1373.97	811.912	905.409	772.503	756.819	33.5497
8882	ZNF259	NM_003904	224.662	336.809	260.885	529.014	513.68	418.479	148.607	220.525	335.927	302.688	271.291	190.523	147.859	216.068	198.42	190.862	180.621	166.319	351.655	398.137	292.183	224.302	189.162	466.935	286.615	208.474	171.572	252.894	266.196	199.89	161.175	322.579	237.561	265.385	205.454	796.696	398.388	164.877	346.191	198.643	323.687	259.493	268.526	281.626	44.3365
8883	NAE1	NM_001018159 /// NM_001018160 /// NM_003905	1104.99	808.392	700.486	1324.2	1695.57	462.936	530.059	831.81	1835.88	1812.29	841.915	752.731	942.379	1128.71	1020.09	770.068	800.447	901.415	1066.61	1441.84	998.32	1104.5	1143.59	742.573	1024.65	650.388	499.722	371.139	768.316	638.085	852.591	877.827	855.228	738.527	1216.17	1199.54	1692.15	456.739	1101.79	496.908	647.217	970.258	1195.46	953.826	37.6068
8886	DDX18	NM_006773	540.812	256.822	406.482	657.857	849.769	522.414	438.403	702.275	1026.69	1738.1	533.479	240.085	288.581	394.919	390.73	274.554	221.285	442.825	515.216	753.369	639.841	535.508	738.375	334.692	487.015	340.153	284.386	220.267	380.047	469.993	175.837	298.053	318.497	339.395	544.328	298.709	524.093	169.763	644.482	425.813	376.141	492.438	665.349	485.996	55.8382
8887	TAX1BP1	NM_001079864 /// NM_006024	1112.92	1065.48	838.042	919.749	2285.87	1720.73	2249.81	1124.48	1254.64	1889.27	684.73	868.804	712.933	1453.83	1369	766.572	904.889	1413.57	1298.06	1908.33	1756.55	1654.97	1364.32	1530.23	1344.52	1085.98	941.751	462.69	1704.38	662.376	800.832	870.854	1615.34	1151.91	1246.93	929.627	914.512	669.383	1172.79	2884.97	1269.03	1099.92	1499.93	1266.87	39.0561
8892	EIF2B2	NM_014239	505.481	826.29	454.566	606.591	587.877	510.959	224.973	463.092	465.491	444.932	439.084	506.892	474.113	507.254	465.804	569.367	560.367	505.093	483.329	646.742	540.168	509.915	438.913	980.577	567.675	506.536	600.906	482.961	578.982	446.742	773.426	498.178	692.331	498.445	373.936	879.723	973.625	741.865	603.581	346.962	354.851	472.194	472.496	548.449	28.3584
8893	EIF2B5	NM_003907	265.953	383.423	309.831	692.017	577.847	400.034	163.517	363.747	686.213	469.343	319.845	296.678	398.825	366.181	292.054	264.138	312.47	279.468	512.179	338.446	527.256	334.155	184.259	433.398	355.287	275.001	280.484	361.014	418.922	380.117	458.415	766.974	357.396	542.578	416.703	190.717	415.426	360.111	552.453	290.55	339.239	336.197	350.851	386.505	33.881
8894	EIF2S2	NM_003908	547.744	490.39	481.54	666.481	1744	699.184	422.226	514.824	399.95	373.548	430.722	251.462	212.463	380.872	375.083	277.933	296.164	419.445	240.989	1617.58	462.123	582.923	553.271	478.175	275.443	379.544	270.386	289.272	430.701	272.242	542.836	310.87	546.971	301.175	530.402	483.465	383.978	246.004	690.63	460.676	370.673	411.861	715.44	484.457	61.5111
8895	CPNE3	NM_003909	1239.83	911.939	597.227	667.674	4321.06	705.245	1200.57	862.88	941.818	725.048	750.738	408.38	404.233	368.44	639.794	699.96	283.044	744.808	1014.35	1230.4	1059.03	863.848	1496.02	1912.32	1507.35	808.666	797.786	442.353	612.122	649.745	448.94	603.041	513.946	552.084	1280.92	159.406	919.515	626.468	1356.88	861.222	498.071	830.374	1288.11	902.457	71.6505
8896	BUD31	NM_003910	621.666	561.622	488.314	684.843	1068.23	1240.18	1546.54	779.157	917.302	2820.62	617.518	394.671	289.834	595.69	609.521	355.622	440.941	613.588	529.856	1145.13	826.256	743.769	671.411	972.17	476.72	283.181	401.162	522.645	999.62	417.354	302.569	464.731	599.382	661.797	632.29	1319.05	531.663	473.499	636.758	968.928	705.209	792.102	897.828	735.371	58.7591
8899	PRPF4B	NM_003913	377.341	177.63	159.641	377.788	1061.55	327.706	503.33	562.281	1065.52	1165.1	457.89	207.044	341.498	324.767	377.273	294.659	181.6	339.16	413.532	704.892	388.679	332.432	594.104	198.984	380.156	290.283	243.05	170.64	273.875	390.487	150.835	253.22	393.227	214.697	513.7	226.624	405.477	100.453	609.928	507.158	358.672	499.34	448.578	403.833	58.3283
8904	CPNE1	NM_003915 /// NM_152925 /// NM_152926 /// NM_152927 /// NM_152928 /// NM_152929 /// NM_152930 /// NM_152931	359.344	523.833	363.546	619.147	1363.88	327.769	1223.1	716.532	906.313	684.872	696.797	271.545	335.474	256.425	282.565	251.89	286.545	355.673	387.301	810.236	394.94	237.597	470.328	595.491	228.974	310.057	327.988	213.682	361.197	760.887	103.083	170.138	566.191	546.651	368.051	331.989	1080.29	611.475	803.365	1131.1	461.048	594.349	293.209	511.276	57.7671
8924	HERC2	NM_004667	287.834	496.118	205.941	642.668	905.1	118.45	181.312	281.294	405.693	233.168	285.173	535.923	535.824	808.203	817.979	487.12	548.927	777.491	538.781	386.472	350.415	382.441	362.856	301.251	706.096	347.111	203.182	131.793	207.453	188.379	377.165	225.933	254.415	254.834	432.362	187.74	516.555	144.55	400.126	372.662	239.542	348.214	440.763	391.984	50.6372
8925	HERC1	NM_003922	688.609	502.971	359.095	1137.91	1841.54	421.733	741.285	822.343	1599.94	2611.65	600.27	875.041	868.247	1371.77	1376.34	696.308	1157.92	953.579	545.933	394.584	343.176	433.056	627.804	355.159	628.42	774.645	368.078	340.019	363.389	500.85	1275.68	456.716	495.664	364.172	631.433	495.805	643.987	417.912	1000.27	1743.04	560.737	499.176	626.351	779.363	62.4516
8930	MBD4	NM_003925	569.935	237.022	188.752	2278.3	1139.94	840.679	1649.17	1032.72	1150.12	1408	724.239	301.005	414.804	376.541	480.198	307.337	241.484	451.826	513.282	659.891	421.969	585.11	877.754	302.443	1005.67	290.727	309.879	259.407	382.282	747.09	334.898	415.398	347.881	200.716	559.697	304.789	459.09	155.058	1036.43	789.619	553.584	582.473	678.153	617.799	69.5062
8933	FAM127A	NM_001078171	2279.6	3977.3	1200.15	226.555	581.61	1156.82	555.109	550.468	451.146	114.172	410.088	3689.86	2905.16	4683.16	3837.3	4194.16	4211.21	4350.53	1054.13	1930.35	1583.76	789.547	1587.25	4548.19	826.659	4010.53	1557.09	1082.37	964.393	920.747	2577.51	406.795	1432.05	1797.21	1214.41	774.172	933.47	1804.78	703.007	878.02	4352.68	2264.13	1746.62	1886.38	75.4716
8985	PLOD3	NM_001084	733.01	919.267	862.253	671.606	1259.6	989.104	251.082	477.331	565.979	426.005	870.836	712.177	537.603	534.389	555.868	813.911	704.141	808.597	499.956	1260.24	416.166	888.811	411.007	534.98	606.862	929.782	827.482	1115.38	685.304	821.599	657.392	806.404	1511.34	703.316	563.393	507.622	816.486	950.337	635.424	413.27	764.214	971.5	472.539	731.711	35.085
8992	ATP6V0E1	NM_003945	3936.03	2680.96	2011.15	2860.91	6268.2	4951.05	7053.01	4173.16	3257.09	3724.54	2402.71	1157.74	535.145	716.057	1223.57	1632.14	655.48	1823.62	2101.59	3221	2751.03	2902.79	5064.89	4957.89	2648.08	2482.91	3104.58	1818.91	2883.84	2200.01	1584.97	2220.39	3003.28	2083.05	2499.44	1174.41	4004.98	1834.8	3797.15	5763.94	2095.92	2952.18	2495.87	2853.73	51.6121
9039	UBA3	NM_003968 /// NM_198195	1001.51	586.785	384.605	1755.46	2846.6	1270.88	1236.53	1512.03	1632.27	1104.57	450.048	588.616	533.712	743.338	1186.93	682.196	604.98	1162.64	1080.57	997.938	599.999	953.283	1263.03	603.365	1036.63	824.884	425.21	249.023	633.179	453.079	717.06	964.557	911.163	323.35	1442.89	383.15	1510.06	152.74	1849.34	1004.28	632.726	782.362	1185.96	936.361	54.7212
9043	SPAG9	NM_001130528 /// NM_003971	422.56	190.82	184.41	132.001	349.621	337.1	901.937	271.477	205.452	331.169	199.811	407.358	372.227	453.669	578.612	556.081	405.629	863.429	174.886	1948.05	235.938	190.456	472.058	240.467	233.467	238.054	319.859	296.684	148.958	150.442	329.841	140.55	275.362	102.505	359.595	531.207	195.055	159.424	284.459	240.725	182.401	314.374	321.425	354.642	85.3278
9044	BTAF1	NM_003972	360.487	372.094	335.024	2169.06	3911	719.692	430.166	1187.85	1233.73	1080.29	684.491	251.56	248.271	342.673	483.669	268.649	243.461	456.557	970.276	1673.41	606.59	473.567	722.587	256.097	1410.85	245.896	210.333	195.45	343.212	412.366	157.28	962.09	334.827	298.723	1018.45	454.382	1013.93	243.393	2049.48	1127.86	334.132	503.317	664.283	731.663	95.6126
9045	RPL14	NM_001034996 /// NM_003973	6841.46	8435.8	5325.24	18151.6	13864.9	9197.84	4671.44	9454.35	10698	15704.4	6920.9	2024.44	1865.78	3046.06	3429.92	2066.38	2490.22	3954.82	9998.6	9848.41	9896.65	7962.37	6971.07	6728.28	8132.69	2851.74	3214.65	3966.64	5659.66	6170.72	6468.12	10956.3	3261.71	4833.65	7547.25	1568.43	7871.38	3475.1	7343.93	7715.88	8460.65	5771.12	11879	6899.94	54.4017
9049	AIP	NM_003977	400.792	579.021	354.508	596.626	956.009	885.54	831.36	743.125	1220.69	1300.32	620.498	704.329	723.607	597.492	450.03	642.271	597.088	559.938	337.076	450.88	357.065	348.052	345.587	507.61	260.807	564.399	548.181	588.449	515.722	1049.58	437.292	372.335	432.991	679.752	264.816	364.669	824.102	701.435	783.482	585.853	698.373	509.521	321.126	595.637	40.098
9061	PAPSS1	NM_005443	1523.87	374.55	892.731	750.882	2043.62	1221.43	1592.44	1049.08	910.03	554.393	1198.93	2068.93	1114.51	2378.62	2300.06	2128.53	1799.43	2354.22	1541.47	2358.39	1822.03	656.769	1682.66	1353.03	3648.96	418.688	660.893	166.975	1472.25	887.859	155.943	728.007	567.469	924.723	1740.74	524.841	769.822	349.619	1407.7	1342.94	1006.4	4259.24	1768.69	1359.82	63.2319
9070	ASH2L	NM_001105214 /// NM_004674	965.719	671.743	487.954	537.83	1237.35	942.039	1067.65	1155.68	648.066	479.831	669.843	633.873	763.574	966.318	879.63	814.171	691.47	641.219	761.661	621.33	823.647	581.879	559.734	667.805	717.718	720.817	525.941	671.176	604.89	679.731	848.891	275.577	866.366	655.377	602.525	1332.46	1049.58	240.878	963.936	1975.46	802.646	693.6	621.827	770.219	37.9581
9092	SART1	NM_005146	283.258	398.172	175.67	533.597	1000.8	592.859	504.527	444.237	511.522	456.024	365.225	367.994	303.302	311.757	305.763	280.034	279.544	458.528	266.895	415.566	316.139	386.542	308.42	378.841	243.662	246.095	231.413	143.764	388.975	373.219	381.173	158.501	293.976	424.972	298.821	288.661	407.717	302.366	538.705	491.603	336.325	352.858	398.175	370.842	38.275
9097	USP14	NM_001037334 /// NM_005151	1453.45	519.494	383.307	464.343	1097.39	456.29	365.08	661.639	1238.36	1583.24	985.317	948.005	700.703	1098.43	1071.03	962.288	869.705	1118.71	885.255	1410.12	900.132	525.658	1024.17	752.089	487.179	760.002	367.24	439.3	533.112	642.958	993.267	346.984	1001.24	742.881	959.022	403.088	865.85	375.628	893.202	726.54	1401.02	873.412	969.894	819.908	39.7004
9107	MTMR6	NM_004685	511.234	466.88	161.032	386.83	1314.66	661.609	1235.81	651.606	1124.82	1611.55	522.235	449.764	272.974	668.582	1032.59	441.947	534.227	678.158	480.092	591.939	293.805	426.608	561.488	121.575	458.965	289.876	296.654	121.635	571.703	301.779	303.899	794.999	333.205	313.668	674.795	886.112	1106.14	257.672	611.98	966.468	726.238	462.633	419.584	583.722	57.1379
9110	MTMR4	NM_004687	350.269	415.548	280.284	965.008	763.531	264.72	610.067	782.305	592.395	427.013	523.951	506.057	890.084	858.72	767.474	554.033	758.99	606.226	577.608	303.531	370.739	410.472	648.154	357.117	320.728	400.485	402.441	536.213	330.177	528.942	208.581	180.941	1309.13	403.701	463.022	524.276	719.773	317.663	604.244	576.107	270.684	399.854	352.559	521.717	43.5482
9112	MTA1	NM_004689	211.074	343.571	209.569	274.193	158.646	258.147	217.662	254.181	332.601	219.518	363.858	443.876	546.8	284.372	270.268	298.658	308.716	225.615	314.129	395.336	130.609	158.361	610.613	315.813	130.926	596.313	212.417	247.019	261.852	418.382	288.801	137.634	260.758	358.842	218.583	711.121	296.188	322.481	281.655	260.216	391.329	360.791	133.605	303.142	42.4413
9114	ATP6V0D1	NM_004691	1103.55	1786.07	730.138	754.362	1857.65	5179.28	7988.14	2755.7	853.689	1309.71	1634.92	1549.99	1922.63	2511.9	2043.92	2229.88	2306.81	2087.23	915.652	919.076	1495.57	2552.53	1112.53	3596.35	165.459	1292.31	1963.88	1564.73	2034.07	1585.79	1550.81	590.081	1535.23	1378.98	1068.43	1702.76	1216.82	1302.16	1680.95	3839.27	1111.39	1693.44	1279.46	1854.73	70.7981
9124	PDLIM1	NM_020992	1887.62	655.686	3418.61	4444.38	1361.59	596.394	666.953	1051.7	323.099	439.864	1293.19	219.804	226.106	193.733	177.755	427.432	238.303	182.942	4226.94	396.752	4876.15	8202.87	1841.12	4533.79	3433.44	3217.18	1061.59	2793.99	4954.85	3150.14	4086.63	5690.62	2885.38	2116.88	2424.94	496.398	3089.62	2494.28	2215.11	1209.08	8473.54	3486	3819.25	2394.92	86.978
9146	HGS	NM_004712	545.756	947.625	644.108	360.799	427.855	978.876	1692.76	683.784	903.246	702.86	624.165	780.162	951.168	860.668	669.634	773.749	808.847	661.721	617.143	1004.34	675.61	647.499	456.786	1406.21	247.94	597.118	580.527	321.247	778.708	848.29	512.44	476.502	771.609	622.43	428.159	1263.32	539.119	863.277	631.336	552.313	635.446	777.712	526.352	716.261	38.2965
9147	SDCCAG1	NM_004713	609.263	236.454	378.705	857.703	1128.2	535.588	512.425	723.107	1379.31	977.099	554.44	523.068	577.037	694.464	863.388	654.75	591.664	804.956	907.934	679.601	599.975	411.363	730.689	351.109	1360.18	434.543	386.349	283.812	501.836	428.551	537.718	1864.3	495.31	323.476	706.609	322.327	1200.66	248.468	907.508	749.599	751.566	688.545	513.473	674.119	49.2116
9158	FIBP	NM_004214 /// NM_198897	597.118	1022.88	458.619	551.912	1687.66	1167.55	576.544	607.923	816.602	750.397	597.94	772.985	933.624	1283.24	833.148	837.068	1042.83	757.168	674.933	853.818	753.652	554.242	580.361	1142.94	564.981	680.483	583.021	528.481	930.545	724.004	825.421	499.51	709.292	813.723	590.658	1478.03	1350.42	591.742	1007.62	595.397	840.516	999.752	689.519	810.657	33.9477
9167	COX7A2L	NM_004718	1554.54	3315.81	1134.85	2081.37	4958.21	2592.93	1234.82	2212.17	2358.32	2572.08	1797.12	1999.54	1424.62	2137.23	2077.43	1589.04	1829.74	1687.74	2042.08	2131.11	1794.91	1393.1	1833.96	1824.22	2634.32	1738.81	1634.4	1949.1	1574.87	1248.35	1256.91	1688.37	1288.04	1229.43	1295.07	1277.62	2967.19	833.993	2181.52	2110.68	1638.76	1717.15	1214.46	1885.02	37.3099
9168	TMSB10	NM_021103	14967.2	8106.28	7657.64	20344.7	22623.6	21156.7	13564.3	19971.8	18405.4	21189.7	10446.2	5395.15	1832.81	10223.7	9553.3	5009.2	8810.36	7034.47	9186.05	5787.71	10809.5	19517.4	13471.6	13137.1	14092.6	5704.64	4937.12	3788.71	13697.6	13158.4	4123.93	8151.67	7238.18	6975.4	9734.61	5996.75	18455.7	8384.12	13012.1	17373.4	18214.8	14579.4	13084.9	11602.5	48.072
9169	SFRS2IP	NM_004719	1283.54	240.745	290.73	969.893	991.08	1366.52	2655.79	1469.84	1112.01	1884.66	629.424	126.9	350.525	193.514	253.417	167.501	160.995	357.14	708.046	785.972	525.917	328.446	1089.66	218.668	774.055	336.54	563.763	323.468	289.727	835.154	480.907	186.11	383.854	569.375	874.88	317.099	209.949	295.578	930.342	788.075	1118.78	599.383	859.167	672.027	76.8649
9181	ARHGEF2	NM_001162383 /// NM_001162384 /// NM_004723	743.449	161.511	276.484	680.688	568.713	951.751	2403.52	1270.09	428.272	363.907	690.975	1026.49	919.673	805.226	657.147	735.773	803.867	796.78	309.568	1039.44	149.745	235.404	342.168	326.797	122.902	514.322	189.218	113.506	428.311	740.89	160.86	226.841	475.066	159.947	252.135	327.733	600.703	324.854	746.552	807.783	393.46	483.774	223.431	557.668	73.7992
9184	BUB3	NM_001007793 /// NM_004725	746.834	665.849	382.835	1475.17	1715.22	634.673	987.329	1414.2	2468.91	2638.72	929.833	383.298	578.479	646.386	754.887	667.021	477.569	828.581	969.439	1301.69	880.97	726.553	1090.46	799.118	768.366	436.59	406.253	373.319	511.273	859.022	372.742	733.123	542.659	478.069	930.697	812.103	1671.44	339.975	1369.73	805.867	585.031	908.014	1035.24	886.129	57.436
9188	DDX21	NM_004728	939.281	1120.54	1783.26	2215.31	4937.56	2396.33	1087.17	1734.49	3541.86	4115.68	2177.05	396.049	409.569	579.586	727.571	349.267	529.055	729.313	2787.9	4231.7	2013.97	772.124	652.057	496.17	1650.18	879.959	1081.65	1265.31	1135.82	1011.86	883.527	1302.25	984.419	849.555	1285.51	1026.57	2929.81	616.04	2174.61	3640.5	1247.1	963.803	693.318	1542.9	74.095
9202	ZMYM4	NM_005095	425.475	176.494	209.541	260.009	493.874	259.5	133.533	285.014	300.152	220.176	238.821	323.645	397.518	520.716	502.836	378.936	332.779	396.451	526.692	315.401	282.303	243.04	597.192	158.081	307.398	294.935	197.98	141.466	255.789	249.699	281.42	232.769	311.943	273.537	337.167	394.302	279.966	141.834	348.581	213.959	464.704	465.002	349.841	314.43	35.9748
9208	LRRFIP1	NM_001137550 /// NM_001137551 /// NM_001137552 /// NM_001137553 /// NM_004735	837.656	446.589	729.47	2157.45	5671.03	2928.58	4641.55	2871.69	1907.42	2858.57	1382.23	386.562	353.681	514.844	558.461	328.21	359.771	602.946	1634.58	1778.39	2293.84	1633.4	1071.5	790.414	970.3	422.045	831.161	561.361	1660.34	1036.93	508.477	982.06	666.446	886.43	1256.93	254.281	1231.37	478.491	1775.68	2727.77	2490.08	1253.5	2121.83	1415.22	81.4977
9218	VAPA	NM_003574 /// NM_194434	3378.12	5456.06	2585.82	2394.13	4697.73	5518.92	6993.56	4146.02	3739.63	4007.83	2893.11	2590.93	2205.36	4032.09	4924.45	3624.23	3285.87	4541.39	5052.62	5398.1	5088.36	7324.33	4724.91	5760.13	4868.21	3820.51	3155	2049.01	4896.53	1990.46	4730.53	3592.72	3099.49	2052.16	3335.47	2247.08	3984.63	2009.22	3180.95	5539.16	3808.98	3295.74	3517.14	3942.71	33.3644
9221	NOLC1	NM_004741	234.7	276.712	284.961	732.006	1177.98	301.663	257.261	387.618	556.417	409.188	549.754	275.382	332.977	492.093	511.972	260.915	388.109	395.483	538.064	777.529	498.471	190.037	392.983	289.178	452.529	204.486	196.056	249.623	329.894	340.711	269.473	500.252	312.05	347.748	292.748	251.3	626.926	288.094	704.198	362.365	259.92	339.998	360.834	400.015	47.3096
9240	PNMA1	NM_006029	1194.19	1223.04	404.93	471.749	930.027	282.897	298.838	730.787	1489.04	959.78	243.877	1591.38	1581.43	3434.1	2900.8	1784.28	2453.24	2115.93	583.692	697.018	261.783	1019.61	1737.36	528.05	320.761	480.935	649.138	104.342	757.621	518.231	231.914	478.075	457.676	785.636	547.99	2270.61	1199.99	373.05	643.471	557.522	2098.86	1077.56	693.037	1003.82	77.5047
9246	UBE2L6	NM_004223 /// NM_198183	694.892	1038.47	851.436	1169.42	2809.74	1905.4	3687.5	1785.33	1632.81	1506.94	1302.39	737.723	665.045	689.307	601.202	805.541	738.315	740.365	663.721	299.514	855.521	708	1040.66	724.447	873.823	674.265	672.421	1213.41	1369.04	1178.35	518.347	705.626	671.955	796.567	606.659	436.332	1449.69	770.788	1851.65	1201.45	440.137	887.183	795.392	1041.09	60.9756
9255	AIMP1	NM_001142415 /// NM_001142416 /// NM_004757	608.869	205.602	329.03	734.135	1379.3	750.315	337.51	639.444	1039.41	1531.4	529.22	305.124	276.098	324.034	383.188	370.498	214.224	507.013	581.395	1014.63	732.8	537.943	763.945	474.992	357.98	450.158	363.586	283.363	438.087	449.773	579.877	404.353	428.844	298.987	598.627	296.551	427.526	247.273	750.002	284.806	476.216	920.54	535.69	538.66	53.9538
9276	COPB2	NM_004766 /// NR_023350	1309.78	986.138	708.111	654.975	726.472	998.672	1049.04	835.151	492.352	644.184	956.435	568.001	403.023	569.109	758.065	590.082	577.975	791.591	825.266	2441.73	1124.56	1399.2	1474.78	879.998	705.343	788.522	788.339	955.162	1057.62	572.056	503.101	1005.35	1312.79	1173.25	1119.85	783.049	927.896	739.134	874.342	801.097	941.935	1397.36	1352.73	920.084	39.0876
9295	SFRS11	NM_004768	985.463	418.777	331.366	1759.92	2933.41	514.533	562.648	1498.78	2776.36	2809.5	532.266	508.095	730.481	663.287	1299.85	410.166	510.79	968.998	1453.21	1272.88	611.004	911.277	1751.28	237.898	1175.55	367.763	439.743	383.975	509.217	432.741	411.934	1349.27	656.38	373.625	1665.33	619.849	1021.29	258.321	1452.64	1081.99	1065.75	1040.74	1282.83	977.702	69.1435
9296	ATP6V1F	NM_004231	1585.6	1747.57	490.887	752.209	1933.71	2778.41	1365.67	1550.91	1532	2894.38	803.045	2092.55	1924.42	2547.1	2347.39	2093.58	2417.4	2347.72	819.923	2105.22	3015.86	1055.18	1025.36	4322.42	923.538	1451.1	2105.65	590.86	1528.52	1062.72	1602.17	447.046	1612.86	870.471	1259.66	2847.34	1433.95	556.993	1464.89	1652.78	1405.99	1396.36	2497.38	1680.44	48.0196
9318	COPS2	NM_001143887 /// NM_004236	1320.85	645.485	244.755	737.799	1677.32	850.894	590.754	563.709	1272.53	1596.94	640.79	503.816	509.236	751.694	815.259	692.553	550.137	675.787	1073.31	2684.96	1125.54	614.781	1162.95	702.732	1138.63	802.188	333.539	246.081	422.6	414.122	971.918	764.778	570.876	344.719	979.408	588.907	573.737	270.063	843.539	1192.57	702.34	885.526	1229.52	820.457	54.8493
9320	TRIP12	NM_004238	1501.1	669.075	538.647	1378.23	3599.09	1394.04	2673.79	1590.68	1506.94	1706.58	694.239	524.443	263.997	919.563	984.603	678.147	515.68	1165.79	804.707	2221.62	1316.74	1283.35	1365.38	1191.88	603.512	788.581	474.726	235.055	1075.94	862.022	727.431	459.209	1070.66	811.718	1071.49	3467.7	1271.38	168.372	1984.44	3954.85	965.319	1020.35	1258.07	1226.96	69.519
9324	HMGN3	NM_004242 /// NM_138730	2875.95	2810.54	1422.53	4746.65	8322.11	3271.66	951.193	2742.7	2742.97	3112.83	2379.92	2578.25	3126.55	2377.96	2906.63	2155.37	2059.93	2895.93	4036.26	875.614	3781.14	1818.77	2704.22	2491.55	6646.35	3447.76	3078.16	2034.84	6322.98	1770.41	2982.6	3746.61	3725.05	1796.55	2880.36	2379.42	3969.18	2044.91	4678.6	2032.38	2421.05	2751.26	2888.29	3041.49	46.6942
9325	TRIP4	NM_016213	504.03	268.071	306.784	544.042	915.987	736.377	811.547	552.41	500.423	362.057	344.73	196.893	190.193	271.289	226.069	231.674	162.187	215.433	448.283	313.339	631.616	594.269	340.95	574.263	581.923	275.857	340.565	226.085	584.518	408.211	216.115	130.312	530.647	370.776	509.275	305.899	395.233	320.226	672.76	346.587	502.644	467.309	414.051	414.928	43.7073
9326	ZNHIT3	NM_004773	634.555	581.361	574.974	657.267	865.413	678.72	539.123	606.361	1064.44	2783.78	530.743	646.107	649.136	979.301	873.336	630.55	805.111	673.165	503.622	804.625	642.559	498.52	629.741	604.851	541.243	485.719	449.309	555.383	534.378	554.975	853.036	400.453	459.918	569.986	517.501	1151.84	1105.68	444.542	653.086	340.809	471.187	566.437	494.287	688.538	54.5995
9334	B4GALT5	NM_004776	612.218	1178.98	526.284	189.64	548.479	1339.49	2572.57	915.583	323.616	727.225	610.62	468.45	707.905	780.378	604.695	544.498	627.782	481.35	705.566	816.802	534.911	888.925	388.003	854.895	418.443	525.454	711.693	444.565	1048.73	417.865	886.606	906.749	771.223	486.435	389.439	581.867	636.101	223.567	452.68	1107.44	812.567	619.643	343.487	691.475	55.6706
9337	CNOT8	NM_004779	483.484	223.479	109.599	436.13	1958.65	515.432	1225.48	833.439	1101.71	1076.38	415.803	193.555	219.966	334.814	311.268	281.334	224.18	308.565	211.26	538.858	234.076	256.239	468.387	272.902	141.969	230.563	180.016	195.298	205.928	403.775	104.552	131.092	279.853	194.974	412.837	313.788	372.411	135.211	740.946	661.402	386.857	432.342	337.076	420.834	84.7235
9341	VAMP3	NM_004781	2702.79	1326.89	739.096	201.127	2026.71	2429.99	2964.82	1090.75	836.551	1142.28	789.725	998.48	330.077	707.853	963.831	1581.65	588.605	2187.84	916.544	1460.6	1561.57	1166.5	1690.07	2371.07	865.422	1388.67	768.196	714.966	790.382	927.984	1099.77	580.775	1719.45	562.567	1523.08	864.319	446.909	467.697	933.37	903.427	1096.53	1204.56	2013.62	1201.1	53.9362
9349	RPL23	NM_000978	4688.78	1305.8	1819.71	2923.91	6470.95	3463.17	2171.87	4025.56	5878.23	8015.27	2807.95	634.78	852.828	1125.1	1351.98	829.429	950.462	1389.15	3590.12	5320.63	4225.48	2300.43	3567.37	3184.52	1663.24	1350.37	1497.93	1361.2	2487.14	2761.38	2445.74	1260.82	1414.28	2649.16	4458.76	705.949	2915.91	1757.9	3431.21	1498.47	3922.62	2837.94	5362.15	2759.9	61.682
9352	TXNL1	NM_004786 /// NR_024546	2304.61	2493.15	1360.37	2843.88	3971.52	2580.6	2093.81	2196.75	2469.99	2938.03	2184.31	1218.29	1237.74	2309.93	2450.72	1550.95	1833.76	2215.66	2755.23	3249.64	2851.18	2772.32	2476	2738.64	4018.32	1937.04	1650.96	1780.41	2183.68	1430.49	3233.32	3865.79	2200.8	1752.64	1869.71	2200.72	3583.76	3780.92	2744.39	3954.2	2078.63	2335.12	2639.72	2472.97	30.3016
9354	UBE4A	NM_004788	1629.01	817.449	606.485	1633.47	2230.49	1725.11	2111.56	2054.97	1725.21	1994.98	835.501	1146.34	1391.79	1594.02	1800.02	1233.06	1093.96	1954.85	1413.7	1166.23	1032.74	1542.11	1554.72	788.591	1097.02	979.673	764.143	413.148	1017.64	826.897	992.356	1245.1	785.338	1064.56	1365.73	928.506	1780.69	388.145	1530.32	1246.11	833.814	1268.26	1431.46	1279.89	35.8401
9367	RAB9A	NM_004251	990.341	1307.09	512.278	783.316	961.645	1066.78	704.295	602.278	834.493	1007.17	736.651	483.417	325.827	472.183	647.663	635.478	394.439	725.569	863.118	805.737	972.903	1443.21	559.431	911.141	927.999	457.4	593.326	395.083	698.007	594.516	442.499	657.424	773.602	691.761	869.037	151.283	1059.62	327.444	1233.64	410.432	338.024	853.981	971.342	725.416	38.9731
9371	KIF3B	NM_004798	435.883	414.15	301.056	478.468	429.781	312.682	339.056	356.929	339.892	396.67	203.817	436.103	577.516	1001.73	1042.15	384.775	639.459	662.966	514.595	387.16	218.905	414.666	374.604	107.116	249.906	172.517	627.321	355.446	703.642	342.704	139.686	328.328	245.827	322.056	370.799	661.261	358.849	206.406	314.239	239.46	600.353	507.476	306.745	414.492	47.9531
9375	TM9SF2	NM_004800	2140.24	1775.97	1650.4	1534.79	7083.55	3050.82	5617.92	2224.88	1777.43	1718.96	2452.1	1035.86	957.769	1410.4	1527.25	1455.21	1124.34	1228.61	2363.69	3288.59	2313.04	2923.64	3571.32	2816.03	1182.23	1780.21	2221.5	3147.4	2383.27	1417.99	1022.67	2429.24	3484.14	1781.78	2430.14	2298.46	2627.91	1511.3	3461.85	2739.68	1296.18	2220.69	2184.88	2294.52	50.9273
9377	COX5A	NM_004255	3213.37	2380.23	1462.84	2307.15	5661.25	3333.04	972.307	1911.79	2356.86	1421.24	1976.4	1769.58	1621.89	3040.65	2863.03	1728.2	2441.3	2969.79	1569.01	2306.41	2252.98	8404.45	1840.19	4911.02	1489.37	6083.79	2740.54	3349.25	2036.44	1107.31	11118.5	1414.47	1470.86	1099.98	2073.39	3237.01	1636.45	1721.48	3115.03	1678.1	1616.68	1931.59	4197.52	2740.3	71.4467
9380	GRHPR	NM_012203	906.798	2146.69	607.349	909.888	1438.79	659.117	326.486	546.326	612.638	448.452	573.645	684.815	533.63	693.743	592.826	718.975	669.085	848.035	580.589	597.446	781.8	666.828	638.1	1160.77	1135.3	1044.33	1826.7	6384.2	694.789	496.359	1390.42	583.203	546.968	807.329	701.492	556.786	796.129	739.118	887.213	467.772	607.112	709.297	707.854	916.865	100.778
9403	SEP15	NM_004261 /// NM_203341	2021.61	1067.45	922.845	2404.21	5513.1	1938.1	1563.49	2225.35	2168.41	2631.95	1285.66	481.072	420.318	788.79	1426.71	827.548	652.662	1574.67	1271.52	2655.86	752.236	2018.72	2561.4	657.994	894.808	611.304	1350.82	1781.17	1113.96	885.941	656.343	1185.99	1591.96	1003.38	1788.44	1192.29	1777.51	1211.54	2667.57	1934.54	1396.19	1853.69	1860.71	1548.6	57.2888
9422	ZNF264	NM_003417	393.293	328.308	461.193	318.846	262.872	348.543	349.776	390.201	372.797	328.056	229.219	374.847	529.251	336.005	270.25	360.363	294.473	268.212	457.76	332.808	421.832	162.958	843.546	479.965	554.424	169.081	193.574	140.528	372.158	488.447	203.383	154.96	275.345	142.686	322.845	187.437	609.301	185.667	305.027	175.9	404.057	338.232	504.104	340.524	41.7646
9439	MED23	NM_004830 /// NM_015979	260.529	191.689	159.703	377.163	477.112	188.17	368.992	628.255	807.201	891.809	277.14	201.574	278.032	291.158	341.512	199.243	183.121	287.844	488.622	359.729	282.817	409.088	542.646	226.697	552.836	184.688	211.36	143.66	275.747	288.704	220.793	421.832	275.203	253.193	408.838	170.25	513.672	179.444	377.513	317.399	294.123	466.47	427.066	341.922	48.4475
9444	QKI	NM_006775 /// NM_206853 /// NM_206854 /// NM_206855	872.837	280.074	198.315	433.652	1400.07	1072.73	1413.48	715.502	474.364	546.369	363.025	849.675	335.52	818.749	1494.91	1140.69	592.152	2719.4	564.277	995.674	331.799	212.701	434.279	184.041	701.009	742.023	281.199	179.837	230.892	341.451	850.599	266.517	668.175	170.181	798.188	450.077	517.743	115.064	637.856	595.343	551.546	489.863	561.029	641.695	73.9055
9445	ITM2B	NM_021999	8190.58	6368.56	3534.07	3052.14	8124.02	7795.99	14978.5	8957.83	6478.08	5128.98	3852.92	3443.64	4755.81	3982.27	7686.55	4350.37	3757.8	7421.83	4225.04	4663.89	6684.46	7480.24	14053.6	5256.43	2932.37	4620.91	8823.15	4508.79	4564.43	4075.62	2894.4	6059.61	8443.15	3278.1	8412.79	2309.2	3977.52	4351.59	4924.81	13755.5	4108.63	6403.01	9770.86	6103.21	48.9937
9446	GSTO1	NM_004832	1507.25	4112.68	1874.12	2412.91	4695.69	7882.2	2154.71	2625.97	1689.63	1518.92	2250.12	1449.49	944.332	2158.83	1979.15	1291.2	1788.96	2218.25	1829.29	3623.52	2444.84	1845.63	1586.92	2177.07	2171.76	2882.66	2440.36	7774.21	3467.5	1563.98	2665.67	3597.4	1806	1758.75	1382.38	445.184	4138.55	1465.26	2403.74	3471.96	2303.61	2304.28	1888.88	2511.48	58.7398
9467	SH3BP5	NM_001018009 /// NM_004844	1799.55	5217.43	451.389	2529.12	1807.03	1281.54	1497.25	1106.22	1818.14	746.278	722.477	771.043	1553.34	1333.31	1081.97	721.751	953.36	886.456	1114.92	879.076	768.47	180.438	1124.47	456.114	1956.39	226.53	1082.15	389.392	655.014	1030.94	200.338	580.135	1030.03	230.947	961.866	660.073	918.416	692.012	945.585	1163.98	796.823	837.051	989.581	1073.22	76.0856
9474	ATG5	NM_004849	361.768	236.066	226.328	337.82	406.225	264.369	443.258	256.201	380.653	484.682	232.984	162.506	165.945	314.185	293.809	206.167	234.47	232.414	228.834	320.222	249.565	552.14	432.626	164.594	245.19	223.355	226.583	193.434	273.001	214.774	202.482	207.196	357.162	227.501	270.557	192.356	242.814	153.174	263.773	149.554	264.872	351.476	291.752	272.996	33.4984
9482	STX8	NM_004853	1172.88	519.031	420.393	720.553	1096.72	1003.78	542.008	765.519	858.998	950.55	559.116	488.064	388.772	681.488	630.904	565.517	601.856	709.884	673.769	414.499	778.77	804.136	869.167	898.437	616.01	512.396	411.462	497.687	720.874	428.409	1012.78	726.066	388.853	523.669	727.334	1621.46	980.975	509.537	587.769	542.437	663.517	663.108	780.882	698.373	35.2298
9488	PIGB	NM_004855	328.409	183.179	243.008	488.167	708.207	341.5	1253.54	550.128	495.334	628.488	293.176	221.548	143.769	203.557	239.584	185.919	187.704	201.903	429.089	181.745	320.574	293.776	390.642	271.644	399.724	158.179	296.768	256.273	285.235	240.656	128.776	374.195	188.455	264.836	299.74	288.954	312.254	230.274	501.636	475.65	161.879	284.595	280.307	330.534	59.0267
9491	PSMF1	NM_006814 /// NM_178578	547.53	432.327	133.353	388.265	895.591	653.812	846.238	917.972	701.295	606.173	453.856	286.52	257.91	374.433	408.799	335.897	279.925	456.957	491.401	452.657	310.247	531.172	552.595	638.581	472.591	383.743	313.494	689.611	414.854	382.456	631.133	281.661	251.323	327.688	496.891	1593.12	404.409	306.453	477.832	8016.82	668.054	471.063	502.046	675.32	173.507
9519	TBPL1	NM_004865	276.085	253.941	219.374	590.172	822.996	467.65	671.853	632.554	741.79	1390.29	423.469	384.376	468.204	725.256	1108.15	541.634	597.296	663.325	380.389	477.867	275.23	444.934	462.208	269.454	317.782	256.875	220.735	267.159	373.66	272.795	202.434	377.017	381.509	323.456	347.194	3018.23	808.715	162.264	455.324	1049.13	335.091	370.248	375.094	539.61	86.326
9520	NPEPPS	NM_006310	492.04	475.823	335.671	562.908	785.037	507.193	1170.67	662.026	488.045	483.281	263.673	477.932	675.821	818.068	828.782	518.768	592.01	625.505	496.046	777.469	1185.1	688.301	698.897	1157.88	602.421	420.277	436.59	118.019	293.781	357.472	900.768	126.999	573.064	386.358	708.308	395.722	372.42	229.509	522.908	383.803	444.03	563.234	642.419	563.839	43.462
9525	VPS4B	NM_004869	855.545	544.959	935.039	1529.76	1741.78	1311.42	2213.78	1583.52	1666.28	1390.38	858.134	700.974	811.775	667.655	855.912	915.967	701.204	887.479	1500.35	670.156	2582.27	1668.77	923.491	2826.75	1922.51	528.16	492.003	603.883	1028.42	748.511	346.357	1988.62	1283.83	692.404	1697.46	396.91	2671.01	652.226	1651.21	1019.84	889.885	840.38	1047.76	1182.44	53.0676
9527	GOSR1	NM_001007024 /// NM_001007025 /// NM_004871	491.013	305.573	239.025	371.078	395.821	269.585	317.297	307.204	394.277	734.835	258.618	415.944	502.823	454.336	418.86	406.217	313.449	456.533	525.704	590.983	406.891	665.217	743.806	333.048	607.261	249.168	271.872	235.177	430.858	295.631	182.692	288.003	395.947	358.029	503.013	222.735	929.068	229.423	403.056	377.765	564.641	455.292	589.293	416.443	38.2804
9528	TMEM59	NM_004872	3621.37	3549.57	3035.1	2144.46	4465.05	3693.01	7104.36	2897.07	2487.44	2938.6	4104.87	1801.47	1364.21	2201.76	2531.67	2425.92	1798.62	3572.62	2955.15	4475.51	4777.07	7088.08	6431.11	3935.11	1883.17	2631.75	3643.71	3484.65	4704.65	1933.98	1769.65	2285.15	5076.14	3841.94	3476.9	2310.68	2711.52	2621.15	2299.47	4164.28	2200.74	3014.62	3403.99	3322.26	40.5933
[truncated: 1,043 more rows]
